# Supplementary material for: De Novo Transcriptome Analysis of Durum Wheat Flag Leaves Provides New Insights Into the Regulatory Response to Elevated CO2 and High Temperature
Source: Front Plant Sci. 2019 Dec 6;10:1605. doi: 10.3389/fpls.2019.01605 (PMC6915051; doi:10.3389/fpls.2019.01605)
Supplement: Supplementary file 2 [file DataSheet_2.xlsx]

## Sheet: Elevated CO2 FDR<0.05
Supplementary Table 4. (A) Differentially expressed transcripts under elevated [CO2] (EC-AT) relative to the treatment under ambient [CO2] and temperature (AC-AT) considering a FDR value <0.05 and a fold-change <-2 or >2 for down or upregulated genes, respectively.
IDENTIFIER	BINCODE	NAME	DESCRIPTION	logFC	logCPM	PValue	FDR
17147	1.1.1.1	PS.lightreaction.photosystem II.LHC-II	|MERCATOR: (original description: no original description)||TAGI: DR738151;homologue to UniRef100_Q41421 Cluster: Chlorophyll a/b binding protein; n=1; Solanum tuberosum;Rep: Chlorophyll a/b binding protein - Solanum tuberosum (Potato), partial (85%);Evalue=4E-115;%ident=100|MAPMANSTORE: moderately similar to ( 343) AT2G34430 ; Symbols: LHB1B1, LHCB1.4 ; LHB1B1; chlorophyll binding ; chr2:1452481…	3.97406	1.51926	0.000320115	0.0383941
35364	1.1.1.1	PS.lightreaction.photosystem II.LHC-II	|MERCATOR: (p12329|cb21_maize : 80.5) Chlorophyll a-b binding protein 1, chloroplast precursor (LHCII type I CAB-1) (LHCP) - Zea mays (Maize) & (loc_os01g41710.1 : 72.8) no description available & (at1g29930 : 66.6) Subunit of light-harvesting complex II (LHCII),which absorbs light and transfers energy to the photosynthetic reaction center.; chlorophyll A/B binding protein 1 (CAB1); FUNCTIONS IN:…	8.12074	4.86042	2.67057e-06	0.00535974
41213	1.1.1.2	PS.lightreaction.photosystem II.PSII polypeptide subunits	|MERCATOR: (original description: no original description)||TAGI: TC399258;photosystem II polypeptide [Triticum aestivum];Evalue=0;%ident=98.75|MAPMANSTORE: weakly similar to ( 131) AT1G79040 ; Symbols: PSBR ; PSBR (photosystem II subunit R) ; chr1:29736085-29736781 FORWARDweakly similar to ( 149) PSBR_SPIOL Photosystem II 10 kDa polypeptide, chloroplast precursor - Spinacia oleracea (Spinach)wea…	-3.2986	2.18048	0.000340784	0.0396872
91738	1.1.1.2	PS.lightreaction.photosystem II.PSII polypeptide subunits	|MERCATOR: (original description: no original description)||BRACHYPODIUM GENOME: Bradi4g07440.1 ; weakly similar to ( 117) AT5G02120 | Symbols: OHP | OHP (ONE HELIX PROTEIN) | chr5:419144-419633 FORWARDweakly similar to ( 132) loc_os05g22730 12005.m06569 protein expressed protein no original description|	-6.22892	0.348017	0.000412399	0.042856
52830	1.1.30	PS.lightreaction.state transition	|MERCATOR: (loc_os11g10690.1 : 199.0) no description available & (at4g23200 : 123.0) Encodes a cysteine-rich receptor-like protein kinase.; cysteine-rich RLK (RECEPTOR-like protein kinase) 12 (CRK12); FUNCTIONS IN: protein serine/threonine kinase activity, protein kinase activity, ATP binding; INVOLVED IN: protein amino acid phosphorylation; LOCATED IN: vacuole; EXPRESSED IN: 7 plant structures; …	-9.42033	2.89697	1.92776e-05	0.0113793
60526	1.1.30	PS.lightreaction.state transition	|MERCATOR: (loc_os12g14480.1 : 88.2) no description available & (at1g69730 : 68.6) Wall-associated kinase family protein; FUNCTIONS IN: kinase activity; INVOLVED IN: protein amino acid phosphorylation; LOCATED IN: endomembrane system, integral to membrane; EXPRESSED IN: 18 plant structures; EXPRESSED DURING: 12 growth stages; CONTAINS InterPro DOMAIN/s: Wall-associated kinase (InterPro:IPR013695)…	-8.36588	2.47551	8.04345e-06	0.00844139
66804	1.1.30	PS.lightreaction.state transition	|MERCATOR: (gnl|cdd|38301 : 58.1) no description available & (loc_os11g39490.1 : 53.1) no description available & (at4g01330 : 46.6) Protein kinase superfamily protein; FUNCTIONS IN: protein serine/threonine kinase activity, protein kinase activity, kinase activity, ATP binding; INVOLVED IN: protein amino acid phosphorylation; EXPRESSED IN: 22 plant structures; EXPRESSED DURING: 13 growth stages;…	-3.07666	4.69388	0.00020553	0.0318449
70012	1.1.30	PS.lightreaction.state transition	|MERCATOR: (loc_os11g17380.1 : 194.0) no description available & (at5g53890 : 58.2) Encodes a leucine-rich repeat receptor kinase (LRR-RK) involved in the perception of phytosulfokine (PSK), which is a 5-aa tyrosine-sulfated peptide that primarily promotes cellular proliferation.; phytosylfokine-alpha receptor 2 (PSKR2); FUNCTIONS IN: peptide receptor activity, protein serine/threonine kinase act…	-3.48942	3.53019	0.000155313	0.0281664
53049	1.1.40	PS.lightreaction.cyclic electron flow-chlororespiration	|MERCATOR: (loc_os03g63010.2 : 50.4) no description available & (gnl|cdd|36433 : 48.5) no description available & (at4g22260 : 45.4) Similar to mitochondrial alternative oxidase. im mutants have a variegated phenotype and fail to differentiate chloroplasts in the majority of their cells under high light intensity continuous illumination. The white tissues of immutans accumulate phytoene, a non-co…	-10.6806	2.49042	1.72112e-05	0.0110369
49491	1.3	PS.calvin cycle	|MERCATOR: (loc_os03g19380.1 : 101.0) no description available & (at2g47400 : 55.8) CP12-1 encodes a small peptide found in the chloroplast stroma. It belongs to the CP12 gene family thought to be involved in the formation of a supramolecular complex with glyceraldehyde-3-phosphate dehydrogenase (GAPDH) and phosphoribulokinase (PRK) embedded in the Calvin cycle.; CP12 domain-containing protein 1 …	6.07765	2.02	6.71189e-06	0.00798686
47547	2.1.3.2	major CHO metabolism.synthesis.fructans.6-SFT	|MERCATOR: (original description: no original description)||TAGI: CV761839;homologue to UniRef100_Q8W431 Cluster: Sucrose:fructan 6-fructosyltransferase; n=5; Triticeae;Rep: Sucrose:fructan 6-fructosyltransferase - Triticum aestivum (Wheat), partial (37%);Evalue=7E-144;%ident=99.64|MAPMANSTORE: very weakly similar to (82.0) AT1G62660 ; Symbols: ; beta-fructosidase (BFRUCT3) / beta-fructofuranosid…	6.26508	0.443711	0.000177722	0.0298063
38812	2.2.1.3.2	major CHO metabolism.degradation.sucrose.invertases.cell wall	|MERCATOR: (original description: no original description)||TAGI: CK207454;homologue to UniRef100_Q575T1 Cluster: Acid beta-fructofuranosidase precursor; n=1; Triticum aestivum;Rep: Acid beta-fructofuranosidase precursor - Triticum aestivum (Wheat), partial (42%);Evalue=0;%ident=97.64|MAPMANSTORE: moderately similar to ( 258) AT1G62660 ; Symbols: ; beta-fructosidase (BFRUCT3) / beta-fructofuranos…	5.1922	1.65424	7.453e-05	0.0223253
58938	3.1.2.1	minor CHO metabolism.raffinose family.raffinose synthases.known	|MERCATOR: (loc_os01g07530.1 : 364.0) no description available & (at5g40390 : 263.0) Encodes a protein which might be involved in the formation of verbascose. A T-DNA insertion mutant was shown to have a decreased amount of verbascose (as well as mannitol) whereas the levels of raffinose and stachyose remained unchanged.; seed imbibition 1-like (SIP1); FUNCTIONS IN: hydrolase activity, hydrolyzin…	3.71277	0.728504	0.000130653	0.0260479
63678	3.5	minor CHO metabolism.others	|MERCATOR: (loc_os04g51390.2 : 320.0) no description available & (at5g57330 : 294.0) Galactose mutarotase-like superfamily protein; FUNCTIONS IN: isomerase activity, carbohydrate binding, aldose 1-epimerase activity, catalytic activity; INVOLVED IN: galactose metabolic process, carbohydrate metabolic process; LOCATED IN: cellular_component unknown; EXPRESSED IN: 26 plant structures; EXPRESSED DUR…	-2.40534	4.18809	0.000166206	0.0291752
35102	3.6	minor CHO metabolism.callose	|MERCATOR: (loc_os01g48200.1 : 636.0) no description available & (at4g03550 : 496.0) Encodes a callose synthase that is required for wound and papillary callose formation in response to fungal pathogens Erysiphe and Blumeria. Mutants are resistant to P. parasitica and exhibit an exaggerated PR1 response.Contributes to PAMP-induced basal defense.; glucan synthase-like 5 (GSL05); FUNCTIONS IN: tran…	-8.30128	0.122575	3.20564e-05	0.0141742
37007	3.6	minor CHO metabolism.callose	|MERCATOR: (loc_os01g55040.1 : 329.0) no description available & (at4g04970 : 328.0) encodes a gene similar to callose synthase; glucan synthase-like 1 (GSL1); FUNCTIONS IN: transferase activity, transferring glycosyl groups, 1,3-beta-glucan synthase activity; INVOLVED IN: reproduction, 1,3-beta-glucan biosynthetic process, pollen development; LOCATED IN: 1,3-beta-glucan synthase complex, plasma …	-6.941	-0.113867	0.00028231	0.0360119
40809	4.1.8	glycolysis.cytosolic branch.glyceraldehyde 3-phosphate dehydrogenase (GAP-DH)	|MERCATOR: no hits & (original description: no original description)||TAGI: TC417401;homologue to UniRef100_A5YVV3 Cluster: Glyceraldehyde-3-phosphate dehydrogenase; n=3; Triticum;Rep: Glyceraldehyde-3-phosphate dehydrogenase - Triticum aestivum (Wheat), partial (50%);Evalue=1E-110;%ident=100|MAPMANSTORE: moderately similar to ( 217) AT3G04120 ; Symbols: GAPC, GAPC-1, GAPC1 ; GAPC1 (GLYCERALDEHYD…	-7.30307	-0.86885	4.71347e-06	0.00692179
45558	4.1.8	glycolysis.cytosolic branch.glyceraldehyde 3-phosphate dehydrogenase (GAP-DH)	|MERCATOR: (original description: no original description)||TAGI: TC417401;homologue to UniRef100_A5YVV3 Cluster: Glyceraldehyde-3-phosphate dehydrogenase; n=3; Triticum;Rep: Glyceraldehyde-3-phosphate dehydrogenase - Triticum aestivum (Wheat), partial (50%);Evalue=1E-131;%ident=99.61|MAPMANSTORE: moderately similar to ( 217) AT3G04120 ; Symbols: GAPC, GAPC-1, GAPC1 ; GAPC1 (GLYCERALDEHYDE-3-PHOS…	-8.11539	-0.140078	2.14076e-06	0.00482946
36543	9.7	mitochondrial electron transport / ATP synthesis.cytochrome c oxidase	|MERCATOR: (atmg01360 : 231.0) cytochrome c oxidase subunit 1; cytochrome oxidase (COX1); CONTAINS InterPro DOMAIN/s: Cytochrome c oxidase, subunit I bacterial type (InterPro:IPR014241), Cytochrome c oxidase, subunit I (InterPro:IPR000883). & (p60621|cox1_rapsa : 231.0) Cytochrome c oxidase subunit 1 (EC 1.9.3.1) (Cytochrome c oxidase polypeptide I) - Raphanus sativus (Radish) & (loc_osm1g00550.1…	9.92485	0.0860059	0.00027028	0.0352235
37090	9.7	mitochondrial electron transport / ATP synthesis.cytochrome c oxidase	|MERCATOR: (q05143|cox1_prowi : 192.0) Cytochrome c oxidase subunit 1 (EC 1.9.3.1) (Cytochrome c oxidase polypeptide I) - Prototheca wickerhamii & (atmg01360 : 186.0) cytochrome c oxidase subunit 1; cytochrome oxidase (COX1); CONTAINS InterPro DOMAIN/s: Cytochrome c oxidase, subunit I bacterial type (InterPro:IPR014241), Cytochrome c oxidase, subunit I (InterPro:IPR000883). & (ipr000883 : 127.951…	10.1429	0.27443	0.000182894	0.0301696
414214	9.7	mitochondrial electron transport / ATP synthesis.cytochrome c oxidase	|MERCATOR: (p26857|cox2_marpo : 145.0) Cytochrome c oxidase subunit 2 (EC 1.9.3.1) (Cytochrome c oxidase polypeptide II) - Marchantia polymorpha (Liverwort) & (atmg00160 : 134.0) cytochrome c oxidase subunit 2; cytochrome oxidase 2 (COX2); FUNCTIONS IN: cytochrome-c oxidase activity; INVOLVED IN: respiratory electron transport chain; LOCATED IN: mitochondrion, chloroplast, mitochondrial respirato…	9.24501	-0.518165	0.000412501	0.042856
41026	9.9	mitochondrial electron transport / ATP synthesis.F1-ATPase	|MERCATOR: (p19023|atpbm_maize : 114.0) ATP synthase subunit beta, mitochondrial precursor (EC 3.6.3.14) - Zea mays (Maize) & (loc_os05g47980.1 : 106.0) no description available & (at5g08680 : 61.2) Encodes the mitochondrial ATP synthase beta-subunit. This subunit is encoded by a multigene family of three members (At5g08670, At5g08680, At5g08690) that shared 98% sequence identity at the amino aci…	6.19864	0.0577972	0.000214026	0.0322964
64724	9.9	mitochondrial electron transport / ATP synthesis.F1-ATPase	|MERCATOR: (loc_os01g56360.1 : 289.0) no description available & (at5g53390 : 202.0) O-acyltransferase (WSD1-like) family protein; CONTAINS InterPro DOMAIN/s: O-acyltransferase, WSD1, C-terminal (InterPro:IPR009721), O-acyltransferase, WSD1, N-terminal (InterPro:IPR004255); BEST Arabidopsis thaliana protein match is: O-acyltransferase (WSD1-like) family protein (TAIR:AT2G38995.2); Has 1220 Blast …	-3.06193	0.925187	8.21013e-05	0.0235392
404611	9.9	mitochondrial electron transport / ATP synthesis.F1-ATPase	|MERCATOR: (ipr000568 : 103.353966) ATPase, F0 complex, subunit A & (p26853|atp6_marpo : 71.6) ATP synthase a chain (EC 3.6.3.14) (ATPase protein 6) - Marchantia polymorpha (Liverwort) & (atmg00410 : 66.6) ATPase subunit 6; ATPase subunit 6-1 (ATP6-1); CONTAINS InterPro DOMAIN/s: ATPase, F0 complex, subunit A (InterPro:IPR000568); BEST Arabidopsis thaliana protein match is: ATPase, F0 complex, su…	9.56636	-0.238461	0.000300867	0.0370448
69688	10.2	cell wall.cellulose synthesis	|MERCATOR: (loc_os06g42020.1 : 253.0) no description available & (at5g03760 : 239.0) encodes a beta-mannan synthase that is required for agrobacterium-mediated plant genetic transformation involves a complex interaction between the bacterium and the host plant. 3 UTR is involved in transcriptional regulation and the gene is expressed in the elongation zone of the root.; ATCSLA09; CONTAINS InterPr…	-3.59606	4.33697	1.09606e-05	0.00904006
49343	10.5.3	cell wall.cell wall proteins.LRR	|MERCATOR: (loc_os01g06730.1 : 117.0) no description available & (at1g17750 : 59.7) Encodes PEPR2, a plasma membrane leucine-rich repeat receptor kinase functioning as a receptor for the Pep1 and Pep2 peptides. Pep1 and Pep2 are amino acids that induce the transcription of defense-related genes.; PEP1 receptor 2 (PEPR2); FUNCTIONS IN: protein serine/threonine kinase activity, peptide binding, kin…	-10.7159	0.655051	3.66201e-05	0.0147977
66184	10.7	cell wall.modification	|MERCATOR: (q10s70|exla1_orysa : 298.0) Expansin-like A1 precursor (OsEXLA1) (OsEXPL1) (OsaEXPb2.1) - Oryza sativa (Rice) & (loc_os03g04020.1 : 298.0) no description available & (at3g45970 : 222.0) member of EXPANSIN-LIKE. Naming convention from the Expansin Working Group (Kende et al, 2004. Plant Mol Bio); expansin-like A1 (EXLA1); INVOLVED IN: unidimensional cell growth, plant-type cell wall lo…	2.58623	2.25077	0.000506861	0.0454548
67103	11.1.8	lipid metabolism.FA synthesis and FA elongation.acyl coa ligase	|MERCATOR: (loc_os04g58710.1 : 667.0) no description available & (at3g48990 : 578.0) AMP-dependent synthetase and ligase family protein; FUNCTIONS IN: catalytic activity, AMP binding; INVOLVED IN: response to cadmium ion; LOCATED IN: apoplast, chloroplast; EXPRESSED IN: 26 plant structures; EXPRESSED DURING: 15 growth stages; CONTAINS InterPro DOMAIN/s: AMP-binding, conserved site (InterPro:IPR02…	2.9289	3.81666	1.08761e-05	0.00904006
53228	11.3.2	lipid metabolism.Phospholipid synthesis.choline kinase	|MERCATOR: no hits & (original description: no original description)||TAGI: TC417126;similar to UniRef100_A7PF15 Cluster: Chromosome chr11 scaffold_13, whole genome shotgun sequence; n=1; Vitis vinifera;Rep: Chromosome chr11 scaffold_13, whole genome shotgun sequence - Vitis vinifera (Grape), partial (53%);Evalue=1E-141;%ident=98.26|MAPMANSTORE: moderately similar to ( 234) AT2G26830 ; Symbols: e…	-2.01803	-0.141568	0.000283838	0.0361302
56774	11.9.3.3	lipid metabolism.lipid degradation.lysophospholipases.glycerophosphodiester phosphodiesterase	|MERCATOR: (loc_os01g02680.1 : 257.0) no description available & (at4g32300 : 58.9) S-domain-2 5 (SD2-5); FUNCTIONS IN: carbohydrate binding, protein kinase activity, kinase activity; INVOLVED IN: protein amino acid autophosphorylation; LOCATED IN: plasma membrane; EXPRESSED IN: 25 plant structures; EXPRESSED DURING: 15 growth stages; CONTAINS InterPro DOMAIN/s: Curculin-like (mannose-binding) le…	-3.83298	2.25882	2.88968e-05	0.0138083
45507	11.9	lipid metabolism.lipid degradation	|MERCATOR: (loc_os02g40840.1 : 117.0) no description available & (at3g23410 : 94.4) Encodes a fatty alcohol oxidase.; fatty alcohol oxidase 3 (FAO3); CONTAINS InterPro DOMAIN/s: FAD-dependent pyridine nucleotide-disulphide oxidoreductase (InterPro:IPR013027), Glucose-methanol-choline oxidoreductase, N-terminal (InterPro:IPR000172), Glucose-methanol-choline oxidoreductase, C-terminal (InterPro:IPR…	2.55923	-0.671433	0.000174619	0.0295311
64683	12.2.1	N-metabolism.ammonia metabolism.glutamate synthase	|MERCATOR: (original description: no original description)||TAGI: CD916566;similar to UniRef100_Q8P6H5 Cluster: Phage-related tail protein; n=1; Xanthomonas campestris pv. campestris;Rep: Phage-related, partial (3%);Evalue=0;%ident=98.97|MAPMANSTORE: similar to UniRef100_Q8P6H5 Cluster: Phage-related tail protein; n=1; Xanthomonas campestris pv. campestris;Rep: Phage-related, partial (3%)||BREAD.…	-2.34013	1.97679	0.000449889	0.0433439
26575	13.1.2.2.1	amino acid metabolism.synthesis.glutamate family.proline.delta 1-pyrroline-5-carboxylate synthetase	|MERCATOR: (loc_os01g62900.1 : 52.4) no description available & (gnl|cdd|36433 : 42.3) no description available & (o65361|p5cs_mescr : 42.0) Delta 1-pyrroline-5-carboxylate synthetase (P5CS) [Includes: Glutamate 5-kinase (EC 2.7.2.11) (Gamma-glutamyl kinase) (GK); Gamma-glutamyl phosphate reductase (GPR) (EC 1.2.1.41) (Glutamate-5-semialdehyde dehydrogenase) (Glutamyl-gamma- & (at2g39800 : 41.6) …	5.89009	-0.435707	5.40749e-05	0.0190812
25499	13.1.3.4.12	amino acid metabolism.synthesis.aspartate family.methionine.homocysteine S-methyltransferase	|MERCATOR: (original description: no original description)||TAGI: TC418511;similar to UniRef100_A7QS31 Cluster: Chromosome undetermined scaffold_155, whole genome shotgun sequence; n=1; Vitis vinifera;Rep: Chromosome undetermined scaffold_155, whole genome shotgun sequence - Vitis vinifera (Grape), partial (52%);Evalue=1E-110;%ident=100|MAPMANSTORE: moderately similar to ( 251) AT2G41040 ; Symbol…	-9.97892	-0.0572241	9.96104e-05	0.0241662
10113	13.1.6.1.1	amino acid metabolism.synthesis.aromatic aa.chorismate.3-deoxy-D-arabino-heptulosonate 7-phosphate synthase	|MERCATOR: (original description: no original description)||TAGI: TC396011;similar to UniRef100_A0D692 Cluster: Chromosome undetermined scaffold_392, whole genome shotgun sequence; n=1; Paramecium tetraurelia;Rep: Chromosome undetermined scaffold_392, whole genome shotgun sequence - Paramecium tetraurelia, partial (6%);Evalue=3E-169;%ident=99.69|MAPMANSTORE: similar to UniRef100_A0D692 Cluster: C…	-8.7468	-1.20918	2.11557e-05	0.0121311
53424	13.1.6.5	amino acid metabolism.synthesis.aromatic aa.tryptophan	|MERCATOR: (loc_os04g59520.1 : 79.0) no description available & (at1g22610 : 63.9) C2 calcium/lipid-binding plant phosphoribosyltransferase family protein; FUNCTIONS IN: molecular_function unknown; INVOLVED IN: biological_process unknown; LOCATED IN: chloroplast; EXPRESSED IN: 22 plant structures; EXPRESSED DURING: 13 growth stages; CONTAINS InterPro DOMAIN/s: C2 membrane targeting protein (Inter…	-9.41334	1.08019	0.000148575	0.0276796
65861	13.1.6.5	amino acid metabolism.synthesis.aromatic aa.tryptophan	|MERCATOR: (loc_os04g58720.1 : 637.0) no description available & (at4g11610 : 568.0) C2 calcium/lipid-binding plant phosphoribosyltransferase family protein; CONTAINS InterPro DOMAIN/s: C2 membrane targeting protein (InterPro:IPR018029), C2 calcium/lipid-binding domain, CaLB (InterPro:IPR008973), Phosphoribosyltransferase C-terminal (InterPro:IPR013583), C2 calcium-dependent membrane targeting (I…	-3.0189	1.69488	1.41809e-05	0.0101645
147983	13.1.6.5	amino acid metabolism.synthesis.aromatic aa.tryptophan	|MERCATOR: (at4g11610 : 115.0) C2 calcium/lipid-binding plant phosphoribosyltransferase family protein; CONTAINS InterPro DOMAIN/s: C2 membrane targeting protein (InterPro:IPR018029), C2 calcium/lipid-binding domain, CaLB (InterPro:IPR008973), Phosphoribosyltransferase C-terminal (InterPro:IPR013583), C2 calcium-dependent membrane targeting (InterPro:IPR000008); BEST Arabidopsis thaliana protein …	-8.89687	-1.0736	0.000584639	0.0488218
74015	13.2.3.2	amino acid metabolism.degradation.aspartate family.threonine	|MERCATOR: (original description: no original description)||BREAD.WHEAT.TIGR: CJ725837; Putative glutamate decarboxylase 1 [Triticum aestivum (Wheat)]; Evalue=9E-113; %ident=98.25||BRACHYPODIUM GENOME: Bradi3g10330.2 ; moderately similar to ( 500) AT1G67280 | Symbols: | lactoylglutathione lyase, putative / glyoxalase I, putative | chr1:25188563-25190134 REVERSEmoderately similar to ( 414) LGUL_OR…	3.3324	1.18762	5.31828e-05	0.0190812
17907	16.1.1.2	secondary metabolism.isoprenoids.non-mevalonate pathway.DXR	|MERCATOR: (original description: no original description)||TAGI: TC415036;;Evalue=4E-80;%ident=94.42|MAPMANSTORE: moderately similar to ( 202) AT5G62790 ; Symbols: DXR, PDE129 ; DXR (1-DEOXY-D-XYLULOSE 5-PHOSPHATE REDUCTOISOMERASE); 1-deoxy-D-xylulose-5-phosphate reductoisomerase ; chr5:25214358-25217292 REVERSEmoderately similar to ( 258) DXR_ORYSA 1-deoxy-D-xylulose 5-phosphate reductoisomeras…	2.30128	2.11661	0.000150876	0.0277036
51811	16.1.1.6	secondary metabolism.isoprenoids.non-mevalonate pathway.HDS	|MERCATOR: (original description: no original description)||TAGI: CJ923748;similar to UniRef100_Q672R6 Cluster: Hydroxymethylbutenyl 4-diphosphate synthase; n=1; Zea mays;Rep: Hydroxymethylbutenyl 4-diphosphate synthase - Zea mays (Maize), partial (3%);Evalue=0;%ident=98.51|MAPMANSTORE: similar to UniRef100_Q672R6 Cluster: Hydroxymethylbutenyl 4-diphosphate synthase; n=1; Zea mays;Rep: Hydroxymet…	-8.83841	-1.12339	0.000412197	0.042856
44373	16.1.1.10	secondary metabolism.isoprenoids.non-mevalonate pathway.geranylgeranyl pyrophosphate synthase	|MERCATOR: (original description: no original description)||TAGI: TC456045;similar to UniRef100_A3Z1J3 Cluster: Geranylgeranyl pyrophosphate synthase; n=1; Synechococcus sp. WH 5701;Rep: Geranylgeranyl pyrophosphate synthase - Synechococcus sp. WH 5701, partial (12%);Evalue=9E-179;%ident=96.34|MAPMANSTORE: weakly similar to ( 112) loc_os07g39270 12007.m28997 protein geranylgeranyl pyrophosphate s…	3.89667	-1.31693	0.000353549	0.0401
51473	16.1.4.6	secondary metabolism.isoprenoids.carotenoids.carotenoid beta ring hydroxylase	|MERCATOR: (loc_os03g03370.1 : 47.0) no description available & (gnl|cdd|38301 : 46.5) no description available & (at4g25700 : 43.9) Converts beta-carotene to zeaxanthin via cryptoxanthin.; beta-hydroxylase 1 (BETA-OHASE 1); FUNCTIONS IN: carotene beta-ring hydroxylase activity; INVOLVED IN: xanthophyll biosynthetic process, carotene metabolic process; LOCATED IN: endoplasmic reticulum, chloropla…	3.83467	-0.0644148	0.000145849	0.0275042
203801	16.1.5	secondary metabolism.isoprenoids.terpenoids	|MERCATOR: (loc_os04g27340.1 : 558.0) no description available & (p93665|dcs1_goshi : 300.0) (+)-delta-cadinene synthase (EC 4.2.3.13) (D-cadinene synthase) - Gossypium hirsutum (Upland cotton) & (at4g16730 : 246.0) In the Col ecotype, no functional protein is encoded at this locus due to the presence of a two-base (AT) insertion 184 nucleotides downstream of the start codon leading to a frame sh…	-10.9148	0.849939	7.38639e-05	0.0222364
9217	16.2.1.3	secondary metabolism.phenylpropanoids.lignin biosynthesis.4CL	|MERCATOR: (loc_os03g05780.1 : 244.0) no description available & (at4g05160 : 121.0) Encodes a peroxisomal protein involved in the activation of fatty acids through esterification with CoA. At4g05160 preferentially activates fatty acids with medium chain length (C6:0 and C7:0) as well as even-numbered long-chain fatty acids (C14:0, C16:0 and C18:0). At4g05160 was also able to catalyze the convers…	7.17362	-0.519945	3.08418e-05	0.0140228
52741	16.2.1.4	secondary metabolism.phenylpropanoids.lignin biosynthesis.HCT	|MERCATOR: (loc_os09g25460.1 : 300.0) no description available & (at5g48930 : 123.0) At5g48930 has been shown to encode for the hydroxycinnamoyl-Coenzyme A shikimate/quinate hydroxycinnamoyltransferase (HCT) both synthesizing and catabolizing the hydroxycinnamoylesters (coumaroyl/caffeoyl shikimate and quinate) involved in the phenylpropanoid pathway. Influence on the accumulation of flavonoids w…	4.86895	0.52168	3.54042e-05	0.0146003
49720	16.2	secondary metabolism.phenylpropanoids	|MERCATOR: (loc_os06g41800.1 : 89.0) no description available & (at2g33600 : 73.9) NAD(P)-binding Rossmann-fold superfamily protein; FUNCTIONS IN: coenzyme binding, binding, cinnamoyl-CoA reductase activity, catalytic activity; INVOLVED IN: lignin biosynthetic process, cellular metabolic process, metabolic process; EXPRESSED IN: 21 plant structures; EXPRESSED DURING: 13 growth stages; CONTAINS In…	-3.99324	1.43588	9.18225e-05	0.0237276
53897	16.2	secondary metabolism.phenylpropanoids	|MERCATOR: (loc_os07g04970.1 : 142.0) no description available & (at2g39980 : 70.9) HXXXD-type acyl-transferase family protein; FUNCTIONS IN: transferase activity, transferring acyl groups other than amino-acyl groups, transferase activity; INVOLVED IN: response to karrikin; LOCATED IN: cellular_component unknown; EXPRESSED IN: 17 plant structures; EXPRESSED DURING: 10 growth stages; CONTAINS Int…	6.96458	-0.741854	8.41209e-06	0.00844139
56899	16.2	secondary metabolism.phenylpropanoids	|MERCATOR: (loc_os06g06180.1 : 280.0) no description available & (at1g28680 : 193.0) HXXXD-type acyl-transferase family protein; FUNCTIONS IN: transferase activity, transferring acyl groups other than amino-acyl groups, transferase activity; INVOLVED IN: biological_process unknown; LOCATED IN: cellular_component unknown; EXPRESSED IN: 22 plant structures; EXPRESSED DURING: 13 growth stages; CONTA…	3.71492	0.865355	0.000128885	0.0257943
58859	16.2	secondary metabolism.phenylpropanoids	|MERCATOR: (loc_os09g31490.1 : 393.0) no description available & (at2g33590 : 256.0) NAD(P)-binding Rossmann-fold superfamily protein; FUNCTIONS IN: coenzyme binding, binding, cinnamoyl-CoA reductase activity, catalytic activity; INVOLVED IN: response to cadmium ion, lignin biosynthetic process; LOCATED IN: cellular_component unknown; EXPRESSED IN: 23 plant structures; EXPRESSED DURING: 13 growth…	-5.52638	1.5332	1.25945e-05	0.00972184
49494	16.4.1	secondary metabolism.N misc.alkaloid-like	|MERCATOR: (loc_os03g53950.1 : 162.0) no description available & (at1g08470 : 103.0) Although this enzyme is predicted to encode a strictosidine synthase (SS), it lacks a conserved catalytic glutamate residue found in active SS enzymes and it is not expected to have SS activity.; strictosidine synthase-like 3 (SSL3); FUNCTIONS IN: strictosidine synthase activity; INVOLVED IN: alkaloid biosyntheti…	5.69231	-1.10728	0.000254252	0.0343234
55920	16.4.1	secondary metabolism.N misc.alkaloid-like	|MERCATOR: (loc_os10g37899.1 : 332.0) no description available & (at4g16770 : 254.0) 2-oxoglutarate (2OG) and Fe(II)-dependent oxygenase superfamily protein; FUNCTIONS IN: oxidoreductase activity, acting on paired donors, with incorporation or reduction of molecular oxygen, 2-oxoglutarate as one donor, and incorporation of one atom each of oxygen into both donors, oxidoreductase activity, iron io…	-6.23139	1.25053	1.50038e-06	0.00404217
57474	16.5.1.1.1.13	secondary metabolism.sulfur-containing.glucosinolates.synthesis.aliphatic.2-oxoglutarate-dependent dioxygenase	|MERCATOR: (loc_os08g30100.1 : 169.0) no description available & (at2g30830 : 131.0) encodes a protein whose sequence is similar to 2-oxoglutarate-dependent dioxygenase; 2-oxoglutarate (2OG) and Fe(II)-dependent oxygenase superfamily protein; CONTAINS InterPro DOMAIN/s: Oxoglutarate/iron-dependent oxygenase (InterPro:IPR005123); BEST Arabidopsis thaliana protein match is: 2-oxoglutarate (2OG) and…	4.99179	0.284646	9.58699e-05	0.024051
50722	16.5.1.3.2	secondary metabolism.sulfur-containing.glucosinolates.degradation.nitrilespecifier protein	|MERCATOR: (loc_os09g07460.1 : 60.5) no description available & (at5g48180 : 48.9) Encodes a nitrile-specifier protein NSP5. NSP5 is one out of five (At3g16400/NSP1, At2g33070/NSP2, At3g16390/NSP3, At3g16410/NSP4 and At5g48180/NSP5) A. thaliana epithiospecifier protein (ESP) homologues that promote simple nitrile, but not epithionitrile or thiocyanate formation.; nitrile specifier protein 5 (NSP5…	3.33323	-0.0731588	3.24503e-06	0.00576177
29650	16.8.4	secondary metabolism.flavonoids.flavonols	|MERCATOR: (loc_os05g08480.1 : 238.0) no description available & (at2g36750 : 105.0) UDP-glucosyl transferase 73C1 (UGT73C1); CONTAINS InterPro DOMAIN/s: UDP-glucuronosyl/UDP-glucosyltransferase (InterPro:IPR002213); BEST Arabidopsis thaliana protein match is: don-glucosyltransferase 1 (TAIR:AT2G36800.1); Has 7705 Blast hits to 7611 proteins in 415 species: Archae - 0; Bacteria - 205; Metazoa - 2…	3.46549	0.843807	8.96928e-05	0.0236979
57907	17.2.3	hormone metabolism.auxin.induced-regulated-responsive-activated	|MERCATOR: (loc_os06g45970.1 : 54.3) no description available & (gnl|cdd|38301 : 51.9) no description available & (at1g56150 : 41.6) SAUR-like auxin-responsive protein family ; CONTAINS InterPro DOMAIN/s: Auxin responsive SAUR protein (InterPro:IPR003676); BEST Arabidopsis thaliana protein match is: SAUR-like auxin-responsive protein family (TAIR:AT3G12830.1); Has 1156 Blast hits to 1154 proteins…	-2.56454	0.662387	0.000452811	0.0433439
57298	17.3.2.1	hormone metabolism.brassinosteroid.signal transduction.BRI	|MERCATOR: (loc_os11g29790.1 : 95.9) no description available & (at2g34930 : 67.4) disease resistance family protein / LRR family protein; INVOLVED IN: signal transduction, defense response to fungus, defense response; LOCATED IN: cell wall; EXPRESSED IN: 10 plant structures; EXPRESSED DURING: 7 growth stages; CONTAINS InterPro DOMAIN/s: Leucine-rich repeat-containing N-terminal domain, type 2 (I…	-9.45366	1.11557	0.000164635	0.0290205
59584	17.3.2.1	hormone metabolism.brassinosteroid.signal transduction.BRI	|MERCATOR: (loc_os10g33040.1 : 138.0) no description available & (at2g25790 : 77.4) Leucine-rich receptor-like protein kinase family protein; FUNCTIONS IN: protein serine/threonine kinase activity, kinase activity, ATP binding; INVOLVED IN: transmembrane receptor protein tyrosine kinase signaling pathway, protein amino acid phosphorylation; LOCATED IN: plasma membrane; EXPRESSED IN: 23 plant stru…	-2.31647	2.57818	0.000254847	0.0343268
158832	17.3.2.1	hormone metabolism.brassinosteroid.signal transduction.BRI	|MERCATOR: (loc_os10g02970.1 : 80.1) no description available & (at5g56040 : 51.2) Leucine-rich receptor-like protein kinase family protein; FUNCTIONS IN: protein serine/threonine kinase activity, kinase activity, ATP binding; INVOLVED IN: transmembrane receptor protein tyrosine kinase signaling pathway, protein amino acid phosphorylation; LOCATED IN: endomembrane system; EXPRESSED IN: 22 plant s…	-5.72139	-0.815997	0.000459565	0.0437751
30800	17.3.2.99	hormone metabolism.brassinosteroid.signal transduction.other	|MERCATOR: (loc_os10g02970.1 : 95.5) no description available & (at5g25910 : 85.5) putative disease resistance protein induced by chitin oligomers.; receptor like protein 52 (RLP52); FUNCTIONS IN: kinase activity; INVOLVED IN: signal transduction, defense response to fungus, response to chitin, defense response; LOCATED IN: endomembrane system; EXPRESSED IN: stem, stamen; EXPRESSED DURING: 4 anth…	-7.5712	1.30077	0.000164843	0.0290205
47266	17.5.2	hormone metabolism.ethylene.signal transduction	|MERCATOR: (loc_os08g30520.1 : 110.0) no description available & (ipr004158 : 56.97684) Protein of unknown function DUF247, plant & (at4g31980 : 55.8) unknown protein; CONTAINS InterPro DOMAIN/s: Protein of unknown function DUF247, plant (InterPro:IPR004158), Protein of unknown function DUF862, eukaryotic (InterPro:IPR008580); BEST Arabidopsis thaliana protein match is: Plant protein of unknown f…	-5.90233	-0.013138	0.000402144	0.0423274
42094	17.6.2	hormone metabolism.gibberelin.signal transduction	|MERCATOR: (q9st59|rht1_wheat : 149.0) DELLA protein RHT-1 (Reduced height protein 1) (Protein Rht-B1/Rht-D1) - Triticum aestivum (Wheat) & (loc_os03g49990.1 : 120.0) no description available & (at2g01570 : 80.9) Member of the VHIID/DELLA regulatory family. Contains homopolymeric serine and threonine residues, a putative nuclear localization signal, leucine heptad repeats, and an LXXLL motif. Put…	4.59867	0.290149	0.000414972	0.042856
37797	17.7.1.5	hormone metabolism.jasmonate.synthesis-degradation.12-Oxo-PDA-reductase	|MERCATOR: (loc_os01g27230.1 : 136.0) no description available & (at1g09400 : 129.0) FMN-linked oxidoreductases superfamily protein; FUNCTIONS IN: oxidoreductase activity, FMN binding, catalytic activity; INVOLVED IN: metabolic process; LOCATED IN: mitochondrion; CONTAINS InterPro DOMAIN/s: Aldolase-type TIM barrel (InterPro:IPR013785), NADH:flavin oxidoreductase/NADH oxidase, N-terminal (InterPr…	4.17894	-1.0832	0.000226243	0.0331534
54038	17.7.1.5	hormone metabolism.jasmonate.synthesis-degradation.12-Oxo-PDA-reductase	|MERCATOR: (loc_os01g27230.1 : 184.0) no description available & (at1g76690 : 176.0) Encodes one of the closely related 12-oxophytodienoic acid reductases. This enzyme is not expected to participate in jasmonic acid biosynthesis because during in vitro assays, it shows very little activity with the naturally occurring OPDA isomer. Shows activity towards 2,4,6-trinitrotoluene. Expressed predominat…	5.80237	0.249168	8.97827e-06	0.00858051
58551	19.11	tetrapyrrole synthesis.magnesium protoporphyrin IX methyltransferase	|MERCATOR: (loc_os06g04150.1 : 494.0) no description available & (at4g25080 : 338.0) Encodes a protein with methyltransferase activity responsible for the methylation of magnesium protoporphyrin IX. Mutants defective in this gene are affected in chlorophyll biosynthesis and show a reduction in the accumulation of a number of major thylakoid-associated proteins including components of PSI (LHCI), …	2.27103	3.52974	0.000156835	0.028272
7442	20.1.2	stress.biotic.receptors	|MERCATOR: (loc_os04g53496.1 : 139.0) no description available & (gnl|cdd|38301 : 58.1) no description available & (at3g44670 : 46.6) Disease resistance protein (TIR-NBS-LRR class) family; FUNCTIONS IN: transmembrane receptor activity, nucleoside-triphosphatase activity, nucleotide binding, ATP binding; INVOLVED IN: defense response to bacterium, defense response; LOCATED IN: intrinsic to membran…	-10.111	0.0663813	9.25961e-05	0.0237423
7220	20.1.7	stress.biotic.PR-proteins	|MERCATOR: (loc_os11g10570.1 : 97.4) no description available & (at2g14080 : 63.9) Disease resistance protein (TIR-NBS-LRR class) family; FUNCTIONS IN: transmembrane receptor activity, nucleoside-triphosphatase activity, nucleotide binding, ATP binding; INVOLVED IN: signal transduction, apoptosis, defense response, innate immune response; LOCATED IN: intrinsic to membrane, endomembrane system; EX…	-8.98927	-0.991001	0.000511611	0.0455454
35077	20.1.7	stress.biotic.PR-proteins	|MERCATOR: (loc_os05g40160.1 : 96.7) no description available & (gnl|cdd|36433 : 45.8) no description available & (at3g46730 : 42.4) NB-ARC domain-containing disease resistance protein; FUNCTIONS IN: ATP binding; INVOLVED IN: defense response, apoptosis; LOCATED IN: endomembrane system; CONTAINS InterPro DOMAIN/s: NB-ARC (InterPro:IPR002182), Disease resistance protein (InterPro:IPR000767); BEST …	-9.5707	-0.455515	0.000240954	0.0334277
35669	20.1.7	stress.biotic.PR-proteins	|MERCATOR: (loc_os11g11580.1 : 109.0) no description available & (gnl|cdd|36433 : 54.3) no description available & (at1g50180 : 49.7) NB-ARC domain-containing disease resistance protein; FUNCTIONS IN: ATP binding; INVOLVED IN: apoptosis, defense response; LOCATED IN: cellular_component unknown; EXPRESSED IN: shoot; CONTAINS InterPro DOMAIN/s: NB-ARC (InterPro:IPR002182), Disease resistance protei…	-8.78212	-1.1729	0.00044295	0.0433439
40025	20.1.7	stress.biotic.PR-proteins	|MERCATOR: (loc_os11g10760.1 : 197.0) no description available & (at3g14460 : 61.6) LRR and NB-ARC domains-containing disease resistance protein; FUNCTIONS IN: ATP binding; INVOLVED IN: apoptosis, defense response; CONTAINS InterPro DOMAIN/s: NB-ARC (InterPro:IPR002182), Leucine-rich repeat (InterPro:IPR001611), Disease resistance protein (InterPro:IPR000767); BEST Arabidopsis thaliana protein ma…	-10.6947	0.633227	8.03407e-05	0.0233045
40366	20.1.7	stress.biotic.PR-proteins	|MERCATOR: (loc_os11g35840.1 : 214.0) no description available & (at2g34930 : 115.0) disease resistance family protein / LRR family protein; INVOLVED IN: signal transduction, defense response to fungus, defense response; LOCATED IN: cell wall; EXPRESSED IN: 10 plant structures; EXPRESSED DURING: 7 growth stages; CONTAINS InterPro DOMAIN/s: Leucine-rich repeat-containing N-terminal domain, type 2 …	-7.33185	-0.812245	0.00024058	0.0334277
41106	20.1.7	stress.biotic.PR-proteins	|MERCATOR: (loc_os11g07690.1 : 62.8) no description available & (at3g13660 : 53.9) Disease resistance-responsive (dirigent-like protein) family protein; CONTAINS InterPro DOMAIN/s: Plant disease resistance response protein (InterPro:IPR004265); BEST Arabidopsis thaliana protein match is: Disease resistance-responsive (dirigent-like protein) family protein (TAIR:AT1G55210.2); Has 807 Blast hits to…	-3.03795	0.815402	0.000124725	0.0257943
41712	20.1.7	stress.biotic.PR-proteins	|MERCATOR: (loc_os08g19980.1 : 1060.0) no description available & (at3g14470 : 325.0) NB-ARC domain-containing disease resistance protein; FUNCTIONS IN: protein binding; INVOLVED IN: apoptosis, defense response; LOCATED IN: endomembrane system; EXPRESSED IN: 23 plant structures; EXPRESSED DURING: 14 growth stages; CONTAINS InterPro DOMAIN/s: Leucine-rich repeat-containing protein (InterPro:IPR015…	-9.10438	2.89116	6.33249e-05	0.0205526
43539	20.1.7	stress.biotic.PR-proteins	|MERCATOR: (loc_os11g10770.1 : 103.0) no description available & (at3g50950 : 57.8) HOPZ-ACTIVATED RESISTANCE 1 (ZAR1); FUNCTIONS IN: ATP binding; INVOLVED IN: defense response, apoptosis; LOCATED IN: cellular_component unknown; EXPRESSED IN: 22 plant structures; EXPRESSED DURING: 13 growth stages; CONTAINS InterPro DOMAIN/s: NB-ARC (InterPro:IPR002182), Disease resistance protein (InterPro:IPR00…	-9.56404	-0.461783	0.000242342	0.033543
45052	20.1.7	stress.biotic.PR-proteins	|MERCATOR: (loc_os11g44960.1 : 103.0) no description available & (gnl|cdd|36433 : 52.7) no description available & (at3g14470 : 49.7) NB-ARC domain-containing disease resistance protein; FUNCTIONS IN: protein binding; INVOLVED IN: apoptosis, defense response; LOCATED IN: endomembrane system; EXPRESSED IN: 23 plant structures; EXPRESSED DURING: 14 growth stages; CONTAINS InterPro DOMAIN/s: Leucine…	-8.2092	-1.6472	0.000446622	0.0433439
45817	20.1.7	stress.biotic.PR-proteins	|MERCATOR: (loc_os11g44580.1 : 102.0) no description available & (at3g14470 : 57.4) NB-ARC domain-containing disease resistance protein; FUNCTIONS IN: protein binding; INVOLVED IN: apoptosis, defense response; LOCATED IN: endomembrane system; EXPRESSED IN: 23 plant structures; EXPRESSED DURING: 14 growth stages; CONTAINS InterPro DOMAIN/s: Leucine-rich repeat-containing protein (InterPro:IPR01576…	-5.85831	-1.47089	0.000558057	0.0477212
47406	20.1.7	stress.biotic.PR-proteins	|MERCATOR: (loc_os11g10760.1 : 87.8) no description available & (at1g69550 : 55.5) disease resistance protein (TIR-NBS-LRR class); FUNCTIONS IN: transmembrane receptor activity, nucleoside-triphosphatase activity, nucleotide binding, ATP binding; INVOLVED IN: signal transduction, defense response, apoptosis, innate immune response; LOCATED IN: intrinsic to membrane, endomembrane system; EXPRESSED…	-10.645	0.581665	9.13626e-05	0.0237271
48917	20.1.7	stress.biotic.PR-proteins	|MERCATOR: (loc_os02g18080.1 : 144.0) no description available & (at3g14470 : 87.8) NB-ARC domain-containing disease resistance protein; FUNCTIONS IN: protein binding; INVOLVED IN: apoptosis, defense response; LOCATED IN: endomembrane system; EXPRESSED IN: 23 plant structures; EXPRESSED DURING: 14 growth stages; CONTAINS InterPro DOMAIN/s: Leucine-rich repeat-containing protein (InterPro:IPR01576…	-6.85855	1.42665	2.82759e-05	0.0137295
49378	20.1.7	stress.biotic.PR-proteins	|MERCATOR: (loc_os02g16110.1 : 302.0) no description available & (at1g69550 : 65.1) disease resistance protein (TIR-NBS-LRR class); FUNCTIONS IN: transmembrane receptor activity, nucleoside-triphosphatase activity, nucleotide binding, ATP binding; INVOLVED IN: signal transduction, defense response, apoptosis, innate immune response; LOCATED IN: intrinsic to membrane, endomembrane system; EXPRESSE…	-8.94211	3.42822	1.04506e-05	0.00903621
57328	20.1.7	stress.biotic.PR-proteins	|MERCATOR: (loc_os04g53000.1 : 146.0) no description available & (gnl|cdd|36433 : 46.9) no description available & (gnl|cdd|33637 : 43.8) no description available & (at3g25510 : 43.5) disease resistance protein (TIR-NBS-LRR class), putative; FUNCTIONS IN: transmembrane receptor activity, nucleoside-triphosphatase activity, nucleotide binding, ATP binding; INVOLVED IN: signal transduction, defense…	-10.2236	2.01541	6.66847e-07	0.00267668
61086	20.1.7	stress.biotic.PR-proteins	|MERCATOR: (loc_os08g10260.1 : 152.0) no description available & (gnl|cdd|38301 : 50.8) no description available & (at3g14470 : 50.4) NB-ARC domain-containing disease resistance protein; FUNCTIONS IN: protein binding; INVOLVED IN: apoptosis, defense response; LOCATED IN: endomembrane system; EXPRESSED IN: 23 plant structures; EXPRESSED DURING: 14 growth stages; CONTAINS InterPro DOMAIN/s: Leucine…	-2.92133	1.39041	0.000475012	0.0446178
69146	20.1.7	stress.biotic.PR-proteins	|MERCATOR: (at3g11010 : 89.7) receptor like protein 34 (RLP34); CONTAINS InterPro DOMAIN/s: Leucine-rich repeat, typical subtype (InterPro:IPR003591), Leucine-rich repeat-containing N-terminal domain, type 2 (InterPro:IPR013210), Leucine-rich repeat (InterPro:IPR001611); BEST Arabidopsis thaliana protein match is: receptor like protein 53 (TAIR:AT5G27060.1); Has 142392 Blast hits to 33789 protein…	-7.05598	3.93327	3.58662e-06	0.00599853
387845	20.1.7	stress.biotic.PR-proteins	|MERCATOR: (loc_os08g07380.1 : 163.0) no description available & (at3g50950 : 94.0) HOPZ-ACTIVATED RESISTANCE 1 (ZAR1); FUNCTIONS IN: ATP binding; INVOLVED IN: defense response, apoptosis; LOCATED IN: cellular_component unknown; EXPRESSED IN: 22 plant structures; EXPRESSED DURING: 13 growth stages; CONTAINS InterPro DOMAIN/s: NB-ARC (InterPro:IPR002182), Disease resistance protein (InterPro:IPR00…	-8.16374	-1.66035	0.00043098	0.0430371
463	20.1	stress.biotic	|MERCATOR: (loc_os11g10550.1 : 141.0) no description available & (gnl|cdd|38301 : 51.5) no description available & (at3g07040 : 40.8) Contains an N-terminal tripartite nucleotide binding site and a C-terminal tandem array of leucine-rich repeats. Confers resistance to Pseudomonas syringae strains that carry the avirulence genes avrB and avrRpm1.; RESISTANCE TO P. SYRINGAE PV MACULICOLA 1 (RPM1); …	-9.2017	-0.777053	0.000558401	0.0477212
1681	20.1	stress.biotic	|MERCATOR: (original description: no original description)||TAGI: BJ270447;similar to UniRef100_Q0ITD6 Cluster: Os11g0266500 protein; n=1; Oryza sativa Japonica Group;Rep: Os11g0266500 protein - Oryza sativa subsp. japonica (Rice), partial (5%);Evalue=0.00000000000002;%ident=90.48|MAPMANSTORE: weakly similar to ( 134) loc_os11g16470 12011.m079976 protein MLA10, putative, expressed similar to UniR…	-6.24954	-0.722585	0.000235123	0.0331534
2141	20.1	stress.biotic	|MERCATOR: (loc_os06g17880.1 : 113.0) no description available & (at3g07040 : 57.4) Contains an N-terminal tripartite nucleotide binding site and a C-terminal tandem array of leucine-rich repeats. Confers resistance to Pseudomonas syringae strains that carry the avirulence genes avrB and avrRpm1.; RESISTANCE TO P. SYRINGAE PV MACULICOLA 1 (RPM1); FUNCTIONS IN: protein binding, nucleotide binding;…	-8.66246	-1.27695	0.000234125	0.0331534
2985	20.1	stress.biotic	|MERCATOR: (original description: no original description)||BRACHYPODIUM GENOME: Bradi3g61040.1 ; weakly similar to ( 187) AT3G14460 | Symbols: | disease resistance protein (NBS-LRR class), putative | chr3:4851990-4856264 REVERSEhighly similar to ( 607) loc_os06g16790 12006.m06392 protein cyst nematode resistance protein, putative, expressed NB-ARC no original description||RICE GENOME: Loc_Os11g4…	-7.74534	-2.02497	0.000560618	0.0477212
7609	20.1	stress.biotic	|MERCATOR: (original description: no original description)||BRACHYPODIUM GENOME: Bradi3g61040.1 ; weakly similar to ( 187) AT3G14460 | Symbols: | disease resistance protein (NBS-LRR class), putative | chr3:4851990-4856264 REVERSEhighly similar to ( 607) loc_os06g16790 12006.m06392 protein cyst nematode resistance protein, putative, expressed NB-ARC no original description||RICE GENOME: Loc_Os11g4…	-8.45988	-1.40716	1.4143e-05	0.0101645
7638	20.1	stress.biotic	|MERCATOR: (original description: no original description)||BREAD.WHEAT.TIGR: CJ736229; Phosphoglycerate kinase, chloroplast precursor [Triticum aestivum (Wheat)]; Evalue=7E-171; %ident=100||BRACHYPODIUM GENOME: Bradi1g50407.2 ; moderately similar to ( 251) AT3G07040 | Symbols: RPM1, RPS3 | RPM1 (RESISTANCE TO P. SYRINGAE PV MACULICOLA 1); nucleotide binding / protein binding | chr3:2226244-22290…	-8.46228	0.200255	0.000183806	0.0302372
9938	20.1	stress.biotic	|MERCATOR: (original description: no original description)||BRACHYPODIUM GENOME: Bradi3g60446.1 ; weakly similar to ( 194) AT3G46530 | Symbols: RPP13 | RPP13 (RECOGNITION OF PERONOSPORA PARASITICA 13); ATP binding | chr3:17130739-17133246 REVERSEhighly similar to ( 787) loc_os08g28540 12008.m06860 protein resistance protein LR10, putative NB-ARC no original description||RICE GENOME: Loc_Os08g2857…	-8.61937	-1.29092	8.25809e-05	0.0235645
10175	20.1	stress.biotic	|MERCATOR: (loc_os05g40150.1 : 104.0) no description available & (at3g50950 : 63.5) HOPZ-ACTIVATED RESISTANCE 1 (ZAR1); FUNCTIONS IN: ATP binding; INVOLVED IN: defense response, apoptosis; LOCATED IN: cellular_component unknown; EXPRESSED IN: 22 plant structures; EXPRESSED DURING: 13 growth stages; CONTAINS InterPro DOMAIN/s: NB-ARC (InterPro:IPR002182), Disease resistance protein (InterPro:IPR00…	-7.65938	-2.02695	0.000192973	0.031066
20594	20.1	stress.biotic	|MERCATOR: (loc_os11g45840.1 : 302.0) no description available & (gnl|cdd|36433 : 52.0) no description available & (at4g13820 : 43.9) Leucine-rich repeat (LRR) family protein; FUNCTIONS IN: kinase activity; INVOLVED IN: signal transduction; LOCATED IN: endomembrane system; EXPRESSED IN: stem, leaf whorl, hypocotyl, root, leaf; EXPRESSED DURING: LP.06 six leaves visible; CONTAINS InterPro DOMAIN/s…	-6.75256	1.00596	3.16558e-05	0.0141742
25713	20.1	stress.biotic	|MERCATOR: (original description: no original description)||TAGI: TC416134;weakly similar to UniRef100_Q0E209 Cluster: Os02g0282500 protein; n=1; Oryza sativa Japonica Group;Rep: Os02g0282500 protein - Oryza sativa subsp. japonica (Rice), partial (8%);Evalue=2E-102;%ident=100|MAPMANSTORE: weakly similar to ( 168) loc_os02g18080 12002.m07052 protein NB-ARC domain containing protein, expressed weak…	-8.95906	-0.979042	0.000443738	0.0433439
28424	20.1	stress.biotic	|MERCATOR: (original description: no original description)||BRACHYPODIUM GENOME: Bradi1g50407.2 ; moderately similar to ( 251) AT3G07040 | Symbols: RPM1, RPS3 | RPM1 (RESISTANCE TO P. SYRINGAE PV MACULICOLA 1); nucleotide binding / protein binding | chr3:2226244-2229024 REVERSEnearly identical (1040) loc_os06g17880 12006.m06500 protein disease resistance RPP13-like protein 3, putative, expressed …	-8.62964	0.327102	8.38821e-08	0.000721494
29255	20.1	stress.biotic	|MERCATOR: (loc_os01g41890.1 : 88.6) no description available & (at3g46730 : 54.3) NB-ARC domain-containing disease resistance protein; FUNCTIONS IN: ATP binding; INVOLVED IN: defense response, apoptosis; LOCATED IN: endomembrane system; CONTAINS InterPro DOMAIN/s: NB-ARC (InterPro:IPR002182), Disease resistance protein (InterPro:IPR000767); BEST Arabidopsis thaliana protein match is: NB-ARC doma…	-6.82009	-0.57666	1.85289e-05	0.011156
29809	20.1	stress.biotic	|MERCATOR: (original description: no original description)||BRACHYPODIUM GENOME: Bradi1g50420.1 ; weakly similar to ( 138) AT3G46530 | Symbols: RPP13 | RPP13 (RECOGNITION OF PERONOSPORA PARASITICA 13); ATP binding | chr3:17130739-17133246 REVERSEmoderately similar to ( 448) loc_os06g17880 12006.m06500 protein disease resistance RPP13-like protein 3, putative, expressed NB-ARC no original descript…	-8.0775	-1.73636	0.00033461	0.039315
30541	20.1	stress.biotic	|MERCATOR: (original description: no original description)||TAGI: DR732849;;Evalue=3E-113;%ident=86.28|MAPMANSTORE: weakly similar to ( 105) loc_os10g03570 12010.m03774 protein RGH1A, putative||BREAD.WHEAT.TIGR: DR732849; DR732849; Evalue=4E-113; %ident=86.28||BRACHYPODIUM GENOME: Bradi2g39390.1 ; moderately similar to ( 295) loc_os08g07330 12008.m26591 protein RGH1A, putative, expressed no origi…	-9.31449	-0.697024	1.63829e-06	0.00404217
31443	20.1	stress.biotic	|MERCATOR: (original description: no original description)||BRACHYPODIUM GENOME: Bradi2g09434.1 ; weakly similar to ( 158) AT3G46710 | Symbols: | disease resistance protein (CC-NBS-LRR class), putative | chr3:17206489-17209032 REVERSEvery weakly similar to (80.9) ERF4_NICSY Ethylene-responsive transcription factor 4 (Ethylene-responsive element-binding factor 4 homolog) (EREBP-3) (NsERF3) - Nicot…	-8.91211	0.636229	4.53931e-05	0.0171891
33383	20.1	stress.biotic	|MERCATOR: (original description: no original description)||BRACHYPODIUM GENOME: Bradi3g10370.1 ; moderately similar to ( 216) AT3G14470 | Symbols: | disease resistance protein (NBS-LRR class), putative | chr3:4857940-4861104 FORWARDhighly similar to ( 602) loc_os02g18080 12002.m07052 protein NB-ARC domain containing protein, expressed NB-ARC no original description||RICE GENOME: Loc_Os02g18000.1…	-9.13051	0.956274	0.000205744	0.0318449
35796	20.1	stress.biotic	|MERCATOR: (loc_os12g37740.1 : 277.0) no description available & (at3g07040 : 108.0) Contains an N-terminal tripartite nucleotide binding site and a C-terminal tandem array of leucine-rich repeats. Confers resistance to Pseudomonas syringae strains that carry the avirulence genes avrB and avrRpm1.; RESISTANCE TO P. SYRINGAE PV MACULICOLA 1 (RPM1); FUNCTIONS IN: protein binding, nucleotide binding…	-10.0898	0.0400625	0.000142744	0.0271949
37038	20.1	stress.biotic	|MERCATOR: (original description: no original description)||BRACHYPODIUM GENOME: Bradi5g22160.1 ; weakly similar to ( 145) loc_os04g53160 12004.m10207 protein NBS-LRR disease resistance protein, putative, expressed no original description||RICE GENOME: Loc_Os04g53120.1 ; 12004.m10203 protein NB-ARC domain containing protein, expressed|	-8.68725	-1.24491	0.000530171	0.0466682
37483	20.1	stress.biotic	|MERCATOR: (loc_os07g03000.1 : 89.4) no description available & (at5g20480 : 82.8) Encodes a predicted leucine-rich repeat receptor kinase (LRR-RLK). Functions as the receptor for bacterial PAMP (pathogen associated molecular patterns) EF-Tu.; EF-TU receptor (EFR); FUNCTIONS IN: protein serine/threonine kinase activity, transmembrane receptor protein kinase activity, kinase activity, ATP binding;…	-7.76164	-0.371841	0.000426364	0.0430371
38389	20.1	stress.biotic	|MERCATOR: (p50697|rst3_avesa : 145.0) Thaumatin-like pathogenesis-related protein 3 precursor - Avena sativa (Oat) & (loc_os12g43380.1 : 137.0) no description available & (at4g11650 : 72.0) osmotin-like protein; osmotin 34 (OSM34); INVOLVED IN: defense response to fungus, incompatible interaction, response to salt stress, defense response to bacterium, incompatible interaction, response to other…	-3.06186	1.70661	0.000234914	0.0331534
38857	20.1	stress.biotic	|MERCATOR: (loc_os12g10710.1 : 483.0) no description available & (at3g14460 : 156.0) LRR and NB-ARC domains-containing disease resistance protein; FUNCTIONS IN: ATP binding; INVOLVED IN: apoptosis, defense response; CONTAINS InterPro DOMAIN/s: NB-ARC (InterPro:IPR002182), Leucine-rich repeat (InterPro:IPR001611), Disease resistance protein (InterPro:IPR000767); BEST Arabidopsis thaliana protein m…	-10.3286	0.271902	0.00011574	0.0252485
40093	20.1	stress.biotic	|MERCATOR: (original description: no original description)||BRACHYPODIUM GENOME: Bradi3g60337.1 ; moderately similar to ( 270) AT3G14470 | Symbols: | disease resistance protein (NBS-LRR class), putative | chr3:4857940-4861104 FORWARDnearly identical (1335) loc_os02g16270 12002.m100165 protein xa1-like protein, putative, expressed NB-ARC no original description||RICE GENOME: Loc_Os01g02250.1 ; 120…	-9.15801	-0.83823	0.000402725	0.0423274
40955	20.1	stress.biotic	|MERCATOR: (loc_os09g30220.1 : 100.0) no description available & (at3g07040 : 64.3) Contains an N-terminal tripartite nucleotide binding site and a C-terminal tandem array of leucine-rich repeats. Confers resistance to Pseudomonas syringae strains that carry the avirulence genes avrB and avrRpm1.; RESISTANCE TO P. SYRINGAE PV MACULICOLA 1 (RPM1); FUNCTIONS IN: protein binding, nucleotide binding;…	-11.4466	1.37513	3.26016e-05	0.0141742
41794	20.1	stress.biotic	|MERCATOR: (original description: no original description)||TAGI: CA598476;UniRef100_Q9ATQ8 Cluster: LRR19; n=1; Triticum aestivum;Rep: LRR19 - Triticum aestivum (Wheat), partial (12%);Evalue=9E-144;%ident=93.82|MAPMANSTORE: very weakly similar to (88.6) loc_os01g36640 12001.m09959 protein disease resistance protein RPM1, putative, expressed UniRef100_Q9ATQ8 Cluster: LRR19; n=1; Triticum aestivum…	-8.47189	0.885773	0.000267987	0.0351914
42126	20.1	stress.biotic	|MERCATOR: (original description: no original description)||TAGI: CJ899922;homologue to UniRef100_Q9ATQ8 Cluster: LRR19; n=1; Triticum aestivum;Rep: LRR19 - Triticum aestivum (Wheat), partial (11%);Evalue=5E-40;%ident=76.79|MAPMANSTORE: weakly similar to ( 136) loc_os01g36640 12001.m09959 protein disease resistance protein RPM1, putative, expressed homologue to UniRef100_Q9ATQ8 Cluster: LRR19; n=…	-8.85909	1.77869	0.000150844	0.0277036
44538	20.1	stress.biotic	|MERCATOR: (loc_os11g37880.1 : 94.7) no description available & (at3g46530 : 54.3) Confers resistance to the biotrophic oomycete, Peronospora parasitica. Encodes an NBS-LRR type R protein with a putative amino-terminal leucine zipper. Fungal protein ATR13 induces RPP13 gene expression and disease resistance.; RECOGNITION OF PERONOSPORA PARASITICA 13 (RPP13); FUNCTIONS IN: ATP binding; INVOLVED IN…	-8.54522	0.23105	0.000388334	0.0417521
45114	20.1	stress.biotic	|MERCATOR: (original description: no original description)||TAGI: CJ808507;;Evalue=1E-70;%ident=91.28|MAPMANSTORE: moderately similar to ( 202) loc_os02g02670 12002.m05616 protein NBS-LRR disease resistance protein, putative||BRACHYPODIUM GENOME: Bradi5g22140.1 ; moderately similar to ( 204) loc_os04g53160 12004.m10207 protein NBS-LRR disease resistance protein, putative, expressed no original de…	-9.3638	-0.641647	0.000313009	0.0379959
45219	20.1	stress.biotic	|MERCATOR: (loc_os01g06790.1 : 370.0) no description available & (at3g05660 : 214.0) receptor like protein 33 (RLP33); FUNCTIONS IN: kinase activity; INVOLVED IN: signal transduction, defense response; LOCATED IN: chloroplast; EXPRESSED IN: 10 plant structures; EXPRESSED DURING: 10 growth stages; CONTAINS InterPro DOMAIN/s: Leucine-rich repeat, typical subtype (InterPro:IPR003591), Leucine-rich r…	-8.38522	0.846278	0.000133422	0.0262522
45993	20.1	stress.biotic	|MERCATOR: (original description: no original description)||TAGI: BQ620263;similar to UniRef100_A8JAZ9 Cluster: Predicted protein; n=1; Chlamydomonas reinhardtii;Rep: Predicted protein - Chlamydomonas reinhardtii, partial (8%);Evalue=0;%ident=100|MAPMANSTORE: similar to UniRef100_A8JAZ9 Cluster: Predicted protein; n=1; Chlamydomonas reinhardtii;Rep: Predicted protein - Chlamydomonas reinhardtii, …	-10.0458	1.71731	1.01446e-05	0.00898231
46371	20.1	stress.biotic	|MERCATOR: (loc_os06g16410.1 : 155.0) no description available & (at1g20780 : 81.3) Encodes a protein containing a U-box and an ARM domain.; senescence-associated E3 ubiquitin ligase 1 (SAUL1); FUNCTIONS IN: ubiquitin-protein ligase activity; INVOLVED IN: regulation of chlorophyll catabolic process, regulation of chlorophyll biosynthetic process, leaf senescence, regulation of abscisic acid biosy…	5.50976	-1.20351	0.000338733	0.0395247
46405	20.1	stress.biotic	|MERCATOR: (original description: no original description)||TAGI: CK166779;weakly similar to UniRef100_Q0DCV0 Cluster: Os06g0287000 protein; n=1; Oryza sativa Japonica Group;Rep: Os06g0287000 protein - Oryza sativa subsp. japonica (Rice), partial (13%);Evalue=0;%ident=98.98|MAPMANSTORE: weakly similar to ( 161) loc_os06g17920 12006.m06504 protein disease resistance RPP8-like protein 3, putative w…	-9.02038	0.69619	0.000232841	0.0331534
46878	20.1	stress.biotic	|MERCATOR: (loc_os11g34970.1 : 115.0) no description available & (gnl|cdd|36433 : 41.9) no description available & (at5g43470 : 40.4) Confers resistance to Peronospora parasitica. In arabidopsis ecotype Dijon-17, HRT-mediated signaling is dependent on light for the induction of hypersensitive response and resistance to turnip crinkle virus.; RECOGNITION OF PERONOSPORA PARASITICA 8 (RPP8); FUNCTIO…	-9.49699	-0.522445	9.41601e-05	0.0240218
47359	20.1	stress.biotic	|MERCATOR: (loc_os08g42930.1 : 149.0) no description available & (at3g14470 : 85.5) NB-ARC domain-containing disease resistance protein; FUNCTIONS IN: protein binding; INVOLVED IN: apoptosis, defense response; LOCATED IN: endomembrane system; EXPRESSED IN: 23 plant structures; EXPRESSED DURING: 14 growth stages; CONTAINS InterPro DOMAIN/s: Leucine-rich repeat-containing protein (InterPro:IPR01576…	-9.48865	-0.532522	0.000263889	0.0349461
48673	20.1	stress.biotic	|MERCATOR: (loc_os01g41750.1 : 177.0) no description available & (at1g75640 : 91.3) Leucine-rich receptor-like protein kinase family protein; FUNCTIONS IN: protein serine/threonine kinase activity, kinase activity, ATP binding; INVOLVED IN: transmembrane receptor protein tyrosine kinase signaling pathway, protein amino acid phosphorylation; LOCATED IN: plasma membrane; EXPRESSED IN: 18 plant stru…	-9.60356	-0.424563	0.000232865	0.0331534
49317	20.1	stress.biotic	|MERCATOR: (original description: no original description)||BRACHYPODIUM GENOME: Bradi3g60337.1 ; moderately similar to ( 270) AT3G14470 | Symbols: | disease resistance protein (NBS-LRR class), putative | chr3:4857940-4861104 FORWARDnearly identical (1335) loc_os02g16270 12002.m100165 protein xa1-like protein, putative, expressed NB-ARC no original description||RICE GENOME: Loc_Os02g16260.1 ; 120…	-11.3324	1.27107	2.76543e-05	0.0135369
49587	20.1	stress.biotic	|MERCATOR: (original description: no original description)||BRACHYPODIUM GENOME: Bradi1g50407.2 ; moderately similar to ( 251) AT3G07040 | Symbols: RPM1, RPS3 | RPM1 (RESISTANCE TO P. SYRINGAE PV MACULICOLA 1); nucleotide binding / protein binding | chr3:2226244-2229024 REVERSEnearly identical (1040) loc_os06g17880 12006.m06500 protein disease resistance RPP13-like protein 3, putative, expressed …	-10.6675	0.604462	2.94262e-05	0.0138456
50371	20.1	stress.biotic	|MERCATOR: (original description: no original description)||TAGI: CD876018;;Evalue=0;%ident=99.13|MAPMANSTORE: 0||BREAD.WHEAT.TIGR: CD876018; CD876018; Evalue=0; %ident=99.13||BRACHYPODIUM GENOME: Bradi3g34967.1 ; moderately similar to ( 359) loc_os11g11790 12011.m05371 protein expressed protein no original description||RICE GENOME: Loc_Os11g11790.1 ; 12011.m05371 protein expressed protein|	-7.52287	1.65803	6.66661e-06	0.00798686
53987	20.1	stress.biotic	|MERCATOR: (loc_os10g21400.1 : 113.0) no description available & (at5g35450 : 56.2) Disease resistance protein (CC-NBS-LRR class) family; FUNCTIONS IN: ATP binding; INVOLVED IN: defense response, apoptosis; LOCATED IN: plasma membrane; EXPRESSED IN: 21 plant structures; EXPRESSED DURING: 10 growth stages; CONTAINS InterPro DOMAIN/s: NB-ARC (InterPro:IPR002182), Disease resistance protein (InterPr…	-8.49544	3.88676	1.36958e-05	0.0100563
54337	20.1	stress.biotic	|MERCATOR: (loc_os06g17920.1 : 131.0) no description available & (gnl|cdd|38301 : 48.1) no description available & (at3g07040 : 45.8) Contains an N-terminal tripartite nucleotide binding site and a C-terminal tandem array of leucine-rich repeats. Confers resistance to Pseudomonas syringae strains that carry the avirulence genes avrB and avrRpm1.; RESISTANCE TO P. SYRINGAE PV MACULICOLA 1 (RPM1); …	-10.8237	2.50066	2.67521e-08	0.000322143
54400	20.1	stress.biotic	|MERCATOR: (loc_os11g34880.1 : 89.7) no description available & (at3g46730 : 61.6) NB-ARC domain-containing disease resistance protein; FUNCTIONS IN: ATP binding; INVOLVED IN: defense response, apoptosis; LOCATED IN: endomembrane system; CONTAINS InterPro DOMAIN/s: NB-ARC (InterPro:IPR002182), Disease resistance protein (InterPro:IPR000767); BEST Arabidopsis thaliana protein match is: NB-ARC doma…	-8.89998	3.62366	2.54622e-09	0.000115471
55293	20.1	stress.biotic	|MERCATOR: (loc_os01g36640.1 : 164.0) no description available & (at1g58400 : 62.8) Disease resistance protein (CC-NBS-LRR class) family; FUNCTIONS IN: ATP binding; INVOLVED IN: defense response, apoptosis; LOCATED IN: cellular_component unknown; CONTAINS InterPro DOMAIN/s: NB-ARC (InterPro:IPR002182), Disease resistance protein (InterPro:IPR000767); BEST Arabidopsis thaliana protein match is: Di…	-9.48612	1.14967	0.000167262	0.0291886
55778	20.1	stress.biotic	|MERCATOR: (loc_os08g16460.1 : 273.0) no description available & (at3g14470 : 159.0) NB-ARC domain-containing disease resistance protein; FUNCTIONS IN: protein binding; INVOLVED IN: apoptosis, defense response; LOCATED IN: endomembrane system; EXPRESSED IN: 23 plant structures; EXPRESSED DURING: 14 growth stages; CONTAINS InterPro DOMAIN/s: Leucine-rich repeat-containing protein (InterPro:IPR0157…	-12.048	1.97543	8.07887e-06	0.00844139
56920	20.1	stress.biotic	|MERCATOR: (original description: no original description)||TAGI: CA681703;weakly similar to UniRef100_A9UKM3 Cluster: NBS-LRR resistance-like protein; n=1; Hordeum vulgare;Rep: NBS-LRR resistance-like protein - Hordeum vulgare (Barley), partial (7%);Evalue=9E-107;%ident=100|MAPMANSTORE: weakly similar to UniRef100_A9UKM3 Cluster: NBS-LRR resistance-like protein; n=1; Hordeum vulgare;Rep: NBS-LRR…	-3.62595	1.16781	5.82566e-06	0.00797176
57446	20.1	stress.biotic	|MERCATOR: (loc_os08g28540.1 : 231.0) no description available & (at3g50950 : 70.1) HOPZ-ACTIVATED RESISTANCE 1 (ZAR1); FUNCTIONS IN: ATP binding; INVOLVED IN: defense response, apoptosis; LOCATED IN: cellular_component unknown; EXPRESSED IN: 22 plant structures; EXPRESSED DURING: 13 growth stages; CONTAINS InterPro DOMAIN/s: NB-ARC (InterPro:IPR002182), Disease resistance protein (InterPro:IPR00…	-4.13694	0.348975	0.000487515	0.0451581
58111	20.1	stress.biotic	|MERCATOR: (original description: no original description)||TAGI: GH732810;;Evalue=6E-176;%ident=93.92|MAPMANSTORE: 0||BREAD.WHEAT.TIGR: BQ905461; BQ905461; Evalue=2E-82; %ident=96.28||BRACHYPODIUM GENOME: Bradi3g07780.1 ; moderately similar to ( 417) loc_os08g14850 12008.m05608 protein resistance protein, putative, expressed no original description||RICE GENOME: Loc_Os06g37810.1 ; 12006.m08316 p…	-5.11651	-0.404654	0.00017158	0.0294607
59480	20.1	stress.biotic	|MERCATOR: (loc_os09g30220.1 : 313.0) no description available & (at3g07040 : 121.0) Contains an N-terminal tripartite nucleotide binding site and a C-terminal tandem array of leucine-rich repeats. Confers resistance to Pseudomonas syringae strains that carry the avirulence genes avrB and avrRpm1.; RESISTANCE TO P. SYRINGAE PV MACULICOLA 1 (RPM1); FUNCTIONS IN: protein binding, nucleotide binding…	-8.1389	3.56109	0.000533119	0.0468435
60041	20.1	stress.biotic	|MERCATOR: (loc_os11g39550.1 : 161.0) no description available & (gnl|cdd|36433 : 52.7) no description available & (at3g07040 : 50.1) Contains an N-terminal tripartite nucleotide binding site and a C-terminal tandem array of leucine-rich repeats. Confers resistance to Pseudomonas syringae strains that carry the avirulence genes avrB and avrRpm1.; RESISTANCE TO P. SYRINGAE PV MACULICOLA 1 (RPM1); …	-8.34975	0.0968238	0.000256729	0.0344262
60158	20.1	stress.biotic	|MERCATOR: (loc_os01g06876.1 : 83.2) no description available & (at1g45616 : 64.7) receptor like protein 6 (RLP6); INVOLVED IN: signal transduction, defense response; LOCATED IN: membrane; EXPRESSED IN: leaf; CONTAINS InterPro DOMAIN/s: Leucine-rich repeat-containing N-terminal domain, type 2 (InterPro:IPR013210), Leucine-rich repeat (InterPro:IPR001611); BEST Arabidopsis thaliana protein match i…	-3.8265	0.708075	0.000506617	0.0454548
61125	20.1	stress.biotic	|MERCATOR: (loc_os10g22510.1 : 182.0) no description available & (at1g53350 : 47.8) Disease resistance protein (CC-NBS-LRR class) family; FUNCTIONS IN: ATP binding; INVOLVED IN: apoptosis, defense response; EXPRESSED IN: 19 plant structures; EXPRESSED DURING: 9 growth stages; CONTAINS InterPro DOMAIN/s: NB-ARC (InterPro:IPR002182), Disease resistance protein (InterPro:IPR000767); BEST Arabidopsis…	-3.33158	5.45886	8.90829e-05	0.0236979
61388	20.1	stress.biotic	|MERCATOR: (loc_os01g36640.1 : 138.0) no description available & (at3g07040 : 79.7) Contains an N-terminal tripartite nucleotide binding site and a C-terminal tandem array of leucine-rich repeats. Confers resistance to Pseudomonas syringae strains that carry the avirulence genes avrB and avrRpm1.; RESISTANCE TO P. SYRINGAE PV MACULICOLA 1 (RPM1); FUNCTIONS IN: protein binding, nucleotide binding;…	-2.3157	1.26822	0.00053426	0.0468435
62167	20.1	stress.biotic	|MERCATOR: (loc_os11g44580.1 : 160.0) no description available & (gnl|cdd|36433 : 52.3) no description available & (at3g51560 : 46.6) Disease resistance protein (TIR-NBS-LRR class) family; FUNCTIONS IN: transmembrane receptor activity, ATP binding; INVOLVED IN: signal transduction, defense response, apoptosis, innate immune response; LOCATED IN: intrinsic to membrane; CONTAINS InterPro DOMAIN/s: …	-3.10296	3.31829	0.000144742	0.027405
66004	20.1	stress.biotic	|MERCATOR: (loc_os11g45620.1 : 150.0) no description available & (at3g14470 : 69.7) NB-ARC domain-containing disease resistance protein; FUNCTIONS IN: protein binding; INVOLVED IN: apoptosis, defense response; LOCATED IN: endomembrane system; EXPRESSED IN: 23 plant structures; EXPRESSED DURING: 14 growth stages; CONTAINS InterPro DOMAIN/s: Leucine-rich repeat-containing protein (InterPro:IPR01576…	-5.84926	4.01899	4.62138e-07	0.00214037
66457	20.1	stress.biotic	|MERCATOR: (loc_os06g17880.1 : 127.0) no description available & (at3g46530 : 72.4) Confers resistance to the biotrophic oomycete, Peronospora parasitica. Encodes an NBS-LRR type R protein with a putative amino-terminal leucine zipper. Fungal protein ATR13 induces RPP13 gene expression and disease resistance.; RECOGNITION OF PERONOSPORA PARASITICA 13 (RPP13); FUNCTIONS IN: ATP binding; INVOLVED I…	-8.82089	2.23644	1.3598e-08	0.000204681
67483	20.1	stress.biotic	|MERCATOR: (loc_os06g03500.1 : 154.0) no description available & (at3g46730 : 58.5) NB-ARC domain-containing disease resistance protein; FUNCTIONS IN: ATP binding; INVOLVED IN: defense response, apoptosis; LOCATED IN: endomembrane system; CONTAINS InterPro DOMAIN/s: NB-ARC (InterPro:IPR002182), Disease resistance protein (InterPro:IPR000767); BEST Arabidopsis thaliana protein match is: NB-ARC dom…	-2.64467	4.00184	5.38675e-05	0.0190812
139293	20.1	stress.biotic	|MERCATOR: (loc_os11g35580.1 : 97.8) no description available & (gnl|cdd|38301 : 51.2) no description available & (at3g07040 : 44.3) Contains an N-terminal tripartite nucleotide binding site and a C-terminal tandem array of leucine-rich repeats. Confers resistance to Pseudomonas syringae strains that carry the avirulence genes avrB and avrRpm1.; RESISTANCE TO P. SYRINGAE PV MACULICOLA 1 (RPM1); F…	-9.31381	-0.686111	0.000205451	0.0318449
223266	20.1	stress.biotic	|MERCATOR: (loc_os06g17930.1 : 144.0) no description available & (at3g46730 : 62.4) NB-ARC domain-containing disease resistance protein; FUNCTIONS IN: ATP binding; INVOLVED IN: defense response, apoptosis; LOCATED IN: endomembrane system; CONTAINS InterPro DOMAIN/s: NB-ARC (InterPro:IPR002182), Disease resistance protein (InterPro:IPR000767); BEST Arabidopsis thaliana protein match is: NB-ARC dom…	-8.28016	-1.60816	5.90219e-05	0.0200771
330545	20.1	stress.biotic	|MERCATOR: (loc_os11g44580.1 : 190.0) no description available & (at3g14460 : 66.6) LRR and NB-ARC domains-containing disease resistance protein; FUNCTIONS IN: ATP binding; INVOLVED IN: apoptosis, defense response; CONTAINS InterPro DOMAIN/s: NB-ARC (InterPro:IPR002182), Leucine-rich repeat (InterPro:IPR001611), Disease resistance protein (InterPro:IPR000767); BEST Arabidopsis thaliana protein ma…	-8.36804	-1.53145	0.000105216	0.0241662
40682	20.2.1	stress.abiotic.heat	|MERCATOR: (loc_os01g13760.1 : 58.9) no description available & (at2g20560 : 55.8) DNAJ heat shock family protein; FUNCTIONS IN: unfolded protein binding, heat shock protein binding; INVOLVED IN: protein folding; LOCATED IN: cellular_component unknown; EXPRESSED IN: 10 plant structures; EXPRESSED DURING: M germinated pollen stage, 4 anthesis, C globular stage, petal differentiation and expansion …	4.85431	-0.487898	0.000413912	0.042856
41858	20.2.1	stress.abiotic.heat	|MERCATOR: (loc_os06g11610.1 : 112.0) no description available & (q39818|hs22m_soybn : 73.9) Heat shock 22 kDa protein, mitochondrial precursor - Glycine max (Soybean) & (at5g51440 : 66.2) HSP20-like chaperones superfamily protein; CONTAINS InterPro DOMAIN/s: Heat shock protein Hsp20 (InterPro:IPR002068), HSP20-like chaperone (InterPro:IPR008978); BEST Arabidopsis thaliana protein match is: mitoc…	5.97111	-0.170736	0.000148801	0.0276796
42334	20.2.1	stress.abiotic.heat	|MERCATOR: (loc_os02g48110.1 : 164.0) no description available & (at4g16660 : 122.0) heat shock protein 70 (Hsp 70) family protein; FUNCTIONS IN: ATP binding; LOCATED IN: plasma membrane, chloroplast; EXPRESSED IN: 24 plant structures; EXPRESSED DURING: 13 growth stages; CONTAINS InterPro DOMAIN/s: Heat shock protein 70, conserved site (InterPro:IPR018181), Heat shock protein Hsp70 (InterPro:IPR0…	4.66497	-0.947965	0.000421275	0.0430371
54186	20.2.1	stress.abiotic.heat	|MERCATOR: (loc_os02g54140.1 : 123.0) no description available & (at1g54050 : 73.2) HSP20-like chaperones superfamily protein; CONTAINS InterPro DOMAIN/s: Heat shock protein Hsp20 (InterPro:IPR002068), HSP20-like chaperone (InterPro:IPR008978); BEST Arabidopsis thaliana protein match is: heat shock protein 17.6A (TAIR:AT5G12030.1); Has 4491 Blast hits to 4491 proteins in 1181 species: Archae - 16…	6.26549	1.41865	0.000336309	0.0393181
55147	20.2.1	stress.abiotic.heat	|MERCATOR: (q6f2y7|hs101_orysa : 238.0) Heat shock protein 101 - Oryza sativa (Rice) & (loc_os05g44340.1 : 238.0) no description available & (at1g74310 : 196.0) Encodes ClpB1, which belongs to the Casein lytic proteinase/heat shock protein 100 (Clp/Hsp100) family. Involved in refolding of proteins which form aggregates under heat stress. Also known as AtHsp101. AtHsp101 is a cytosolic heat shock …	4.58769	2.07299	0.000356774	0.0401
61435	20.2.1	stress.abiotic.heat	|MERCATOR: (q6f2y7|hs101_orysa : 527.0) Heat shock protein 101 - Oryza sativa (Rice) & (loc_os05g44340.1 : 527.0) no description available & (at1g74310 : 491.0) Encodes ClpB1, which belongs to the Casein lytic proteinase/heat shock protein 100 (Clp/Hsp100) family. Involved in refolding of proteins which form aggregates under heat stress. Also known as AtHsp101. AtHsp101 is a cytosolic heat shock …	5.41904	2.0742	2.25714e-05	0.0125511
471991	20.2.1	stress.abiotic.heat	|MERCATOR: (at5g02490 : 199.0) Heat shock protein 70 (Hsp 70) family protein; FUNCTIONS IN: protein binding; INVOLVED IN: protein folding, response to cadmium ion, response to heat, response to bacterium; LOCATED IN: cytosol, cell wall, plasma membrane; EXPRESSED IN: 19 plant structures; EXPRESSED DURING: 10 growth stages; CONTAINS InterPro DOMAIN/s: Heat shock protein 70, conserved site (InterPr…	9.069	-0.669225	0.000503068	0.0454548
58123	20.2.2	stress.abiotic.cold	|MERCATOR: (loc_os08g44850.1 : 247.0) no description available & (at5g23950 : 149.0) Calcium-dependent lipid-binding (CaLB domain) family protein; CONTAINS InterPro DOMAIN/s: C2 calcium/lipid-binding domain, CaLB (InterPro:IPR008973), C2 calcium-dependent membrane targeting (InterPro:IPR000008); BEST Arabidopsis thaliana protein match is: Calcium-dependent lipid-binding (CaLB domain) family prote…	3.55205	1.52431	0.000119971	0.0254141
53579	20.2.3	stress.abiotic.drought/salt	|MERCATOR: (original description: no original description)||TAGI: TC383468;;Evalue=7E-149;%ident=98.65|MAPMANSTORE: weakly similar to ( 176) AT5G25610 ; Symbols: RD22 ; RD22; nutrient reservoir ; chr5:8914498-8916684 REVERSEmoderately similar to ( 238) loc_os01g53240 12001.m11493 protein dehydration-induced protein RD22-like protein 2, putative, expressed||BREAD.WHEAT.TIGR: CD877018; CD877018; Ev…	5.44462	1.15727	8.3727e-06	0.00844139
45085	20.2.5	stress.abiotic.light	|MERCATOR: (loc_os03g12820.2 : 188.0) no description available & (gnl|cdd|36433 : 53.1) no description available & (at2g35510 : 47.4) Encodes a WWE domain-containing protein with 76% similarity to RCD1. The protein also contains a PARP signature upstream of the C-terminal protein interaction domain. The PARP signature may bind NAD+ and attach the ADP-ribose-moiety from NAD+ to the target molecule…	3.46779	-1.02866	0.000438652	0.0432255
21704	20	stress	|MERCATOR: (loc_os10g17960.1 : 385.0) no description available & (at4g05200 : 299.0) Encodes a cysteine-rich receptor-like protein kinase.; cysteine-rich RLK (RECEPTOR-like protein kinase) 25 (CRK25); FUNCTIONS IN: kinase activity; INVOLVED IN: protein amino acid phosphorylation; LOCATED IN: endomembrane system; EXPRESSED IN: root; CONTAINS InterPro DOMAIN/s: Protein kinase, ATP binding site (Int…	-9.0031	3.61799	5.19834e-05	0.0189689
33913	20	stress	|MERCATOR: (loc_os11g39450.1 : 110.0) no description available & (at1g56145 : 77.8) Leucine-rich repeat transmembrane protein kinase; FUNCTIONS IN: protein serine/threonine kinase activity, protein kinase activity, ATP binding; INVOLVED IN: protein amino acid phosphorylation; EXPRESSED IN: 18 plant structures; EXPRESSED DURING: 7 growth stages; CONTAINS InterPro DOMAIN/s: Serine/threonine-protein…	-9.19298	-0.806285	0.000384031	0.0415119
35402	20	stress	|MERCATOR: (loc_os11g34624.1 : 92.8) no description available & (at4g23220 : 88.6) Encodes a cysteine-rich receptor-like protein kinase.; cysteine-rich RLK (RECEPTOR-like protein kinase) 14 (CRK14); FUNCTIONS IN: kinase activity; INVOLVED IN: protein amino acid phosphorylation; LOCATED IN: cellular_component unknown; EXPRESSED IN: 14 plant structures; EXPRESSED DURING: 9 growth stages; CONTAINS I…	-9.05446	0.775418	0.000209945	0.0320014
48766	20	stress	|MERCATOR: (loc_os04g45480.1 : 248.0) no description available & (at1g62740 : 180.0) stress-inducible protein, putative; FUNCTIONS IN: binding; INVOLVED IN: response to cadmium ion, response to stress; LOCATED IN: cytosol, nucleus, plasma membrane; EXPRESSED IN: 25 plant structures; EXPRESSED DURING: 14 growth stages; CONTAINS InterPro DOMAIN/s: Heat shock chaperonin-binding (InterPro:IPR006636),…	7.517	-0.153743	2.63036e-05	0.0133085
16007	21.2	redox.ascorbate and glutathione	|MERCATOR: (original description: no original description)||TAGI: TC413137;weakly similar to UniRef100_Q6I681 Cluster: Cytochrome b561; n=1; Zea mays;Rep: Cytochrome b561 - Zea mays (Maize), partial (73%);Evalue=2E-29;%ident=97.37|MAPMANSTORE: weakly similar to ( 122) AT4G25570 ; Symbols: ACYB-2 ; ACYB-2; carbon-monoxide oxygenase ; chr4:13053887-13055518 REVERSEweakly similar to ( 184) loc_os08g…	-8.22576	-0.0730006	0.000419647	0.0430352
50686	21.3	redox.heme	|MERCATOR: (loc_os01g63210.1 : 316.0) no description available & (at2g37970 : 266.0) SOUL-1; FUNCTIONS IN: binding; INVOLVED IN: N-terminal protein myristoylation, red or far-red light signaling pathway; LOCATED IN: plasma membrane, vacuole; EXPRESSED IN: 25 plant structures; EXPRESSED DURING: 15 growth stages; CONTAINS InterPro DOMAIN/s: SOUL haem-binding protein (InterPro:IPR006917); BEST Arabi…	2.69796	2.52564	6.82957e-06	0.00798686
55932	23.2.2	nucleotide metabolism.degradation.purine	|MERCATOR: (loc_os12g31860.4 : 230.0) no description available & (at2g03590 : 157.0) Encodes a member of a class of allantoin transporters.; ureide permease 1 (UPS1); FUNCTIONS IN: allantoin uptake transmembrane transporter activity; INVOLVED IN: allantoin transport; LOCATED IN: endomembrane system; BEST Arabidopsis thaliana protein match is: ureide permease 2 (TAIR:AT2G03530.2); Has 283 Blast hi…	-6.67334	0.695294	7.66789e-07	0.00285528
41585	23.5.2	nucleotide metabolism.deoxynucleotide metabolism.pseudouridine synthase	|MERCATOR: (loc_os05g01750.1 : 159.0) no description available & (at5g14460 : 108.0) Pseudouridine synthase family protein; FUNCTIONS IN: pseudouridine synthase activity, transporter activity; INVOLVED IN: pseudouridine synthesis, RNA modification, RNA processing; LOCATED IN: chloroplast; EXPRESSED IN: 23 plant structures; EXPRESSED DURING: 14 growth stages; CONTAINS InterPro DOMAIN/s: Pseudourid…	2.73995	-0.156733	0.000440834	0.0432863
33437	24	Biodegradation of Xenobiotics	|MERCATOR: (loc_os07g44890.1 : 155.0) no description available & (at5g23530 : 65.5) carboxyesterase 18 (CXE18); CONTAINS InterPro DOMAIN/s: Alpha/beta hydrolase fold-3 (InterPro:IPR013094); BEST Arabidopsis thaliana protein match is: alpha/beta-Hydrolases superfamily protein (TAIR:AT5G27320.1); Has 1807 Blast hits to 1807 proteins in 277 species: Archae - 0; Bacteria - 0; Metazoa - 736; Fungi - 3…	5.94086	-0.549668	4.16305e-07	0.00214037
54333	24	Biodegradation of Xenobiotics	|MERCATOR: (loc_os07g44890.1 : 156.0) no description available & (at5g23530 : 82.8) carboxyesterase 18 (CXE18); CONTAINS InterPro DOMAIN/s: Alpha/beta hydrolase fold-3 (InterPro:IPR013094); BEST Arabidopsis thaliana protein match is: alpha/beta-Hydrolases superfamily protein (TAIR:AT5G27320.1); Has 1807 Blast hits to 1807 proteins in 277 species: Archae - 0; Bacteria - 0; Metazoa - 736; Fungi - 3…	5.00961	0.104946	7.35989e-05	0.0222364
330549	24	Biodegradation of Xenobiotics	|MERCATOR: (loc_os11g13670.1 : 130.0) no description available & (at5g23530 : 82.8) carboxyesterase 18 (CXE18); CONTAINS InterPro DOMAIN/s: Alpha/beta hydrolase fold-3 (InterPro:IPR013094); BEST Arabidopsis thaliana protein match is: alpha/beta-Hydrolases superfamily protein (TAIR:AT5G27320.1); Has 1807 Blast hits to 1807 proteins in 277 species: Archae - 0; Bacteria - 0; Metazoa - 736; Fungi - 3…	7.0924	-2.00605	0.000100315	0.0241662
54248	25.7	C1-metabolism.GTP cyclohydrolase I	|MERCATOR: (original description: no original description)||TAGI: BG606425;weakly similar to UniRef100_A1YZ52 Cluster: PdmP3; n=1; Actinomadura hibisca;Rep: PdmP3 - Actinomadura hibisca, partial (7%);Evalue=6E-115;%ident=93.03|MAPMANSTORE: weakly similar to UniRef100_A1YZ52 Cluster: PdmP3; n=1; Actinomadura hibisca;Rep: PdmP3 - Actinomadura hibisca, partial (7%)||BREAD.WHEAT.TIGR: BG606425; BG606…	4.76036	-0.868801	0.000279082	0.0356757
62425	26.2	misc.UDP glucosyl and glucoronyl transferases	|MERCATOR: (original description: no original description)||TAGI: TC387741;similar to UniRef100_Q9UQ39 Cluster: RNA binding protein; n=1; Homo sapiens;Rep: RNA binding protein - Homo sapiens (Human), partial (3%);Evalue=0;%ident=89.44|MAPMANSTORE: weakly similar to ( 158) loc_os01g73670 12001.m43391 protein expressed protein similar to UniRef100_Q9UQ39 Cluster: RNA binding protein; n=1; Homo sapi…	-2.992	3.73222	0.000297788	0.0370445
37617	26.5	misc.acyl transferases	|MERCATOR: (loc_os05g50510.1 : 157.0) no description available & (at5g46340 : 137.0) O-acetyltransferase family protein; CONTAINS InterPro DOMAIN/s: Cas1p-like (InterPro:IPR012419); BEST Arabidopsis thaliana protein match is: O-acetyltransferase family protein (TAIR:AT2G34410.2); Has 30201 Blast hits to 17322 proteins in 780 species: Archae - 12; Bacteria - 1396; Metazoa - 17338; Fungi - 3422; Pl…	-7.18425	-2.02073	0.000504915	0.0454548
259721	26.6	misc.O-methyl transferases	|MERCATOR: (loc_os11g20090.1 : 134.0) no description available & (p47917|zrp4_maize : 96.7) O-methyltransferase ZRP4 (EC 2.1.1.-) (OMT) - Zea mays (Maize) & (at4g35160 : 61.2) O-methyltransferase family protein; FUNCTIONS IN: methyltransferase activity, O-methyltransferase activity, protein dimerization activity; LOCATED IN: cytosol; CONTAINS InterPro DOMAIN/s: Winged helix-turn-helix transcripti…	-9.23552	-0.767284	0.000362848	0.0402333
37624	26.7	misc.oxidases - copper, flavone etc.	|MERCATOR: (loc_os04g41960.1 : 159.0) no description available & (at5g16980 : 150.0) Zinc-binding dehydrogenase family protein; FUNCTIONS IN: oxidoreductase activity, binding, zinc ion binding, catalytic activity; INVOLVED IN: response to oxidative stress, response to cyclopentenone; EXPRESSED IN: 11 plant structures; EXPRESSED DURING: LP.06 six leaves visible, LP.04 four leaves visible, 4 anthes…	-7.93033	-0.209064	0.00017823	0.0298085
52379	26.7	misc.oxidases - copper, flavone etc.	|MERCATOR: (loc_os08g02230.1 : 129.0) no description available & (at2g46740 : 122.0) D-arabinono-1,4-lactone oxidase family protein; FUNCTIONS IN: oxidoreductase activity, D-arabinono-1,4-lactone oxidase activity, FAD binding, catalytic activity; INVOLVED IN: oxidation reduction; LOCATED IN: cell wall; EXPRESSED IN: leaf apex, root; CONTAINS InterPro DOMAIN/s: D-arabinono-1,4-lactone oxidase (Int…	-4.67829	1.94292	4.40438e-06	0.00662958
63825	26.7	misc.oxidases - copper, flavone etc.	|MERCATOR: (loc_os07g30960.1 : 505.0) no description available & (at2g35660 : 415.0) Encodes a member of a novel gene family with homology to known proteins involved in hydroxylation and oxidation of an aromatic ring.; CTF2A; FUNCTIONS IN: monooxygenase activity; INVOLVED IN: oxidation reduction; CONTAINS InterPro DOMAIN/s: Monooxygenase, FAD-binding (InterPro:IPR002938); BEST Arabidopsis thalian…	2.01076	3.67539	0.000185694	0.0304644
119212	26.7	misc.oxidases - copper, flavone etc.	|MERCATOR: (loc_os12g12590.1 : 140.0) no description available & (at3g03080 : 123.0) Zinc-binding dehydrogenase family protein; FUNCTIONS IN: oxidoreductase activity, binding, zinc ion binding, catalytic activity; INVOLVED IN: oxidation reduction, metabolic process; LOCATED IN: cellular_component unknown; EXPRESSED IN: 8 plant structures; EXPRESSED DURING: L mature pollen stage, M germinated poll…	-9.68563	-0.341651	0.000205538	0.0318449
38190	26.9	misc.glutathione S transferases	|MERCATOR: (loc_os04g02850.1 : 339.0) no description available & (at3g57430 : 219.0) Encodes a chloroplast RNA editing factor.; ORGANELLE TRANSCRIPT PROCESSING 84 (OTP84); CONTAINS InterPro DOMAIN/s: Pentatricopeptide repeat (InterPro:IPR002885); BEST Arabidopsis thaliana protein match is: Pentatricopeptide repeat (PPR) superfamily protein (TAIR:AT1G11290.1); Has 46517 Blast hits to 13331 protein…	4.63486	-1.0757	0.000105552	0.0241662
3030	26.10	misc.cytochrome P450	|MERCATOR: (loc_os03g04640.1 : 129.0) no description available & (at4g39480 : 89.7) member of CYP96A; "cytochrome P450, family 96, subfamily A, polypeptide 9" (CYP96A9); FUNCTIONS IN: electron carrier activity, monooxygenase activity, iron ion binding, oxygen binding, heme binding; INVOLVED IN: oxidation reduction; LOCATED IN: endomembrane system; EXPRESSED IN: 15 plant structures; EXPRESSED DURI…	4.7666	-2.00466	9.67916e-05	0.0240815
31624	26.10	misc.cytochrome P450	|MERCATOR: (original description: no original description)||TAGI: TC392934;weakly similar to UniRef100_A7PY17 Cluster: Chromosome chr15 scaffold_37, whole genome shotgun sequence; n=1; Vitis vinifera;Rep: Chromosome chr15 scaffold_37, whole genome shotgun sequence - Vitis vinifera (Grape), partial (65%);Evalue=3E-152;%ident=100|MAPMANSTORE: moderately similar to ( 494) AT2G45510 ; Symbols: CYP704…	-7.80984	-0.46418	0.000600207	0.0498454
43740	26.10	misc.cytochrome P450	|MERCATOR: (loc_os10g08474.1 : 118.0) no description available & (at2g45560 : 76.6) cytochrome P450 monooxygenase; "cytochrome P450, family 76, subfamily C, polypeptide 1" (CYP76C1); FUNCTIONS IN: electron carrier activity, monooxygenase activity, iron ion binding, heme binding; INVOLVED IN: oxidation reduction; LOCATED IN: endomembrane system; EXPRESSED IN: 17 plant structures; EXPRESSED DURING:…	2.92702	0.174728	0.000567159	0.0479128
45443	26.10	misc.cytochrome P450	|MERCATOR: (loc_os03g45619.1 : 660.0) no description available & (q7xu38|c87a3_orysa : 474.0) Cytochrome P450 87A3 (EC 1.14.-.-) - Oryza sativa (Rice) & (at1g12740 : 436.0) encodes a protein with cytochrome P450 domain; "cytochrome P450, family 87, subfamily A, polypeptide 2" (CYP87A2); FUNCTIONS IN: electron carrier activity, monooxygenase activity, iron ion binding, oxygen binding, heme binding…	-11.53	1.46451	1.45648e-05	0.0101969
57096	26.10	misc.cytochrome P450	|MERCATOR: (loc_os02g38940.1 : 132.0) no description available & (o22307|c71db_lotja : 108.0) Cytochrome P450 71D11 (EC 1.14.-.-) (Fragment) - Lotus japonicus & (at2g02580 : 96.7) member of CYP71B; "cytochrome P450, family 71, subfamily B, polypeptide 9" (CYP71B9); FUNCTIONS IN: electron carrier activity, monooxygenase activity, iron ion binding, oxygen binding, heme binding; INVOLVED IN: oxidati…	-3.53895	0.134517	0.000195474	0.0313014
60009	26.10	misc.cytochrome P450	|MERCATOR: (loc_os01g12740.1 : 114.0) no description available & (o81970|c71a9_soybn : 83.6) Cytochrome P450 71A9 (EC 1.14.-.-) (P450 CP1) - Glycine max (Soybean) & (at3g26230 : 75.5) putative cytochrome P450; "cytochrome P450, family 71, subfamily B, polypeptide 24" (CYP71B24); FUNCTIONS IN: electron carrier activity, monooxygenase activity, iron ion binding, oxygen binding, heme binding; INVOLV…	2.30003	2.39477	0.000190871	0.0309762
63757	26.10	misc.cytochrome P450	|MERCATOR: (loc_os01g43750.1 : 620.0) no description available & (at3g14690 : 441.0) putative cytochrome P450; "cytochrome P450, family 72, subfamily A, polypeptide 15" (CYP72A15); FUNCTIONS IN: electron carrier activity, monooxygenase activity, iron ion binding, oxygen binding, heme binding; INVOLVED IN: response to cyclopentenone; LOCATED IN: endomembrane system; EXPRESSED IN: 22 plant structur…	-4.3123	3.20977	1.56503e-05	0.0105875
65049	26.10	misc.cytochrome P450	|MERCATOR: (loc_os08g01510.1 : 446.0) no description available & (q43257|c71c4_maize : 419.0) Cytochrome P450 71C4 (EC 1.14.-.-) (Benzoxazineless 2) - Zea mays (Maize) & (at3g48280 : 284.0) putative cytochrome P450; "cytochrome P450, family 71, subfamily A, polypeptide 25" (CYP71A25); FUNCTIONS IN: electron carrier activity, monooxygenase activity, iron ion binding, oxygen binding, heme binding; …	-6.14339	3.44826	0.000378183	0.0411011
220142	26.11	misc.alcohol dehydrogenases	|MERCATOR: (original description: no original description)||BREAD.WHEAT.TIGR: TA106457_4565; Hypothetical protein [Oryza sativa (Rice)]; Evalue=0; %ident=100||BRACHYPODIUM GENOME: Bradi4g36090.1 ; weakly similar to ( 125) loc_os05g05370 12005.m05064 protein hypothetical protein no original description||RICE GENOME: Loc_Os05g05370.1 ; 12005.m05064 protein hypothetical protein|	-10.2142	0.164325	4.86387e-05	0.0178566
43894	26.13	misc.acid and other phosphatases	|MERCATOR: (loc_os01g47580.1 : 340.0) no description available & (at1g15080 : 270.0) Encodes phosphatidic acid phosphatase. Involved in ABA signaling. Functions as a negative regulator upstream of ABI4. Expressed during germination and seed development. Expressed overall in young seedlings, in roots, hypocotyls, and vascular cells of cotyledons and leaves of 10 day-old seedlings, in flower filame…	-2.61655	-0.454097	0.000358369	0.0401
55743	26.16	misc.myrosinases-lectin-jacalin	|MERCATOR: (loc_os05g13770.1 : 120.0) no description available & (at2g37710 : 119.0) Induced in response to Salicylic acid.; receptor lectin kinase (RLK); FUNCTIONS IN: kinase activity; INVOLVED IN: response to salicylic acid stimulus; LOCATED IN: plasma membrane; EXPRESSED IN: 23 plant structures; EXPRESSED DURING: 13 growth stages; CONTAINS InterPro DOMAIN/s: Legume lectin, beta chain (InterPro…	-9.41659	-0.585396	0.000368349	0.0404706
60620	26.22	misc.short chain dehydrogenase/reductase (SDR)	|MERCATOR: (loc_os07g40250.1 : 253.0) no description available & (at3g26760 : 197.0) NAD(P)-binding Rossmann-fold superfamily protein; FUNCTIONS IN: oxidoreductase activity, zinc ion binding; INVOLVED IN: oxidation reduction, metabolic process; EXPRESSED IN: 21 plant structures; EXPRESSED DURING: 13 growth stages; CONTAINS InterPro DOMAIN/s: NAD(P)-binding domain (InterPro:IPR016040), Glucose/rib…	4.13492	0.672274	0.000234431	0.0331534
53913	26.24	misc.GCN5-related N-acetyltransferase	|MERCATOR: (loc_os05g44020.3 : 145.0) no description available & (gnl|cdd|36139 : 53.8) no description available & (at4g19985 : 42.0) Acyl-CoA N-acyltransferases (NAT) superfamily protein; FUNCTIONS IN: N-acetyltransferase activity; INVOLVED IN: N-terminal protein myristoylation, metabolic process; EXPRESSED IN: 23 plant structures; EXPRESSED DURING: 15 growth stages; CONTAINS InterPro DOMAIN/s: …	3.77767	-0.367635	4.29175e-05	0.0165642
22791	26.28	misc.GDSL-motif lipase	|MERCATOR: (original description: no original description)||TAGI: TC437944;;Evalue=2E-72;%ident=91.54|MAPMANSTORE: very weakly similar to (99.8) loc_os06g47910 12006.m09317 protein alpha-L-fucosidase 2 precursor, putative, expressed||BREAD.WHEAT.TIGR: TA103883_4565; TA103883_4565; Evalue=3E-72; %ident=91.54|	-8.92834	-1.04556	0.000562559	0.0477212
43827	26.28	misc.GDSL-motif lipase	|MERCATOR: (loc_os06g34070.1 : 91.3) no description available & (at5g45910 : 67.4) GDSL-like Lipase/Acylhydrolase superfamily protein; FUNCTIONS IN: hydrolase activity, acting on ester bonds, carboxylesterase activity; INVOLVED IN: lipid metabolic process; LOCATED IN: endomembrane system; EXPRESSED IN: 9 plant structures; EXPRESSED DURING: 4 anthesis, C globular stage, D bilateral stage; CONTAINS…	8.21887	-1.18322	6.49755e-06	0.00798686
41173	26.30	misc. other Ferredoxins and Rieske domain	|MERCATOR: (loc_os03g59120.1 : 84.0) no description available & (at4g25650 : 56.6) Similar to ACD1. Leaves of antisense ACD1-like plants turn yellow in darkness like wild-type whereas antisense ACD1 plants remain dark after five days of dark treatment.; ACD1-like (ACD1-LIKE); FUNCTIONS IN: electron carrier activity, oxidoreductase activity, 2 iron, 2 sulfur cluster binding, chlorophyllide a oxyge…	4.83506	1.08995	9.2307e-07	0.00290333
41992	26.30	misc. other Ferredoxins and Rieske domain	|MERCATOR: (original description: no original description)||TAGI: BE213521;homologue to UniRef100_Q0DMJ4 Cluster: Os03g0805600 protein; n=1; Oryza sativa Japonica Group;Rep: Os03g0805600 protein - Oryza sativa subsp. japonica (Rice), partial (17%);Evalue=2E-124;%ident=93.96|MAPMANSTORE: weakly similar to ( 165) AT4G25650 ; Symbols: ACD1-LIKE ; ACD1-LIKE (ACD1-LIKE); 2 iron, 2 sulfur cluster bindi…	5.83757	0.880762	0.000128952	0.0257943
35879	27.1.1	RNA.processing.splicing	|MERCATOR: (original description: no original description)||TAGI: TC373601;weakly similar to UniRef100_A6ZWE8 Cluster: Conserved protein; n=1; Saccharomyces cerevisiae YJM789;Rep: Conserved protein - Saccharomyces cerevisiae (strain YJM789) (Baker's yeast), partial (4%);Evalue=0;%ident=99.78|MAPMANSTORE: weakly similar to ( 118) loc_os01g73656 12001.m42510 protein expressed protein weakly similar…	-9.02853	-0.945888	0.000512121	0.0455454
41689	27.1.1	RNA.processing.splicing	|MERCATOR: (loc_os02g05310.4 : 121.0) no description available & (at5g64270 : 76.6) splicing factor, putative; FUNCTIONS IN: binding; INVOLVED IN: mRNA processing; LOCATED IN: chloroplast; EXPRESSED IN: 26 plant structures; EXPRESSED DURING: 15 growth stages; CONTAINS InterPro DOMAIN/s: HEAT (InterPro:IPR000357), Armadillo-like helical (InterPro:IPR011989), Splicing factor 3B subunit 1 (InterPro:…	3.33909	-0.998975	0.000478202	0.0447082
70284	27.1.2	RNA.processing.RNA helicase	|MERCATOR: (loc_os11g44840.1 : 129.0) no description available & (at5g08020 : 57.0) Encodes a homolog of Replication Protein A. rpa70b mutants are hypersensitive to UV-B radiation and MMS treatments suggesting a role for this protein in DNA damage repair.; RPA70-kDa subunit B (RPA70B); FUNCTIONS IN: DNA binding, nucleic acid binding; INVOLVED IN: DNA repair, response to UV-B, DNA replication; LOC…	-2.58947	4.11277	0.000359505	0.0401
32645	27.1.19	RNA.processing.ribonucleases	|MERCATOR: (loc_os01g62440.1 : 52.4) no description available & (gnl|cdd|38301 : 48.1) no description available & (at5g02250 : 44.7) Encodes a exoribonuclease involved in rRNA processing in mitochondria and chloroplasts.Loss of function mutations are pale green and require supplementation with sucrose for germination and early development. Plants are pale green due to defects in chloroplast bioge…	-7.90338	-0.310346	0.000345443	0.0398444
42761	27.1.19	RNA.processing.ribonucleases	|MERCATOR: (original description: no original description)||TAGI: TC384453;similar to UniRef100_A7PNN2 Cluster: Chromosome chr8 scaffold_23, whole genome shotgun sequence; n=1; Vitis vinifera;Rep: Chromosome chr8 scaffold_23, whole genome shotgun sequence - Vitis vinifera (Grape), partial (5%);Evalue=0;%ident=96.68|MAPMANSTORE: similar to UniRef100_A7PNN2 Cluster: Chromosome chr8 scaffold_23, who…	-8.94894	-1.02716	0.000549672	0.0477212
62267	27.1.19	RNA.processing.ribonucleases	|MERCATOR: (loc_os08g33710.1 : 363.0) no description available & (at2g02990 : 296.0) member of the ribonuclease T2 family, responds to inorganic phosphate starvation, and inhibits production of anthocyanin. Also involved in wound-induced signaling independent of jasmonic acid.; ribonuclease 1 (RNS1); FUNCTIONS IN: ribonuclease activity, endoribonuclease activity; INVOLVED IN: cellular response to…	2.89686	3.50147	2.5056e-05	0.0133085
3929	27.2	RNA.transcription	|MERCATOR: (original description: no original description)||TAGI: BQ239811;weakly similar to UniRef100_Q0DHM6 Cluster: Os05g0456700 protein; n=1; Oryza sativa Japonica Group;Rep: Os05g0456700 protein - Oryza sativa subsp. japonica (Rice), partial (17%);Evalue=0;%ident=99.47|MAPMANSTORE: weakly similar to ( 181) loc_os10g40890 12010.m06857 protein retrotransposon protein, putative, unclassified we…	-8.91369	-1.048	0.000360313	0.0401
43241	27.2	RNA.transcription	|MERCATOR: (original description: no original description)||BRACHYPODIUM GENOME: Bradi1g64840.1 ; weakly similar to ( 164) loc_os03g18880 12003.m07308 protein retrotransposon protein, putative, unclassified, expressed no original description||RICE GENOME: Loc_Os02g27720.1 ; 12002.m07916 protein retrotransposon protein, putative, unclassified|	-5.67109	-1.33808	8.84203e-05	0.0236979
43884	27.2	RNA.transcription	|MERCATOR: (original description: no original description)||TAGI: TC414715;weakly similar to UniRef100_Q0JEM3 Cluster: Os04g0243500 protein; n=1; Oryza sativa Japonica Group;Rep: Os04g0243500 protein - Oryza sativa subsp. japonica (Rice), partial (16%);Evalue=0;%ident=99.93|MAPMANSTORE: moderately similar to ( 427) loc_os06g15570 12006.m32042 protein retrotransposon protein, putative, unclassifie…	-9.96121	1.62244	0.000103983	0.0241662
50624	27.2	RNA.transcription	|MERCATOR: (loc_os09g17800.1 : 137.0) no description available & (at3g29750 : 48.1) Eukaryotic aspartyl protease family protein; FUNCTIONS IN: aminoacyl-tRNA ligase activity, nucleotide binding, ATP binding; INVOLVED IN: translation, tRNA aminoacylation for protein translation; LOCATED IN: cytoplasm; CONTAINS InterPro DOMAIN/s: Aminoacyl-tRNA synthetase, class II (D/K/N)-like (InterPro:IPR018150)…	-9.46304	1.18563	3.0976e-05	0.0140228
52579	27.2	RNA.transcription	|MERCATOR: (original description: no original description)||TAGI: TC412608;similar to UniRef100_A1KP35 Cluster: PE_PGRS50 protein; n=1; Mycobacterium bovis BCG str. Pasteur 1173P2;Rep: PE_PGRS50 protein - Mycobacterium bovis (strain BCG / Paris 1173P2), partial (4%);Evalue=0;%ident=99.5|MAPMANSTORE: similar to UniRef100_A1KP35 Cluster: PE_PGRS50 protein; n=1; Mycobacterium bovis BCG str. Pasteur …	3.97509	-0.063163	0.000132063	0.0261259
53371	27.3.6	RNA.regulation of transcription.bHLH,Basic Helix-Loop-Helix family	|MERCATOR: (original description: no original description)||TAGI: CV766597;;Evalue=0;%ident=99.75|MAPMANSTORE: weakly similar to ( 120) loc_os01g67480 12001.m12852 protein helix-loop-helix DNA-binding domain containing protein, expressed||BREAD.WHEAT.TIGR: CV766597; CV766597; Evalue=0; %ident=99.75||BRACHYPODIUM GENOME: Bradi2g57800.1 ; weakly similar to ( 140) AT1G05805 | Symbols: | basic helix-…	5.75038	0.386621	4.07244e-05	0.0159503
48031	27.3.8	RNA.regulation of transcription.C2C2(Zn) DOF zinc finger family	|MERCATOR: (original description: no original description)||DURUM.WHEAT.TIGR: AJ716818; Dof zinc finger protein [Oryza sativa (Rice)]; Evalue=2E-144; %ident=98.94||BRACHYPODIUM GENOME: Bradi5g18640.1 ; weakly similar to ( 114) AT4G24060 | Symbols: | Dof-type zinc finger domain-containing protein | chr4:12503970-12505417 FORWARDvery weakly similar to ( 100) PBF_MAIZE Dof zinc finger protein PBF (P…	7.09956	-2.12787	0.000262883	0.0349403
45338	27.3.9	RNA.regulation of transcription.C2C2(Zn) GATA transcription factor family	|MERCATOR: (original description: no original description)||TAGI: TC380017;homologue to UniRef100_A3RL35 Cluster: GATA-type zinc finger protein; n=1; Triticum aestivum;Rep: GATA-type zinc finger protein - Triticum aestivum (Wheat), complete;Evalue=6E-67;%ident=97.33|MAPMANSTORE: weakly similar to ( 160) AT3G21175 ; Symbols: ZML1 ; ZML1 (ZIM-LIKE 1); transcription factor ; chr3:7422832-7423765 FOR…	3.83577	-0.972372	0.000326893	0.038897
61112	27.3.22	RNA.regulation of transcription.HB,Homeobox transcription factor family	|MERCATOR: (loc_os10g39030.1 : 225.0) no description available & (at2g23760 : 90.9) Encodes a member of the BEL family of homeodomain proteins. Plants doubly mutant for saw1/saw2 (blh2/blh4) have serrated leaves. BP is expressed in the serrated leaves, therefore saw2 and saw1 may act redundantly to repress BP in leaves.; BEL1-like homeodomain 4 (BLH4); FUNCTIONS IN: DNA binding, sequence-specific…	2.61635	2.03823	0.00022175	0.032925
1047	27.3.24	RNA.regulation of transcription.MADS box transcription factor family	|MERCATOR: (original description: no original description)||TAGI: TC375063;UniRef100_Q1G193 Cluster: MADS-box transcription factor TaAGL11; n=1; Triticum aestivum;Rep: MADS-box transcription factor TaAGL11 - Triticum aestivum (Wheat), complete;Evalue=5E-125;%ident=97.38|MAPMANSTORE: moderately similar to ( 215) AT2G22540 ; Symbols: SVP, AGL22 ; SVP (SHORT VEGETATIVE PHASE); transcription factor/ …	3.61065	-0.944444	0.000231244	0.0331534
50680	27.3.27	RNA.regulation of transcription.NAC domain transcription factor family	|MERCATOR: (loc_os02g57650.1 : 109.0) no description available & (at3g10490 : 73.9) NAC domain containing protein 52 (NAC052); FUNCTIONS IN: sequence-specific DNA binding transcription factor activity; INVOLVED IN: multicellular organismal development, pollen development; LOCATED IN: nucleolus; CONTAINS InterPro DOMAIN/s: No apical meristem (NAM) protein (InterPro:IPR003441); BEST Arabidopsis tha…	3.55421	0.214177	0.000250691	0.0341582
47620	27.3.32	RNA.regulation of transcription.WRKY domain transcription factor family	|MERCATOR: (loc_os04g51560.1 : 117.0) no description available & (at4g31550 : 66.6) member of WRKY Transcription Factor; Group II-d; negative regulator of basal resistance to Pseudomonas syringae.; WRKY DNA-binding protein 11 (WRKY11); CONTAINS InterPro DOMAIN/s: DNA-binding WRKY (InterPro:IPR003657), Transcription factor, WRKY, Zn-cluster (InterPro:IPR018872); BEST Arabidopsis thaliana protein m…	4.68458	-1.11686	0.000341849	0.0397145
52953	27.3.36	RNA.regulation of transcription.Argonaute	|MERCATOR: (original description: no original description)||BRACHYPODIUM GENOME: Bradi1g02050.1 ; weakly similar to ( 125) AT2G27880 | Symbols: AGO5 | AGO5 (ARGONAUTE 5); nucleic acid binding | chr2:11871488-11876712 FORWARDmoderately similar to ( 216) loc_os03g58600 12003.m10765 protein argonaute-like protein, putative, expressedPAZ_argonaute_like no original description||RICE GENOME: Loc_Os09g3…	-9.89902	1.71689	0.000107245	0.0243665
41584	27.3.39	RNA.regulation of transcription.AtSR Transcription Factor family	|MERCATOR: (original description: no original description)||BRACHYPODIUM GENOME: Bradi1g71810.2 ; highly similar to ( 785) AT5G64220 | Symbols: | calmodulin-binding protein | chr5:25686434-25691903 FORWARDnearly identical (1593) loc_os03g09100 12003.m06416 protein calmodulin-binding transcription activator 2, putative, expressed CG-1 no original description||RICE GENOME: Loc_Os03g09100.1 ; 12003.…	2.47038	-0.453605	0.000349585	0.0401
32533	27.3.44	RNA.regulation of transcription.Chromatin Remodeling Factors	|MERCATOR: (original description: no original description)||TAGI: TC410434;similar to UniRef100_Q2QQ44 Cluster: SWIB/MDM2 domain containing protein, expressed; n=1; Oryza sativa Japonica Group;Rep: SWIB/MDM2 domain containing protein, expressed - Oryza sativa subsp. japonica (Rice), partial (63%);Evalue=8E-129;%ident=98.84|MAPMANSTORE: weakly similar to ( 108) AT2G14880 ; Symbols: ; SWIB complex …	5.14274	-0.0484882	0.000117567	0.0252807
48135	27.3.46	RNA.regulation of transcription.DNA methyltransferases	|MERCATOR: (at4g14140 : 70.5) This gene is predicted to encode a DNA methyltransferase. A plant line expressing an RNAi construct directed against DMT2 has reduced agrobacterium-mediated tumor formation.; DNA methyltransferase 2 (DMT2); FUNCTIONS IN: DNA binding, DNA (cytosine-5-)-methyltransferase activity; INVOLVED IN: DNA mediated transformation, DNA methylation; LOCATED IN: nucleus; CONTAINS …	-4.37404	-0.188819	0.00013525	0.0264392
63819	27.3.49	RNA.regulation of transcription.GeBP like	|MERCATOR: (gnl|cdd|38301 : 58.5) no description available & (loc_os12g13940.1 : 55.5) no description available & (at5g14280 : 45.4) DNA-binding storekeeper protein-related; FUNCTIONS IN: transcription regulator activity; INVOLVED IN: biological_process unknown; LOCATED IN: integral to membrane; CONTAINS InterPro DOMAIN/s: Protein of unknown function DUF573 (InterPro:IPR007592), TRAM/LAG1/CLN8 ho…	2.07221	0.915012	5.32437e-05	0.0190812
23549	27.3.55	RNA.regulation of transcription.HDA	|MERCATOR: (loc_os07g41090.3 : 154.0) no description available & (at5g61060 : 141.0) Encodes a member of the histone deacetylase family.; histone deacetylase 5 (HDA05); FUNCTIONS IN: histone deacetylase activity; INVOLVED IN: histone deacetylation; LOCATED IN: nucleus, cytoplasm; EXPRESSED IN: 22 plant structures; EXPRESSED DURING: 13 growth stages; CONTAINS InterPro DOMAIN/s: Histone deacetylase…	-8.42491	-1.46876	0.000312344	0.0379918
54478	27.3.64	RNA.regulation of transcription.PHOR1	|MERCATOR: (loc_os05g36360.1 : 169.0) no description available & (at3g18710 : 92.4) Encodes a protein containing a U-box and an ARM domain. This protein has E3 ubiquitin ligase activity based on in vitro assays.; plant U-box 29 (PUB29); FUNCTIONS IN: ubiquitin-protein ligase activity; INVOLVED IN: response to chitin, protein ubiquitination; LOCATED IN: ubiquitin ligase complex; EXPRESSED IN: 22 p…	4.4983	-0.883063	0.000460224	0.0437751
62474	27.3.67	RNA.regulation of transcription.putative transcription regulator	|MERCATOR: (loc_os02g49670.1 : 65.5) no description available & (gnl|cdd|36433 : 53.1) no description available & (at1g75560 : 41.6) zinc knuckle (CCHC-type) family protein; FUNCTIONS IN: zinc ion binding, nucleic acid binding; INVOLVED IN: biological_process unknown; LOCATED IN: chloroplast; EXPRESSED IN: 23 plant structures; EXPRESSED DURING: 15 growth stages; CONTAINS InterPro DOMAIN/s: Zinc f…	-3.16988	3.00128	9.02773e-05	0.0237271
7734	27.3.99	RNA.regulation of transcription.unclassified	|MERCATOR: (loc_os12g40530.1 : 132.0) no description available & (gnl|cdd|36433 : 48.5) no description available & (at1g49920 : 42.7) MuDR family transposase; FUNCTIONS IN: zinc ion binding; INVOLVED IN: biological_process unknown; LOCATED IN: cellular_component unknown; EXPRESSED IN: flower; EXPRESSED DURING: petal differentiation and expansion stage; CONTAINS InterPro DOMAIN/s: MULE transposase…	3.70677	-1.98804	0.000148538	0.0276796
20859	27.3.99	RNA.regulation of transcription.unclassified	|MERCATOR: (original description: no original description)||TAGI: TC383167;weakly similar to UniRef100_Q6QPD1 Cluster: E3 25.4 kDa; n=1; Simian adenovirus 23;Rep: E3 25.4 kDa - Simian adenovirus 23, partial (10%);Evalue=0;%ident=100|MAPMANSTORE: weakly similar to UniRef100_Q6QPD1 Cluster: E3 25.4 kDa; n=1; Simian adenovirus 23;Rep: E3 25.4 kDa - Simian adenovirus 23, partial (10%)||BREAD.WHEAT.TI…	-7.57609	0.12133	0.000522472	0.0461931
39970	27.3.99	RNA.regulation of transcription.unclassified	|MERCATOR: (original description: no original description)||TAGI: TC371797;weakly similar to UniRef100_A7QNV6 Cluster: Chromosome chr1 scaffold_135, whole genome shotgun sequence; n=1; Vitis vinifera;Rep: Chromosome chr1 scaffold_135, whole genome shotgun sequence - Vitis vinifera (Grape), partial (73%);Evalue=4E-110;%ident=100|MAPMANSTORE: weakly similar to ( 154) AT1G10590 ; Symbols: ; DNA-bind…	-8.75898	-1.18257	0.000459218	0.0437751
42564	27.3.99	RNA.regulation of transcription.unclassified	|MERCATOR: (loc_os08g16770.1 : 300.0) no description available & (at1g64260 : 92.4) MuDR family transposase; FUNCTIONS IN: zinc ion binding; INVOLVED IN: biological_process unknown; LOCATED IN: cellular_component unknown; EXPRESSED IN: shoot apex, embryo, leaf whorl, flower, seed; EXPRESSED DURING: F mature embryo stage, petal differentiation and expansion stage, E expanded cotyledon stage, D bil…	-5.39792	1.59645	0.00025144	0.0341737
53382	27.3.99	RNA.regulation of transcription.unclassified	|MERCATOR: (at2g27660 : 65.9) Cysteine/Histidine-rich C1 domain family protein; FUNCTIONS IN: zinc ion binding; LOCATED IN: chloroplast; EXPRESSED IN: 12 plant structures; EXPRESSED DURING: 9 growth stages; CONTAINS InterPro DOMAIN/s: DC1 (InterPro:IPR004146), Zinc finger, ZZ-type (InterPro:IPR000433), C1-like (InterPro:IPR011424); BEST Arabidopsis thaliana protein match is: Cysteine/Histidine-ri…	-4.75515	2.10538	8.31276e-06	0.00844139
65659	27.3.99	RNA.regulation of transcription.unclassified	|MERCATOR: (loc_os03g24590.1 : 372.0) no description available & (at2g36000 : 163.0) Mitochondrial transcription termination factor family protein; FUNCTIONS IN: molecular_function unknown; INVOLVED IN: biological_process unknown; LOCATED IN: chloroplast; EXPRESSED IN: 20 plant structures; EXPRESSED DURING: 13 growth stages; CONTAINS InterPro DOMAIN/s: Mitochodrial transcription termination facto…	2.09839	3.12775	0.000104533	0.0241662
42683	28.1.1	DNA.synthesis/chromatin structure.retrotransposon/transposase	|MERCATOR: (loc_os02g03640.1 : 334.0) no description available & (at3g30200 : 70.9) Plant transposase (Ptta/En/Spm family); FUNCTIONS IN: molecular_function unknown; INVOLVED IN: biological_process unknown; LOCATED IN: cellular_component unknown; EXPRESSED IN: cultured cell; CONTAINS InterPro DOMAIN/s: Transposase, Ptta/En/Spm, plant (InterPro:IPR004252); BEST Arabidopsis thaliana protein match i…	-9.34336	1.15776	0.000103986	0.0241662
40389	28.1	DNA.synthesis/chromatin structure	|MERCATOR: (loc_os02g32670.1 : 89.7) no description available & (gnl|cdd|36433 : 48.9) no description available & (gnl|cdd|34516 : 43.5) no description available & (at5g45400 : 40.0) RPA70C; FUNCTIONS IN: DNA binding, zinc ion binding, nucleic acid binding; INVOLVED IN: DNA replication; LOCATED IN: nucleus; EXPRESSED IN: 13 plant structures; EXPRESSED DURING: 8 growth stages; CONTAINS InterPro DO…	-9.66444	-0.338534	6.55241e-05	0.0205526
43272	28.1	DNA.synthesis/chromatin structure	|MERCATOR: (loc_os02g47150.1 : 88.2) no description available & (at3g23890 : 80.1) Encodes a topoisomerase II that is highly expressed in young seedlings. The protein is localized in the nucleus and gene expression levels are increased in proliferative tissues.; topoisomerase II (TOPII); CONTAINS InterPro DOMAIN/s: DNA topoisomerase, type IIA, subunit A/C-terminal (InterPro:IPR002205), DNA topois…	-9.01878	-0.955173	0.000209089	0.0319518
49389	28.1	DNA.synthesis/chromatin structure	|MERCATOR: (loc_os12g06230.1 : 113.0) no description available & (gnl|cdd|38301 : 53.9) no description available & (at2g05642 : 44.7) Nucleic acid-binding, OB-fold-like protein; CONTAINS InterPro DOMAIN/s: Nucleic acid-binding, OB-fold (InterPro:IPR012340), Nucleic acid-binding, OB-fold-like (InterPro:IPR016027), Protein of unknown function DUF223 (InterPro:IPR003871), Replication factor A, C-ter…	-7.73766	1.04702	0.000269448	0.0351914
48687	28.2	DNA.repair	|MERCATOR: (loc_os02g40200.2 : 254.0) no description available & (at3g47090 : 143.0) Leucine-rich repeat protein kinase family protein; FUNCTIONS IN: protein serine/threonine kinase activity, kinase activity, ATP binding; INVOLVED IN: transmembrane receptor protein tyrosine kinase signaling pathway, protein amino acid phosphorylation; LOCATED IN: chloroplast; CONTAINS InterPro DOMAIN/s: Protein k…	-4.59633	1.29197	6.6605e-05	0.0205526
7042	28.99	DNA.unspecified	|MERCATOR: (loc_os07g48470.1 : 162.0) no description available & (at4g29090 : 82.0) Ribonuclease H-like superfamily protein; FUNCTIONS IN: RNA binding, RNA-directed DNA polymerase activity, nucleic acid binding; INVOLVED IN: RNA-dependent DNA replication; LOCATED IN: endomembrane system; CONTAINS InterPro DOMAIN/s: Polynucleotidyl transferase, ribonuclease H fold (InterPro:IPR012337), RNA-directe…	-7.62079	0.106965	0.000275637	0.0356752
31618	28.99	DNA.unspecified	|MERCATOR: (loc_os01g01770.1 : 59.7) no description available & (at5g40310 : 54.3) Exonuclease family protein; FUNCTIONS IN: zinc ion binding, exonuclease activity, nucleic acid binding; INVOLVED IN: biological_process unknown; LOCATED IN: intracellular; CONTAINS InterPro DOMAIN/s: Zinc finger, C2H2-like (InterPro:IPR015880), Exonuclease (InterPro:IPR006055), Polynucleotidyl transferase, ribonucl…	2.82717	-0.739801	0.00014618	0.0275042
34746	28.99	DNA.unspecified	|MERCATOR: (original description: no original description)||TAGI: TC383358;weakly similar to UniRef100_A8J7Y3 Cluster: Predicted protein; n=1; Chlamydomonas reinhardtii;Rep: Predicted protein - Chlamydomonas reinhardtii, partial (4%);Evalue=0;%ident=99.83|MAPMANSTORE: very weakly similar to (85.1) loc_os04g04390 12004.m05745 protein retrotransposon protein, putative, unclassified, expressed weakl…	-9.67156	-0.356012	3.33581e-06	0.00576177
39603	28.99	DNA.unspecified	|MERCATOR: (loc_os06g13740.1 : 306.0) no description available & (at4g38180 : 189.0) FAR1-related sequence 5 (FRS5); FUNCTIONS IN: zinc ion binding; INVOLVED IN: response to red or far red light; LOCATED IN: cellular_component unknown; EXPRESSED IN: 22 plant structures; EXPRESSED DURING: 13 growth stages; CONTAINS InterPro DOMAIN/s: MULE transposase, conserved domain (InterPro:IPR018289), Transcr…	-10.2478	0.196856	0.000120686	0.0254141
44824	28.99	DNA.unspecified	|MERCATOR: (loc_os02g47920.1 : 127.0) no description available & (at3g27970 : 118.0) Exonuclease family protein; FUNCTIONS IN: zinc ion binding, exonuclease activity, nucleic acid binding; INVOLVED IN: biological_process unknown; LOCATED IN: intracellular; CONTAINS InterPro DOMAIN/s: Zinc finger, C2H2-like (InterPro:IPR015880), Exonuclease (InterPro:IPR006055), Polynucleotidyl transferase, ribonu…	6.5164	-1.67836	6.60778e-05	0.0205526
48828	28.99	DNA.unspecified	|MERCATOR: (original description: no original description)||TAGI: TC429915;;Evalue=0;%ident=99.09|MAPMANSTORE: 0||DURUM.WHEAT.TIGR: AJ610866; helicase-like protein [Oryza sativa (japonica cultivar-group)]; Evalue=3E-159; %ident=98.42||BREAD.WHEAT.TIGR: TA85698_4565; TA85698_4565; Evalue=0; %ident=99.09||BRACHYPODIUM GENOME: Bradi1g19327.1 ; weakly similar to ( 168) AT5G28780 | Symbols: | unknown …	6.15089	0.431225	1.05057e-05	0.00903621
56249	28.99	DNA.unspecified	|MERCATOR: (loc_os01g38620.2 : 180.0) no description available & (at2g25910 : 155.0) 3-5' exonuclease domain-containing protein / K homology domain-containing protein / KH domain-containing protein; FUNCTIONS IN: 3'-5' exonuclease activity, RNA binding, nucleic acid binding; INVOLVED IN: nucleobase, nucleoside, nucleotide and nucleic acid metabolic process; LOCATED IN: intracellular; EXPRESSED IN…	-11.4006	1.33339	3.52924e-05	0.0146003
60019	28.99	DNA.unspecified	|MERCATOR: (loc_os10g34860.1 : 379.0) no description available & (p08770|tra1_maize : 186.0) Putative AC transposase (ORFA) - Zea mays (Maize) & (at3g42170 : 152.0) transposase-like gene with conserved domains from the family of hAT transposases that includes hobo from Drosophila melanogaster, Activator (Ac) from maize, and Tam3 from snapdragon but lacks several amino acids known to be essential …	-9.79855	1.4652	6.43535e-05	0.0205526
60146	28.99	DNA.unspecified	|MERCATOR: (original description: no original description)||TAGI: TC386257;;Evalue=0;%ident=98.78|MAPMANSTORE: weakly similar to ( 107) loc_os10g12174 12010.m04531 protein retrotransposon protein, putative, unclassified, expressed||BREAD.WHEAT.TIGR: TA55139_4565; TA55139_4565; Evalue=0; %ident=100||BRACHYPODIUM GENOME: Bradi1g19327.1 ; weakly similar to ( 168) AT5G28780 | Symbols: | unknown prote…	-3.46257	2.71116	0.000507244	0.0454548
129526	28.99	DNA.unspecified	|MERCATOR: (loc_os01g07200.1 : 155.0) no description available & (at3g56170 : 108.0) Encodes a calcium-dependent nuclease with similarity to staphylococcal nuclease.; Ca-2+ dependent nuclease (CAN); FUNCTIONS IN: nuclease activity; INVOLVED IN: N-terminal protein myristoylation; EXPRESSED IN: 22 plant structures; EXPRESSED DURING: 13 growth stages; CONTAINS InterPro DOMAIN/s: Staphylococcal nucle…	4.81952	-1.71756	0.000359959	0.0401
358008	28.99	DNA.unspecified	|MERCATOR: (loc_os06g13740.1 : 84.0) no description available & (at4g15090 : 53.1) Encodes a nuclear localized protein involved in far red light response signaling. Loss of function mutants are defective in far red light responses. Interacts with homologous gene FHY3.; FAR-RED IMPAIRED RESPONSE 1 (FAR1); CONTAINS InterPro DOMAIN/s: MULE transposase, conserved domain (InterPro:IPR018289), Zinc fin…	-9.29305	-0.714327	0.000334976	0.039315
10501	29.1.16	protein.aa activation.cysteine-tRNA ligase	|MERCATOR: (loc_os03g04960.5 : 51.2) no description available & (at2g31170 : 45.4) SYCO ARATH; FUNCTIONS IN: cysteine-tRNA ligase activity, nucleotide binding, aminoacyl-tRNA ligase activity, ATP binding; INVOLVED IN: cysteinyl-tRNA aminoacylation, translation, tRNA aminoacylation for protein translation; LOCATED IN: mitochondrion, chloroplast; EXPRESSED IN: 21 plant structures; EXPRESSED DURING:…	6.33824	-1.13191	0.000222111	0.032925
56219	29.1	protein.aa activation	|MERCATOR: (at4g05050 : 172.0) polyubiquitin gene, belongs to a subtype group with UBQ10 and UBQ14. Various ecotypes of Arabidopsis have different numbers of ubiquitin repeats within this gene.; ubiquitin 11 (UBQ11); INVOLVED IN: protein modification process, response to salt stress, ubiquitin-dependent protein catabolic process; LOCATED IN: intracellular; EXPRESSED IN: 24 plant structures; EXPRE…	10.2059	0.337344	0.000221571	0.032925
49669	29.2.1.1.1.2.86	protein.synthesis.ribosomal protein.prokaryotic.chloroplast.50S subunit.PSRP6	|MERCATOR: (loc_os11g34940.1 : 120.0) no description available & (p82411|psrp6_spiol : 94.0) Plastid-specific 50S ribosomal protein 6, chloroplast precursor (PSRP-6) (CL25) - Spinacia oleracea (Spinach) & (at5g17870 : 87.0) plastid-specific ribosomal protein 6 precursor (Psrp-6) - like; plastid-specific 50S ribosomal protein 6 (PSRP6); FUNCTIONS IN: structural constituent of ribosome, rRNA bindin…	2.61975	2.35916	2.58066e-05	0.0133085
68068	29.2.1.1.3.1.5	protein.synthesis.ribosomal protein.prokaryotic.unknown organellar.30S subunit.S5	|MERCATOR: (original description: no original description)||TAGI: TC404621;weakly similar to UniRef100_A7PJH9 Cluster: Chromosome chr12 scaffold_18, whole genome shotgun sequence; n=1; Vitis vinifera;Rep: Chromosome chr12 scaffold_18, whole genome shotgun sequence - Vitis vinifera (Grape), partial (5%);Evalue=0;%ident=97.54|MAPMANSTORE: weakly similar to UniRef100_A7PJH9 Cluster: Chromosome chr12…	-7.58051	2.21236	4.04797e-05	0.0159503
428841	29.2.1.2.1.8	protein.synthesis.ribosomal protein.eukaryotic.40S subunit.S8	|MERCATOR: (at5g20290 : 213.0) Ribosomal protein S8e family protein; FUNCTIONS IN: structural constituent of ribosome; INVOLVED IN: translation, ribosome biogenesis; LOCATED IN: in 8 components; EXPRESSED IN: 26 plant structures; EXPRESSED DURING: 14 growth stages; CONTAINS InterPro DOMAIN/s: Ribosomal protein S8e (InterPro:IPR001047), Ribosomal protein S8e, conserved site (InterPro:IPR018283), R…	9.18074	-0.573501	0.000445252	0.0433439
376827	29.2.1.2.1.18	protein.synthesis.ribosomal protein.eukaryotic.40S subunit.S18	|MERCATOR: (at4g09800 : 142.0) encodes a ribosomal protein S18C, a constituent of the small subunit of the ribosomal complex; S18 ribosomal protein (RPS18C); FUNCTIONS IN: structural constituent of ribosome, RNA binding, nucleic acid binding; INVOLVED IN: translation; LOCATED IN: cytosolic small ribosomal subunit, small ribosomal subunit, nucleolus, cell wall, vacuole; EXPRESSED IN: 23 plant stru…	8.22267	-1.26146	0.000216805	0.0324925
44150	29.2.2.1	protein.synthesis.ribosome biogenesis.export from nucleus	|MERCATOR: (loc_os09g39910.3 : 86.7) no description available & (at5g60790 : 78.2) member of GCN subfamily; GENERAL CONTROL NON-REPRESSIBLE 1 (GCN1); FUNCTIONS IN: transporter activity; LOCATED IN: plasma membrane; EXPRESSED IN: 24 plant structures; EXPRESSED DURING: 15 growth stages; CONTAINS InterPro DOMAIN/s: ATPase, AAA+ type, core (InterPro:IPR003593), ABC transporter-like (InterPro:IPR00343…	-8.26603	-0.0441451	0.000414572	0.042856
36138	29.3.3	protein.targeting.chloroplast	|MERCATOR: (original description: no original description)||TAGI: TC441617;;Evalue=1E-132;%ident=96.52|MAPMANSTORE: very weakly similar to (88.6) loc_os06g11020 12006.m05819 protein tic22, putative, expressed||BREAD.WHEAT.TIGR: TA100613_4565; TA100613_4565; Evalue=2E-132; %ident=96.52|	-8.32979	0.0729866	0.000234749	0.0331534
51750	29.3.4.3	protein.targeting.secretory pathway.vacuole	|MERCATOR: (loc_os06g01610.1 : 80.5) no description available & (o24325|vpe1_phavu : 78.2) Vacuolar-processing enzyme precursor (EC 3.4.22.-) (VPE) (Legumain-like proteinase) (LLP) - Phaseolus vulgaris (Kidney bean) (French bean) & (at4g32940 : 77.0) Encodes a vacuolar processing enzyme belonging to a novel group of cysteine proteinases that is expressed in vegetative organs and is upregulated in…	2.69617	1.42197	0.000361402	0.040147
34699	29.3.4.99	protein.targeting.secretory pathway.unspecified	|MERCATOR: (at5g14670 : 157.0) A member of ARF GTPase family. Arabidopsis has 21 members of this family, known to be essential for vesicle coating and uncoating and functions in GTP-binding. Gene encoding ADP-ribosylation factor and similar to ADP-ribosylation factor DcARF1 (GI:965483) (Daucus carota), other ARFs and ARF-like proteins. The gene is shown to play a role in cell division, cell expan…	-4.37711	1.54463	3.64316e-05	0.0147977
47324	29.3.4.99	protein.targeting.secretory pathway.unspecified	|MERCATOR: (original description: no original description)||TAGI: CA727504;;Evalue=6E-88;%ident=94.71|MAPMANSTORE: 0||DURUM.WHEAT.TIGR: AJ717190; AJ717190; Evalue=1E-75; %ident=100||BREAD.WHEAT.TIGR: CA727504; CA727504; Evalue=8E-88; %ident=94.71||BRACHYPODIUM GENOME: Bradi3g56617.5 ; highly similar to ( 516) AT2G21520 | Symbols: | transporter | chr2:9215956-9218953 FORWARDhighly similar to ( 967…	-6.63745	0.316545	0.000178777	0.0298105
53493	29.4.1.55	protein.postranslational modification.kinase.receptor like cytoplasmatic kinase V	|MERCATOR: (loc_os04g30040.2 : 119.0) no description available & (at1g67720 : 86.3) Leucine-rich repeat protein kinase family protein; FUNCTIONS IN: protein kinase activity, kinase activity; INVOLVED IN: protein amino acid phosphorylation; LOCATED IN: endomembrane system; EXPRESSED IN: 21 plant structures; EXPRESSED DURING: 13 growth stages; CONTAINS InterPro DOMAIN/s: Protein kinase, ATP binding…	-5.74523	-0.444668	9.13786e-05	0.0237271
50685	29.4.1.56	protein.postranslational modification.kinase.receptor like cytoplasmatic kinase VI	|MERCATOR: (loc_os11g44440.1 : 123.0) no description available & (at1g30570 : 85.1) Encodes HERCULES2 (HERK2), a receptor kinase regulated by Brassinosteroids and required for cell elongation during vegetative growth.; hercules receptor kinase 2 (HERK2); FUNCTIONS IN: kinase activity; INVOLVED IN: response to brassinosteroid stimulus, unidimensional cell growth; LOCATED IN: plasma membrane; EXPRE…	-4.77096	0.61831	0.000131678	0.0261259
1118	29.4.1.57	protein.postranslational modification.kinase.receptor like cytoplasmatic kinase VII	|MERCATOR: (original description: no original description)||BRACHYPODIUM GENOME: Bradi4g10610.1 ; moderately similar to ( 249) AT3G55950 | Symbols: CCR3, ATCRR3 | CCR3 (ARABIDOPSIS THALIANA CRINKLY4 RELATED 3); kinase | chr3:20753903-20756347 REVERSEmoderately similar to ( 209) CRI4_MAIZE Putative receptor protein kinase CRINKLY4 precursor (EC 2.7.11.1) - Zea mays (Maize)moderately similar to ( 4…	-9.1965	1.01096	7.50111e-05	0.02235
30128	29.4.1.57	protein.postranslational modification.kinase.receptor like cytoplasmatic kinase VII	|MERCATOR: (loc_os03g16740.2 : 102.0) no description available & (at5g02290 : 79.0) Encodes a candidate protein kinase NAK that is similar to the oncogenes met and abl.; NAK; FUNCTIONS IN: protein serine/threonine kinase activity, protein kinase activity, kinase activity, ATP binding; INVOLVED IN: protein amino acid phosphorylation; LOCATED IN: plasma membrane; EXPRESSED IN: 23 plant structures; …	3.98156	-0.625765	0.000302152	0.037127
32270	29.4.1.57	protein.postranslational modification.kinase.receptor like cytoplasmatic kinase VII	|MERCATOR: (original description: no original description)||TAGI: TC394619;similar to UniRef100_Q0JEA1 Cluster: Os04g0307500 protein; n=1; Oryza sativa Japonica Group;Rep: Os04g0307500 protein - Oryza sativa subsp. japonica (Rice), partial (55%);Evalue=0;%ident=99.54|MAPMANSTORE: moderately similar to ( 314) AT1G79670 ; Symbols: RFO1, WAKL22 ; RFO1 (RESISTANCE TO FUSARIUM OXYSPORUM 1); kinase ; c…	-9.05315	0.795592	9.61676e-06	0.00864202
49953	29.4.1.57	protein.postranslational modification.kinase.receptor like cytoplasmatic kinase VII	|MERCATOR: (loc_os10g22484.3 : 386.0) no description available & (at1g69790 : 176.0) Protein kinase superfamily protein; FUNCTIONS IN: protein serine/threonine kinase activity, protein kinase activity, kinase activity, ATP binding; INVOLVED IN: protein amino acid phosphorylation; LOCATED IN: chloroplast; EXPRESSED IN: 13 plant structures; EXPRESSED DURING: 6 growth stages; CONTAINS InterPro DOMAI…	-10.703	3.10311	6.15406e-05	0.0205526
39383	29.4	protein.postranslational modification	|MERCATOR: (loc_os10g28610.1 : 70.9) no description available & (gnl|cdd|36433 : 52.7) no description available & (at3g22790 : 48.5) Kinase interacting (KIP1-like) family protein; FUNCTIONS IN: molecular_function unknown; INVOLVED IN: biological_process unknown; LOCATED IN: plasma membrane; EXPRESSED IN: 20 plant structures; EXPRESSED DURING: 13 growth stages; CONTAINS InterPro DOMAIN/s: KIP1-lik…	-9.03816	-0.94699	0.000476766	0.0447082
42245	29.4	protein.postranslational modification	|MERCATOR: (loc_os05g51560.2 : 74.3) no description available & (at2g19470 : 70.1) casein kinase I-like 5 (ckl5); FUNCTIONS IN: protein serine/threonine kinase activity, protein kinase activity, kinase activity, ATP binding; INVOLVED IN: protein amino acid phosphorylation; LOCATED IN: cytoplasm; EXPRESSED IN: 24 plant structures; EXPRESSED DURING: 13 growth stages; CONTAINS InterPro DOMAIN/s: Pro…	2.34756	0.148045	0.000295126	0.0368568
49384	29.4	protein.postranslational modification	|MERCATOR: (loc_os12g41530.1 : 111.0) no description available & (at5g10530 : 91.3) Concanavalin A-like lectin protein kinase family protein; FUNCTIONS IN: kinase activity; INVOLVED IN: protein amino acid phosphorylation; LOCATED IN: endomembrane system; EXPRESSED IN: root; CONTAINS InterPro DOMAIN/s: Legume lectin, beta chain (InterPro:IPR001220), Protein kinase, ATP binding site (InterPro:IPR01…	-5.41201	-1.03088	0.000413536	0.042856
58421	29.4	protein.postranslational modification	|MERCATOR: (loc_os01g26390.1 : 90.5) no description available & (at4g00970 : 58.5) Encodes a cysteine-rich receptor-like protein kinase.; cysteine-rich RLK (RECEPTOR-like protein kinase) 41 (CRK41); FUNCTIONS IN: protein serine/threonine kinase activity, protein kinase activity, ATP binding; INVOLVED IN: protein amino acid phosphorylation; LOCATED IN: endomembrane system; EXPRESSED IN: 12 plant s…	-2.27511	2.35772	0.000514232	0.0455985
5272	29.5.1	protein.degradation.subtilases	|MERCATOR: (loc_os03g02750.1 : 140.0) no description available & (at5g51750 : 87.8) subtilase 1.3 (SBT1.3); FUNCTIONS IN: identical protein binding, serine-type endopeptidase activity; INVOLVED IN: proteolysis, negative regulation of catalytic activity; LOCATED IN: apoplast; EXPRESSED IN: 26 plant structures; EXPRESSED DURING: 13 growth stages; CONTAINS InterPro DOMAIN/s: Protease-associated PA (…	6.23932	-2.43468	0.000448294	0.0433439
43237	29.5.3	protein.degradation.cysteine protease	|MERCATOR: (at1g47128 : 137.0) cysteine proteinase precursor-like protein/ dehydration stress-responsive gene (RD21); responsive to dehydration 21 (RD21); FUNCTIONS IN: cysteine-type endopeptidase activity, cysteine-type peptidase activity; INVOLVED IN: response to water deprivation; LOCATED IN: apoplast, chloroplast, vacuole; EXPRESSED IN: 23 plant structures; EXPRESSED DURING: 13 growth stages;…	-9.91761	-0.115342	0.000172859	0.0294607
46158	29.5.3	protein.degradation.cysteine protease	|MERCATOR: (at1g09850 : 96.3) Arabidopsis thaliana papain-like cysteine peptidase; xylem bark cysteine peptidase 3 (XBCP3); FUNCTIONS IN: cysteine-type endopeptidase activity, cysteine-type peptidase activity; INVOLVED IN: proteolysis; LOCATED IN: vacuole; EXPRESSED IN: 24 plant structures; EXPRESSED DURING: 15 growth stages; CONTAINS InterPro DOMAIN/s: Peptidase C1A, papain (InterPro:IPR013128),…	-10.1884	0.139319	0.000127081	0.0257943
54176	29.5.3	protein.degradation.cysteine protease	|MERCATOR: (original description: no original description)||TAGI: BE412342;similar to UniRef100_Q17ZJ0 Cluster: UPF0078 membrane protein Hac_0075; n=1; Helicobacter acinonychis str. Sheeba;Rep: UPF0078 membrane protein Hac_0075 - Helicobacter acinonychis (strain Sheeba), partial (7%);Evalue=0;%ident=99.09|MAPMANSTORE: similar to UniRef100_Q17ZJ0 Cluster: UPF0078 membrane protein Hac_0075; n=1; He…	-10.0224	1.73802	7.80709e-05	0.0229296
67978	29.5.3	protein.degradation.cysteine protease	|MERCATOR: (original description: no original description)||TAGI: TC451423;;Evalue=0;%ident=98.75|MAPMANSTORE: 0||BREAD.WHEAT.TIGR: CJ557516; CJ557516; Evalue=7E-175; %ident=95.73||BRACHYPODIUM GENOME: Bradi2g42926.1 ; very weakly similar to (96.7) loc_os02g06830 12002.m06030 protein expressed protein no original description||RICE GENOME: Loc_Os04g30860.1 ; 12004.m08190 protein ulp1 protease fami…	-3.45474	2.53608	8.54297e-05	0.0236979
70971	29.5.3	protein.degradation.cysteine protease	|MERCATOR: (loc_os08g40300.1 : 216.0) no description available & (gnl|cdd|82074 : 56.4) no description available & (gnl|cdd|36433 : 49.6) no description available & (at4g00690 : 47.4) UB-like protease 1B (ULP1B); FUNCTIONS IN: cysteine-type peptidase activity; INVOLVED IN: proteolysis; LOCATED IN: chloroplast; EXPRESSED IN: sperm cell; CONTAINS InterPro DOMAIN/s: Peptidase C48, SUMO/Sentrin/Ubl1 …	-8.17059	4.56583	5.99557e-05	0.0201669
196466	29.5.3	protein.degradation.cysteine protease	|MERCATOR: (o65039|cysep_ricco : 67.0) Vignain precursor (EC 3.4.22.-) (Cysteine endopeptidase) - Ricinus communis (Castor bean) & (at5g50260 : 65.5) Cysteine proteinases superfamily protein; FUNCTIONS IN: cysteine-type endopeptidase activity, cysteine-type peptidase activity; INVOLVED IN: proteolysis; LOCATED IN: endomembrane system; EXPRESSED IN: 8 plant structures; EXPRESSED DURING: 4 anthesis…	-9.20159	-0.798403	0.000380162	0.0412104
37542	29.5.5	protein.degradation.serine protease	|MERCATOR: (loc_os02g42310.1 : 75.1) no description available & (at5g23210 : 66.2) serine carboxypeptidase-like 34 (SCPL34); FUNCTIONS IN: serine-type carboxypeptidase activity; INVOLVED IN: proteolysis; LOCATED IN: plant-type cell wall; EXPRESSED IN: 22 plant structures; EXPRESSED DURING: 13 growth stages; CONTAINS InterPro DOMAIN/s: Peptidase S10, serine carboxypeptidase (InterPro:IPR001563), P…	8.35228	-1.26825	0.000352437	0.0401
38961	29.5.5	protein.degradation.serine protease	|MERCATOR: (loc_os02g35630.1 : 182.0) no description available & (at1g33360 : 74.7) Encodes ClpX3, a subunit of the Clp protease complex.; ATP-dependent Clp protease; FUNCTIONS IN: unfolded protein binding, nucleoside-triphosphatase activity, ATPase activity, nucleotide binding, ATP binding; INVOLVED IN: protein folding; EXPRESSED IN: 23 plant structures; EXPRESSED DURING: 10 growth stages; CONTA…	2.61264	2.76327	0.000321688	0.038506
29308	29.5.11.1	protein.degradation.ubiquitin.ubiquitin	|MERCATOR: (original description: no original description)||TAGI: TC371823;homologue to UniRef100_Q9SNZ1 Cluster: Ubiquitin; n=1; Hevea brasiliensis;Rep: Ubiquitin - Hevea brasiliensis (Para rubber tree), partial (54%);Evalue=4E-120;%ident=100|MAPMANSTORE: moderately similar to ( 277) AT5G03240 ; Symbols: UBQ3 ; UBQ3 (POLYUBIQUITIN 3); protein binding ; chr5:771976-772896 REVERSEweakly similar to…	-6.24781	0.493418	0.000121146	0.0254149
76894	29.5.11.1	protein.degradation.ubiquitin.ubiquitin	|MERCATOR: (original description: no original description)||DURUM.WHEAT.TIGR: AJ611186; Ubiquitin-like protein SMT3 [Oryza sativa (Rice)]; Evalue=5E-75; %ident=98.71||BREAD.WHEAT.TIGR: TA103039_4565; Putative Cytochrome P450 [Oryza sativa (Rice)]; Evalue=2E-110; %ident=87.22||BRACHYPODIUM GENOME: Bradi2g58830.1 ; weakly similar to ( 153) AT5G55160 | Symbols: SUM2, SUMO 2, SUMO2, ATSUMO2 | SUMO2 (…	4.49442	0.706105	5.6521e-05	0.0195579
39868	29.5.11.3	protein.degradation.ubiquitin.E2	|MERCATOR: (loc_os12g44000.2 : 120.0) no description available & (at5g42990 : 112.0) ubiquitin-conjugating enzyme 18 (UBC18); FUNCTIONS IN: ubiquitin-protein ligase activity, small conjugating protein ligase activity; INVOLVED IN: ubiquitin-dependent protein catabolic process; EXPRESSED IN: 22 plant structures; EXPRESSED DURING: 13 growth stages; CONTAINS InterPro DOMAIN/s: Ubiquitin-conjugating …	3.40859	0.511913	0.000104965	0.0241662
57636	29.5.11.3	protein.degradation.ubiquitin.E2	|MERCATOR: (loc_os01g13280.1 : 217.0) no description available & (at3g15355 : 176.0) ubiquitin-conjugating enzyme 25 (UBC25); FUNCTIONS IN: small conjugating protein ligase activity; INVOLVED IN: regulation of protein metabolic process, post-translational protein modification; LOCATED IN: cellular_component unknown; EXPRESSED IN: 21 plant structures; EXPRESSED DURING: 13 growth stages; CONTAINS I…	-2.73356	1.49827	0.000222566	0.032925
44389	29.5.11.4.2	protein.degradation.ubiquitin.E3.RING	|MERCATOR: (loc_os03g16480.1 : 88.6) no description available & (at2g39720 : 52.0) Encodes a putative RING-H2 finger protein RHC2a.; RING-H2 finger C2A (RHC2A); FUNCTIONS IN: zinc ion binding; EXPRESSED IN: 24 plant structures; EXPRESSED DURING: 15 growth stages; CONTAINS InterPro DOMAIN/s: Zinc finger, RING-type (InterPro:IPR001841), Zinc finger, C3HC4 RING-type (InterPro:IPR018957), Protein of …	5.44054	-1.23644	2.46769e-05	0.0132658
48132	29.5.11.4.2	protein.degradation.ubiquitin.E3.RING	|MERCATOR: (original description: no original description)||TAGI: TC388123;similar to UniRef100_O49869 Cluster: Ring finger protein; n=1; Hordeum vulgare;Rep: Ring finger protein - Hordeum vulgare (Barley), partial (39%);Evalue=6E-135;%ident=97.19|MAPMANSTORE: weakly similar to ( 117) loc_os10g39450 12010.m06715 protein ring finger protein, putative, expressed similar to UniRef100_O49869 Cluster:…	4.18078	-0.617932	0.000548031	0.0476826
10437	29.5.11.4.3.2	protein.degradation.ubiquitin.E3.SCF.FBOX	|MERCATOR: (original description: no original description)||TAGI: TC403557;;Evalue=2E-118;%ident=99.57|MAPMANSTORE: moderately similar to ( 301) loc_os05g16110 12005.m06019 protein hypothetical protein||BREAD.WHEAT.TIGR: TA94561_4565; TA94561_4565; Evalue=3E-118; %ident=99.57||BRACHYPODIUM GENOME: Bradi5g23520.1 ; moderately similar to ( 291) loc_os05g16240 12005.m06031 protein expressed protein …	4.57296	-1.86021	0.000100968	0.0241662
32108	29.5.11.4.3.2	protein.degradation.ubiquitin.E3.SCF.FBOX	|MERCATOR: (loc_os01g48370.1 : 76.3) no description available & (gnl|cdd|38301 : 56.2) no description available & (gnl|cdd|70912 : 49.7) no description available & (at1g53320 : 42.7) Member of TLP family; tubby like protein 7 (TLP7); CONTAINS InterPro DOMAIN/s: Tubby, C-terminal, conserved site (InterPro:IPR018066), Tubby, C-terminal (InterPro:IPR000007); BEST Arabidopsis thaliana protein match i…	3.07053	-0.699472	1.12956e-05	0.00919051
38754	29.5.11.4.3.2	protein.degradation.ubiquitin.E3.SCF.FBOX	|MERCATOR: (loc_os02g56760.1 : 77.4) no description available & (at2g02250 : 63.2) phloem protein 2-B2 (PP2-B2); FUNCTIONS IN: carbohydrate binding; INVOLVED IN: N-terminal protein myristoylation; LOCATED IN: cellular_component unknown; EXPRESSED IN: stamen; EXPRESSED DURING: 4 anthesis; CONTAINS InterPro DOMAIN/s: F-box domain, cyclin-like (InterPro:IPR001810), F-box domain, Skp2-like (InterPro:…	-7.61544	-0.625431	0.000402823	0.0423274
48634	29.5.11.4.3.2	protein.degradation.ubiquitin.E3.SCF.FBOX	|MERCATOR: (loc_os07g37400.1 : 153.0) no description available & (at4g21510 : 70.1) F-box family protein; CONTAINS InterPro DOMAIN/s: F-box domain, cyclin-like (InterPro:IPR001810); BEST Arabidopsis thaliana protein match is: F-box family protein (TAIR:AT4G05010.1); Has 30201 Blast hits to 17322 proteins in 780 species: Archae - 12; Bacteria - 1396; Metazoa - 17338; Fungi - 3422; Plants - 5037; V…	-4.46014	0.377493	0.000116818	0.0252807
50001	29.5.11.4.3.2	protein.degradation.ubiquitin.E3.SCF.FBOX	|MERCATOR: (original description: no original description)||TAGI: TC379376;;Evalue=0;%ident=99.71|MAPMANSTORE: very weakly similar to ( 100) loc_os04g47550 12004.m78981 protein expressed protein||BREAD.WHEAT.TIGR: TA93301_4565; TA93301_4565; Evalue=0; %ident=99.71||BRACHYPODIUM GENOME: Bradi5g20260.2 ; moderately similar to ( 241) loc_os03g40370 12003.m09117 protein F-box domain containing protei…	-5.91525	-0.257246	3.06248e-05	0.0140228
50493	29.5.11.4.3.2	protein.degradation.ubiquitin.E3.SCF.FBOX	|MERCATOR: (original description: no original description)||TAGI: TC435671;;Evalue=0;%ident=100|MAPMANSTORE: 0||BREAD.WHEAT.TIGR: TA106425_4565; TA106425_4565; Evalue=0; %ident=100||BRACHYPODIUM GENOME: Bradi1g18330.1 ; moderately similar to ( 290) loc_os08g09750 12008.m05109 protein F-box domain containing protein, expressed no original description||RICE GENOME: Loc_Os06g36220.1 ; 12006.m08159 p…	-7.56255	1.32641	0.000495129	0.0451904
66341	29.5.11.4.3.2	protein.degradation.ubiquitin.E3.SCF.FBOX	|MERCATOR: (loc_os09g21290.1 : 164.0) no description available & (gnl|cdd|38301 : 54.6) no description available & (gnl|cdd|33678 : 46.2) no description available & (at3g25750 : 45.4) CONTAINS InterPro DOMAIN/s: F-box domain, cyclin-like (InterPro:IPR001810), Protein of unknown function DUF295 (InterPro:IPR005174); BEST Arabidopsis thaliana protein match is: F-box family protein with a domain of …	-10.8044	2.46831	6.53574e-06	0.00798686
30795	29.5.11.20	protein.degradation.ubiquitin.proteasom	|MERCATOR: (original description: no original description)||TAGI: TC442276;homologue to UniRef100_P46466 Cluster: 26S protease regulatory subunit 4 homolog; n=3; Oryza sativa;Rep: 26S protease regulatory subunit 4 homolog - Oryza sativa subsp. japonica (Rice), partial (24%);Evalue=2E-103;%ident=99.51|MAPMANSTORE: very weakly similar to (84.7) AT4G29040 ; Symbols: RPT2a ; RPT2a (regulatory particl…	2.61709	0.258181	0.000238037	0.0332528
34878	29.5	protein.degradation	|MERCATOR: (original description: no original description)||TAGI: TC433456;similar to UniRef100_A7P9U1 Cluster: Chromosome chr14 scaffold_9, whole genome shotgun sequence; n=1; Vitis vinifera;Rep: Chromosome chr14 scaffold_9, whole genome shotgun sequence - Vitis vinifera (Grape), partial (59%);Evalue=3E-93;%ident=100|MAPMANSTORE: moderately similar to ( 438) AT3G27110 ; Symbols: ; peptidase M48 …	-9.8369	-0.147128	0.000104152	0.0241662
46407	29.6	protein.folding	|MERCATOR: (loc_os02g07220.1 : 71.6) no description available & (at4g19830 : 63.9) FKBP-like peptidyl-prolyl cis-trans isomerase family protein; FUNCTIONS IN: FK506 binding, peptidyl-prolyl cis-trans isomerase activity; INVOLVED IN: protein folding; LOCATED IN: chloroplast thylakoid lumen; EXPRESSED IN: 22 plant structures; EXPRESSED DURING: 15 growth stages; CONTAINS InterPro DOMAIN/s: Peptidyl-…	-9.14914	-0.846323	0.000410036	0.042856
30394	30.1	signalling.in sugar and nutrient physiology	|MERCATOR: (loc_os06g09120.1 : 105.0) no description available & (at2g29110 : 50.1) member of Putative ligand-gated ion channel subunit family; glutamate receptor 2.8 (GLR2.8); FUNCTIONS IN: intracellular ligand-gated ion channel activity; INVOLVED IN: cellular calcium ion homeostasis, response to light stimulus; LOCATED IN: endomembrane system, membrane; EXPRESSED IN: 7 plant structures; EXPRESS…	-10.0226	-0.0219199	4.51786e-07	0.00214037
31932	30.1	signalling.in sugar and nutrient physiology	|MERCATOR: (loc_os02g54640.1 : 165.0) no description available & (at5g11210 : 104.0) member of Putative ligand-gated ion channel subunit family; glutamate receptor 2.5 (GLR2.5); FUNCTIONS IN: intracellular ligand-gated ion channel activity; INVOLVED IN: cellular calcium ion homeostasis, response to light stimulus; LOCATED IN: integral to membrane, membrane; EXPRESSED IN: stem, stamen; EXPRESSED D…	-3.5754	-0.727959	0.000447589	0.0433439
32117	30.1	signalling.in sugar and nutrient physiology	|MERCATOR: (loc_os06g09090.3 : 105.0) no description available & (at2g29120 : 62.8) member of Putative ligand-gated ion channel subunit family; glutamate receptor 2.7 (GLR2.7); FUNCTIONS IN: intracellular ligand-gated ion channel activity; INVOLVED IN: cellular calcium ion homeostasis, response to light stimulus; LOCATED IN: vacuole; EXPRESSED IN: stem, cotyledon, leaf whorl, leaf, stamen; EXPRES…	-6.85665	-0.620565	2.54617e-05	0.0133085
52816	30.2.2	signalling.receptor kinases.leucine rich repeat II	|MERCATOR: (loc_os02g40200.2 : 135.0) no description available & (at5g20480 : 97.4) Encodes a predicted leucine-rich repeat receptor kinase (LRR-RLK). Functions as the receptor for bacterial PAMP (pathogen associated molecular patterns) EF-Tu.; EF-TU receptor (EFR); FUNCTIONS IN: protein serine/threonine kinase activity, transmembrane receptor protein kinase activity, kinase activity, ATP binding…	-5.87328	4.46756	1.07056e-08	0.000204681
39389	30.2.3	signalling.receptor kinases.leucine rich repeat III	|MERCATOR: (loc_os01g42294.1 : 163.0) no description available & (at2g26730 : 144.0) Leucine-rich repeat protein kinase family protein; FUNCTIONS IN: protein serine/threonine kinase activity, protein kinase activity, ATP binding; INVOLVED IN: transmembrane receptor protein tyrosine kinase signaling pathway, protein amino acid phosphorylation; LOCATED IN: plasma membrane; EXPRESSED IN: 24 plant st…	7.07398	-2.02371	0.000206887	0.0318624
126970	30.2.3	signalling.receptor kinases.leucine rich repeat III	|MERCATOR: (loc_os02g40180.1 : 78.2) no description available & (gnl|cdd|38301 : 52.7) no description available & (at3g47110 : 47.4) Leucine-rich repeat protein kinase family protein; FUNCTIONS IN: protein serine/threonine kinase activity, kinase activity, ATP binding; INVOLVED IN: transmembrane receptor protein tyrosine kinase signaling pathway, protein amino acid phosphorylation; LOCATED IN: en…	-9.45567	1.11956	0.000158789	0.0285229
32667	30.2.4	signalling.receptor kinases.leucine rich repeat IV	|MERCATOR: (loc_os11g10310.1 : 113.0) no description available & (at2g25790 : 96.7) Leucine-rich receptor-like protein kinase family protein; FUNCTIONS IN: protein serine/threonine kinase activity, kinase activity, ATP binding; INVOLVED IN: transmembrane receptor protein tyrosine kinase signaling pathway, protein amino acid phosphorylation; LOCATED IN: plasma membrane; EXPRESSED IN: 23 plant stru…	-11.1796	1.11354	4.1398e-05	0.0160808
35312	30.2.10	signalling.receptor kinases.leucine rich repeat X	|MERCATOR: (loc_os01g66820.1 : 202.0) no description available & (at5g48380 : 166.0) Encodes a BAK1-interacting receptor-like kinase named BIR1. Negatively regulates multiple plant resistance signaling pathways, one of which is the SOBIR1(AT2G31880)-dependent pathway.; BAK1-interacting receptor-like kinase 1 (BIR1); FUNCTIONS IN: protein kinase activity; INVOLVED IN: negative regulation of defens…	-8.56841	0.256813	0.000105764	0.0241662
14014	30.2.11	signalling.receptor kinases.leucine rich repeat XI	|MERCATOR: (original description: no original description)||TAGI: CA743008;weakly similar to UniRef100_Q7XH55 Cluster: Leucine Rich Repeat family protein; n=3; Oryza sativa;Rep: Leucine Rich Repeat family protein - Oryza sativa subsp. japonica (Rice), partial (16%);Evalue=4E-33;%ident=79.1|MAPMANSTORE: weakly similar to ( 137) loc_os10g02990 12010.m03716 protein leucine-rich repeat receptor-like …	-9.04855	0.870183	0.000199104	0.0316302
42020	30.2.11	signalling.receptor kinases.leucine rich repeat XI	|MERCATOR: (original description: no original description)||TAGI: GH721044;weakly similar to UniRef100_Q7XH57 Cluster: Leucine Rich Repeat family protein; n=2; Oryza sativa;Rep: Leucine Rich Repeat family protein - Oryza sativa subsp. japonica (Rice), partial (11%);Evalue=3E-106;%ident=99.07|MAPMANSTORE: weakly similar to ( 173) loc_os10g02970 12010.m03714 protein receptor-like protein kinase pre…	-9.3954	-0.577826	5.5636e-05	0.0194237
46680	30.2.11	signalling.receptor kinases.leucine rich repeat XI	|MERCATOR: (loc_os01g12790.1 : 713.0) no description available & (at4g20140 : 367.0) Encodes GASSHO1 (GSO1), a putative leucine-rich repeat transmembrane-type receptor kinase. GSO1 and a homolog GSO2 (At5g44700) are required for the formation of a normal epidermal surface during embryogenesis.; GASSHO1 (GSO1); FUNCTIONS IN: protein serine/threonine kinase activity, protein kinase activity, ATP bi…	-4.82712	6.41113	7.21137e-06	0.00819226
55673	30.2.11	signalling.receptor kinases.leucine rich repeat XI	|MERCATOR: (loc_os02g40240.2 : 92.4) no description available & (at3g47110 : 60.8) Leucine-rich repeat protein kinase family protein; FUNCTIONS IN: protein serine/threonine kinase activity, kinase activity, ATP binding; INVOLVED IN: transmembrane receptor protein tyrosine kinase signaling pathway, protein amino acid phosphorylation; LOCATED IN: endomembrane system; CONTAINS InterPro DOMAIN/s: Pro…	-4.86337	3.81767	1.08519e-05	0.00904006
29029	30.2.12	signalling.receptor kinases.leucine rich repeat XII	|MERCATOR: (loc_os11g29790.1 : 106.0) no description available & (at3g47570 : 48.9) Leucine-rich repeat protein kinase family protein; FUNCTIONS IN: protein serine/threonine kinase activity, kinase activity, ATP binding; INVOLVED IN: transmembrane receptor protein tyrosine kinase signaling pathway, protein amino acid phosphorylation; LOCATED IN: plasma membrane; EXPRESSED IN: 13 plant structures;…	-9.00903	-0.973243	0.000499422	0.0452857
29090	30.2.12	signalling.receptor kinases.leucine rich repeat XII	|MERCATOR: (loc_os11g10310.1 : 122.0) no description available & (at3g47570 : 78.6) Leucine-rich repeat protein kinase family protein; FUNCTIONS IN: protein serine/threonine kinase activity, kinase activity, ATP binding; INVOLVED IN: transmembrane receptor protein tyrosine kinase signaling pathway, protein amino acid phosphorylation; LOCATED IN: plasma membrane; EXPRESSED IN: 13 plant structures;…	-7.97671	-0.319564	0.000554895	0.0477212
49321	30.2.12	signalling.receptor kinases.leucine rich repeat XII	|MERCATOR: (loc_os11g47210.1 : 140.0) no description available & (at3g47570 : 88.6) Leucine-rich repeat protein kinase family protein; FUNCTIONS IN: protein serine/threonine kinase activity, kinase activity, ATP binding; INVOLVED IN: transmembrane receptor protein tyrosine kinase signaling pathway, protein amino acid phosphorylation; LOCATED IN: plasma membrane; EXPRESSED IN: 13 plant structures;…	-6.58342	2.75806	3.79722e-06	0.00607775
70171	30.2.12	signalling.receptor kinases.leucine rich repeat XII	|MERCATOR: (loc_os06g38340.1 : 389.0) no description available & (at3g47580 : 229.0) Leucine-rich repeat protein kinase family protein; FUNCTIONS IN: protein serine/threonine kinase activity, kinase activity, ATP binding; INVOLVED IN: transmembrane receptor protein tyrosine kinase signaling pathway, protein amino acid phosphorylation; LOCATED IN: endomembrane system; CONTAINS InterPro DOMAIN/s: P…	-4.16593	4.26283	2.27159e-07	0.0013677
158	30.2.15	signalling.receptor kinases.thaumatin like	|MERCATOR: (loc_os01g02810.1 : 117.0) no description available & (at1g70250 : 63.2) Encodes a Protease inhibitor/seed storage/LTP family protein; receptor serine/threonine kinase, putative; FUNCTIONS IN: protein serine/threonine kinase activity, transmembrane receptor protein serine/threonine kinase activity, protein kinase activity, ATP binding; INVOLVED IN: protein amino acid phosphorylation; L…	-8.39376	-1.39724	0.000143181	0.0271949
52252	30.2.16	signalling.receptor kinases.Catharanthus roseus-like RLK1	|MERCATOR: (loc_os01g06280.2 : 242.0) no description available & (at3g46290 : 180.0) Encodes HERCULES1 (HERK1), a receptor kinase regulated by Brassinosteroids and required for cell elongation during vegetative growth.; hercules receptor kinase 1 (HERK1); FUNCTIONS IN: protein kinase activity, kinase activity; INVOLVED IN: brassinosteroid mediated signaling pathway, post-embryonic development, re…	6.15909	-0.710823	1.69371e-05	0.0110369
872	30.2.17	signalling.receptor kinases.DUF 26	|MERCATOR: (original description: no original description)||TAGI: BQ579344;similar to UniRef100_Q0JR77 Cluster: Os01g0115700 protein; n=1; Oryza sativa Japonica Group;Rep: Os01g0115700 protein - Oryza, partial (3%);Evalue=5E-24;%ident=80|MAPMANSTORE: weakly similar to ( 101) loc_os01g02580 12001.m06900 protein receptor kinase ORK10, putative similar to UniRef100_Q0JR77 Cluster: Os01g0115700 prote…	-9.07622	-0.91248	0.000126807	0.0257943
16058	30.2.17	signalling.receptor kinases.DUF 26	|MERCATOR: (original description: no original description)||TAGI: TC408658;similar to UniRef100_Q94FQ9 Cluster: Glycine-rich protein GRP18; n=1; Arabidopsis thaliana;Rep: Glycine-rich protein GRP18 - Arabidopsis thaliana (Mouse-ear cress), partial (7%);Evalue=0;%ident=99.82|MAPMANSTORE: similar to UniRef100_Q94FQ9 Cluster: Glycine-rich protein GRP18; n=1; Arabidopsis thaliana;Rep: Glycine-rich pr…	-4.1953	5.35397	0.000380557	0.0412104
21256	30.2.17	signalling.receptor kinases.DUF 26	|MERCATOR: (original description: no original description)||BRACHYPODIUM GENOME: Bradi1g58930.1 ; weakly similar to ( 148) AT1G11340 | Symbols: | S-locus lectin protein kinase family protein | chr1:3814116-3817420 REVERSEweakly similar to ( 126) PSKR_DAUCA Phytosulfokine receptor precursor (EC 2.7.11.1) (Phytosulfokine LRR receptor kinase) - Daucus carota (Carrot)moderately similar to ( 212) loc_…	-10.1128	0.0663812	0.000128173	0.0257943
22443	30.2.17	signalling.receptor kinases.DUF 26	|MERCATOR: (original description: no original description)||TAGI: TC372293;weakly similar to UniRef100_Q2R1E4 Cluster: Protein kinase domain containing protein, expressed; n=1; Oryza sativa Japonica Group;Rep: Protein kinase domain containing protein, expressed - Oryza sativa subsp. japonica (Rice), partial (64%);Evalue=0;%ident=100|MAPMANSTORE: weakly similar to ( 176) AT4G00970 ; Symbols: ; pro…	-9.88589	-0.151502	0.000167737	0.0291886
30751	30.2.17	signalling.receptor kinases.DUF 26	|MERCATOR: (original description: no original description)||TAGI: TC454597;similar to UniRef100_Q2L855 Cluster: Resistance protein; n=1; Hordeum vulgare subsp. vulgare;Rep: Resistance protein - Hordeum vulgare var. distichum (Two-rowed barley), partial (25%);Evalue=0;%ident=100|MAPMANSTORE: weakly similar to ( 112) AT4G38830 ; Symbols: ; protein kinase family protein ; chr4:18122339-18124943 FORW…	-9.22022	-0.763929	0.000122506	0.0255224
31319	30.2.17	signalling.receptor kinases.DUF 26	|MERCATOR: (loc_os02g01840.1 : 715.0) no description available & (p10978|polx_tobac : 233.0) Retrovirus-related Pol polyprotein from transposon TNT 1-94 [Includes: Protease (EC 3.4.23.-); Reverse transcriptase (EC 2.7.7.49); Endonuclease] - Nicotiana tabacum (Common tobacco) & (atmg00300 : 55.1) hypothetical protein; Gag-Pol-related retrotransposon family protein. & (ipr001584 : 54.429134) Integr…	-9.24592	2.41878	0.00018701	0.0305412
32255	30.2.17	signalling.receptor kinases.DUF 26	|MERCATOR: (original description: no original description)||TAGI: CJ554866;weakly similar to UniRef100_Q7XFR9 Cluster: Protein kinase domain containing protein; n=2; Oryza sativa;Rep: Protein kinase domain, partial (15%);Evalue=0;%ident=100|MAPMANSTORE: weakly similar to ( 146) loc_os10g17960 12010.m04880 protein receptor-like protein kinase homolog RK20-1, putative, expressed weakly similar to U…	-10.9577	0.890196	4.39825e-05	0.0167604
32842	30.2.17	signalling.receptor kinases.DUF 26	|MERCATOR: (original description: no original description)||TAGI: GR304732;similar to UniRef100_A0MH64 Cluster: RPG1; n=1; Hordeum vulgare subsp. vulgare;Rep: RPG1 - Hordeum vulgare var. distichum (Two-rowed barley), partial (7%);Evalue=8E-105;%ident=84.13|MAPMANSTORE: similar to UniRef100_A0MH64 Cluster: RPG1; n=1; Hordeum vulgare subsp. vulgare;Rep: RPG1 - Hordeum vulgare var. distichum (Two-ro…	-9.17559	-0.813978	0.000169839	0.0294607
40750	30.2.17	signalling.receptor kinases.DUF 26	|MERCATOR: (original description: no original description)||TAGI: TC424364;similar to UniRef100_Q2L855 Cluster: Resistance protein; n=1; Hordeum vulgare subsp. vulgare;Rep: Resistance protein - Hordeum vulgare var. distichum (Two-rowed barley), partial (18%);Evalue=7E-137;%ident=90.05|MAPMANSTORE: very weakly similar to ( 100) loc_os11g39450 12011.m07792 protein stem rust resistance protein, puta…	-9.99394	-0.0524152	0.000156463	0.028272
42976	30.2.17	signalling.receptor kinases.DUF 26	|MERCATOR: (original description: no original description)||TAGI: TC461307;similar to UniRef100_Q5W239 Cluster: Ser/Thr receptor-like kinase precursor; n=1; Zea mays;Rep: Ser/Thr receptor-like kinase precursor - Zea mays (Maize), partial (24%);Evalue=3E-158;%ident=100|MAPMANSTORE: weakly similar to ( 159) loc_os01g02400 12001.m06882 protein Ser/Thr receptor-like kinase, putative, expressed simila…	-7.96457	-0.331024	0.000559446	0.0477212
53341	30.2.17	signalling.receptor kinases.DUF 26	|MERCATOR: (loc_os04g40450.1 : 211.0) no description available & (at1g21280 : 81.3) CONTAINS InterPro DOMAIN/s: Retrotransposon gag protein (InterPro:IPR005162); Has 707 Blast hits to 705 proteins in 25 species: Archae - 0; Bacteria - 0; Metazoa - 4; Fungi - 0; Plants - 703; Viruses - 0; Other Eukaryotes - 0 (source: NCBI BLink). & (gnl|cdd|38301 : 54.2) no description available & (p10978|polx_to…	-7.38774	0.747641	1.29978e-06	0.0037266
122108	30.2.17	signalling.receptor kinases.DUF 26	|MERCATOR: (original description: no original description)||BRACHYPODIUM GENOME: Bradi2g01180.1 ; moderately similar to ( 309) AT1G66920 | Symbols: | serine/threonine protein kinase, putative | chr1:24965410-24967432 REVERSEweakly similar to ( 186) KPRO_MAIZE Putative receptor protein kinase ZmPK1 precursor (EC 2.7.11.1) - Zea mays (Maize)highly similar to ( 882) loc_os01g02680 12001.m06908 prote…	-9.50961	-0.512895	0.000259357	0.0346564
171094	30.2.17	signalling.receptor kinases.DUF 26	|MERCATOR: (original description: no original description)||BRACHYPODIUM GENOME: Bradi2g01180.1 ; moderately similar to ( 309) AT1G66920 | Symbols: | serine/threonine protein kinase, putative | chr1:24965410-24967432 REVERSEweakly similar to ( 186) KPRO_MAIZE Putative receptor protein kinase ZmPK1 precursor (EC 2.7.11.1) - Zea mays (Maize)highly similar to ( 882) loc_os01g02680 12001.m06908 prote…	-8.99522	-0.96498	0.000355728	0.0401
218232	30.2.17	signalling.receptor kinases.DUF 26	|MERCATOR: (original description: no original description)||BREAD.WHEAT.TIGR: BQ171288; BQ171288; Evalue=8E-51; %ident=100||BRACHYPODIUM GENOME: Bradi5g01637.1 ; weakly similar to ( 135) AT4G21230 | Symbols: | protein kinase family protein | chr4:11319244-11321679 REVERSEweakly similar to ( 114) RPK1_IPONI Receptor-like protein kinase precursor (EC 2.7.11.1) - Ipomoea nil (Japanese morning glory)…	-9.16683	-0.83018	0.000398501	0.0423274
61548	30.2.19	signalling.receptor kinases.legume-lectin	|MERCATOR: (loc_os07g03890.1 : 529.0) no description available & (at2g37710 : 424.0) Induced in response to Salicylic acid.; receptor lectin kinase (RLK); FUNCTIONS IN: kinase activity; INVOLVED IN: response to salicylic acid stimulus; LOCATED IN: plasma membrane; EXPRESSED IN: 23 plant structures; EXPRESSED DURING: 13 growth stages; CONTAINS InterPro DOMAIN/s: Legume lectin, beta chain (InterPro…	-3.06667	2.16395	0.000122392	0.0255224
20434	30.2.20	signalling.receptor kinases.wheat LRK10 like	|MERCATOR: (loc_os01g02780.1 : 286.0) no description available & (gnl|cdd|38301 : 48.1) no description available & (at1g18390 : 44.7) Protein kinase superfamily protein; FUNCTIONS IN: protein serine/threonine kinase activity, protein kinase activity, kinase activity, ATP binding; INVOLVED IN: protein amino acid phosphorylation; EXPRESSED IN: 22 plant structures; EXPRESSED DURING: 13 growth stages…	-8.77881	1.70091	9.14262e-05	0.0237271
56171	30.2.20	signalling.receptor kinases.wheat LRK10 like	|MERCATOR: (loc_os01g02570.1 : 161.0) no description available & (at1g18390 : 43.5) Protein kinase superfamily protein; FUNCTIONS IN: protein serine/threonine kinase activity, protein kinase activity, kinase activity, ATP binding; INVOLVED IN: protein amino acid phosphorylation; EXPRESSED IN: 22 plant structures; EXPRESSED DURING: 13 growth stages; CONTAINS InterPro DOMAIN/s: Protein kinase, ATP …	-11.1731	1.10329	6.56802e-05	0.0205526
31033	30.2.25	signalling.receptor kinases.wall associated kinase	|MERCATOR: (loc_os10g09700.1 : 144.0) no description available & (at1g21210 : 82.4) cell wall-associated ser/thr kinase involved in cell elongation and lateral root development; wall associated kinase 4 (WAK4); FUNCTIONS IN: protein serine/threonine kinase activity, protein kinase activity, ATP binding, calcium ion binding; INVOLVED IN: protein amino acid phosphorylation, unidimensional cell grow…	-9.8292	-0.204639	0.000104168	0.0241662
33037	30.2.25	signalling.receptor kinases.wall associated kinase	|MERCATOR: (loc_os02g42150.2 : 130.0) no description available & (at1g16130 : 75.1) wall-associated kinase like; wall associated kinase-like 2 (WAKL2); FUNCTIONS IN: kinase activity; INVOLVED IN: protein amino acid phosphorylation; LOCATED IN: integral to membrane; EXPRESSED IN: stem, cotyledon, leaf whorl, leaf; EXPRESSED DURING: LP.06 six leaves visible, LP.04 four leaves visible, LP.10 ten lea…	-9.2945	-0.681548	9.8887e-05	0.0241662
34981	30.2.25	signalling.receptor kinases.wall associated kinase	|MERCATOR: (loc_os09g38910.1 : 291.0) no description available & (at1g21240 : 204.0) encodes a wall-associated kinase; wall associated kinase 3 (WAK3); FUNCTIONS IN: protein serine/threonine kinase activity, kinase activity; INVOLVED IN: protein amino acid phosphorylation; LOCATED IN: plasma membrane; EXPRESSED IN: 9 plant structures; EXPRESSED DURING: 9 growth stages; CONTAINS InterPro DOMAIN/s:…	-4.78747	0.0946818	0.000342444	0.0397145
38339	30.2.25	signalling.receptor kinases.wall associated kinase	|MERCATOR: (loc_os02g42150.2 : 262.0) no description available & (at1g21230 : 109.0) encodes a wall-associated kinase; wall associated kinase 5 (WAK5); FUNCTIONS IN: protein serine/threonine kinase activity, kinase activity; INVOLVED IN: protein amino acid phosphorylation; LOCATED IN: plasma membrane; CONTAINS InterPro DOMAIN/s: EGF-like calcium-binding (InterPro:IPR001881), EGF-like, type 3 (Int…	-8.00608	0.539501	0.000354651	0.0401
40163	30.2.25	signalling.receptor kinases.wall associated kinase	|MERCATOR: (loc_os02g42150.1 : 149.0) no description available & (at1g21270 : 70.1) cytoplasmic serine/threonine protein kinase induced by salicylic acid. mutant plants exhibit a loss of cell expansion and dependence on sugars and salts for seedling growth, affecting the expression and activity of vacuolar invertase.; wall-associated kinase 2 (WAK2); FUNCTIONS IN: protein serine/threonine kinase …	-10.2099	0.160825	0.000128457	0.0257943
41567	30.2.25	signalling.receptor kinases.wall associated kinase	|MERCATOR: (loc_os02g42150.2 : 132.0) no description available & (at1g21250 : 52.4) cell wall-associated kinase, may function as a signaling receptor of extracellular matrix component such as oligogalacturonides.; cell wall-associated kinase (WAK1); FUNCTIONS IN: kinase activity; INVOLVED IN: cell surface receptor linked signaling pathway, response to virus, defense response to fungus, response t…	-4.39482	2.88902	2.76442e-05	0.0135369
49473	30.2.25	signalling.receptor kinases.wall associated kinase	|MERCATOR: (loc_os09g29600.1 : 117.0) no description available & (at1g21270 : 50.4) cytoplasmic serine/threonine protein kinase induced by salicylic acid. mutant plants exhibit a loss of cell expansion and dependence on sugars and salts for seedling growth, affecting the expression and activity of vacuolar invertase.; wall-associated kinase 2 (WAK2); FUNCTIONS IN: protein serine/threonine kinase …	-7.00118	0.647964	8.56211e-05	0.0236979
56902	30.2.25	signalling.receptor kinases.wall associated kinase	|MERCATOR: (loc_os04g21790.1 : 383.0) no description available & (at1g21230 : 149.0) encodes a wall-associated kinase; wall associated kinase 5 (WAK5); FUNCTIONS IN: protein serine/threonine kinase activity, kinase activity; INVOLVED IN: protein amino acid phosphorylation; LOCATED IN: plasma membrane; CONTAINS InterPro DOMAIN/s: EGF-like calcium-binding (InterPro:IPR001881), EGF-like, type 3 (Int…	-10.0642	2.61466	8.06188e-07	0.00285528
229794	30.2.25	signalling.receptor kinases.wall associated kinase	|MERCATOR: (loc_os04g24220.1 : 146.0) no description available & (at1g21270 : 47.8) cytoplasmic serine/threonine protein kinase induced by salicylic acid. mutant plants exhibit a loss of cell expansion and dependence on sugars and salts for seedling growth, affecting the expression and activity of vacuolar invertase.; wall-associated kinase 2 (WAK2); FUNCTIONS IN: protein serine/threonine kinase …	-9.3406	-0.670375	0.000315353	0.0381267
345476	30.4.1	signalling.phosphinositides.phosphatidylinositol-4-phosphate 5-kinase	|MERCATOR: (original description: no original description)||BREAD.WHEAT.TIGR: CD873623; CD873623; Evalue=0; %ident=99.25||BRACHYPODIUM GENOME: Bradi1g11530.1 ; highly similar to ( 822) AT1G10900 | Symbols: | phosphatidylinositol-4-phosphate 5-kinase family protein | chr1:3632396-3636416 REVERSEnearly identical (1353) PI5K1_ORYSA Phosphatidylinositol-4-phosphate 5-kinase 1 precursor (EC 2.7.1.68) …	-9.1756	-0.822173	0.000394778	0.0422214
43903	30.11.1	signalling.light.COP9 signalosome	|MERCATOR: (loc_os08g04590.1 : 147.0) no description available & (gnl|cdd|36433 : 59.3) no description available & (at5g41790 : 40.0) encodes a protein that physically interacts specifically with the putative coiled-coil region of COP1 in vitro. In hypocotyl and cotyledon protoplasts, it is associated to the cytoskeleton, but not in the root. expression is not regulated by light.; COP1-interactiv…	-8.88709	2.05956	0.00017293	0.0294607
7903	30.11	signalling.light	|MERCATOR: (original description: no original description)||TAGI: BQ239599;homologue to UniRef100_Q41645 Cluster: Extensin; n=1; Volvox carteri;Rep: Extensin - Volvox carteri, partial (5%);Evalue=0;%ident=99.22|MAPMANSTORE: homologue to UniRef100_Q41645 Cluster: Extensin; n=1; Volvox carteri;Rep: Extensin - Volvox carteri, partial (5%)||BRACHYPODIUM GENOME: Bradi2g56840.1 ; very weakly similar to…	-9.52056	-0.487256	0.000117548	0.0252807
14023	30.11	signalling.light	|MERCATOR: (original description: no original description)||TAGI: GR304450;;Evalue=0;%ident=100|MAPMANSTORE: 0||BREAD.WHEAT.TIGR: CD869781; CD869781; Evalue=0; %ident=97.51||BRACHYPODIUM GENOME: Bradi1g29030.1 ; weakly similar to ( 123) loc_os05g37540 12005.m07933 protein transposon protein, putative, unclassified no original description||RICE GENOME: Loc_Os10g24020.2 ; 12010.m065254 protein tran…	-8.9591	-1.00945	0.000492469	0.0451904
33943	30.11	signalling.light	|MERCATOR: (original description: no original description)||TAGI: TC387740;weakly similar to UniRef100_Q93GZ5 Cluster: Non-ribosomal peptide synthetase; n=1; Streptomyces avermitilis;Rep: Non-ribosomal peptide synthetase - Streptomyces avermitilis, partial (3%);Evalue=0;%ident=100|MAPMANSTORE: weakly similar to UniRef100_Q93GZ5 Cluster: Non-ribosomal peptide synthetase; n=1; Streptomyces avermiti…	-9.61649	-0.412271	9.26678e-05	0.0237423
46353	30.11	signalling.light	|MERCATOR: (loc_os06g42420.1 : 179.0) no description available & (at4g38180 : 105.0) FAR1-related sequence 5 (FRS5); FUNCTIONS IN: zinc ion binding; INVOLVED IN: response to red or far red light; LOCATED IN: cellular_component unknown; EXPRESSED IN: 22 plant structures; EXPRESSED DURING: 13 growth stages; CONTAINS InterPro DOMAIN/s: MULE transposase, conserved domain (InterPro:IPR018289), Transcr…	-9.67089	1.3933	6.44407e-05	0.0205526
46721	30.11	signalling.light	|MERCATOR: (original description: no original description)||TAGI: TC398073;;Evalue=0;%ident=98.68|MAPMANSTORE: 0||BRACHYPODIUM GENOME: Bradi2g07910.1 ; weakly similar to ( 145) loc_os02g40950 12002.m09180 protein transposon protein, putative, unclassified no original description||RICE GENOME: Loc_Os07g32110.1 ; 12007.m07477 protein transposon protein, putative, unclassified|	-8.22524	0.0306415	2.84208e-06	0.00551997
47966	30.11	signalling.light	|MERCATOR: (original description: no original description)||TAGI: TC443140;;Evalue=1E-152;%ident=99.66|MAPMANSTORE: very weakly similar to (87.8) loc_os12g03660 12012.m04363 protein transposon protein, putative, unclassified||BREAD.WHEAT.TIGR: TA85119_4565; TA85119_4565; Evalue=2E-152; %ident=99.66|	-8.40652	-1.46282	0.000163812	0.0290087
51367	30.11	signalling.light	|MERCATOR: (original description: no original description)||TAGI: CK217794;similar to UniRef100_P14895 Cluster: High molecular mass early light-inducible protein HV58, chloroplast precursor; n=1; Hordeum vulgare;Rep: High molecular mass early light-inducible protein HV58, chloroplast precursor - Hordeum vulgare (Barley), partial (68%);Evalue=3E-153;%ident=98.07|MAPMANSTORE: weakly similar to ( 14…	4.48591	2.54152	6.12254e-06	0.00798686
51456	30.11	signalling.light	|MERCATOR: (original description: no original description)||TAGI: TC380726;homologue to UniRef100_A6TGI8 Cluster: Porphobilinogen deaminase; n=1; Klebsiella pneumoniae subsp. pneumoniae MGH 78578;Rep: Porphobilinogen deaminase - Klebsiella pneumoniae subsp. pneumoniae (strain ATCC 700721 / MGH78578), partial (5%);Evalue=1E-145;%ident=98.3|MAPMANSTORE: homologue to UniRef100_A6TGI8 Cluster: Porpho…	-9.18431	-0.814208	0.000388046	0.0417521
53935	30.11	signalling.light	|MERCATOR: (original description: no original description)||TAGI: CJ879855;similar to UniRef100_Q672R6 Cluster: Hydroxymethylbutenyl 4-diphosphate synthase; n=1; Zea mays;Rep: Hydroxymethylbutenyl 4-diphosphate synthase - Zea mays (Maize), partial (3%);Evalue=0;%ident=99.18|MAPMANSTORE: similar to UniRef100_Q672R6 Cluster: Hydroxymethylbutenyl 4-diphosphate synthase; n=1; Zea mays;Rep: Hydroxymet…	-4.87564	-1.37531	0.000513821	0.0455985
62715	30.11	signalling.light	|MERCATOR: (original description: no original description)||TAGI: BQ805968;similar to UniRef100_Q4S9Y3 Cluster: Chromosome undetermined SCAF14693, whole genome shotgun sequence; n=1; Tetraodon nigroviridis;Rep: Chromosome undetermined SCAF14693, whole genome shotgun sequence - Tetraodon nigroviridis (Green puffer), partial (36%);Evalue=0;%ident=99.61|MAPMANSTORE: similar to UniRef100_Q4S9Y3 Clust…	-5.34284	1.97684	0.000149411	0.0276796
6574	31.1	cell.organisation	|MERCATOR: (loc_os09g17329.2 : 207.0) no description available & (at4g03500 : 67.0) Ankyrin repeat family protein; CONTAINS InterPro DOMAIN/s: Ankyrin repeat-containing domain (InterPro:IPR020683), Ankyrin repeat (InterPro:IPR002110); BEST Arabidopsis thaliana protein match is: Ankyrin repeat family protein (TAIR:AT4G03460.1); Has 38634 Blast hits to 17459 proteins in 653 species: Archae - 49; Ba…	-5.48713	0.153308	0.000572041	0.0482381
29852	31.1	cell.organisation	|MERCATOR: (loc_os09g03750.1 : 114.0) no description available & (at3g04710 : 63.5) ankyrin repeat family protein; FUNCTIONS IN: binding; INVOLVED IN: biological_process unknown; LOCATED IN: cellular_component unknown; EXPRESSED IN: 22 plant structures; EXPRESSED DURING: 14 growth stages; CONTAINS InterPro DOMAIN/s: Protein of unknown function DUF1685 (InterPro:IPR012881), Tetratricopeptide-like …	-8.47626	-1.31897	0.000557465	0.0477212
37695	31.1	cell.organisation	|MERCATOR: (p20904|act_volca : 307.0) Actin - Volvox carteri & (loc_os12g44350.1 : 305.0) no description available & (at3g12110 : 302.0) Encodes an actin that is expressed predominantly during reproductive development.; actin-11 (ACT11); FUNCTIONS IN: structural constituent of cytoskeleton; INVOLVED IN: response to cyclopentenone, actin cytoskeleton organization; LOCATED IN: mitochondrion, cytosk…	10.8639	0.939471	8.83536e-05	0.0236979
43921	31.1	cell.organisation	|MERCATOR: (p17299|act3_orysa : 184.0) Actin-3 - Oryza sativa (Rice) & (loc_os03g61970.1 : 184.0) no description available & (at5g09810 : 183.0) Member of Actin gene family.Mutants are defective in germination and root growth.; actin 7 (ACT7); FUNCTIONS IN: protein binding, structural constituent of cytoskeleton; INVOLVED IN: in 9 processes; LOCATED IN: mitochondrion, nucleolus, cell wall, cytosk…	9.44228	-0.341582	0.000345047	0.0398444
60553	31.1	cell.organisation	|MERCATOR: (loc_os04g45210.1 : 242.0) no description available & (at3g47430 : 190.0) member of the peroxin11 (PEX11) gene family, located on the peroxisome membrane, controls peroxisome proliferation.; peroxin 11B (PEX11B); CONTAINS InterPro DOMAIN/s: Peroxisomal biogenesis factor 11 (InterPro:IPR008733); BEST Arabidopsis thaliana protein match is: peroxin 11A (TAIR:AT1G47750.1); Has 320 Blast hi…	4.97844	2.07179	2.1794e-05	0.0123792
40079	31.2	cell.division	|MERCATOR: (original description: no original description)||RICE GENOME: Loc_Os12g07900.1 ; 12012.m04777 protein hypothetical protein|	-9.45439	-0.549115	9.50935e-05	0.024026
359279	31.3	cell.cycle	|MERCATOR: (gnl|cdd|38301 : 49.6) no description available & (loc_os12g20324.3 : 42.7) no description available & (at1g47220 : 41.6) Cyclin A3;3 (CYCA3;3); FUNCTIONS IN: cyclin-dependent protein kinase regulator activity; INVOLVED IN: regulation of cell cycle; LOCATED IN: nucleus; EXPRESSED IN: pollen tube; CONTAINS InterPro DOMAIN/s: Cyclin, C-terminal (InterPro:IPR004367), Cyclin (InterPro:IPR0…	6.30266	-2.24609	8.39938e-05	0.0236979
50095	31.4	cell.vesicle transport	|MERCATOR: (gnl|cdd|36139 : 54.2) no description available & (loc_os01g51120.2 : 51.2) no description available & (gnl|cdd|34516 : 45.4) no description available & (at5g39510 : 44.3) Encodes a member of SNARE gene family. Homologous with yeast VTI1 and is involved in vesicle transport. Mutant alleles such as sgr4/zig are defective in the shoots response to gravity resulting in a zigzag growth pat…	5.20111	-0.690579	0.000294688	0.0368568
49347	33.2	development.late embryogenesis abundant	|MERCATOR: (original description: no original description)||TAGI: TC379758;weakly similar to UniRef100_Q0IV15 Cluster: Os11g0120000 protein; n=1; Oryza sativa Japonica Group;Rep: Os11g0120000 protein - Oryza sativa subsp. japonica (Rice), partial (88%);Evalue=3E-178;%ident=100|MAPMANSTORE: very weakly similar to (88.2) AT3G05975 ; Symbols: ; FUNCTIONS IN: molecular_function unknown; INVOLVED IN: …	3.21542	-0.635022	0.000269419	0.0351914
51520	33.4.3	development.organ development.shoot development.shoot development	|MERCATOR: (loc_os05g03410.1 : 204.0) no description available & (gnl|cdd|38301 : 49.2) no description available & (at2g41370 : 41.2) Encodes BOP2, a cytoplasmic and nuclear-localized NPR1 like protein with BTB/POZ domain and ankyrin repeats. Interacts with BOP1 and appears to be genetically redundant with BOP1.bop1/bop2 double mutants have longer leaves, often with leaflets on the petiole, asymm…	-10.0445	3.44708	2.2722e-05	0.0125511
17047	33.99	development.unspecified	|MERCATOR: (loc_os08g31700.1 : 166.0) no description available & (at1g78130 : 140.0) unfertilized embryo sac 2 (UNE2); CONTAINS InterPro DOMAIN/s: Major facilitator superfamily (InterPro:IPR020846), Major facilitator superfamily MFS-1 (InterPro:IPR011701), Major facilitator superfamily, general substrate transporter (InterPro:IPR016196); BEST Arabidopsis thaliana protein match is: Major facilitat…	6.68678	-2.19583	0.000452302	0.0433439
41502	33.99	development.unspecified	|MERCATOR: (original description: no original description)||TAGI: TC405557;;Evalue=0;%ident=99.47|MAPMANSTORE: weakly similar to ( 141) loc_os06g11980 12006.m05915 protein expressed protein||BREAD.WHEAT.TIGR: TA92719_4565; TA92719_4565; Evalue=0; %ident=99.47||BRACHYPODIUM GENOME: Bradi1g45410.1 ; weakly similar to ( 144) loc_os06g11980 12006.m05915 protein expressed protein no original descripti…	2.62407	1.10381	3.2723e-05	0.0141742
48649	33.99	development.unspecified	|MERCATOR: (loc_os01g71970.1 : 113.0) no description available & (at1g50420 : 55.5) Encodes a scarecrow-like protein (SCL3) Putative transcription factors interacting with the gene product of VHA-B1 (vacuolar ATPase subunit B1; as shown through yeast two-hybrid assay).; scarecrow-like 3 (SCL3); CONTAINS InterPro DOMAIN/s: Transcription factor GRAS (InterPro:IPR005202); BEST Arabidopsis thaliana p…	3.57879	-0.737005	0.000473332	0.0445294
237902	33.99	development.unspecified	|MERCATOR: (original description: no original description)||BRACHYPODIUM GENOME: Bradi3g32820.1 ; highly similar to ( 692) AT1G63680 | Symbols: ATMURE, PDE316, MURE | MURE; ATP binding / acid-amino acid ligase/ ligase | chr1:23614461-23617247 FORWARDnearly identical (1105) loc_os10g40130 12010.m06785 protein UDP-N-acetylmuramoylalanyl-D-glutamate--2,6-diaminopimelate ligase, putative, expressedmu…	7.00033	-2.03991	8.42518e-05	0.0236979
69038	34.1	transport.p- and v-ATPases	|MERCATOR: (loc_os12g44150.2 : 810.0) no description available & (q08435|pma1_nicpl : 780.0) Plasma membrane ATPase 1 (EC 3.6.3.6) (Proton pump 1) - Nicotiana plumbaginifolia (Leadwort-leaved tobacco) & (at5g62670 : 774.0) H(+)-ATPase 11 (HA11); FUNCTIONS IN: ATPase activity; INVOLVED IN: cation transport, metabolic process, ATP biosynthetic process; LOCATED IN: plasma membrane, membrane; EXPRESS…	-2.31595	2.95145	8.71129e-06	0.00845964
16406	34.3	transport.amino acids	|MERCATOR: (loc_os03g25840.1 : 241.0) no description available & (at3g13620 : 172.0) Amino acid permease family protein; FUNCTIONS IN: cationic amino acid transmembrane transporter activity; INVOLVED IN: transport, amino acid transport, transmembrane transport; LOCATED IN: membrane; EXPRESSED IN: 23 plant structures; EXPRESSED DURING: 12 growth stages; CONTAINS InterPro DOMAIN/s: Amino acid/polya…	4.43092	-0.963734	1.19874e-05	0.00949673
27201	34.6	transport.sulphate	|MERCATOR: (loc_os04g55800.1 : 124.0) no description available & (at1g23090 : 114.0) Encodes AST91 mRNA for sulfate transporter.; sulfate transporter 91 (AST91); FUNCTIONS IN: sulfate transmembrane transporter activity; INVOLVED IN: sulfate transport, transport, transmembrane transport; LOCATED IN: integral to membrane, membrane; EXPRESSED IN: 22 plant structures; EXPRESSED DURING: 13 growth stag…	5.26233	-1.26247	0.000450953	0.0433439
40211	34.9	transport.metabolite transporters at the mitochondrial membrane	|MERCATOR: (loc_os01g43460.1 : 99.8) no description available & (at4g27970 : 75.1) Encodes a protein with ten predicted transmembrane helices. The SLAH2 protein has similarity to the SLAC1 protein involved in ion homeostasis in guard cells. But, it is not expressed in guard cells and cannot complement a slac1-2 mutant suggesting that it performs a different function. SLAH2:GFP localizes to the pl…	6.42948	-2.17813	0.000176752	0.0297264
48963	34.9	transport.metabolite transporters at the mitochondrial membrane	|MERCATOR: (loc_os08g37600.1 : 73.6) no description available & (at5g64280 : 57.8) dicarboxylate transporter 2.2 (DiT2.2); FUNCTIONS IN: oxoglutarate:malate antiporter activity; INVOLVED IN: malate transport, sodium ion transport, transmembrane transport; LOCATED IN: chloroplast, membrane; EXPRESSED IN: 23 plant structures; EXPRESSED DURING: 13 growth stages; CONTAINS InterPro DOMAIN/s: Sodium/su…	7.47465	-1.94654	0.000537138	0.0469384
50902	34.9	transport.metabolite transporters at the mitochondrial membrane	|MERCATOR: (loc_os03g11510.1 : 84.0) no description available & (at1g74240 : 67.0) Mitochondrial substrate carrier family protein; FUNCTIONS IN: binding; INVOLVED IN: transport, mitochondrial transport, transmembrane transport; LOCATED IN: mitochondrial inner membrane, membrane; EXPRESSED IN: 11 plant structures; EXPRESSED DURING: 6 growth stages; CONTAINS InterPro DOMAIN/s: Mitochondrial carrier…	-7.79869	-0.342113	0.00058389	0.0488218
58652	34.13	transport.peptides and oligopeptides	|MERCATOR: (loc_os05g35594.1 : 249.0) no description available & (at1g22540 : 168.0) Major facilitator superfamily protein; FUNCTIONS IN: transporter activity; INVOLVED IN: oligopeptide transport; LOCATED IN: membrane; EXPRESSED IN: 22 plant structures; EXPRESSED DURING: 13 growth stages; CONTAINS InterPro DOMAIN/s: PTR2 family proton/oligopeptide symporter, conserved site (InterPro:IPR018456), O…	2.58942	0.365769	0.000207445	0.0318624
44889	34.14	transport.unspecified cations	|MERCATOR: (at3g20660 : 75.9) organic cation/carnitine transporter4 (4-Oct); FUNCTIONS IN: carbohydrate transmembrane transporter activity, sugar:hydrogen symporter activity; INVOLVED IN: transport, transmembrane transport; LOCATED IN: chloroplast thylakoid membrane, membrane; EXPRESSED IN: 13 plant structures; EXPRESSED DURING: 6 growth stages; CONTAINS InterPro DOMAIN/s: Sugar transporter, cons…	4.2135	-0.99585	0.000420281	0.0430352
154782	34.15	transport.potassium	|MERCATOR: (original description: no original description)||BRACHYPODIUM GENOME: Bradi1g08380.2 ; moderately similar to ( 257) AT5G55630 | Symbols: KCO1, TPK1 | ATKCO1; calcium-activated potassium channel/ ion channel/ outward rectifier potassium channel | chr5:22531718-22532893 FORWARDmoderately similar to ( 410) loc_os03g54100 12003.m35415 protein calcium-activated outward-rectifying potassium …	3.89355	-1.11614	1.78938e-05	0.0111069
31160	34.16	transport.ABC transporters and multidrug resistance systems	|MERCATOR: (q8gu86|pdr5_orysa : 805.0) Pleiotropic drug resistance protein 5 - Oryza sativa (Rice) & (loc_os07g33780.1 : 805.0) no description available & (at2g36380 : 634.0) pleiotropic drug resistance 6 (PDR6); FUNCTIONS IN: ATPase activity, coupled to transmembrane movement of substances; LOCATED IN: plasma membrane; EXPRESSED IN: 24 plant structures; EXPRESSED DURING: 13 growth stages; CONTAI…	-12.5516	2.48026	2.73946e-05	0.0135369
48962	34.16	transport.ABC transporters and multidrug resistance systems	|MERCATOR: (loc_os05g02890.1 : 104.0) no description available & (at3g55110 : 98.6) ABC-2 type transporter family protein; FUNCTIONS IN: ATPase activity, coupled to transmembrane movement of substances; LOCATED IN: membrane; EXPRESSED IN: 21 plant structures; EXPRESSED DURING: 12 growth stages; CONTAINS InterPro DOMAIN/s: ATPase, AAA+ type, core (InterPro:IPR003593), ABC transporter-like (InterPr…	4.88263	-0.71376	0.000424514	0.0430371
51023	34.16	transport.ABC transporters and multidrug resistance systems	|MERCATOR: (loc_os05g02870.1 : 199.0) no description available & (at2g39350 : 155.0) ABC-2 type transporter family protein; FUNCTIONS IN: ATPase activity, coupled to transmembrane movement of substances; INVOLVED IN: response to nematode; LOCATED IN: plasma membrane; EXPRESSED IN: 15 plant structures; EXPRESSED DURING: 4 anthesis, C globular stage, petal differentiation and expansion stage, E exp…	2.48614	-0.356691	0.000264088	0.0349461
70588	34.16	transport.ABC transporters and multidrug resistance systems	|MERCATOR: (q5w274|pdr3_tobac : 744.0) Pleiotropic drug resistance protein 3 (NtPDR3) - Nicotiana tabacum (Common tobacco) & (loc_os02g32690.1 : 734.0) no description available & (at4g15215 : 707.0) pleiotropic drug resistance 13 (PDR13); FUNCTIONS IN: nucleoside-triphosphatase activity, ATPase activity, nucleotide binding, ATP binding; INVOLVED IN: drug transmembrane transport; LOCATED IN: membr…	-2.20654	6.11996	3.23968e-05	0.0141742
65539	34.19.1	transport.Major Intrinsic Proteins.PIP	|MERCATOR: (q651d5|pip27_orysa : 63.9) Probable aquaporin PIP2.7 (Plasma membrane intrinsic protein 2.7) (OsPIP2.7) - Oryza sativa (Rice) & (loc_os09g36930.1 : 63.9) no description available & (at5g60660 : 61.6) A member of the plasma membrane intrinsic protein subfamily PIP2.When expressed in yeast cells can conduct hydrogen peroxide into those cells.; plasma membrane intrinsic protein 2;4 (PIP2…	2.25615	6.62364	1.99575e-05	0.0116663
22705	34.20	transport.porins	|MERCATOR: (loc_os01g40570.1 : 81.6) no description available & (p46274|vdac1_wheat : 75.5) Outer mitochondrial membrane protein porin (Voltage-dependent anion-selective channel protein) (VDAC) - Triticum aestivum (Wheat) & (at3g01280 : 68.6) Encodes a voltage-dependent anion channel (VDAC: AT3G01280/VDAC1, AT5G67500/VDAC2, AT5G15090/VDAC3, AT5G57490/VDAC4, AT5G15090/VDAC5). VDACs are reported to…	-11.8505	1.78093	4.7969e-05	0.0177188
43596	34.20	transport.porins	|MERCATOR: (gnl|cdd|38301 : 56.2) no description available & (q6k548|vdac1_orysa : 53.9) Outer mitochondrial membrane protein porin (Voltage-dependent anion-selective channel protein) (VDAC) - Oryza sativa (Rice) & (loc_os09g19734.3 : 53.9) no description available & (at5g15090 : 53.5) Encodes a voltage-dependent anion channel (VDAC: AT3G01280/VDAC1, AT5G67500/VDAC2, AT5G15090/VDAC3, AT5G57490/VD…	-9.38843	1.1998	4.66697e-05	0.0173453
51248	34.99	transport.misc	|MERCATOR: (loc_os08g44870.3 : 152.0) no description available & (at4g25640 : 108.0) Encodes a multidrug and toxin efflux family transporter. Involved in flavonoid metabolism, affecting Root growth, seed development and germination, and pollen development, release and viability.; detoxifying efflux carrier 35 (DTX35); FUNCTIONS IN: antiporter activity, drug transmembrane transporter activity; INV…	4.44615	-0.0879725	5.82322e-06	0.00797176
42470	35.1.9	not assigned.no ontology.BTB/POZ domain-containing protein	|MERCATOR: (loc_os02g16000.1 : 63.5) no description available & (at4g01160 : 51.2) BTB/POZ/Kelch-associated protein; CONTAINS InterPro DOMAIN/s: BTB/POZ (InterPro:IPR013069), BTB/Kelch-associated (InterPro:IPR011705), BTB/POZ fold (InterPro:IPR011333), Kelch related (InterPro:IPR013089), BTB/POZ-like (InterPro:IPR000210); BEST Arabidopsis thaliana protein match is: POZ/BTB containin G-protein 1 (…	-9.32667	1.15832	3.53537e-05	0.0146003
61685	35.1.26	not assigned.no ontology.DC1 domain containing protein	|MERCATOR: (loc_os08g31170.1 : 107.0) no description available & (at2g16050 : 102.0) Cysteine/Histidine-rich C1 domain family protein; CONTAINS InterPro DOMAIN/s: DC1 (InterPro:IPR004146); BEST Arabidopsis thaliana protein match is: Cysteine/Histidine-rich C1 domain family protein (TAIR:AT1G20990.1); Has 30201 Blast hits to 17322 proteins in 780 species: Archae - 12; Bacteria - 1396; Metazoa - 17…	-3.21381	3.51434	0.000117196	0.0252807
47375	35.1.27	not assigned.no ontology.tetratricopeptide repeat (TPR)	|MERCATOR: (loc_os07g27180.1 : 191.0) no description available & (at5g17270 : 116.0) Protein prenylyltransferase superfamily protein; FUNCTIONS IN: binding; INVOLVED IN: biological_process unknown; LOCATED IN: cellular_component unknown; EXPRESSED IN: 21 plant structures; EXPRESSED DURING: 10 growth stages; CONTAINS InterPro DOMAIN/s: Tetratricopeptide TPR-1 (InterPro:IPR001440), Tetratricopeptid…	-5.05341	-0.668639	5.7653e-05	0.0197474
39209	35.1.41	not assigned.no ontology.hydroxyproline rich proteins	|MERCATOR: (loc_os03g13560.1 : 166.0) no description available & (at1g14710 : 117.0) hydroxyproline-rich glycoprotein family protein; BEST Arabidopsis thaliana protein match is: oxidoreductase, 2OG-Fe(II) oxygenase family protein (TAIR:AT4G02940.1); Has 6006 Blast hits to 3456 proteins in 374 species: Archae - 2; Bacteria - 410; Metazoa - 1957; Fungi - 511; Plants - 1958; Viruses - 385; Other Euk…	3.0304	-0.0690961	0.000597313	0.0496735
53101	35.1.41	not assigned.no ontology.hydroxyproline rich proteins	|MERCATOR: (loc_os07g48490.4 : 130.0) no description available & (at2g39050 : 60.8) hydroxyproline-rich glycoprotein family protein; CONTAINS InterPro DOMAIN/s: Ricin B-related lectin (InterPro:IPR008997), Ricin B lectin (InterPro:IPR000772); Has 1708 Blast hits to 1449 proteins in 222 species: Archae - 0; Bacteria - 47; Metazoa - 514; Fungi - 386; Plants - 615; Viruses - 5; Other Eukaryotes - 14…	3.172	4.83974	9.29389e-06	0.00864202
47713	35.1	not assigned.no ontology	|MERCATOR: (loc_os02g48980.1 : 150.0) no description available & (at5g56170 : 122.0) LORELEI-LIKE-GPI-ANCHORED PROTEIN 1 (LLG1); BEST Arabidopsis thaliana protein match is: lorelei (TAIR:AT4G26466.1); Has 1807 Blast hits to 1807 proteins in 277 species: Archae - 0; Bacteria - 0; Metazoa - 736; Fungi - 347; Plants - 385; Viruses - 0; Other Eukaryotes - 339 (source: NCBI BLink). & (gnl|cdd|36433 : …	-10.4126	0.353863	0.000108816	0.0243833
48060	35.1	not assigned.no ontology	|MERCATOR: (loc_os01g44960.1 : 154.0) no description available & (at4g36610 : 138.0) alpha/beta-Hydrolases superfamily protein; FUNCTIONS IN: hydrolase activity; INVOLVED IN: biological_process unknown; LOCATED IN: endomembrane system; EXPRESSED IN: 18 plant structures; EXPRESSED DURING: 8 growth stages; CONTAINS InterPro DOMAIN/s: Alpha/beta hydrolase fold-1 (InterPro:IPR000073); BEST Arabidopsi…	-5.69357	-0.884268	0.000528924	0.0466682
48520	35.1	not assigned.no ontology	|MERCATOR: (at1g69840 : 61.6) SPFH/Band 7/PHB domain-containing membrane-associated protein family; INVOLVED IN: biological_process unknown; EXPRESSED IN: 24 plant structures; EXPRESSED DURING: 15 growth stages; CONTAINS InterPro DOMAIN/s: Band 7 protein (InterPro:IPR001107); BEST Arabidopsis thaliana protein match is: SPFH/Band 7/PHB domain-containing membrane-associated protein family (TAIR:AT5…	-10.0234	-0.0239832	5.97938e-05	0.0201669
49934	35.1	not assigned.no ontology	|MERCATOR: (loc_os02g57620.1 : 144.0) no description available & (at1g02260 : 125.0) Divalent ion symporter; FUNCTIONS IN: citrate transmembrane transporter activity, transporter activity; INVOLVED IN: citrate transport, transmembrane transport; LOCATED IN: endomembrane system, integral to membrane; EXPRESSED IN: 24 plant structures; EXPRESSED DURING: 13 growth stages; CONTAINS InterPro DOMAIN/s:…	4.50879	-0.343993	0.00012801	0.0257943
54424	35.1	not assigned.no ontology	|MERCATOR: (loc_os07g44410.1 : 283.0) no description available & (at4g01870 : 237.0) tolB protein-related; FUNCTIONS IN: molecular_function unknown; INVOLVED IN: response to cyclopentenone; LOCATED IN: membrane; EXPRESSED IN: 22 plant structures; EXPRESSED DURING: 13 growth stages; CONTAINS InterPro DOMAIN/s: WD40-like Beta Propeller (InterPro:IPR011659), Peptidase S9B, dipeptidylpeptidase IV N-t…	2.41385	0.965149	0.000518008	0.0458658
59357	35.1	not assigned.no ontology	|MERCATOR: (loc_os07g41810.4 : 255.0) no description available & (at2g31670 : 74.3) Stress responsive alpha-beta barrel domain protein; FUNCTIONS IN: molecular_function unknown; INVOLVED IN: biological_process unknown; LOCATED IN: peroxisome, chloroplast stroma, chloroplast; EXPRESSED IN: 22 plant structures; EXPRESSED DURING: 17 growth stages; CONTAINS InterPro DOMAIN/s: Stress responsive alpha-…	2.39219	1.27654	0.000276116	0.0356752
67722	35.1	not assigned.no ontology	|MERCATOR: (loc_os10g32700.1 : 525.0) no description available & (at5g62740 : 477.0) HYPERSENSITIVE-INDUCED RESPONSE PROTEIN 1 (HIR1); INVOLVED IN: N-terminal protein myristoylation; LOCATED IN: plasma membrane, vacuole, membrane; EXPRESSED IN: 25 plant structures; EXPRESSED DURING: 15 growth stages; CONTAINS InterPro DOMAIN/s: Band 7 protein (InterPro:IPR001107); BEST Arabidopsis thaliana protei…	-3.56289	2.36415	6.38726e-05	0.0205526
69991	35.1	not assigned.no ontology	|MERCATOR: (loc_os01g34870.1 : 436.0) no description available & (at2g32590 : 256.0) LOCATED IN: chloroplast; EXPRESSED IN: 17 plant structures; EXPRESSED DURING: 9 growth stages; CONTAINS InterPro DOMAIN/s: Barren (InterPro:IPR008418); Has 467 Blast hits to 447 proteins in 202 species: Archae - 0; Bacteria - 4; Metazoa - 147; Fungi - 168; Plants - 39; Viruses - 1; Other Eukaryotes - 108 (source:…	-2.67421	2.11217	0.000452413	0.0433439
174493	35.1	not assigned.no ontology	|MERCATOR: (loc_os08g06200.1 : 167.0) no description available & (at4g27585 : 163.0) SPFH/Band 7/PHB domain-containing membrane-associated protein family; FUNCTIONS IN: zinc ion binding; INVOLVED IN: biological_process unknown; LOCATED IN: mitochondrion, membrane; EXPRESSED IN: callus, leaf; CONTAINS InterPro DOMAIN/s: Band 7 protein (InterPro:IPR001107); BEST Arabidopsis thaliana protein match i…	-10.1874	0.126656	1.9453e-07	0.00130139
639	35.2	not assigned.unknown	|MERCATOR: (original description: no original description)||TAGI: TC458836;similar to UniRef100_Q2R4X3 Cluster: Expressed protein; n=2; Oryza sativa Japonica Group;Rep: Expressed protein - Oryza sativa subsp. japonica (Rice), partial (6%);Evalue=0;%ident=98.99|MAPMANSTORE: similar to UniRef100_Q2R4X3 Cluster: Expressed protein; n=2; Oryza sativa Japonica Group;Rep: Expressed protein - Oryza sativ…	3.61449	-0.965804	0.000150921	0.0277036
721	35.2	not assigned.unknown	|MERCATOR: (original description: no original description)||BREAD.WHEAT.TIGR: TA67956_4565; Methyltransferase, UbiE/COQ5 family, putative [Oryza sativa (japonica cultivar-group)]; Evalue=0; %ident=100|	-9.72557	-0.308193	0.000126563	0.0257943
1258	35.2	not assigned.unknown	|MERCATOR: (original description: no original description)||TAGI: TC383928;weakly similar to UniRef100_Q6H7Q8 Cluster: Tubulin-specific chaperone C-like protein; n=1; Oryza sativa Japonica Group;Rep: Tubulin-specific chaperone C-like protein - Oryza sativa subsp. japonica (Rice), partial (3%);Evalue=0;%ident=100|MAPMANSTORE: weakly similar to UniRef100_Q6H7Q8 Cluster: Tubulin-specific chaperone C…	-9.08545	-0.895684	0.000462689	0.043864
1651	35.2	not assigned.unknown	|MERCATOR: (loc_os07g02480.1 : 180.0) no description available & (at5g45480 : 67.4) Protein of unknown function (DUF594); FUNCTIONS IN: molecular_function unknown; INVOLVED IN: biological_process unknown; LOCATED IN: plasma membrane; EXPRESSED IN: 17 plant structures; EXPRESSED DURING: 12 growth stages; CONTAINS InterPro DOMAIN/s: Protein of unknown function DUF594 (InterPro:IPR007658); BEST Arab…	-10.9231	0.873028	1.24083e-05	0.00970246
1953	35.2	not assigned.unknown	|MERCATOR: (original description: no original description)||TAGI: CA635858;similar to UniRef100_Q0D5H3 Cluster: Os07g0561500 protein; n=1; Oryza sativa Japonica Group;Rep: Os07g0561500 protein - Oryza sativa subsp. japonica (Rice), partial (10%);Evalue=1E-85;%ident=100|MAPMANSTORE: similar to UniRef100_Q0D5H3 Cluster: Os07g0561500 protein; n=1; Oryza sativa Japonica Group;Rep: Os07g0561500 protei…	-8.91448	-1.05177	1.31573e-05	0.00987225
2052	35.2	not assigned.unknown	|MERCATOR: (original description: no original description)||TAGI: TC377503;similar to UniRef100_A4AZK1 Cluster: NAD-dependent aldehyde dehydrogenase; n=1; Alteromonas macleodii 'Deep ecotype';Rep: NAD-dependent aldehyde dehydrogenase - Alteromonas macleodii 'Deep ecotype', partial (4%);Evalue=0;%ident=100|MAPMANSTORE: similar to UniRef100_A4AZK1 Cluster: NAD-dependent aldehyde dehydrogenase; n=1;…	-8.40244	0.10721	6.60108e-05	0.0205526
3491	35.2	not assigned.unknown	|MERCATOR: (original description: no original description)|	-5.84463	-2.29453	0.000424797	0.0430371
3574	35.2	not assigned.unknown	|MERCATOR: (original description: no original description)||BRACHYPODIUM GENOME: Bradi1g17380.1 ; moderately similar to ( 259) AT5G17780 | Symbols: | hydrolase, alpha/beta fold family protein | chr5:5867429-5868976 REVERSEmoderately similar to ( 327) loc_os07g48610 12007.m09072 protein catalytic/ hydrolase, putative, expressed Abhydrolase_1 MhpC no original description||RICE GENOME: Loc_Os07g4861…	4.71314	-1.81398	0.000416204	0.0429096
3744	35.2	not assigned.unknown	|MERCATOR: (original description: no original description)|	-9.97397	-0.071624	0.000159647	0.0285229
3995	35.2	not assigned.unknown	|MERCATOR: (original description: no original description)||TAGI: BQ170278;;Evalue=4E-90;%ident=93.67|MAPMANSTORE: 0||BREAD.WHEAT.TIGR: BQ170278; BQ170278; Evalue=5E-90; %ident=93.67|	4.7295	-2.24233	0.000181887	0.0300858
4111	35.2	not assigned.unknown	|MERCATOR: (original description: no original description)||TAGI: TC374324;weakly similar to UniRef100_P49455 Cluster: Tropomyosin-1, isoforms 33/34; n=1; Drosophila melanogaster;Rep: Tropomyosin-1, isoforms 33/34 - Drosophila melanogaster (Fruit fly), partial (5%);Evalue=0;%ident=100|MAPMANSTORE: weakly similar to UniRef100_P49455 Cluster: Tropomyosin-1, isoforms 33/34; n=1; Drosophila melanogas…	-9.20881	-0.778918	5.76637e-06	0.00797176
5691	35.2	not assigned.unknown	|MERCATOR: (original description: no original description)|	3.53569	-2.0085	0.00042546	0.0430371
6267	35.2	not assigned.unknown	|MERCATOR: (original description: no original description)||BRACHYPODIUM GENOME: Bradi1g22780.1 ; very weakly similar to (94.0) ATMG00310 | Symbols: ORF154 | hypothetical protein | chrM:90883-91347 REVERSEmoderately similar to ( 310) loc_os12g29700 12012.m06784 protein retrotransposon protein, putative, unclassifiedRT_nLTR_like RVT_1 no original description||RICE GENOME: Loc_Os01g33750.1 ; 12001.…	3.15372	-1.39746	0.000493947	0.0451904
6359	35.2	not assigned.unknown	|MERCATOR: (original description: no original description)||TAGI: TC418796;similar to UniRef100_A3KAW2 Cluster: DNA-binding protein, excisionase family; n=1; Sagittula stellata E-37;Rep: DNA-binding protein, excisionase family - Sagittula stellata E-37, partial (8%);Evalue=0;%ident=100|MAPMANSTORE: similar to UniRef100_A3KAW2 Cluster: DNA-binding protein, excisionase family; n=1; Sagittula stella…	-6.52755	-1.46035	2.76239e-05	0.0135369
6559	35.2	not assigned.unknown	|MERCATOR: (original description: no original description)||BREAD.WHEAT.TIGR: TA52986_4565; Delta 1-pyrroline-5-carboxylate synthetase [Triticum aestivum (Wheat)]; Evalue=0; %ident=98.72|	-9.34827	-0.648268	0.000213381	0.03228
6668	35.2	not assigned.unknown	|MERCATOR: (original description: no original description)||TAGI: TC390970;homologue to UniRef100_A9SHH6 Cluster: Predicted protein; n=1; Physcomitrella patens subsp. patens;Rep: Predicted protein - Physcomitrella patens subsp. patens, partial (6%);Evalue=0;%ident=100|MAPMANSTORE: homologue to UniRef100_A9SHH6 Cluster: Predicted protein; n=1; Physcomitrella patens subsp. patens;Rep: Predicted pro…	-9.35755	-0.645493	0.000108057	0.0243833
6843	35.2	not assigned.unknown	|MERCATOR: (original description: no original description)||BREAD.WHEAT.TIGR: CD899593; H0801D08.2 protein [Oryza sativa (Rice)]; Evalue=0; %ident=94.07|	-9.57725	-0.431455	0.000161391	0.0287491
7538	35.2	not assigned.unknown	|MERCATOR: (original description: no original description)||TAGI: TC373645;similar to UniRef100_Q7PZ45 Cluster: AGAP011722-PA; n=1; Anopheles gambiae str. PEST;Rep: AGAP011722-PA - Anopheles gambiae str. PEST, partial (3%);Evalue=0;%ident=99.55|MAPMANSTORE: similar to UniRef100_Q7PZ45 Cluster: AGAP011722-PA; n=1; Anopheles gambiae str. PEST;Rep: AGAP011722-PA - Anopheles gambiae str. PEST, partia…	-8.84274	-1.09456	0.000462921	0.043864
8703	35.2	not assigned.unknown	|MERCATOR: (original description: no original description)|	-8.73005	-1.21682	1.19452e-05	0.00949673
8715	35.2	not assigned.unknown	|MERCATOR: (original description: no original description)||TAGI: TC429909;;Evalue=2E-121;%ident=99.58|MAPMANSTORE: 0|	-7.54449	-0.660399	1.5315e-05	0.0105155
8745	35.2	not assigned.unknown	|MERCATOR: (original description: no original description)|	9.19856	-0.558184	0.000436087	0.0431245
9112	35.2	not assigned.unknown	|MERCATOR: (original description: no original description)||TAGI: TC395248;similar to UniRef100_A5P4U8 Cluster: Amidase; n=1; Methylobacterium sp. 4-46;Rep: Amidase - Methylobacterium sp. 4-46, partial (5%);Evalue=2E-159;%ident=99.68|MAPMANSTORE: similar to UniRef100_A5P4U8 Cluster: Amidase; n=1; Methylobacterium sp. 4-46;Rep: Amidase - Methylobacterium sp. 4-46, partial (5%)|	-6.4149	-1.62142	0.000300158	0.0370448
10078	35.2	not assigned.unknown	|MERCATOR: (loc_os06g47310.1 : 218.0) no description available & (at5g67210 : 149.0) Protein of unknown function (DUF579); CONTAINS InterPro DOMAIN/s: Protein of unknown function DUF579 (InterPro:IPR021148), Conserved hypothetical protein CHP01627 (InterPro:IPR006514); BEST Arabidopsis thaliana protein match is: Protein of unknown function (DUF579) (TAIR:AT3G50220.1); Has 1807 Blast hits to 1807 …	5.57395	-1.78172	0.000470686	0.0444193
10458	35.2	not assigned.unknown	|MERCATOR: (original description: no original description)|	-7.38189	-0.803484	0.000331494	0.0391351
10705	35.2	not assigned.unknown	|MERCATOR: (original description: no original description)||TAGI: TC433817;similar to UniRef100_A7XW34 Cluster: Gonadoliberin; n=1; Acanthopagrus schlegelii;Rep: Gonadoliberin - Acanthopagrus schlegeli (Black porgy), partial (14%);Evalue=0;%ident=99.85|MAPMANSTORE: similar to UniRef100_A7XW34 Cluster: Gonadoliberin; n=1; Acanthopagrus schlegelii;Rep: Gonadoliberin - Acanthopagrus schlegeli (Black…	-9.41652	-0.599865	0.000287272	0.0363369
10986	35.2	not assigned.unknown	|MERCATOR: (original description: no original description)||TAGI: TC381172;;Evalue=3E-172;%ident=99.7|MAPMANSTORE: 0||BREAD.WHEAT.TIGR: TA92185_4565; TA92185_4565; Evalue=4E-172; %ident=99.7|	-8.88623	-1.08307	0.000590909	0.0492089
11950	35.2	not assigned.unknown	|MERCATOR: (original description: no original description)|	9.07544	-0.663725	0.000498067	0.0452857
13578	35.2	not assigned.unknown	|MERCATOR: (original description: no original description)||TAGI: TC424682;weakly similar to UniRef100_Q017V2 Cluster: Chromosome 06 contig 1, DNA sequence; n=1; Ostreococcus tauri;Rep: Chromosome 06 contig 1, DNA sequence - Ostreococcus tauri, partial (5%);Evalue=0;%ident=100|MAPMANSTORE: weakly similar to UniRef100_Q017V2 Cluster: Chromosome 06 contig 1, DNA sequence; n=1; Ostreococcus tauri;Re…	-9.21014	-0.790563	0.00037463	0.0409235
13613	35.2	not assigned.unknown	|MERCATOR: (original description: no original description)|	-5.65206	1.95136	0.000201768	0.0317186
13827	35.2	not assigned.unknown	|MERCATOR: (original description: no original description)||TAGI: CA677400;similar to UniRef100_A5NW51 Cluster: Transcriptional regulator, TetR family; n=1; Methylobacterium sp. 4-46;Rep: Transcriptional regulator, TetR family - Methylobacterium sp. 4-46, partial (3%);Evalue=2E-115;%ident=98.71|MAPMANSTORE: similar to UniRef100_A5NW51 Cluster: Transcriptional regulator, TetR family; n=1; Methylob…	8.2604	1.25318	0.000250759	0.0341582
15516	35.2	not assigned.unknown	|MERCATOR: (original description: no original description)|	2.82003	0.813267	1.4439e-05	0.0101969
16112	35.2	not assigned.unknown	|MERCATOR: (original description: no original description)|	6.01158	-2.3479	0.000192814	0.031066
16602	35.2	not assigned.unknown	|MERCATOR: (original description: no original description)||TAGI: TC379775;similar to UniRef100_A7Q8L0 Cluster: Chromosome chr5 scaffold_64, whole genome shotgun sequence; n=1; Vitis vinifera;Rep: Chromosome chr5 scaffold_64, whole genome shotgun sequence - Vitis vinifera (Grape), partial (13%);Evalue=0;%ident=99.71|MAPMANSTORE: similar to UniRef100_A7Q8L0 Cluster: Chromosome chr5 scaffold_64, wh…	-8.90654	-1.06079	8.63917e-06	0.00845964
17146	35.2	not assigned.unknown	|MERCATOR: (original description: no original description)|	4.25793	-1.94364	0.000293035	0.0368337
17208	35.2	not assigned.unknown	|MERCATOR: (original description: no original description)||TAGI: TC427065;weakly similar to UniRef100_A9USQ9 Cluster: Predicted protein; n=1; Monosiga brevicollis MX1;Rep: Predicted protein - Monosiga brevicollis MX1, partial (12%);Evalue=0;%ident=99.78|MAPMANSTORE: weakly similar to UniRef100_A9USQ9 Cluster: Predicted protein; n=1; Monosiga brevicollis MX1;Rep: Predicted protein - Monosiga brev…	-10.4059	0.348232	1.32813e-05	0.00987225
17428	35.2	not assigned.unknown	|MERCATOR: (original description: no original description)|	5.97702	-1.0578	0.000556547	0.0477212
18119	35.2	not assigned.unknown	|MERCATOR: (original description: no original description)|	4.3888	-1.72098	0.000426817	0.0430371
18360	35.2	not assigned.unknown	|MERCATOR: (original description: no original description)||TAGI: TC393002;similar to UniRef100_Q0E0W7 Cluster: Os02g0516400 protein; n=1; Oryza sativa Japonica Group;Rep: Os02g0516400 protein - Oryza sativa subsp. japonica (Rice), partial (7%);Evalue=0;%ident=100|MAPMANSTORE: similar to UniRef100_Q0E0W7 Cluster: Os02g0516400 protein; n=1; Oryza sativa Japonica Group;Rep: Os02g0516400 protein - O…	-6.60244	0.363321	0.000447262	0.0433439
18885	35.2	not assigned.unknown	|MERCATOR: (original description: no original description)||TAGI: TC426492;;Evalue=0;%ident=97|MAPMANSTORE: 0||BREAD.WHEAT.TIGR: CA669283; CA669283; Evalue=0; %ident=97.22|	-7.67856	-1.98496	0.000253754	0.0343234
19156	35.2	not assigned.unknown	|MERCATOR: (original description: no original description)||TAGI: TC384326;;Evalue=0;%ident=100|MAPMANSTORE: 0|	3.64543	-0.680513	0.000574497	0.0482405
20239	35.2	not assigned.unknown	|MERCATOR: (original description: no original description)|	-2.95956	1.15371	0.000437615	0.043194
22502	35.2	not assigned.unknown	|MERCATOR: (original description: no original description)|	7.31436	0.87921	0.000234405	0.0331534
23910	35.2	not assigned.unknown	|MERCATOR: (original description: no original description)||TAGI: TC431458;homologue to UniRef100_A8J5P0 Cluster: mRNA cap-binding protein; n=1; Chlamydomonas reinhardtii;Rep: mRNA cap-binding protein - Chlamydomonas reinhardtii, partial (3%);Evalue=0;%ident=100|MAPMANSTORE: homologue to UniRef100_A8J5P0 Cluster: mRNA cap-binding protein; n=1; Chlamydomonas reinhardtii;Rep: mRNA cap-binding prote…	-8.77526	1.65765	0.00031707	0.0382574
24950	35.2	not assigned.unknown	|MERCATOR: (original description: no original description)|	9.51749	-0.223191	8.65683e-05	0.0236979
25177	35.2	not assigned.unknown	|MERCATOR: (original description: no original description)||TAGI: TC445754;similar to UniRef100_A7PH99 Cluster: Chromosome chr17 scaffold_16, whole genome shotgun sequence; n=1; Vitis vinifera;Rep: Chromosome chr17 scaffold_16, whole genome shotgun sequence - Vitis vinifera (Grape), partial (74%);Evalue=1E-110;%ident=99.1|MAPMANSTORE: weakly similar to ( 107) AT3G17930 ; Symbols: ; unknown protei…	5.76057	1.20017	0.000215127	0.0323814
25235	35.2	not assigned.unknown	|MERCATOR: (original description: no original description)||TAGI: TC442974;;Evalue=9E-128;%ident=99.6|MAPMANSTORE: 0||DURUM.WHEAT.TIGR: AJ716550; AJ716550; Evalue=2E-25; %ident=94.44||BREAD.WHEAT.TIGR: CA676694; CA676694; Evalue=1E-117; %ident=98.74|	-4.30295	-0.290027	0.000485567	0.045047
25625	35.2	not assigned.unknown	|MERCATOR: (original description: no original description)||TAGI: CD882352;weakly similar to UniRef100_Q6RIB0 Cluster: Flowering promoting factor-like 1; n=1; Nicotiana tabacum;Rep: Flowering promoting factor-like 1 - Nicotiana tabacum (Common tobacco), partial (89%);Evalue=3E-111;%ident=99.11|MAPMANSTORE: weakly similar to ( 103) AT5G24860 ; Symbols: FPF1 ; FPF1 (FLOWERING PROMOTING FACTOR 1) ; …	-8.22818	-0.0254464	0.000402629	0.0423274
26783	35.2	not assigned.unknown	|MERCATOR: (original description: no original description)||TAGI: TC446178;similar to UniRef100_A7PNE8 Cluster: Chromosome chr1 scaffold_22, whole genome shotgun sequence; n=1; Vitis vinifera;Rep: Chromosome chr1 scaffold_22, whole genome shotgun sequence - Vitis vinifera (Grape), partial (70%);Evalue=2E-107;%ident=100|MAPMANSTORE: weakly similar to ( 189) AT3G19900 ; Symbols: ; unknown protein ;…	-9.62293	-0.399281	0.000244226	0.0336097
26918	35.2	not assigned.unknown	|MERCATOR: (original description: no original description)||TAGI: TC396534;similar to UniRef100_Q5CM36 Cluster: Multi-pass transmembrane protein; n=1; Cryptosporidium hominis;Rep: Multi-pass transmembrane protein - Cryptosporidium hominis, partial (7%);Evalue=0;%ident=100|MAPMANSTORE: similar to UniRef100_Q5CM36 Cluster: Multi-pass transmembrane protein; n=1; Cryptosporidium hominis;Rep: Multi-pa…	-9.91566	1.7338	0.000103339	0.0241662
27751	35.2	not assigned.unknown	|MERCATOR: (original description: no original description)||TAGI: TC459151;homologue to UniRef100_Q6L724 Cluster: ATP-dependent RNA helicase; n=1; Hordeum vulgare;Rep: ATP-dependent RNA helicase - Hordeum vulgare (Barley), partial (15%);Evalue=2E-124;%ident=100|MAPMANSTORE: homologue to UniRef100_Q6L724 Cluster: ATP-dependent RNA helicase; n=1; Hordeum vulgare;Rep: ATP-dependent RNA helicase - Ho…	-5.94576	0.251314	0.00050178	0.0454311
28669	35.2	not assigned.unknown	|MERCATOR: (original description: no original description)|	-6.494	-1.41413	0.000120023	0.0254141
28921	35.2	not assigned.unknown	|MERCATOR: (original description: no original description)||TAGI: TC438815;;Evalue=0;%ident=99.74|MAPMANSTORE: 0||BREAD.WHEAT.TIGR: TA104465_4565; TA104465_4565; Evalue=0; %ident=99.74|	-11.7142	1.64673	3.32463e-05	0.0142981
28929	35.2	not assigned.unknown	|MERCATOR: (original description: no original description)||TAGI: TC399428;similar to UniRef100_Q2KV65 Cluster: Chemotaxis response regulator protein-glutamate methylesterase 1; n=1; Bordetella avium 197N;Rep: Chemotaxis response regulator protein-glutamate methylesterase 1 - Bordetella avium (strain 197N), partial (6%);Evalue=0;%ident=100|MAPMANSTORE: similar to UniRef100_Q2KV65 Cluster: Chemota…	-7.55784	-0.57494	0.000217483	0.0324925
28944	35.2	not assigned.unknown	|MERCATOR: (original description: no original description)||TAGI: CA721136;homologue to UniRef100_A6R6Q7 Cluster: Predicted protein; n=1; Ajellomyces capsulatus NAm1;Rep: Predicted protein - Ajellomyces capsulata (strain NAm1) (Histoplasma capsulatum), partial (8%);Evalue=3E-137;%ident=99.26|MAPMANSTORE: homologue to UniRef100_A6R6Q7 Cluster: Predicted protein; n=1; Ajellomyces capsulatus NAm1;Re…	7.67863	-1.77034	0.000308521	0.0376027
29230	35.2	not assigned.unknown	|MERCATOR: (original description: no original description)||TAGI: TC419078;;Evalue=3E-152;%ident=99|MAPMANSTORE: 0||BREAD.WHEAT.TIGR: CJ649753; CJ649753; Evalue=4E-152; %ident=99|	-7.80592	-1.9639	0.000541395	0.0472418
29356	35.2	not assigned.unknown	|MERCATOR: (original description: no original description)|	-8.02457	0.964114	7.5355e-05	0.02235
29499	35.2	not assigned.unknown	|MERCATOR: (original description: no original description)|	-5.31601	-0.834772	0.000196099	0.0313182
29572	35.2	not assigned.unknown	|MERCATOR: (original description: no original description)||TAGI: CA723131;similar to UniRef100_A3RL57 Cluster: EREB; n=1; Saccharum arundinaceum;Rep: EREB - Saccharum arundinaceum, partial (9%);Evalue=2E-112;%ident=99.12|MAPMANSTORE: similar to UniRef100_A3RL57 Cluster: EREB; n=1; Saccharum arundinaceum;Rep: EREB - Saccharum arundinaceum, partial (9%)||DURUM.WHEAT.TIGR: AJ614197; BTH-induced ERF…	4.12769	-0.149843	2.98763e-05	0.0138456
29741	35.2	not assigned.unknown	|MERCATOR: (original description: no original description)||TAGI: TC394343;similar to UniRef100_A0LWJ7 Cluster: Type IV pilus assembly PilZ; n=1; Acidothermus cellulolyticus 11B;Rep: Type IV pilus assembly PilZ - Acidothermus cellulolyticus (strain ATCC 43068 / 11B), partial (9%);Evalue=0;%ident=100|MAPMANSTORE: similar to UniRef100_A0LWJ7 Cluster: Type IV pilus assembly PilZ; n=1; Acidothermus c…	-7.47735	-0.0563213	0.000217233	0.0324925
29775	35.2	not assigned.unknown	|MERCATOR: (original description: no original description)||TAGI: TC420192;similar to UniRef100_Q1DIT2 Cluster: Predicted protein; n=1; Coccidioides immitis;Rep: Predicted protein - Coccidioides immitis, partial (9%);Evalue=1E-83;%ident=92.34|MAPMANSTORE: similar to UniRef100_Q1DIT2 Cluster: Predicted protein; n=1; Coccidioides immitis;Rep: Predicted protein - Coccidioides immitis, partial (9%)||…	-9.12228	-0.863018	0.000113556	0.0250443
30700	35.2	not assigned.unknown	|MERCATOR: (original description: no original description)||TAGI: TC456311;;Evalue=0;%ident=96.22|MAPMANSTORE: 0||BREAD.WHEAT.TIGR: CD890026; CD890026; Evalue=0; %ident=99.35|	-9.64797	1.31007	8.86954e-05	0.0236979
30769	35.2	not assigned.unknown	|MERCATOR: (original description: no original description)||BRACHYPODIUM GENOME: Bradi5g10910.1 ; no original description|	-7.49823	0.90161	0.00013793	0.026703
30830	35.2	not assigned.unknown	|MERCATOR: (original description: no original description)||TAGI: TC422237;similar to UniRef100_A7Q6E0 Cluster: Chromosome chr11 scaffold_56, whole genome shotgun sequence; n=1; Vitis vinifera;Rep: Chromosome chr11 scaffold_56, whole genome shotgun sequence - Vitis vinifera (Grape), partial (10%);Evalue=1E-150;%ident=100|MAPMANSTORE: similar to UniRef100_A7Q6E0 Cluster: Chromosome chr11 scaffold_…	-7.94762	-0.296413	0.000159566	0.0285229
31392	35.2	not assigned.unknown	|MERCATOR: (original description: no original description)||TAGI: TC421784;;Evalue=0;%ident=99.45|MAPMANSTORE: 0||BREAD.WHEAT.TIGR: CK156883; CK156883; Evalue=0; %ident=99.05|	-10.5837	0.539356	3.58268e-05	0.0146741
31463	35.2	not assigned.unknown	|MERCATOR: (original description: no original description)|	-7.88693	-0.326993	0.000239836	0.0334266
31716	35.2	not assigned.unknown	|MERCATOR: (original description: no original description)||TAGI: TC419687;;Evalue=0;%ident=99.76|MAPMANSTORE: weakly similar to ( 160) loc_os02g44880 12002.m09528 protein expressed protein||BREAD.WHEAT.TIGR: CA686833; OSJNBa0084K11.22 protein [Oryza sativa (japonica cultivar-group)]; Evalue=0; %ident=97.19||BRACHYPODIUM GENOME: Bradi3g51180.1 ; moderately similar to ( 245) loc_os02g44880 12002.m…	6.66479	-0.439326	0.000179232	0.0298105
31824	35.2	not assigned.unknown	|MERCATOR: no hits & (original description: no original description)||TAGI: TC388310;;Evalue=4E-100;%ident=97.65|MAPMANSTORE: 0||BREAD.WHEAT.TIGR: CV766448; CV766448; Evalue=1E-101; %ident=98.11|	-9.91761	-0.125687	6.65235e-05	0.0205526
31992	35.2	not assigned.unknown	|MERCATOR: (original description: no original description)|	4.51677	-0.230546	6.56194e-06	0.00798686
32211	35.2	not assigned.unknown	|MERCATOR: (original description: no original description)||TAGI: TC370368;similar to UniRef100_Q1LUE5 Cluster: Zinc finger CCCH domain-containing protein 18; n=1; Danio rerio;Rep: Zinc finger CCCH domain-containing protein 18 - Danio rerio (Zebrafish) (Brachydanio rerio), partial (3%);Evalue=0;%ident=100|MAPMANSTORE: similar to UniRef100_Q1LUE5 Cluster: Zinc finger CCCH domain-containing protein…	-10.9069	0.845045	4.60821e-05	0.0172333
32428	35.2	not assigned.unknown	|MERCATOR: (original description: no original description)||TAGI: BG313704;similar to UniRef100_A5U1D8 Cluster: PE-PGRS family protein; n=1; Mycobacterium tuberculosis H37Ra;Rep: PE-PGRS family protein - Mycobacterium tuberculosis (strain ATCC 25177 / H37Ra), partial (5%);Evalue=2E-117;%ident=100|MAPMANSTORE: similar to UniRef100_A5U1D8 Cluster: PE-PGRS family protein; n=1; Mycobacterium tubercul…	3.88013	-0.125916	0.000267398	0.0351914
32823	35.2	not assigned.unknown	|MERCATOR: no hits & (original description: no original description)||TAGI: BJ312840;similar to UniRef100_A9SBX1 Cluster: Predicted protein; n=1; Physcomitrella patens subsp. patens;Rep: Predicted protein -, partial (2%);Evalue=1E-31;%ident=100|MAPMANSTORE: similar to UniRef100_A9SBX1 Cluster: Predicted protein; n=1; Physcomitrella patens subsp. patens;Rep: Predicted protein -, partial (2%)||BREA…	-6.68378	-1.40337	0.000104262	0.0241662
32860	35.2	not assigned.unknown	|MERCATOR: (original description: no original description)|	8.05801	0.893096	0.000400294	0.0423274
33263	35.2	not assigned.unknown	|MERCATOR: (original description: no original description)||TAGI: TC444531;weakly similar to UniRef100_Q948Y7 Cluster: VMP3 protein; n=1; Volvox carteri f. nagariensis;Rep: VMP3 protein - Volvox carteri f. nagariensis, partial (5%);Evalue=3E-96;%ident=95.11|MAPMANSTORE: weakly similar to UniRef100_Q948Y7 Cluster: VMP3 protein; n=1; Volvox carteri f. nagariensis;Rep: VMP3 protein - Volvox carteri …	6.27241	-0.62277	0.000127843	0.0257943
33361	35.2	not assigned.unknown	|MERCATOR: (original description: no original description)||TAGI: BG263170;weakly similar to UniRef100_UPI0000E24CDF Cluster: PREDICTED: Cdk5 and Abl enzyme substrate 1; n=1; Pan troglodytes;Rep: PREDICTED: Cdk5 and Abl enzyme substrate 1 - Pan troglodytes, partial (5%);Evalue=1E-109;%ident=100|MAPMANSTORE: weakly similar to UniRef100_UPI0000E24CDF Cluster: PREDICTED: Cdk5 and Abl enzyme substrat…	5.68885	-0.611437	0.000268424	0.0351914
33406	35.2	not assigned.unknown	|MERCATOR: (original description: no original description)|	-9.00903	-0.973243	0.000499272	0.0452857
33699	35.2	not assigned.unknown	|MERCATOR: (original description: no original description)|	5.63106	-1.20936	0.000375329	0.0409235
33870	35.2	not assigned.unknown	|MERCATOR: (original description: no original description)||TAGI: TC461406;homologue to UniRef100_A3WB79 Cluster: Ferrichrome ABC transporter ATP-binding protein; n=1; Erythrobacter sp. NAP1;Rep: Ferrichrome ABC transporter ATP-binding protein - Erythrobacter sp. NAP1, partial (6%);Evalue=0.0000007;%ident=100|MAPMANSTORE: homologue to UniRef100_A3WB79 Cluster: Ferrichrome ABC transporter ATP-bind…	-8.71814	0.543406	0.0001751	0.0295311
33905	35.2	not assigned.unknown	|MERCATOR: (original description: no original description)|	-6.16049	-2.09597	0.000386856	0.0417423
34487	35.2	not assigned.unknown	|MERCATOR: (original description: no original description)||TAGI: CJ671299;similar to UniRef100_Q6PBI4 Cluster: Histone deacetylase 9-B; n=1; Danio rerio;Rep: Histone deacetylase 9-B - Danio rerio (Zebrafish) (Brachydanio rerio), partial (4%);Evalue=0;%ident=100|MAPMANSTORE: similar to UniRef100_Q6PBI4 Cluster: Histone deacetylase 9-B; n=1; Danio rerio;Rep: Histone deacetylase 9-B - Danio rerio (…	-9.13123	-0.862641	0.000419217	0.0430352
34811	35.2	not assigned.unknown	|MERCATOR: (original description: no original description)|	-9.26856	-0.723005	0.00023647	0.0331778
35030	35.2	not assigned.unknown	|MERCATOR: (original description: no original description)|	-8.2301	0.0583499	0.000105962	0.0241662
35070	35.2	not assigned.unknown	|MERCATOR: (original description: no original description)||TAGI: TC381853;;Evalue=0;%ident=97.31|MAPMANSTORE: 0||BREAD.WHEAT.TIGR: TA81921_4565; TA81921_4565; Evalue=0; %ident=100|	-11.35	1.29145	1.78439e-05	0.0111069
35361	35.2	not assigned.unknown	|MERCATOR: (original description: no original description)|	4.09912	0.353307	6.6075e-05	0.0205526
36132	35.2	not assigned.unknown	|MERCATOR: (original description: no original description)||TAGI: CV767110;;Evalue=0;%ident=100|MAPMANSTORE: 0||BREAD.WHEAT.TIGR: CV767110; CV767110; Evalue=0; %ident=100|	-8.92834	-1.04556	0.000562564	0.0477212
36227	35.2	not assigned.unknown	|MERCATOR: no hits & (original description: no original description)||TAGI: TC375171;;Evalue=4E-115;%ident=100|MAPMANSTORE: 0|	-8.32067	-1.55071	0.000573158	0.0482405
36324	35.2	not assigned.unknown	|MERCATOR: (original description: no original description)||TAGI: BE604914;;Evalue=2E-79;%ident=99.39|MAPMANSTORE: 0||BREAD.WHEAT.TIGR: BE604914; BE604914; Evalue=3E-79; %ident=99.39|	-8.4821	-1.44144	2.62619e-05	0.0133085
36535	35.2	not assigned.unknown	|MERCATOR: (original description: no original description)||TAGI: CJ569897;;Evalue=4E-123;%ident=93.07|MAPMANSTORE: 0||BREAD.WHEAT.TIGR: CJ569897; CJ569897; Evalue=5E-123; %ident=93.07|	-8.42442	-1.4825	0.000560266	0.0477212
36663	35.2	not assigned.unknown	|MERCATOR: (original description: no original description)||TAGI: TC434966;UniRef100_A9VC44 Cluster: Predicted protein; n=1; Monosiga brevicollis MX1;Rep: Predicted protein - Monosiga brevicollis MX1, partial (9%);Evalue=0;%ident=100|MAPMANSTORE: UniRef100_A9VC44 Cluster: Predicted protein; n=1; Monosiga brevicollis MX1;Rep: Predicted protein - Monosiga brevicollis MX1, partial (9%)||BREAD.WHEAT.…	-8.93867	-1.03633	0.000555669	0.0477212
37851	35.2	not assigned.unknown	|MERCATOR: (original description: no original description)||TAGI: CA729760;;Evalue=2E-150;%ident=100|MAPMANSTORE: very weakly similar to (87.0) loc_os01g66170 12001.m12725 protein expressed protein||BREAD.WHEAT.TIGR: CA729760; CA729760; Evalue=3E-150; %ident=100||BRACHYPODIUM GENOME: Bradi2g57150.1 ; moderately similar to ( 266) AT1G22850 | Symbols: | INVOLVED IN: biological_process unknown; LOCA…	4.3109	2.24155	3.24933e-05	0.0141742
38211	35.2	not assigned.unknown	|MERCATOR: (original description: no original description)||TAGI: TC440542;similar to UniRef100_Q2IMJ3 Cluster: LigA; n=1; Anaeromyxobacter dehalogenans 2CP-C;Rep: LigA - Anaeromyxobacter dehalogenans (strain 2CP-C), partial (6%);Evalue=0;%ident=97.92|MAPMANSTORE: weakly similar to ( 109) loc_os08g04590 12008.m04602 protein csAtPR5, putative similar to UniRef100_Q2IMJ3 Cluster: LigA; n=1; Anaerom…	-5.29146	0.0279061	2.8893e-05	0.0138083
38958	35.2	not assigned.unknown	|MERCATOR: (original description: no original description)||TAGI: TC383411;;Evalue=0;%ident=99.01|MAPMANSTORE: 0||BREAD.WHEAT.TIGR: DR739373; DR739373; Evalue=0; %ident=99.01|	-6.05119	-0.11651	0.000417234	0.0429423
39093	35.2	not assigned.unknown	|MERCATOR: (original description: no original description)|	-4.11125	-0.896753	0.000228711	0.0331534
39895	35.2	not assigned.unknown	|MERCATOR: (original description: no original description)||TAGI: TC386880;homologue to UniRef100_A9VBA9 Cluster: Predicted protein; n=1; Monosiga brevicollis MX1;Rep: Predicted protein - Monosiga brevicollis MX1, partial (3%);Evalue=2E-100;%ident=94.61|MAPMANSTORE: homologue to UniRef100_A9VBA9 Cluster: Predicted protein; n=1; Monosiga brevicollis MX1;Rep: Predicted protein - Monosiga brevicolli…	-8.11461	-0.130628	2.19625e-06	0.00482946
39929	35.2	not assigned.unknown	|MERCATOR: (original description: no original description)||TAGI: TC433018;;Evalue=6E-60;%ident=97.79|MAPMANSTORE: 0||BREAD.WHEAT.TIGR: CK197963; CK197963; Evalue=8E-65; %ident=100||BRACHYPODIUM GENOME: Bradi3g16830.1 ; no original description||RICE GENOME: Loc_Os05g48790.3 ; 12005.m27972 protein expressed protein|	-10.4492	0.39283	0.000102152	0.0241662
40230	35.2	not assigned.unknown	|MERCATOR: (original description: no original description)||TAGI: TC432281;homologue to gb;AF104926.1;AF104926 Verticillium dahliae 18S ribosomal RNA gene, internal transcribed spacer 1, 5.8S ribosomal RNA gene, internal transcribed spacer 2, and 28S ribosomal RNA gene, complete sequence, partial (3%);Evalue=3E-33;%ident=80.61|MAPMANSTORE: homologue to gb;AF104926.1;AF104926 Verticillium dahliae …	9.75244	-0.0120343	0.000278083	0.0356757
40316	35.2	not assigned.unknown	|MERCATOR: (original description: no original description)|	4.28179	-2.21124	0.000295667	0.0368568
40335	35.2	not assigned.unknown	|MERCATOR: (original description: no original description)||TAGI: TC427489;;Evalue=0;%ident=100|MAPMANSTORE: 0||BREAD.WHEAT.TIGR: BJ272164; BJ272164; Evalue=6E-173; %ident=100|	-7.84415	0.485042	5.58106e-05	0.0194237
40360	35.2	not assigned.unknown	|MERCATOR: (original description: no original description)||TAGI: CN008068;;Evalue=2E-92;%ident=100|MAPMANSTORE: 0||BREAD.WHEAT.TIGR: CN008068; CN008068; Evalue=2E-92; %ident=100|	-9.22025	-0.778342	0.000135977	0.0264952
41017	35.2	not assigned.unknown	|MERCATOR: (original description: no original description)||TAGI: TC422377;;Evalue=0;%ident=100|MAPMANSTORE: 0||BREAD.WHEAT.TIGR: TA79811_4565; TA79811_4565; Evalue=0; %ident=100|	-9.73227	2.80823	6.42194e-05	0.0205526
41081	35.2	not assigned.unknown	|MERCATOR: (original description: no original description)||TAGI: TC420995;similar to UniRef100_A7PPD1 Cluster: Chromosome chr8 scaffold_23, whole genome shotgun sequence; n=1; Vitis vinifera;Rep: Chromosome chr8 scaffold_23, whole genome shotgun sequence - Vitis vinifera (Grape), partial (75%);Evalue=6E-66;%ident=91.4|MAPMANSTORE: moderately similar to ( 410) AT5G03880 ; Symbols: ; electron carr…	-8.26569	0.0108208	3.34937e-06	0.00576177
41201	35.2	not assigned.unknown	|MERCATOR: (original description: no original description)||TAGI: TC387768;;Evalue=1E-137;%ident=96.03|MAPMANSTORE: weakly similar to ( 169) AT1G52870 ; Symbols: ; peroxisomal membrane protein-related ; chr1:19685856-19687678 FORWARDweakly similar to ( 189) loc_os03g38730 12003.m35298 protein mpv17 / PMP22 family protein, expressed||BREAD.WHEAT.TIGR: CV776439; Putative peroxisomal membrane protei…	5.0015	3.46677	1.83745e-05	0.011156
41426	35.2	not assigned.unknown	|MERCATOR: (original description: no original description)||TAGI: CK215633;weakly similar to UniRef100_A7QVP6 Cluster: Chromosome chr14 scaffold_190, whole genome shotgun sequence; n=2; Vitis vinifera;Rep: Chromosome chr14 scaffold_190, whole genome shotgun sequence - Vitis vinifera (Grape), partial (48%);Evalue=1E-173;%ident=99.4|MAPMANSTORE: weakly similar to UniRef100_A7QVP6 Cluster: Chromosom…	3.36415	2.48742	1.32247e-05	0.00987225
41680	35.2	not assigned.unknown	|MERCATOR: (original description: no original description)||TAGI: TC372522;similar to UniRef100_A5NLP4 Cluster: LigA; n=1; Methylobacterium sp. 4-46;Rep: LigA - Methylobacterium sp. 4-46, partial (4%);Evalue=0;%ident=100|MAPMANSTORE: similar to UniRef100_A5NLP4 Cluster: LigA; n=1; Methylobacterium sp. 4-46;Rep: LigA - Methylobacterium sp. 4-46, partial (4%)||BREAD.WHEAT.TIGR: TA70970_4565; TA7097…	-9.93043	4.29618	3.83569e-09	0.000115471
41708	35.2	not assigned.unknown	|MERCATOR: (original description: no original description)||TAGI: TC396593;weakly similar to UniRef100_Q5B636 Cluster: Predicted protein; n=1; Emericella nidulans;Rep: Predicted protein - Emericella nidulans (Aspergillus nidulans), partial (6%);Evalue=0;%ident=98.53|MAPMANSTORE: weakly similar to UniRef100_Q5B636 Cluster: Predicted protein; n=1; Emericella nidulans;Rep: Predicted protein - Emeric…	-9.73726	2.14472	3.47047e-05	0.0146003
41756	35.2	not assigned.unknown	|MERCATOR: (original description: no original description)||TAGI: TC380986;;Evalue=2E-180;%ident=100|MAPMANSTORE: 0||DURUM.WHEAT.TIGR: BE429133; BE429133; Evalue=4E-53; %ident=88.24||BREAD.WHEAT.TIGR: TA75212_4565; TA75212_4565; Evalue=2E-180; %ident=100|	-7.90542	-0.26166	2.23666e-05	0.0125511
42043	35.2	not assigned.unknown	|MERCATOR: (original description: no original description)|	4.82674	-1.53461	2.31563e-05	0.0126747
42098	35.2	not assigned.unknown	|MERCATOR: (original description: no original description)||TAGI: CV522343;similar to UniRef100_Q8V0K2 Cluster: Glycoprotein gp2; n=1; Equid herpesvirus 4;Rep: Glycoprotein gp2 - Equid herpesvirus 4 (Equine herpesvirus 4), partial (9%);Evalue=3E-163;%ident=99.37|MAPMANSTORE: similar to UniRef100_Q8V0K2 Cluster: Glycoprotein gp2; n=1; Equid herpesvirus 4;Rep: Glycoprotein gp2 - Equid herpesvirus 4…	2.15473	0.192204	3.53291e-05	0.0146003
42274	35.2	not assigned.unknown	|MERCATOR: (loc_os01g61670.3 : 58.9) no description available & (gnl|cdd|36433 : 54.7) no description available & (at2g35820 : 47.8) ureidoglycolate hydrolases; FUNCTIONS IN: ureidoglycolate hydrolase activity; INVOLVED IN: allantoin catabolic process; LOCATED IN: cellular_component unknown; EXPRESSED IN: 17 plant structures; EXPRESSED DURING: 13 growth stages; CONTAINS InterPro DOMAIN/s: Ureidog…	-7.4725	-0.702038	3.7566e-05	0.0150787
42318	35.2	not assigned.unknown	|MERCATOR: (original description: no original description)||TAGI: TC446232;weakly similar to UniRef100_Q064P2 Cluster: Polysaccharide export outer membrane protein; n=1; Synechococcus sp. BL107;Rep: Polysaccharide export outer membrane protein - Synechococcus sp. BL107, partial (5%);Evalue=0;%ident=98.78|MAPMANSTORE: weakly similar to UniRef100_Q064P2 Cluster: Polysaccharide export outer membrane…	-9.15586	0.879706	0.000244226	0.0336097
42492	35.2	not assigned.unknown	|MERCATOR: (original description: no original description)|	3.06123	-1.04244	0.000369687	0.0405437
42545	35.2	not assigned.unknown	|MERCATOR: (original description: no original description)|	-9.12228	-0.854197	0.000575274	0.0482405
42654	35.2	not assigned.unknown	|MERCATOR: (loc_os01g64870.1 : 88.6) no description available & (gnl|cdd|36139 : 60.3) no description available & (gnl|cdd|34516 : 43.9) no description available & (at1g71240 : 41.2) Plant protein of unknown function (DUF639); FUNCTIONS IN: molecular_function unknown; INVOLVED IN: biological_process unknown; LOCATED IN: cellular_component unknown; CONTAINS InterPro DOMAIN/s: Protein of unknown fu…	8.79699	-0.849924	6.38056e-05	0.0205526
42891	35.2	not assigned.unknown	|MERCATOR: (original description: no original description)||TAGI: TC431115;similar to UniRef100_Q2IK45 Cluster: Type IV secretory pathway VirJ component precursor; n=1; Anaeromyxobacter dehalogenans 2CP-C;Rep: Type IV secretory pathway VirJ component precursor - Anaeromyxobacter dehalogenans (strain 2CP-C), partial (4%);Evalue=1E-81;%ident=92.86|MAPMANSTORE: similar to UniRef100_Q2IK45 Cluster: T…	-7.96694	-1.71619	8.97395e-05	0.0236979
42979	35.2	not assigned.unknown	|MERCATOR: (original description: no original description)||TAGI: TC429138;;Evalue=0;%ident=98.54|MAPMANSTORE: 0||BREAD.WHEAT.TIGR: CJ544091; CJ544091; Evalue=3E-133; %ident=99.24|	-8.61446	-1.30301	2.24593e-06	0.00482946
42995	35.2	not assigned.unknown	|MERCATOR: (original description: no original description)||TAGI: TC389430;similar to UniRef100_Q0D632 Cluster: Os07g0515700 protein; n=1; Oryza sativa Japonica Group;Rep: Os07g0515700 protein - Oryza sativa subsp. japonica (Rice), partial (14%);Evalue=0;%ident=99.73|MAPMANSTORE: weakly similar to ( 131) loc_os07g33200 12007.m07581 protein expressed protein similar to UniRef100_Q0D632 Cluster: Os…	-8.12712	-0.117664	0.000560549	0.0477212
43057	35.2	not assigned.unknown	|MERCATOR: (original description: no original description)||TAGI: BE604691;;Evalue=0;%ident=100|MAPMANSTORE: 0||BREAD.WHEAT.TIGR: BE604691; BE604691; Evalue=0; %ident=100||RICE GENOME: Loc_Os09g39330.1 ; 12009.m06872 protein retrotransposon protein, putative, unclassified|	-10.8755	0.811631	2.43907e-05	0.0132301
43126	35.2	not assigned.unknown	|MERCATOR: (original description: no original description)|	-3.95733	-1.5687	0.000351095	0.0401
43150	35.2	not assigned.unknown	|MERCATOR: (original description: no original description)||TAGI: TC410776;;Evalue=0;%ident=99.43|MAPMANSTORE: 0||BREAD.WHEAT.TIGR: TA109189_4565; TA109189_4565; Evalue=0; %ident=99.43||BRACHYPODIUM GENOME: Bradi5g26390.1 ; no original description||RICE GENOME: Loc_Os03g06850.2 ; 12003.m101715 protein B3 DNA binding domain containing protein, expressed|	-9.22813	-0.774317	3.47191e-05	0.0146003
43439	35.2	not assigned.unknown	|MERCATOR: (original description: no original description)||TAGI: BF201090;similar to UniRef100_O81397 Cluster: CRP1; n=1; Zea mays;Rep: CRP1 - Zea mays (Maize), partial (10%);Evalue=5E-77;%ident=86.18|MAPMANSTORE: similar to UniRef100_O81397 Cluster: CRP1; n=1; Zea mays;Rep: CRP1 - Zea mays (Maize), partial (10%)||BREAD.WHEAT.TIGR: BF201090; BF201090; Evalue=7E-77; %ident=86.18||BRACHYPODIUM GEN…	3.34634	-0.617562	0.000287158	0.0363369
44111	35.2	not assigned.unknown	|MERCATOR: (original description: no original description)||TAGI: CJ928484;;Evalue=8E-81;%ident=100|MAPMANSTORE: 0|	-7.67796	-1.61582	0.000494826	0.0451904
44266	35.2	not assigned.unknown	|MERCATOR: (original description: no original description)||TAGI: CD880478;;Evalue=5E-170;%ident=99.4|MAPMANSTORE: 0||BREAD.WHEAT.TIGR: CD880478; CD880478; Evalue=6E-170; %ident=99.4|	4.41427	-0.368066	0.000306452	0.0375023
44587	35.2	not assigned.unknown	|MERCATOR: (original description: no original description)|	-10.3751	0.321663	0.00012072	0.0254141
44603	35.2	not assigned.unknown	|MERCATOR: (original description: no original description)|	4.77573	-1.15029	0.000565107	0.0478545
44630	35.2	not assigned.unknown	|MERCATOR: (original description: no original description)|	-8.9315	-1.02997	1.67839e-06	0.00404217
44778	35.2	not assigned.unknown	|MERCATOR: (original description: no original description)||TAGI: CK199140;;Evalue=4E-100;%ident=97.66|MAPMANSTORE: 0||BREAD.WHEAT.TIGR: CK199140; CK199140; Evalue=6E-100; %ident=97.66||BRACHYPODIUM GENOME: Bradi5g24095.1 ; weakly similar to ( 124) AT3G24255 | Symbols: | unknown protein | chr3:8788949-8793208 FORWARDmoderately similar to ( 328) loc_os01g47830 12001.m10976 protein retrotransposon …	-9.44143	1.25659	8.95239e-05	0.0236979
45064	35.2	not assigned.unknown	|MERCATOR: (original description: no original description)||TAGI: CJ685981;;Evalue=3E-33;%ident=82.35|MAPMANSTORE: 0||BREAD.WHEAT.TIGR: CJ685981; CJ685981; Evalue=4E-33; %ident=82.35|	-5.67743	-1.57984	0.000244499	0.0336097
45099	35.2	not assigned.unknown	|MERCATOR: no hits & (original description: no original description)||TAGI: BQ172224;similar to UniRef100_Q0DNN0 Cluster: Os03g0745400 protein; n=1; Oryza sativa Japonica Group;Rep: Os03g0745400 protein - Oryza sativa subsp. japonica (Rice), partial (11%);Evalue=3E-133;%ident=96.23|MAPMANSTORE: similar to UniRef100_Q0DNN0 Cluster: Os03g0745400 protein; n=1; Oryza sativa Japonica Group;Rep: Os03g0…	-8.74161	-1.21103	8.00693e-05	0.0233045
45163	35.2	not assigned.unknown	|MERCATOR: (original description: no original description)|	-3.85076	-1.98265	0.00049353	0.0451904
45389	35.2	not assigned.unknown	|MERCATOR: (original description: no original description)||TAGI: TC432035;;Evalue=2E-141;%ident=89.47|MAPMANSTORE: 0|	3.24402	-0.597284	0.000213094	0.03228
45589	35.2	not assigned.unknown	|MERCATOR: (loc_os05g13390.1 : 68.6) no description available & (at3g47850 : 57.8) unknown protein; FUNCTIONS IN: molecular_function unknown; INVOLVED IN: biological_process unknown; LOCATED IN: chloroplast; EXPRESSED IN: 23 plant structures; EXPRESSED DURING: 12 growth stages; Has 57 Blast hits to 57 proteins in 32 species: Archae - 0; Bacteria - 5; Metazoa - 12; Fungi - 4; Plants - 29; Viruses …	6.98009	-0.828428	0.000358745	0.0401
45876	35.2	not assigned.unknown	|MERCATOR: (original description: no original description)||TAGI: TC454415;similar to UniRef100_Q8RYX0 Cluster: Pentatricopeptide (PPR) repeat-containing protein-like; n=1; Oryza sativa Japonica Group;Rep: Pentatricopeptide (PPR) repeat-containing protein-like - Oryza sativa subsp. japonica (Rice), partial (6%);Evalue=2E-130;%ident=98.49|MAPMANSTORE: similar to UniRef100_Q8RYX0 Cluster: Pentatric…	5.29706	-0.636994	0.000152177	0.0277649
45968	35.2	not assigned.unknown	|MERCATOR: (original description: no original description)||TAGI: CK215813;similar to UniRef100_Q5KFX4 Cluster: Pre-mRNA-splicing factor CWC22; n=1; Filobasidiella neoformans;Rep: Pre-mRNA-splicing factor CWC22 - Cryptococcus neoformans (Filobasidiella neoformans), partial (3%);Evalue=3E-122;%ident=100|MAPMANSTORE: similar to UniRef100_Q5KFX4 Cluster: Pre-mRNA-splicing factor CWC22; n=1; Filobasi…	5.16944	-1.87556	0.00025015	0.0341582
46004	35.2	not assigned.unknown	|MERCATOR: (original description: no original description)||TAGI: TC441339;weakly similar to UniRef100_Q07UA8 Cluster: OmpA/MotB domain protein precursor; n=1; Rhodopseudomonas palustris BisA53;Rep: OmpA/MotB domain protein precursor - Rhodopseudomonas palustris (strain BisA53), partial (8%);Evalue=1E-142;%ident=94.05|MAPMANSTORE: weakly similar to UniRef100_Q07UA8 Cluster: OmpA/MotB domain prote…	4.7099	-0.478895	0.000445742	0.0433439
46160	35.2	not assigned.unknown	|MERCATOR: (original description: no original description)||TAGI: TC454007;;Evalue=6E-122;%ident=99.59|MAPMANSTORE: 0||BREAD.WHEAT.TIGR: TA103782_4565; TA103782_4565; Evalue=8E-122; %ident=99.59|	-9.83124	-0.177492	5.41927e-05	0.0190812
46181	35.2	not assigned.unknown	|MERCATOR: (original description: no original description)||TAGI: CD939280;;Evalue=2E-103;%ident=99.52|MAPMANSTORE: 0||BREAD.WHEAT.TIGR: TA88107_4565; TA88107_4565; Evalue=2E-103; %ident=99.52|	-5.05244	-0.982128	0.000124482	0.0257943
46327	35.2	not assigned.unknown	|MERCATOR: (original description: no original description)||TAGI: TC452033;similar to UniRef100_Q6Q502 Cluster: Homeodomain leucine zipper protein 16; n=1; Oryza sativa Japonica Group;Rep: Homeodomain leucine zipper protein 16 - Oryza sativa subsp. japonica (Rice), partial (7%);Evalue=1E-139;%ident=83.08|MAPMANSTORE: similar to UniRef100_Q6Q502 Cluster: Homeodomain leucine zipper protein 16; n=1;…	-7.86033	-0.327793	4.07969e-05	0.0159503
46594	35.2	not assigned.unknown	|MERCATOR: (original description: no original description)|	9.94757	3.38009	0.00050955	0.0455385
46704	35.2	not assigned.unknown	|MERCATOR: (original description: no original description)||TAGI: TC397280;;Evalue=4E-177;%ident=99.71|MAPMANSTORE: 0||BRACHYPODIUM GENOME: Bradi1g36027.1 ; highly similar to ( 930) AT5G12950 | Symbols: | catalytic | chr5:4093117-4096806 FORWARDnearly identical (1212) loc_os06g41020 12006.m08637 protein expressed proteinDUF1680 COG3533 no original description||RICE GENOME: Loc_Os06g41020.1 ; 1200…	-6.67003	-0.870998	0.000422937	0.0430371
46997	35.2	not assigned.unknown	|MERCATOR: (original description: no original description)|	-3.07843	-1.6027	0.000485176	0.045047
47023	35.2	not assigned.unknown	|MERCATOR: (original description: no original description)||TAGI: TC437031;;Evalue=0;%ident=100|MAPMANSTORE: 0||BREAD.WHEAT.TIGR: TA91527_4565; TA91527_4565; Evalue=0; %ident=99.76|	-8.62623	0.451644	0.000278958	0.0356757
47186	35.2	not assigned.unknown	|MERCATOR: (original description: no original description)||BRACHYPODIUM GENOME: Bradi3g21852.2 ; moderately similar to ( 462) AT5G16180 | Symbols: CRS1, ATCRS1 | CRS1 (ARABIDOPSIS ORTHOLOG OF MAIZE CHLOROPLAST SPLICING FACTOR CRS1); RNA splicing factor, transesterification mechanism | chr5:5279884-5282898 FORWARDhighly similar to ( 856) loc_os08g27150 12008.m06728 protein CRS1, putative, express…	5.32361	-0.963092	0.000374798	0.0409235
47210	35.2	not assigned.unknown	|MERCATOR: (original description: no original description)|	-8.95913	-1.01804	0.000536551	0.0469384
47348	35.2	not assigned.unknown	|MERCATOR: (original description: no original description)||TAGI: TC426270;similar to UniRef100_Q53NY5 Cluster: Expressed protein; n=1; Oryza sativa Japonica Group;Rep: Expressed protein - Oryza sativa subsp. japonica (Rice), partial (41%);Evalue=9E-97;%ident=95.13|MAPMANSTORE: weakly similar to ( 138) AT2G31560 ; Symbols: ; unknown protein ; chr2:13436611-13437312 FORWARDweakly similar to ( 145)…	7.91212	-1.29509	0.000171406	0.0294607
47418	35.2	not assigned.unknown	|MERCATOR: (original description: no original description)||TAGI: TC382156;similar to UniRef100_Q68VB5 Cluster: ALY protein; n=1; Nicotiana benthamiana;Rep: ALY protein - Nicotiana benthamiana, partial (5%);Evalue=0;%ident=98.26|MAPMANSTORE: similar to UniRef100_Q68VB5 Cluster: ALY protein; n=1; Nicotiana benthamiana;Rep: ALY protein - Nicotiana benthamiana, partial (5%)|	-9.00308	-0.879788	1.87284e-05	0.0111646
47545	35.2	not assigned.unknown	|MERCATOR: (loc_os06g41020.1 : 78.2) no description available & (at5g12950 : 68.6) FUNCTIONS IN: catalytic activity; LOCATED IN: vacuole, plant-type cell wall; EXPRESSED IN: stem, male gametophyte, guard cell, pollen tube; EXPRESSED DURING: L mature pollen stage, M germinated pollen stage; CONTAINS InterPro DOMAIN/s: Protein of unknown function DUF1680 (InterPro:IPR012878), Six-hairpin glycosidas…	5.55504	-0.932013	0.000510977	0.0455454
47672	35.2	not assigned.unknown	|MERCATOR: (original description: no original description)||TAGI: TC458229;similar to UniRef100_Q7QEL7 Cluster: AGAP000049-PA; n=1; Anopheles gambiae str. PEST;Rep: AGAP000049-PA - Anopheles gambiae str. PEST, partial (8%);Evalue=5E-176;%ident=99.13|MAPMANSTORE: similar to UniRef100_Q7QEL7 Cluster: AGAP000049-PA; n=1; Anopheles gambiae str. PEST;Rep: AGAP000049-PA - Anopheles gambiae str. PEST, p…	3.80324	0.524796	0.000472507	0.0445214
48043	35.2	not assigned.unknown	|MERCATOR: (original description: no original description)|	-10.4743	0.41421	0.000103291	0.0241662
48044	35.2	not assigned.unknown	|MERCATOR: (loc_os08g13320.1 : 152.0) no description available & (at1g16840 : 68.9) unknown protein; BEST Arabidopsis thaliana protein match is: unknown protein (TAIR:AT1G78890.1); Has 35333 Blast hits to 34131 proteins in 2444 species: Archae - 798; Bacteria - 22429; Metazoa - 974; Fungi - 991; Plants - 531; Viruses - 0; Other Eukaryotes - 9610 (source: NCBI BLink). & (gnl|cdd|36139 : 53.4) no d…	4.9832	-1.27512	0.00043388	0.0430371
48069	35.2	not assigned.unknown	|MERCATOR: (original description: no original description)||TAGI: TC422377;;Evalue=0;%ident=100|MAPMANSTORE: 0||BREAD.WHEAT.TIGR: TA79811_4565; TA79811_4565; Evalue=0; %ident=99.75|	-10.9828	0.917348	3.94157e-05	0.0157164
48179	35.2	not assigned.unknown	|MERCATOR: (original description: no original description)||TAGI: TC451345;;Evalue=0;%ident=98.88|MAPMANSTORE: 0||BREAD.WHEAT.TIGR: CD886524; CD886524; Evalue=0; %ident=99.55||BRACHYPODIUM GENOME: Bradi2g59590.1 ; no original description||RICE GENOME: Loc_Os09g04430.1 ; 12009.m03812 protein hypothetical protein|	3.71751	-1.19536	0.000323981	0.0387035
48217	35.2	not assigned.unknown	|MERCATOR: (original description: no original description)||TAGI: TC422501;;Evalue=0;%ident=98.93|MAPMANSTORE: 0||BREAD.WHEAT.TIGR: CV762353; CV762353; Evalue=0; %ident=98.96|	-9.05726	-0.929739	0.000463344	0.043864
48334	35.2	not assigned.unknown	|MERCATOR: (original description: no original description)|	10.8915	0.958356	0.000112681	0.0249426
48393	35.2	not assigned.unknown	|MERCATOR: (original description: no original description)||TAGI: CV780849;homologue to UniRef100_Q7XYD1 Cluster: Geranylgeranylated protein ATGP1; n=1; Triticum aestivum;Rep: Geranylgeranylated protein ATGP1 - Triticum aestivum (Wheat), partial (23%);Evalue=0.0000000001;%ident=100|MAPMANSTORE: homologue to UniRef100_Q7XYD1 Cluster: Geranylgeranylated protein ATGP1; n=1; Triticum aestivum;Rep: Ge…	-3.11503	0.317529	0.000424879	0.0430371
48417	35.2	not assigned.unknown	|MERCATOR: (original description: no original description)|	-3.25855	-0.385225	0.000227655	0.0331534
48444	35.2	not assigned.unknown	|MERCATOR: (original description: no original description)||TAGI: TC456744;UniRef100_Q06804 Cluster: PZE40 protein; n=1; Hordeum vulgare;Rep: PZE40 protein - Hordeum vulgare (Barley), partial (14%);Evalue=4E-171;%ident=100|MAPMANSTORE: UniRef100_Q06804 Cluster: PZE40 protein; n=1; Hordeum vulgare;Rep: PZE40 protein - Hordeum vulgare (Barley), partial (14%)||BREAD.WHEAT.TIGR: TA88030_4565; TA88030…	-7.73236	-0.44506	2.49309e-06	0.00517608
48919	35.2	not assigned.unknown	|MERCATOR: (original description: no original description)||TAGI: TC404411;similar to UniRef100_Q0IPM3 Cluster: Os12g0182800 protein; n=1; Oryza sativa Japonica Group;Rep: Os12g0182800 protein - Oryza sativa subsp. japonica (Rice), partial (15%);Evalue=1E-114;%ident=100|MAPMANSTORE: similar to UniRef100_Q0IPM3 Cluster: Os12g0182800 protein; n=1; Oryza sativa Japonica Group;Rep: Os12g0182800 prote…	-7.93238	-0.247021	3.83588e-06	0.00607775
49026	35.2	not assigned.unknown	|MERCATOR: (original description: no original description)||TAGI: TC407333;;Evalue=0;%ident=99.38|MAPMANSTORE: 0||BREAD.WHEAT.TIGR: TA78745_4565; TA78745_4565; Evalue=0; %ident=99.38|	-9.07639	-0.912378	9.45568e-05	0.0240218
49028	35.2	not assigned.unknown	|MERCATOR: no hits & (original description: no original description)|	-2.92995	-0.611953	0.000507326	0.0454548
49243	35.2	not assigned.unknown	|MERCATOR: (original description: no original description)||TAGI: CD882871;;Evalue=3E-163;%ident=99.68|MAPMANSTORE: 0||BREAD.WHEAT.TIGR: CD882871; CD882871; Evalue=4E-163; %ident=99.68|	-9.29305	-0.714327	0.000334928	0.039315
49381	35.2	not assigned.unknown	|MERCATOR: (original description: no original description)||TAGI: CD919238;;Evalue=0.000000000000008;%ident=92.98|MAPMANSTORE: 0||BREAD.WHEAT.TIGR: CD919238; CD919238; Evalue=0.00000000000001; %ident=92.98|	6.90677	-1.86936	0.000208208	0.0318982
49454	35.2	not assigned.unknown	|MERCATOR: no hits & (original description: no original description)||TAGI: CA500510;;Evalue=1E-131;%ident=100|MAPMANSTORE: 0||BREAD.WHEAT.TIGR: TA100707_4565; TA100707_4565; Evalue=2E-131; %ident=100|	-5.7271	-1.48517	0.000430908	0.0430371
49498	35.2	not assigned.unknown	|MERCATOR: (loc_os05g43950.1 : 142.0) no description available & (at1g28520 : 100.0) vascular plant one zinc finger protein (VOZ1); FUNCTIONS IN: transcription activator activity; INVOLVED IN: biological_process unknown; LOCATED IN: cellular_component unknown; EXPRESSED IN: 22 plant structures; EXPRESSED DURING: 8 growth stages; BEST Arabidopsis thaliana protein match is: vascular plant one zinc …	4.71075	-1.0688	0.000189819	0.0308887
49771	35.2	not assigned.unknown	|MERCATOR: no hits & (original description: no original description)|	-2.53957	-0.301035	0.000357173	0.0401
49838	35.2	not assigned.unknown	|MERCATOR: (original description: no original description)||TAGI: TC401261;homologue to UniRef100_Q84L52 Cluster: Metallothionein-like protein type 3; n=1; Hordeum vulgare subsp. vulgare;Rep: Metallothionein-like protein type 3 - Hordeum vulgare var. distichum (Two-rowed barley), complete;Evalue=0;%ident=100|MAPMANSTORE: homologue to UniRef100_Q84L52 Cluster: Metallothionein-like protein type 3; …	-3.89915	3.04951	0.000173214	0.0294607
50051	35.2	not assigned.unknown	|MERCATOR: (original description: no original description)||TAGI: CV762509;;Evalue=5E-85;%ident=91.63|MAPMANSTORE: 0||BREAD.WHEAT.TIGR: CV762509; CV762509; Evalue=6E-85; %ident=91.63|	6.94019	-2.07796	1.72311e-05	0.0110369
50404	35.2	not assigned.unknown	|MERCATOR: (original description: no original description)||TAGI: TC386228;similar to UniRef100_A8M6W9 Cluster: Methyltransferase type 12; n=1; Salinispora arenicola CNS-205;Rep: Methyltransferase type 12 - Salinispora arenicola CNS-205, partial (7%);Evalue=0;%ident=96.86|MAPMANSTORE: weakly similar to ( 167) loc_os03g06750 12003.m06192 protein expressed protein similar to UniRef100_A8M6W9 Cluste…	-3.71878	-0.286819	0.000141379	0.0271092
50623	35.2	not assigned.unknown	|MERCATOR: (original description: no original description)||TAGI: TC381336;weakly similar to UniRef100_Q1LNU1 Cluster: GMC oxidoreductase; n=1; Ralstonia metallidurans CH34;Rep: GMC oxidoreductase - Ralstonia metallidurans (strain CH34 / ATCC 43123 / DSM 2839), partial (10%);Evalue=1E-178;%ident=93.96|MAPMANSTORE: weakly similar to UniRef100_Q1LNU1 Cluster: GMC oxidoreductase; n=1; Ralstonia meta…	-9.55734	-0.4624	0.00023653	0.0331778
50649	35.2	not assigned.unknown	|MERCATOR: (original description: no original description)|	-10.1443	0.122915	4.38321e-05	0.0167604
50657	35.2	not assigned.unknown	|MERCATOR: (original description: no original description)||TAGI: TC400920;UniRef100_Q76PT8 Cluster: D5L protein; n=2; Variola virus;Rep: D5L protein - Variola minor virus, partial (19%);Evalue=0;%ident=100|MAPMANSTORE: UniRef100_Q76PT8 Cluster: D5L protein; n=2; Variola virus;Rep: D5L protein - Variola minor virus, partial (19%)||BREAD.WHEAT.TIGR: TA101901_4565; TA101901_4565; Evalue=0; %ident=1…	-5.59702	1.40945	0.000319246	0.0383663
50854	35.2	not assigned.unknown	|MERCATOR: (original description: no original description)||TAGI: CK161898;UniRef100_A2AGW3 Cluster: Protocadherin 19; n=1; Mus musculus;Rep: Protocadherin 19 - Mus musculus (Mouse), partial (0%);Evalue=0;%ident=93.78|MAPMANSTORE: UniRef100_A2AGW3 Cluster: Protocadherin 19; n=1; Mus musculus;Rep: Protocadherin 19 - Mus musculus (Mouse), partial (0%)||BREAD.WHEAT.TIGR: CK161898; CK161898; Evalue=0…	-9.35611	-0.648747	0.000318213	0.0383186
51190	35.2	not assigned.unknown	|MERCATOR: (original description: no original description)||TAGI: TC428358;;Evalue=7E-169;%ident=99.69|MAPMANSTORE: 0||BREAD.WHEAT.TIGR: CA733636; CA733636; Evalue=2E-170; %ident=100|	-9.98214	-0.0116435	0.000300448	0.0370448
51735	35.2	not assigned.unknown	|MERCATOR: (original description: no original description)|	9.78648	-0.0320645	0.000180728	0.0299765
52027	35.2	not assigned.unknown	|MERCATOR: (original description: no original description)||TAGI: CK209523;homologue to UniRef100_A5IEA8 Cluster: Glutamate racemase; n=1; Legionella pneumophila str. Corby;Rep: Glutamate racemase -, partial (4%);Evalue=0;%ident=97|MAPMANSTORE: homologue to UniRef100_A5IEA8 Cluster: Glutamate racemase; n=1; Legionella pneumophila str. Corby;Rep: Glutamate racemase -, partial (4%)||BREAD.WHEAT.TIG…	-2.38841	2.85718	0.000353211	0.0401
52028	35.2	not assigned.unknown	|MERCATOR: (original description: no original description)||TAGI: CD861985;;Evalue=9E-23;%ident=98.36|MAPMANSTORE: 0||BREAD.WHEAT.TIGR: CD861985; CD861985; Evalue=1E-22; %ident=98.36|	-9.22711	-0.775004	0.000365488	0.0403773
52309	35.2	not assigned.unknown	|MERCATOR: (original description: no original description)||TAGI: TC400227;weakly similar to UniRef100_A0ZBP7 Cluster: Ribonuclease III; n=1; Nodularia spumigena CCY 9414;Rep: Ribonuclease III - Nodularia spumigena CCY 9414, partial (11%);Evalue=0;%ident=100|MAPMANSTORE: weakly similar to UniRef100_A0ZBP7 Cluster: Ribonuclease III; n=1; Nodularia spumigena CCY 9414;Rep: Ribonuclease III - Nodular…	-9.4111	2.49011	0.000135141	0.0264392
52356	35.2	not assigned.unknown	|MERCATOR: (original description: no original description)||TAGI: TC413323;similar to UniRef100_A2TLI0 Cluster: Histidine kinase; n=1; Hordeum vulgare subsp. vulgare;Rep: Histidine kinase - Hordeum vulgare var. distichum (Two-rowed barley), partial (5%);Evalue=0;%ident=99.41|MAPMANSTORE: similar to UniRef100_A2TLI0 Cluster: Histidine kinase; n=1; Hordeum vulgare subsp. vulgare;Rep: Histidine kina…	-4.28511	2.16001	0.000102736	0.0241662
52489	35.2	not assigned.unknown	|MERCATOR: (original description: no original description)||TAGI: TC427798;weakly similar to UniRef100_Q9LD31 Cluster: Dip1-associated protein C; n=1; Crypthecodinium cohnii;Rep: Dip1-associated protein C - Crypthecodinium cohnii (Dinoflagellate), partial (6%);Evalue=0;%ident=98.75|MAPMANSTORE: weakly similar to UniRef100_Q9LD31 Cluster: Dip1-associated protein C; n=1; Crypthecodinium cohnii;Rep:…	2.3684	1.05357	7.25234e-05	0.0220533
52588	35.2	not assigned.unknown	|MERCATOR: (original description: no original description)||TAGI: CD863751;;Evalue=3E-168;%ident=99.69|MAPMANSTORE: 0||BREAD.WHEAT.TIGR: CD863751; CD863751; Evalue=4E-168; %ident=99.69|	-4.35197	0.401168	0.000285138	0.0362191
53055	35.2	not assigned.unknown	|MERCATOR: (original description: no original description)|	-2.71017	4.15012	0.000550404	0.0477212
53056	35.2	not assigned.unknown	|MERCATOR: (original description: no original description)||TAGI: TC415995;weakly similar to UniRef100_Q6CCA1 Cluster: Similarity; n=1; Yarrowia lipolytica;Rep: Similarity - Yarrowia lipolytica (Candida lipolytica), partial (5%);Evalue=4E-139;%ident=99.63|MAPMANSTORE: weakly similar to UniRef100_Q6CCA1 Cluster: Similarity; n=1; Yarrowia lipolytica;Rep: Similarity - Yarrowia lipolytica (Candida li…	-10.0379	-0.0100844	0.000149315	0.0276796
53346	35.2	not assigned.unknown	|MERCATOR: (original description: no original description)||TAGI: TC427463;similar to UniRef100_Q9FRX0 Cluster: Bundle sheath cell specific protein 1; n=1; Zea mays;Rep: Bundle sheath cell specific protein 1 - Zea mays (Maize), partial (20%);Evalue=4E-110;%ident=98.66|MAPMANSTORE: similar to UniRef100_Q9FRX0 Cluster: Bundle sheath cell specific protein 1; n=1; Zea mays;Rep: Bundle sheath cell spe…	-3.13523	3.74333	5.77247e-05	0.0197474
53358	35.2	not assigned.unknown	|MERCATOR: (original description: no original description)||TAGI: TC377263;similar to UniRef100_Q3B807-2 Cluster: Isoform 2 of Q3B807 ; n=1; Mus musculus;Rep: Isoform 2 of Q3B807 - Mus musculus (Mouse), partial (5%);Evalue=0;%ident=99.49|MAPMANSTORE: similar to UniRef100_Q3B807-2 Cluster: Isoform 2 of Q3B807 ; n=1; Mus musculus;Rep: Isoform 2 of Q3B807 - Mus musculus (Mouse), partial (5%)||BREAD.…	-9.58394	-0.443057	0.000236949	0.0331778
53830	35.2	not assigned.unknown	|MERCATOR: (original description: no original description)||TAGI: TC426051;;Evalue=0;%ident=96.14|MAPMANSTORE: very weakly similar to (92.8) loc_os01g06070 12001.m07238 protein conserved hypothetical protein||BREAD.WHEAT.TIGR: BQ161783; Hypothetical protein P0030H07.35 [Oryza sativa (japonica cultivar-group)]; Evalue=0; %ident=95.78||BRACHYPODIUM GENOME: Bradi2g00470.1 ; weakly similar to ( 195) …	-2.79315	2.53656	0.000151399	0.0277068
54040	35.2	not assigned.unknown	|MERCATOR: (original description: no original description)||TAGI: CV771594;weakly similar to UniRef100_Q9SBM1 Cluster: Hydroxyproline-rich glycoprotein DZ-HRGP precursor; n=1; Volvox carteri f. nagariensis;Rep: Hydroxyproline-rich glycoprotein DZ-HRGP precursor - Volvox carteri f. nagariensis, partial (7%);Evalue=1E-136;%ident=99.62|MAPMANSTORE: weakly similar to UniRef100_Q9SBM1 Cluster: Hydroxy…	3.05399	-0.119268	0.000132345	0.0261259
54697	35.2	not assigned.unknown	|MERCATOR: (original description: no original description)||TAGI: TC388213;weakly similar to UniRef100_Q0IV94 Cluster: Os11g0104200 protein; n=1; Oryza sativa Japonica Group;Rep: Os11g0104200 protein - Oryza sativa subsp. japonica (Rice), partial (16%);Evalue=0;%ident=99.85|MAPMANSTORE: moderately similar to ( 239) loc_os10g34614 12010.m21926 protein csAtPR5, putative, expressed weakly similar to…	-5.25395	-0.248463	0.00050693	0.0454548
55076	35.2	not assigned.unknown	|MERCATOR: (loc_os02g08320.1 : 210.0) no description available & (at2g24150 : 147.0) heptahelical transmembrane protein HHP3; heptahelical protein 3 (HHP3); FUNCTIONS IN: receptor activity; INVOLVED IN: response to oxidative stress, response to hormone stimulus, response to sucrose stimulus; LOCATED IN: integral to membrane; EXPRESSED IN: 23 plant structures; EXPRESSED DURING: 13 growth stages; C…	2.93366	0.311335	0.000272186	0.0353954
55105	35.2	not assigned.unknown	|MERCATOR: (loc_os01g63050.1 : 127.0) no description available & (gnl|cdd|36433 : 50.0) no description available & (at5g59050 : 45.8) unknown protein; Has 35333 Blast hits to 34131 proteins in 2444 species: Archae - 798; Bacteria - 22429; Metazoa - 974; Fungi - 991; Plants - 531; Viruses - 0; Other Eukaryotes - 9610 (source: NCBI BLink). & (reliability: 91.6) & (original description: no original …	2.64698	0.913296	2.9461e-05	0.0138456
55409	35.2	not assigned.unknown	|MERCATOR: (original description: no original description)||TAGI: TC401331;similar to UniRef100_A7PLT2 Cluster: Chromosome chr14 scaffold_21, whole genome shotgun sequence; n=1; Vitis vinifera;Rep: Chromosome chr14 scaffold_21, whole genome shotgun sequence - Vitis vinifera (Grape), partial (5%);Evalue=0;%ident=99.8|MAPMANSTORE: similar to UniRef100_A7PLT2 Cluster: Chromosome chr14 scaffold_21, w…	-9.43121	-0.573513	0.000253863	0.0343234
55904	35.2	not assigned.unknown	|MERCATOR: (original description: no original description)|	5.01705	2.96324	7.48222e-06	0.00834254
55919	35.2	not assigned.unknown	|MERCATOR: (original description: no original description)||TAGI: TC376557;similar to UniRef100_Q9YHD0 Cluster: Otx; n=1; Petromyzon marinus;Rep: Otx - Petromyzon marinus (Sea lamprey), partial (5%);Evalue=0;%ident=92.68|MAPMANSTORE: similar to UniRef100_Q9YHD0 Cluster: Otx; n=1; Petromyzon marinus;Rep: Otx - Petromyzon marinus (Sea lamprey), partial (5%)||DURUM.WHEAT.TIGR: BF293074; BF293074; Ev…	-9.36385	4.21491	6.58921e-08	0.000661217
56020	35.2	not assigned.unknown	|MERCATOR: (original description: no original description)||TAGI: CV762988;UniRef100_A7GTD0 Cluster: Rod shape-determining protein MreD precursor; n=1; Bacillus cereus subsp. cytotoxis NVH 391-98;Rep: Rod shape-determining protein MreD precursor - Bacillus cereus subsp. cytotoxis (strain NVH 391-98), partial (8%);Evalue=0;%ident=98.83|MAPMANSTORE: UniRef100_A7GTD0 Cluster: Rod shape-determining p…	-9.22616	2.62945	4.57423e-05	0.0172131
56027	35.2	not assigned.unknown	|MERCATOR: (original description: no original description)||TAGI: TC433728;similar to UniRef100_A7PJA1 Cluster: Chromosome chr12 scaffold_18, whole genome shotgun sequence; n=1; Vitis vinifera;Rep: Chromosome chr12 scaffold_18, whole genome shotgun sequence - Vitis vinifera (Grape), partial (8%);Evalue=0;%ident=99.57|MAPMANSTORE: similar to UniRef100_A7PJA1 Cluster: Chromosome chr12 scaffold_18, …	-7.97971	1.47013	0.000354291	0.0401
56044	35.2	not assigned.unknown	|MERCATOR: (original description: no original description)||TAGI: TC410534;;Evalue=0;%ident=98.73|MAPMANSTORE: 0||BREAD.WHEAT.TIGR: TA80893_4565; TA80893_4565; Evalue=0; %ident=98.73|	-9.97397	-0.0673315	0.000153929	0.0279997
56307	35.2	not assigned.unknown	|MERCATOR: (original description: no original description)|	11.1422	1.19136	9.86524e-05	0.0241662
56787	35.2	not assigned.unknown	|MERCATOR: (loc_os12g38640.1 : 103.0) no description available & (at5g08050 : 73.6) FUNCTIONS IN: molecular_function unknown; INVOLVED IN: response to karrikin; LOCATED IN: thylakoid, chloroplast thylakoid membrane, chloroplast; EXPRESSED IN: 21 plant structures; EXPRESSED DURING: 13 growth stages; CONTAINS InterPro DOMAIN/s: Protein of unknown function DUF1118 (InterPro:IPR009500), Uncharacteris…	4.1312	2.95869	1.78851e-05	0.0111069
56812	35.2	not assigned.unknown	|MERCATOR: (original description: no original description)|	-9.77622	1.49796	8.05086e-05	0.0233045
56840	35.2	not assigned.unknown	|MERCATOR: (original description: no original description)||TAGI: TC425016;homologue to UniRef100_Q6CYV3 Cluster: Small heat shock protein ibpB; n=1; Pectobacterium atrosepticum;Rep: Small heat shock protein ibpB - Erwinia carotovora subsp. atroseptica (Pectobacterium atrosepticum), partial (8%);Evalue=0;%ident=94.94|MAPMANSTORE: homologue to UniRef100_Q6CYV3 Cluster: Small heat shock protein ibp…	-2.89235	3.37291	6.69054e-05	0.0205526
57451	35.2	not assigned.unknown	|MERCATOR: (original description: no original description)||TAGI: TC402126;similar to UniRef100_Q0IWT3 Cluster: Os10g0489500 protein; n=1; Oryza sativa Japonica Group;Rep: Os10g0489500 protein - Oryza sativa subsp. japonica (Rice), partial (4%);Evalue=0;%ident=100|MAPMANSTORE: similar to UniRef100_Q0IWT3 Cluster: Os10g0489500 protein; n=1; Oryza sativa Japonica Group;Rep: Os10g0489500 protein - O…	-10.1533	0.109273	0.000119063	0.0254141
57608	35.2	not assigned.unknown	|MERCATOR: (original description: no original description)||TAGI: TC400049;weakly similar to UniRef100_Q2B5Z6 Cluster: High-affinity zinc uptake system membrane protein znuB; n=1; Bacillus sp. NRRL B-14911;Rep: High-affinity zinc uptake system membrane protein znuB - Bacillus sp. NRRL B-14911, partial (7%);Evalue=0;%ident=99.21|MAPMANSTORE: weakly similar to UniRef100_Q2B5Z6 Cluster: High-affinit…	-8.17515	0.0125165	0.000409781	0.042856
57641	35.2	not assigned.unknown	|MERCATOR: (original description: no original description)||TAGI: TC371021;weakly similar to UniRef100_Q109I2 Cluster: Expressed protein; n=1; Oryza sativa Japonica Group;Rep: Expressed protein - Oryza sativa subsp. japonica (Rice), partial (25%);Evalue=0;%ident=96.46|MAPMANSTORE: weakly similar to ( 145) loc_os10g34614 12010.m21926 protein csAtPR5, putative, expressed weakly similar to UniRef100…	-8.03604	1.44757	0.00032961	0.0390367
58046	35.2	not assigned.unknown	|MERCATOR: (original description: no original description)||TAGI: CJ533988;similar to UniRef100_O48612 Cluster: Ribosomal like-protein; n=1; Hordeum vulgare;Rep: Ribosomal like-protein - Hordeum vulgare (Barley), partial (24%);Evalue=0;%ident=97.17|MAPMANSTORE: similar to UniRef100_O48612 Cluster: Ribosomal like-protein; n=1; Hordeum vulgare;Rep: Ribosomal like-protein - Hordeum vulgare (Barley),…	-3.17322	0.768742	0.000441426	0.0432863
58394	35.2	not assigned.unknown	|MERCATOR: (original description: no original description)||TAGI: TC396468;similar to UniRef100_A7PBP1 Cluster: Chromosome chr16 scaffold_10, whole genome shotgun sequence; n=1; Vitis vinifera;Rep: Chromosome chr16 scaffold_10, whole genome shotgun sequence - Vitis vinifera (Grape), partial (26%);Evalue=0;%ident=99.49|MAPMANSTORE: similar to UniRef100_A7PBP1 Cluster: Chromosome chr16 scaffold_10,…	5.74081	1.43081	1.6245e-06	0.00404217
58481	35.2	not assigned.unknown	|MERCATOR: (original description: no original description)||TAGI: CA729069;;Evalue=1E-172;%ident=99.7|MAPMANSTORE: 0||BREAD.WHEAT.TIGR: CA729069; CA729069; Evalue=1E-172; %ident=99.7|	2.73768	0.373034	0.00013943	0.0269069
58829	35.2	not assigned.unknown	|MERCATOR: (original description: no original description)||TAGI: TC377419;similar to UniRef100_Q6RUQ6 Cluster: S-adenosylmethionine decarboxylase uORF; n=1; Daucus carota;Rep: S-adenosylmethionine decarboxylase uORF - Daucus carota (Carrot), partial (96%);Evalue=0;%ident=98.15|MAPMANSTORE: similar to UniRef100_Q6RUQ6 Cluster: S-adenosylmethionine decarboxylase uORF; n=1; Daucus carota;Rep: S-ade…	-2.96475	1.22783	0.000201248	0.0317186
59114	35.2	not assigned.unknown	|MERCATOR: (original description: no original description)||TAGI: TC410563;similar to UniRef100_Q10I26 Cluster: DEAD-box ATP-dependent RNA helicase 34; n=1; Oryza sativa Japonica Group;Rep: DEAD-box ATP-dependent RNA helicase 34 - Oryza sativa subsp. japonica (Rice), partial (9%);Evalue=0;%ident=98.77|MAPMANSTORE: similar to UniRef100_Q10I26 Cluster: DEAD-box ATP-dependent RNA helicase 34; n=1; O…	2.28782	0.852418	0.000365057	0.0403773
59134	35.2	not assigned.unknown	|MERCATOR: (original description: no original description)||TAGI: TC388218;;Evalue=0;%ident=99.74|MAPMANSTORE: weakly similar to ( 127) loc_os01g02950 12001.m06934 protein hypothetical protein||BREAD.WHEAT.TIGR: TA79120_4565; TA79120_4565; Evalue=0; %ident=99.87||BRACHYPODIUM GENOME: Bradi1g68200.1 ; weakly similar to ( 169) loc_os03g14310 12003.m06873 protein expressed proteinDUF1618 no original…	-5.12837	0.799213	0.000542853	0.0473005
59169	35.2	not assigned.unknown	|MERCATOR: (original description: no original description)||TAGI: TC423629;;Evalue=0;%ident=99.14|MAPMANSTORE: 0||BREAD.WHEAT.TIGR: TA80868_4565; TA80868_4565; Evalue=0; %ident=98.64|	-7.56099	0.0194553	3.07641e-06	0.00576177
59176	35.2	not assigned.unknown	|MERCATOR: (original description: no original description)||TAGI: TC408609;homologue to UniRef100_Q4SM93 Cluster: Chromosome 3 SCAF14553, whole genome shotgun sequence; n=1; Tetraodon nigroviridis;Rep: Chromosome 3 SCAF14553, whole genome shotgun sequence - Tetraodon nigroviridis (Green puffer), partial (5%);Evalue=0;%ident=94.08|MAPMANSTORE: homologue to UniRef100_Q4SM93 Cluster: Chromosome 3 SC…	-4.04515	0.423786	0.000231003	0.0331534
59441	35.2	not assigned.unknown	|MERCATOR: (original description: no original description)||TAGI: TC376457;weakly similar to UniRef100_A5L124 Cluster: TolA protein; n=1; Vibrionales bacterium SWAT-3;Rep: TolA protein - Vibrionales bacterium SWAT-3, partial (13%);Evalue=0;%ident=99.91|MAPMANSTORE: weakly similar to UniRef100_A5L124 Cluster: TolA protein; n=1; Vibrionales bacterium SWAT-3;Rep: TolA protein - Vibrionales bacterium…	-8.64787	2.68477	6.51218e-07	0.00267668
59981	35.2	not assigned.unknown	|MERCATOR: (original description: no original description)||TAGI: TC409451;;Evalue=0;%ident=99.65|MAPMANSTORE: 0||BREAD.WHEAT.TIGR: TA88107_4565; TA88107_4565; Evalue=0; %ident=98.79||RICE GENOME: Loc_Os02g44460.1 ; 12002.m09486 protein retrotransposon protein, putative, unclassified|	-4.87651	0.286779	1.64152e-05	0.0109816
60319	35.2	not assigned.unknown	|MERCATOR: (original description: no original description)||TAGI: CV771269;similar to UniRef100_Q50HV8 Cluster: Glycosyltransferase; n=1; Triticum aestivum;Rep: Glycosyltransferase - Triticum aestivum (Wheat), partial (9%);Evalue=4E-98;%ident=98.07|MAPMANSTORE: similar to UniRef100_Q50HV8 Cluster: Glycosyltransferase; n=1; Triticum aestivum;Rep: Glycosyltransferase - Triticum aestivum (Wheat), pa…	-2.00708	3.86654	0.00026006	0.0346564
60388	35.2	not assigned.unknown	|MERCATOR: (original description: no original description)|	2.02568	-0.263387	0.000574635	0.0482405
60455	35.2	not assigned.unknown	|MERCATOR: (original description: no original description)||TAGI: TC428376;similar to UniRef100_A9CIB1 Cluster: Cell division protein; n=1; Agrobacterium tumefaciens str. C58;Rep: Cell division protein - Agrobacterium tumefaciens (strain C58 / ATCC 33970), partial (4%);Evalue=9E-153;%ident=99.33|MAPMANSTORE: similar to UniRef100_A9CIB1 Cluster: Cell division protein; n=1; Agrobacterium tumefacien…	-4.49742	1.72833	6.74061e-05	0.0206013
62285	35.2	not assigned.unknown	|MERCATOR: (original description: no original description)||TAGI: TC414296;similar to UniRef100_A3D5R9 Cluster: Peptidase M1, membrane alanine aminopeptidase precursor; n=1; Shewanella baltica OS155;Rep: Peptidase M1, membrane alanine aminopeptidase precursor - Shewanella baltica (strain OS155 / ATCC BAA-1091), partial (4%);Evalue=0;%ident=97.89|MAPMANSTORE: similar to UniRef100_A3D5R9 Cluster: P…	-5.02726	1.31796	7.76302e-05	0.022912
62486	35.2	not assigned.unknown	|MERCATOR: (original description: no original description)||TAGI: TC433617;similar to UniRef100_A1UI54 Cluster: UDP-N-acetylglucosamine--N-acetylmuramyl-(pentapeptide) pyrophosphoryl-undecaprenol N-acetylglucosamine transferase; n=2; Mycobacterium;Rep: UDP-N-acetylglucosamine--N-acetylmuramyl-(pentapeptide) pyrophosphoryl-undecaprenol N-acetylglucosamine transferase - Mycobacterium sp. (strain KM…	-9.00099	0.725408	0.000200235	0.0317186
62529	35.2	not assigned.unknown	|MERCATOR: (original description: no original description)||TAGI: TC441327;homologue to UniRef100_Q6PNB5 Cluster: NADH dehydrogenase subunit 6; n=1; Steinernema carpocapsae;Rep: NADH dehydrogenase subunit 6 - Steinernema carpocapsae, partial (10%);Evalue=0;%ident=99.52|MAPMANSTORE: homologue to UniRef100_Q6PNB5 Cluster: NADH dehydrogenase subunit 6; n=1; Steinernema carpocapsae;Rep: NADH dehydrog…	-8.46898	1.01063	1.74323e-07	0.00130139
63431	35.2	not assigned.unknown	|MERCATOR: (loc_os12g20400.1 : 157.0) no description available & (at5g41980 : 66.6) CONTAINS InterPro DOMAIN/s: Putative harbinger transposase-derived nuclease (InterPro:IPR006912); BEST Arabidopsis thaliana protein match is: unknown protein (TAIR:AT1G43722.1); Has 1807 Blast hits to 1807 proteins in 277 species: Archae - 0; Bacteria - 0; Metazoa - 736; Fungi - 347; Plants - 385; Viruses - 0; Oth…	-2.92352	2.88346	6.67562e-05	0.0205526
63478	35.2	not assigned.unknown	|MERCATOR: (original description: no original description)||TAGI: TC401955;homologue to UniRef100_Q7Q6U6 Cluster: AGAP005661-PB; n=1; Anopheles gambiae str. PEST;Rep: AGAP005661-PB - Anopheles gambiae str. PEST, partial (3%);Evalue=0;%ident=96.17|MAPMANSTORE: homologue to UniRef100_Q7Q6U6 Cluster: AGAP005661-PB; n=1; Anopheles gambiae str. PEST;Rep: AGAP005661-PB - Anopheles gambiae str. PEST, pa…	-2.95109	2.27763	0.000577474	0.0483577
63720	35.2	not assigned.unknown	|MERCATOR: (original description: no original description)||TAGI: TC411288;similar to UniRef100_A4RW22 Cluster: Predicted protein; n=1; Ostreococcus lucimarinus CCE9901;Rep: Predicted protein - Ostreococcus lucimarinus (strain CCE9901), partial (5%);Evalue=0;%ident=96.89|MAPMANSTORE: similar to UniRef100_A4RW22 Cluster: Predicted protein; n=1; Ostreococcus lucimarinus CCE9901;Rep: Predicted prote…	-6.0032	1.35132	1.81496e-05	0.0111507
65456	35.2	not assigned.unknown	|MERCATOR: (original description: no original description)||TAGI: TC435979;weakly similar to UniRef100_Q10R26 Cluster: Expressed protein; n=1; Oryza sativa Japonica Group;Rep: Expressed protein - Oryza sativa subsp. japonica (Rice), partial (6%);Evalue=0;%ident=98.36|MAPMANSTORE: weakly similar to ( 149) loc_os03g07970 12003.m06307 protein expressed protein weakly similar to UniRef100_Q10R26 Clus…	-11.37	1.30304	9.43729e-06	0.00864202
67467	35.2	not assigned.unknown	|MERCATOR: (original description: no original description)||TAGI: CA686794;weakly similar to UniRef100_Q0AFC0 Cluster: Heavy metal translocating P-type ATPase; n=1; Nitrosomonas eutropha C91;Rep: Heavy metal translocating P-type ATPase - Nitrosomonas eutropha (strain C71), partial (3%);Evalue=0;%ident=98.42|MAPMANSTORE: very weakly similar to (85.5) loc_os01g24420 12001.m08910 protein expressed p…	-2.57557	4.42869	0.000294236	0.0368568
67731	35.2	not assigned.unknown	|MERCATOR: (original description: no original description)||TAGI: TC451442;weakly similar to UniRef100_Q21P83 Cluster: Nitrogen regulatory protein P-II; n=1; Saccharophagus degradans 2-40;Rep: Nitrogen regulatory protein P-II - Saccharophagus degradans (strain 2-40 / ATCC 43961 / DSM 17024), partial (17%);Evalue=0;%ident=96.56|MAPMANSTORE: weakly similar to UniRef100_Q21P83 Cluster: Nitrogen regu…	-8.26948	2.60743	0.000125309	0.0257943
69196	35.2	not assigned.unknown	|MERCATOR: (loc_os05g46690.1 : 387.0) no description available & (at5g45470 : 93.6) Protein of unknown function (DUF594); FUNCTIONS IN: molecular_function unknown; INVOLVED IN: biological_process unknown; LOCATED IN: plasma membrane; EXPRESSED IN: callus; CONTAINS InterPro DOMAIN/s: Protein of unknown function DUF594 (InterPro:IPR007658); BEST Arabidopsis thaliana protein match is: unknown protei…	-2.89145	4.61355	6.5431e-05	0.0205526
70699	35.2	not assigned.unknown	|MERCATOR: (original description: no original description)||BREAD.WHEAT.TIGR: TA87979_4565; SCAR-like protein 1 [Oryza sativa (Rice)]; Evalue=0; %ident=97.43||BRACHYPODIUM GENOME: Bradi4g05810.1 ; no original description||RICE GENOME: Loc_Os11g30820.1 ; 12011.m06987 protein expressed protein|	-10.0262	2.59074	1.70483e-05	0.0110369
70904	35.2	not assigned.unknown	|MERCATOR: (original description: no original description)||BREAD.WHEAT.TIGR: BJ222356; Hypothetical protein [Oryza sativa (japonica cultivar-group)]; Evalue=0; %ident=99.37||BRACHYPODIUM GENOME: Bradi4g13087.1 ; highly similar to ( 851) loc_os07g40360 12007.m08278 protein transposon protein, putative, CACTA, En/Spm sub-classTransposase_21 no original description||RICE GENOME: Loc_Os10g08450.1 ; …	-6.49892	2.9603	0.000401259	0.0423274
73781	35.2	not assigned.unknown	|MERCATOR: (original description: no original description)||BREAD.WHEAT.TIGR: CJ680363; Cellulose synthase-like C3 [Oryza sativa (japonica cultivar-group)]; Evalue=1E-101; %ident=99.51|	-12.1471	2.07431	2.0238e-05	0.0117164
73987	35.2	not assigned.unknown	|MERCATOR: (original description: no original description)||BREAD.WHEAT.TIGR: AF002211; Glutathione S-transferase [Triticum aestivum (Wheat)]; Evalue=3E-97; %ident=98.51|	-6.77392	3.80876	4.4011e-06	0.00662958
76567	35.2	not assigned.unknown	|MERCATOR: (original description: no original description)||BREAD.WHEAT.TIGR: CA733412; Leucine Rich Repeat, putative [Oryza sativa (japonica cultivar-group)]; Evalue=0; %ident=100|	-9.11258	1.99784	0.000260172	0.0346564
76589	35.2	not assigned.unknown	|MERCATOR: (original description: no original description)||BREAD.WHEAT.TIGR: CV774708; CV774708; Evalue=0; %ident=98.89|	-10.8657	3.27439	9.59106e-06	0.00864202
78688	35.2	not assigned.unknown	|MERCATOR: (original description: no original description)||BREAD.WHEAT.TIGR: TA52824_4565; Putative ubiquitin-activating enzyme [Oryza sativa (japonica cultivar-group)]; Evalue=5E-47; %ident=97.3|	-7.62332	3.11242	1.53692e-05	0.0105155
78825	35.2	not assigned.unknown	|MERCATOR: (original description: no original description)|	-9.23378	2.55967	2.98946e-05	0.0138456
80773	35.2	not assigned.unknown	|MERCATOR: (original description: no original description)|	-11.1621	1.10056	8.919e-05	0.0236979
81142	35.2	not assigned.unknown	|MERCATOR: (original description: no original description)|	-8.99928	-0.97376	0.00013685	0.0265794
81364	35.2	not assigned.unknown	|MERCATOR: (original description: no original description)|	-6.1507	1.59795	0.000228496	0.0331534
86581	35.2	not assigned.unknown	|MERCATOR: (original description: no original description)|	-8.85432	0.53638	0.000201196	0.0317186
90129	35.2	not assigned.unknown	|MERCATOR: (original description: no original description)|	-10.8274	0.76657	5.36511e-05	0.0190812
94423	35.2	not assigned.unknown	|MERCATOR: (original description: no original description)||BREAD.WHEAT.TIGR: CA729899; CA729899; Evalue=4E-154; %ident=100|	5.42771	0.0456314	8.63875e-05	0.0236979
96447	35.2	not assigned.unknown	|MERCATOR: no hits & (original description: no original description)||BREAD.WHEAT.TIGR: TA52033_4565; TA52033_4565; Evalue=2E-109; %ident=100|	-9.47449	-0.539538	0.000247884	0.0339974
100550	35.2	not assigned.unknown	|MERCATOR: (original description: no original description)||BREAD.WHEAT.TIGR: TA98853_4565; TA98853_4565; Evalue=0.000000000000002; %ident=88.57|	-9.00903	-0.964306	0.000509773	0.0455385
106800	35.2	not assigned.unknown	|MERCATOR: (original description: no original description)||BREAD.WHEAT.TIGR: TA89744_4565; Indole-3-glycerol phosphate lyase [Hordeum lechleri (Wild barley)]; Evalue=1E-151; %ident=99.66||BRACHYPODIUM GENOME: Bradi4g38110.1 ; weakly similar to ( 111) loc_os01g27430 12001.m09193 protein retrotransposon protein, putative, unclassified no original description||RICE GENOME: Loc_Os01g27430.1 ; 12001.…	-8.13995	-0.152382	0.000307653	0.037573
111057	35.2	not assigned.unknown	|MERCATOR: (original description: no original description)|	-6.8455	-0.135078	0.000428467	0.0430371
111632	35.2	not assigned.unknown	|MERCATOR: (original description: no original description)||BREAD.WHEAT.TIGR: BG905732; Putative hydrolase [Oryza sativa (japonica cultivar-group)]; Evalue=4E-52; %ident=100|	-9.80908	-0.22458	0.000171473	0.0294607
112553	35.2	not assigned.unknown	|MERCATOR: (original description: no original description)||BREAD.WHEAT.TIGR: TA92817_4565; TA92817_4565; Evalue=0; %ident=100||BRACHYPODIUM GENOME: Bradi4g22040.1 ; no original description|	-8.33352	0.199824	0.000227969	0.0331534
113318	35.2	not assigned.unknown	|MERCATOR: (original description: no original description)||BREAD.WHEAT.TIGR: TA72015_4565; Putative phosphoinositide phosphatase [Oryza sativa (Rice)]; Evalue=5E-115; %ident=100|	-6.86953	0.0703391	7.64975e-06	0.00837425
114455	35.2	not assigned.unknown	|MERCATOR: (original description: no original description)|	-7.13407	0.0904753	0.000167276	0.0291886
116045	35.2	not assigned.unknown	|MERCATOR: (original description: no original description)||BREAD.WHEAT.TIGR: TA86367_4565; TA86367_4565; Evalue=0; %ident=100|	-7.16889	-1.02528	0.000449012	0.0433439
117390	35.2	not assigned.unknown	|MERCATOR: no hits & (original description: no original description)|	-8.37977	-1.4703	0.000397245	0.0423274
118628	35.2	not assigned.unknown	|MERCATOR: (original description: no original description)||BREAD.WHEAT.TIGR: TA92382_4565; TA92382_4565; Evalue=0; %ident=100|	-7.92638	0.899191	0.000342997	0.0397145
121963	35.2	not assigned.unknown	|MERCATOR: (original description: no original description)||BREAD.WHEAT.TIGR: EB513477; Oxidoreductase, short chain dehydrogenase/reductase family [Oryza sativa (japonica cultivar-group)]; Evalue=0.000000000000001; %ident=100|	-5.84585	-0.114468	0.000290907	0.0367195
125413	35.2	not assigned.unknown	|MERCATOR: (original description: no original description)||BREAD.WHEAT.TIGR: TA104994_4565; TA104994_4565; Evalue=0; %ident=97.86|	4.36629	-0.208088	0.000115559	0.0252485
128875	35.2	not assigned.unknown	|MERCATOR: (original description: no original description)||BREAD.WHEAT.TIGR: TA69870_4565; Hypothetical protein [Arabidopsis thaliana (Mouse-ear cress)]; Evalue=1E-136; %ident=100|	-9.13123	-0.854328	0.000429931	0.0430371
128879	35.2	not assigned.unknown	|MERCATOR: (original description: no original description)||BREAD.WHEAT.TIGR: CD882662; CD882662; Evalue=4E-39; %ident=97.89|	-9.65388	-0.370358	9.46428e-07	0.00290333
129063	35.2	not assigned.unknown	|MERCATOR: (original description: no original description)||BREAD.WHEAT.TIGR: TA79154_4565; Heat shock factor protein hsf8-like [Oryza sativa (japonica cultivar-group)]; Evalue=0; %ident=99.44|	-8.20818	-0.0658404	0.000274514	0.0356211
129694	35.2	not assigned.unknown	|MERCATOR: (original description: no original description)||BREAD.WHEAT.TIGR: CA697076; CA697076; Evalue=3E-98; %ident=96|	-9.10009	-0.86391	8.72658e-05	0.0236979
130418	35.2	not assigned.unknown	|MERCATOR: (original description: no original description)|	-7.53637	0.57273	8.63466e-05	0.0236979
132891	35.2	not assigned.unknown	|MERCATOR: (original description: no original description)||BREAD.WHEAT.TIGR: BE517137; BE517137; Evalue=4E-153; %ident=96.9||BRACHYPODIUM GENOME: Bradi3g32660.1 ; nearly identical (1005) AT2G27900 | Symbols: | unknown protein | chr2:11877654-11885238 FORWARDnearly identical (1605) loc_os10g39910 12010.m06762 protein expressed protein no original description|	3.24955	-0.467222	0.000277708	0.0356757
134824	35.2	not assigned.unknown	|MERCATOR: (original description: no original description)||BREAD.WHEAT.TIGR: CD872142; CD872142; Evalue=0; %ident=100|	-8.15294	0.0199711	0.000172294	0.0294607
137812	35.2	not assigned.unknown	|MERCATOR: (original description: no original description)||BREAD.WHEAT.TIGR: CK153204; BSD domain, putative [Oryza sativa (japonica cultivar-group)]; Evalue=0; %ident=99.82||BRACHYPODIUM GENOME: Bradi3g08310.2 ; moderately similar to ( 241) loc_os09g39310 12009.m06870 protein expressed protein no original description||RICE GENOME: Loc_Os09g39310.1 ; 12009.m06870 protein expressed protein|	-8.56671	0.297655	0.000304012	0.0372795
138937	35.2	not assigned.unknown	|MERCATOR: (original description: no original description)|	6.19531	-0.04538	0.000300431	0.0370448
141057	35.2	not assigned.unknown	|MERCATOR: (original description: no original description)||BREAD.WHEAT.TIGR: TA73286_4565; TA73286_4565; Evalue=0; %ident=100|	-6.58099	-0.277578	0.000233122	0.0331534
147541	35.2	not assigned.unknown	|MERCATOR: (original description: no original description)||BREAD.WHEAT.TIGR: TA87619_4565; TA87619_4565; Evalue=0; %ident=100|	-9.98588	-0.0577984	9.64417e-07	0.00290333
147811	35.2	not assigned.unknown	|MERCATOR: (original description: no original description)||BREAD.WHEAT.TIGR: TA91522_4565; TA91522_4565; Evalue=0; %ident=100|	-9.31175	1.04589	2.5656e-05	0.0133085
167892	35.2	not assigned.unknown	|MERCATOR: (original description: no original description)|	2.83287	-1.45543	0.000141941	0.0271305
168812	35.2	not assigned.unknown	|MERCATOR: (original description: no original description)||BREAD.WHEAT.TIGR: CA501390; CA501390; Evalue=0; %ident=100|	-9.26047	-0.723333	0.000367812	0.0404706
173398	35.2	not assigned.unknown	|MERCATOR: (original description: no original description)||BREAD.WHEAT.TIGR: CJ700512; Putative rab1 small GTP-binding protein [Oryza sativa (japonica cultivar-group)]; Evalue=3E-128; %ident=100|	-9.06281	-0.884141	0.000226868	0.0331534
178357	35.2	not assigned.unknown	|MERCATOR: (original description: no original description)|	3.13696	-0.934194	0.000483083	0.0450247
181363	35.2	not assigned.unknown	|MERCATOR: (original description: no original description)||BREAD.WHEAT.TIGR: CA663416; CA663416; Evalue=4E-46; %ident=100|	-9.43115	-0.571968	0.000194567	0.0312392
184397	35.2	not assigned.unknown	|MERCATOR: (original description: no original description)||BRACHYPODIUM GENOME: Bradi2g18590.1 ; no original description|	3.84558	-0.484833	0.000315153	0.0381267
188483	35.2	not assigned.unknown	|MERCATOR: (original description: no original description)||BREAD.WHEAT.TIGR: TA84730_4565; TA84730_4565; Evalue=0; %ident=100||RICE GENOME: Loc_Os07g10120.1 ; 12007.m05467 protein expressed protein|	-7.97379	0.486899	0.000211499	0.0321569
193106	35.2	not assigned.unknown	|MERCATOR: (original description: no original description)||BREAD.WHEAT.TIGR: TA57219_4565; Flavanone 3-hydroxylase, putative [Oryza sativa (japonica cultivar-group)]; Evalue=0; %ident=99.72|	-8.96925	-1.00897	0.00052987	0.0466682
195083	35.2	not assigned.unknown	|MERCATOR: (original description: no original description)||BREAD.WHEAT.TIGR: CA654510; CA654510; Evalue=5E-106; %ident=99.06|	-8.68289	-1.23008	0.000108515	0.0243833
199809	35.2	not assigned.unknown	|MERCATOR: (original description: no original description)||BREAD.WHEAT.TIGR: TA94175_4565; TA94175_4565; Evalue=0; %ident=100|	-9.45012	-0.56736	0.000174988	0.0295311
200111	35.2	not assigned.unknown	|MERCATOR: (original description: no original description)||BREAD.WHEAT.TIGR: BF478849; BF478849; Evalue=8E-89; %ident=99.44|	-6.31827	-1.72665	0.000120456	0.0254141
201040	35.2	not assigned.unknown	|MERCATOR: (original description: no original description)|	-7.16286	-1.02133	0.000484769	0.045047
208505	35.2	not assigned.unknown	|MERCATOR: (original description: no original description)||BREAD.WHEAT.TIGR: CJ674110; CJ674110; Evalue=5E-142; %ident=96.7|	3.06741	-1.24967	0.000141201	0.0271092
213502	35.2	not assigned.unknown	|MERCATOR: (original description: no original description)||BREAD.WHEAT.TIGR: CK206465; CK206465; Evalue=0; %ident=99.26|	-6.60254	-0.423638	0.000230648	0.0331534
220380	35.2	not assigned.unknown	|MERCATOR: (original description: no original description)||BREAD.WHEAT.TIGR: BJ306996; Putative cytosolic tRNA-Ala synthetase [Oryza sativa (japonica cultivar-group)]; Evalue=8E-139; %ident=100|	-8.63221	-1.28868	0.000359444	0.0401
221013	35.2	not assigned.unknown	|MERCATOR: (original description: no original description)|	-8.86468	-1.09308	0.000562741	0.0477212
225488	35.2	not assigned.unknown	|MERCATOR: (original description: no original description)|	-9.36068	-0.644018	0.000187177	0.0305412
271657	35.2	not assigned.unknown	|MERCATOR: (original description: no original description)||BREAD.WHEAT.TIGR: TA103476_4565; TA103476_4565; Evalue=0; %ident=99.34|	-9.26051	-0.730378	0.000427915	0.0430371
274408	35.2	not assigned.unknown	|MERCATOR: (original description: no original description)||BREAD.WHEAT.TIGR: CD923800; CD923800; Evalue=0.000000000000002; %ident=100||BRACHYPODIUM GENOME: Bradi2g19110.1 ; very weakly similar to (91.3) loc_os05g08090 12005.m083635 protein expressed protein no original description|	-7.60487	-2.13321	0.000455257	0.0435088
277588	35.2	not assigned.unknown	|MERCATOR: (original description: no original description)|	7.85013	-1.62176	0.000192461	0.031066
282388	35.2	not assigned.unknown	|MERCATOR: (original description: no original description)|	8.81481	-0.88412	0.000440926	0.0432863
289598	35.2	not assigned.unknown	|MERCATOR: (original description: no original description)||BREAD.WHEAT.TIGR: TA96870_4565; TA96870_4565; Evalue=0; %ident=100|	-9.70998	-0.323882	0.00020717	0.0318624
317219	35.2	not assigned.unknown	|MERCATOR: (original description: no original description)|	3.88148	-1.52571	9.63507e-05	0.0240713
330461	35.2	not assigned.unknown	|MERCATOR: (original description: no original description)|	-9.00903	-0.973243	0.000499332	0.0452857
343000	35.2	not assigned.unknown	|MERCATOR: no hits & (original description: no original description)||BREAD.WHEAT.TIGR: BF483323; BF483323; Evalue=1E-131; %ident=98.5|	3.92986	-2.02296	0.000375869	0.0409235
344708	35.2	not assigned.unknown	|MERCATOR: (original description: no original description)||BREAD.WHEAT.TIGR: CA636225; CA636225; Evalue=1E-153; %ident=98.39|	-4.20311	-1.95291	0.000426197	0.0430371
348045	35.2	not assigned.unknown	|MERCATOR: (loc_os04g01520.1 : 155.0) no description available & (at1g18010 : 127.0) Major facilitator superfamily protein; FUNCTIONS IN: molecular_function unknown; INVOLVED IN: transmembrane transport; LOCATED IN: cellular_component unknown; CONTAINS InterPro DOMAIN/s: Major facilitator superfamily MFS-1 (InterPro:IPR011701), Major facilitator superfamily, general substrate transporter (InterPr…	6.11729	-1.31109	0.000467777	0.0442141
366996	35.2	not assigned.unknown	|MERCATOR: (original description: no original description)||BREAD.WHEAT.TIGR: CA661157; CA661157; Evalue=2E-104; %ident=100|	-7.15101	-2.39047	0.000534496	0.0468435
387755	35.2	not assigned.unknown	|MERCATOR: (original description: no original description)|	3.86524	-2.0662	0.00027677	0.0356757
397141	35.2	not assigned.unknown	|MERCATOR: (original description: no original description)|	5.96159	-2.71724	0.000492503	0.0451904
470217	35.2	not assigned.unknown	|MERCATOR: (original description: no original description)|	5.77577	-2.48823	0.000391679	0.0420367

## Sheet: High temperature FDR<0.05
Supplementary Table 4. (B) Differentially expressed transcripts under high temperature (AC-HT) relative to the treatment under ambient [CO2] and temperature (AC-AT) considering a FDR value <0.05 and a fold-change <-2 or >2 for down or upregulated genes, respectively.
IDENTIFIER	BINCODE	NAME	DESCRIPTION	logFC	logCPM	PValue	FDR
41213	1.1.1.2	PS.lightreaction.photosystem II.PSII polypeptide subunits	|MERCATOR: (original description: no original description)||TAGI: TC399258;photosystem II polypeptide [Triticum aestivum];Evalue=0;%ident=98.75|MAPMANSTORE: weakly similar to ( 131) AT1G79040 ; Symbols: PSBR ; PSBR (photosystem II subunit R) ; chr1:29736085-29736781 FORWARDweakly similar to ( 149) PSBR_SPIOL Photosystem II 10 kDa polypeptide, chloroplast precursor - Spinacia oleracea (Spinach)wea…	-3.70543	2.18048	8.4048e-05	0.01643
52830	1.1.30	PS.lightreaction.state transition	|MERCATOR: (loc_os11g10690.1 : 199.0) no description available & (at4g23200 : 123.0) Encodes a cysteine-rich receptor-like protein kinase.; cysteine-rich RLK (RECEPTOR-like protein kinase) 12 (CRK12); FUNCTIONS IN: protein serine/threonine kinase activity, protein kinase activity, ATP binding; INVOLVED IN: protein amino acid phosphorylation; LOCATED IN: vacuole; EXPRESSED IN: 7 plant structures; …	-10.0496	2.89697	9.70519e-06	0.00489373
60526	1.1.30	PS.lightreaction.state transition	|MERCATOR: (loc_os12g14480.1 : 88.2) no description available & (at1g69730 : 68.6) Wall-associated kinase family protein; FUNCTIONS IN: kinase activity; INVOLVED IN: protein amino acid phosphorylation; LOCATED IN: endomembrane system, integral to membrane; EXPRESSED IN: 18 plant structures; EXPRESSED DURING: 12 growth stages; CONTAINS InterPro DOMAIN/s: Wall-associated kinase (InterPro:IPR013695)…	-8.0579	2.47551	1.45399e-05	0.00618529
66804	1.1.30	PS.lightreaction.state transition	|MERCATOR: (gnl|cdd|38301 : 58.1) no description available & (loc_os11g39490.1 : 53.1) no description available & (at4g01330 : 46.6) Protein kinase superfamily protein; FUNCTIONS IN: protein serine/threonine kinase activity, protein kinase activity, kinase activity, ATP binding; INVOLVED IN: protein amino acid phosphorylation; EXPRESSED IN: 22 plant structures; EXPRESSED DURING: 13 growth stages;…	-3.10245	4.69388	0.00018552	0.0240215
70012	1.1.30	PS.lightreaction.state transition	|MERCATOR: (loc_os11g17380.1 : 194.0) no description available & (at5g53890 : 58.2) Encodes a leucine-rich repeat receptor kinase (LRR-RK) involved in the perception of phytosulfokine (PSK), which is a 5-aa tyrosine-sulfated peptide that primarily promotes cellular proliferation.; phytosylfokine-alpha receptor 2 (PSKR2); FUNCTIONS IN: peptide receptor activity, protein serine/threonine kinase act…	-3.56747	3.53019	0.000119432	0.0194682
53049	1.1.40	PS.lightreaction.cyclic electron flow-chlororespiration	|MERCATOR: (loc_os03g63010.2 : 50.4) no description available & (gnl|cdd|36433 : 48.5) no description available & (at4g22260 : 45.4) Similar to mitochondrial alternative oxidase. im mutants have a variegated phenotype and fail to differentiate chloroplasts in the majority of their cells under high light intensity continuous illumination. The white tissues of immutans accumulate phytoene, a non-co…	-10.513	2.49042	2.13038e-05	0.00796698
68464	1.3.1	PS.calvin cycle.rubisco large subunit	|MERCATOR: (original description: no original description)||TAGI: TC403490;similar to emb;Z18289.1;PPC16SRNA Palmaria palmata Chloroplast for 16SrRNA gene, partial (12%);Evalue=0;%ident=85.19|MAPMANSTORE: similar to emb;Z18289.1;PPC16SRNA Palmaria palmata Chloroplast for 16SrRNA gene, partial (12%)||DURUM.WHEAT.TIGR: TA567_4571; Hypothetical protein [Syntrophomonas wolfei str. Goettingen]; Evalue…	4.59708	5.59186	6.71506e-05	0.0147451
56982	1.3.13	PS.calvin cycle.rubisco interacting	|MERCATOR: (q42450|rcab_horvu : 132.0) Ribulose bisphosphate carboxylase/oxygenase activase B, chloroplast precursor (RuBisCO activase B) (RA B) - Hordeum vulgare (Barley) & (loc_os11g47970.3 : 104.0) no description available & (at2g39730 : 56.2) Rubisco activase, a nuclear-encoded chloroplast protein that consists of two isoforms arising from alternative splicing in most plants. Required for the…	3.12741	4.82065	2.38532e-05	0.0085104
52916	2.2.1.3.2	major CHO metabolism.degradation.sucrose.invertases.cell wall	|MERCATOR: (q56ud4|inv2_orysa : 417.0) Beta-fructofuranosidase, insoluble isoenzyme 2 precursor (EC 3.2.1.26) (Sucrose hydrolase 2) (Invertase 2) (Cell wall beta-fructosidase 2) (OsCIN2) - Oryza sativa (Rice) & (loc_os04g33740.1 : 417.0) no description available & (at3g52600 : 275.0) cell wall invertase 2 (CWINV2); FUNCTIONS IN: hydrolase activity, hydrolyzing O-glycosyl compounds; INVOLVED IN: c…	-2.05485	1.23132	7.76149e-05	0.0160038
63678	3.5	minor CHO metabolism.others	|MERCATOR: (loc_os04g51390.2 : 320.0) no description available & (at5g57330 : 294.0) Galactose mutarotase-like superfamily protein; FUNCTIONS IN: isomerase activity, carbohydrate binding, aldose 1-epimerase activity, catalytic activity; INVOLVED IN: galactose metabolic process, carbohydrate metabolic process; LOCATED IN: cellular_component unknown; EXPRESSED IN: 26 plant structures; EXPRESSED DUR…	-2.13019	4.18809	0.000751431	0.049827
22024	3.6	minor CHO metabolism.callose	|MERCATOR: (loc_os01g55820.1 : 64.3) no description available & (gnl|cdd|38301 : 56.6) no description available & (at5g61130 : 54.3) Encodes a plasmodesmatal localized protein with callose binding activity. The function of PDCB1 is unknown but overexpression leads to the hyperaccumulation of callose.; plasmodesmata callose-binding protein 1 (PDCB1); FUNCTIONS IN: callose binding, polysaccharide b…	-3.53427	-0.890425	6.28316e-05	0.0143297
35102	3.6	minor CHO metabolism.callose	|MERCATOR: (loc_os01g48200.1 : 636.0) no description available & (at4g03550 : 496.0) Encodes a callose synthase that is required for wound and papillary callose formation in response to fungal pathogens Erysiphe and Blumeria. Mutants are resistant to P. parasitica and exhibit an exaggerated PR1 response.Contributes to PAMP-induced basal defense.; glucan synthase-like 5 (GSL05); FUNCTIONS IN: tran…	-8.1113	0.122575	4.27395e-05	0.0112864
37007	3.6	minor CHO metabolism.callose	|MERCATOR: (loc_os01g55040.1 : 329.0) no description available & (at4g04970 : 328.0) encodes a gene similar to callose synthase; glucan synthase-like 1 (GSL1); FUNCTIONS IN: transferase activity, transferring glycosyl groups, 1,3-beta-glucan synthase activity; INVOLVED IN: reproduction, 1,3-beta-glucan biosynthetic process, pollen development; LOCATED IN: 1,3-beta-glucan synthase complex, plasma …	-6.98929	-0.113867	0.000365067	0.034506
40809	4.1.8	glycolysis.cytosolic branch.glyceraldehyde 3-phosphate dehydrogenase (GAP-DH)	|MERCATOR: no hits & (original description: no original description)||TAGI: TC417401;homologue to UniRef100_A5YVV3 Cluster: Glyceraldehyde-3-phosphate dehydrogenase; n=3; Triticum;Rep: Glyceraldehyde-3-phosphate dehydrogenase - Triticum aestivum (Wheat), partial (50%);Evalue=1E-110;%ident=100|MAPMANSTORE: moderately similar to ( 217) AT3G04120 ; Symbols: GAPC, GAPC-1, GAPC1 ; GAPC1 (GLYCERALDEHYD…	-5.70345	-0.86885	4.81917e-05	0.0118986
45558	4.1.8	glycolysis.cytosolic branch.glyceraldehyde 3-phosphate dehydrogenase (GAP-DH)	|MERCATOR: (original description: no original description)||TAGI: TC417401;homologue to UniRef100_A5YVV3 Cluster: Glyceraldehyde-3-phosphate dehydrogenase; n=3; Triticum;Rep: Glyceraldehyde-3-phosphate dehydrogenase - Triticum aestivum (Wheat), partial (50%);Evalue=1E-131;%ident=99.61|MAPMANSTORE: moderately similar to ( 217) AT3G04120 ; Symbols: GAPC, GAPC-1, GAPC1 ; GAPC1 (GLYCERALDEHYDE-3-PHOS…	-9.72902	-0.140078	7.16603e-07	0.001269
15521	4.1.11	glycolysis.cytosolic branch.3-phosphoglycerate kinase (PGK)	|MERCATOR: (p12783|pgky_wheat : 63.5) Phosphoglycerate kinase, cytosolic (EC 2.7.2.3) - Triticum aestivum (Wheat) & (loc_os02g07260.3 : 62.4) no description available & (gnl|cdd|38301 : 57.3) no description available & (at1g79550 : 57.0) Encodes cytosolic phosphoglycerate kinase (PGK).; phosphoglycerate kinase (PGK); FUNCTIONS IN: phosphoglycerate kinase activity; INVOLVED IN: glycolysis; LOCATED…	-3.41386	3.38395	1.3701e-07	0.000485249
41087	8.3	TCA / org. transformation.carbonic anhydrases	|MERCATOR: (p40880|cahc_horvu : 181.0) Carbonic anhydrase, chloroplast precursor (EC 4.2.1.1) (Carbonate dehydratase) - Hordeum vulgare (Barley) & (loc_os01g45274.4 : 176.0) no description available & (at5g14740 : 120.0) Encodes a beta carbonic anhydrase likely to be localized in the cytoplasm. Expression of its mRNA is seen in etiolated seedlings and points to a possible nonphotosynthetic role f…	-3.11765	0.700148	8.97895e-07	0.00138619
34649	9.2.1.2	mitochondrial electron transport / ATP synthesis.NADH-DH.type II.external	|MERCATOR: (loc_os05g26660.1 : 449.0) no description available & (at4g21490 : 350.0) NAD(P)H dehydrogenase B3 (NDB3); FUNCTIONS IN: NADH dehydrogenase activity; INVOLVED IN: oxidation reduction; EXPRESSED IN: 10 plant structures; EXPRESSED DURING: 4 anthesis, petal differentiation and expansion stage; CONTAINS InterPro DOMAIN/s: FAD-dependent pyridine nucleotide-disulphide oxidoreductase (InterPr…	-3.2802	-0.923775	0.000344402	0.0332309
49155	10.2.1	cell wall.cellulose synthesis.cellulose synthase	|MERCATOR: (loc_os10g32980.1 : 227.0) no description available & (at5g44030 : 217.0) Encodes a cellulose synthase involved in secondary cell wall biosynthesis. Confers resistance towards bacterial and fungal pathogens, independent of salicylic acid, ethylene and jasmonate signaling.; cellulose synthase A4 (CESA4); FUNCTIONS IN: cellulose synthase activity, transferase activity, transferring glyco…	-3.27617	-0.547117	0.00072239	0.0489342
38230	10.5.1.1	cell wall.cell wall proteins.AGPs.AGP	|MERCATOR: (loc_os08g23180.1 : 213.0) no description available & (at4g12730 : 130.0) AF333971 Arabidopsis thaliana fasciclin-like arabinogalactan-protein 2 (Fla2) mRNA, complete cds; FASCICLIN-like arabinogalactan 2 (FLA2); INVOLVED IN: response to cyclopentenone; LOCATED IN: anchored to plasma membrane, plasma membrane, anchored to membrane, membrane; EXPRESSED IN: 25 plant structures; EXPRESSED…	-4.51868	-1.50902	0.000278751	0.0295481
48588	10.5.3	cell wall.cell wall proteins.LRR	|MERCATOR: (loc_os01g41750.1 : 172.0) no description available & (at1g34110 : 78.6) Leucine-rich receptor-like protein kinase family protein; FUNCTIONS IN: protein serine/threonine kinase activity, protein kinase activity, ATP binding; INVOLVED IN: transmembrane receptor protein tyrosine kinase signaling pathway, protein amino acid phosphorylation; LOCATED IN: endomembrane system; EXPRESSED IN: 1…	-9.93182	0.0851788	9.79444e-05	0.0175824
49343	10.5.3	cell wall.cell wall proteins.LRR	|MERCATOR: (loc_os01g06730.1 : 117.0) no description available & (at1g17750 : 59.7) Encodes PEPR2, a plasma membrane leucine-rich repeat receptor kinase functioning as a receptor for the Pep1 and Pep2 peptides. Pep1 and Pep2 are amino acids that induce the transcription of defense-related genes.; PEP1 receptor 2 (PEPR2); FUNCTIONS IN: protein serine/threonine kinase activity, peptide binding, kin…	-10.5412	0.655051	4.60357e-05	0.0116952
53858	10.6.2	cell wall.degradation.mannan-xylose-arabinose-fucose	|MERCATOR: (loc_os03g14010.3 : 84.0) no description available & (gnl|cdd|36433 : 56.6) no description available & (at4g38650 : 48.9) Glycosyl hydrolase family 10 protein; FUNCTIONS IN: cation binding, hydrolase activity, hydrolyzing O-glycosyl compounds, catalytic activity; INVOLVED IN: carbohydrate metabolic process; LOCATED IN: endomembrane system; CONTAINS InterPro DOMAIN/s: Glycoside hydrolas…	-2.01516	1.26455	5.89903e-05	0.0136766
44668	10.7	cell wall.modification	|MERCATOR: (loc_os10g39840.1 : 211.0) no description available & (at2g36870 : 174.0) xyloglucan endotransglucosylase/hydrolase 32 (XTH32); FUNCTIONS IN: hydrolase activity, acting on glycosyl bonds, hydrolase activity, hydrolyzing O-glycosyl compounds; INVOLVED IN: carbohydrate metabolic process; LOCATED IN: endomembrane system; EXPRESSED IN: 19 plant structures; EXPRESSED DURING: 13 growth stage…	-3.54627	-0.794897	3.08614e-05	0.00987727
64410	11.1.10	lipid metabolism.FA synthesis and FA elongation.beta ketoacyl CoA synthase	|MERCATOR: (loc_os03g14170.1 : 476.0) no description available & (at1g01120 : 334.0) Encodes a condensing enzyme KCS1 (3-ketoacyl-CoA synthase 1) which is involved in the critical fatty acid elongation process in wax biosynthesis.; 3-ketoacyl-CoA synthase 1 (KCS1); FUNCTIONS IN: fatty acid elongase activity, acyltransferase activity; INVOLVED IN: in 7 processes; LOCATED IN: cytosolic ribosome, en…	-2.37335	3.17177	3.08887e-07	0.000808599
43006	11.6	lipid metabolism.lipid transfer proteins etc	|MERCATOR: (original description: no original description)||TAGI: TC459677;similar to UniRef100_Q0JBY3 Cluster: Os04g0503500 protein; n=1; Oryza sativa Japonica Group;Rep: Os04g0503500 protein - Oryza sativa subsp. japonica (Rice), partial (23%);Evalue=3E-158;%ident=99.67|MAPMANSTORE: weakly similar to ( 174) AT1G15740 ; Symbols: ; leucine-rich repeat family protein ; chr1:5411509-5414544 FORWARD…	-8.70117	-1.09259	0.000742453	0.0494495
377262	11.6	lipid metabolism.lipid transfer proteins etc	|MERCATOR: (o65091|nltp4_orysa : 70.1) Nonspecific lipid-transfer protein 4 precursor (LTP 4) - Oryza sativa (Rice) & (loc_os12g02290.1 : 70.1) no description available & (at5g59320 : 50.8) Predicted to encode a PR (pathogenesis-related) protein. Belongs to the lipid transfer protein (PR-14) family with the following members: At2g38540/LTP1, At2g38530/LTP2, At5g59320/LTP3, At5g59310/LTP4, At3g516…	-3.46911	-1.93625	0.000683366	0.0477178
1112	11.8.7	lipid metabolism."exotics" (steroids, squalene etc).trans-2-enoyl-CoA reductase (NADPH)	|MERCATOR: (at3g55360 : 117.0) Enoyl-CoA reductase is involved in all very long chain fatty acids (VLCFA) elongation reactions that are required for cuticular wax, storage lipid and sphingolipid metabolism. The protein is located in the ER, but in contrast to its yeast homolog TSC13 is not particularly enriched in the nuclear envelope-vacuole junction. Mutants in this gene show abnormal organ mor…	-8.21452	-1.4749	0.000558604	0.0427583
8386	11.9.3.1	lipid metabolism.lipid degradation.lysophospholipases.phospholipase D	|MERCATOR: (loc_os05g07880.2 : 206.0) no description available & (q43007|plda1_orysa : 191.0) Phospholipase D alpha 1 precursor (EC 3.1.4.4) (PLD alpha 1) (Choline phosphatase 1) (Phosphatidylcholine-hydrolyzing phospholipase D 1) - Oryza sativa (Rice) & (at3g15730 : 182.0) Encodes phospholipase D alpha 1 (PLD alpha 1). Positive regulator of abscisic acid (ABA) mediated stomatal movements. PLD al…	-3.25643	-1.20333	0.000330263	0.0325601
56774	11.9.3.3	lipid metabolism.lipid degradation.lysophospholipases.glycerophosphodiester phosphodiesterase	|MERCATOR: (loc_os01g02680.1 : 257.0) no description available & (at4g32300 : 58.9) S-domain-2 5 (SD2-5); FUNCTIONS IN: carbohydrate binding, protein kinase activity, kinase activity; INVOLVED IN: protein amino acid autophosphorylation; LOCATED IN: plasma membrane; EXPRESSED IN: 25 plant structures; EXPRESSED DURING: 15 growth stages; CONTAINS InterPro DOMAIN/s: Curculin-like (mannose-binding) le…	-3.06844	2.25882	0.000516973	0.0409905
58886	11.9	lipid metabolism.lipid degradation	|MERCATOR: (loc_os10g33540.1 : 269.0) no description available & (at1g03990 : 195.0) Long-chain fatty alcohol dehydrogenase family protein; FUNCTIONS IN: oxidoreductase activity, oxidoreductase activity, acting on CH-OH group of donors, FAD binding; CONTAINS InterPro DOMAIN/s: Glucose-methanol-choline oxidoreductase, N-terminal (InterPro:IPR000172), Glucose-methanol-choline oxidoreductase, C-term…	-3.00541	0.476955	2.38878e-05	0.0085104
64683	12.2.1	N-metabolism.ammonia metabolism.glutamate synthase	|MERCATOR: (original description: no original description)||TAGI: CD916566;similar to UniRef100_Q8P6H5 Cluster: Phage-related tail protein; n=1; Xanthomonas campestris pv. campestris;Rep: Phage-related, partial (3%);Evalue=0;%ident=98.97|MAPMANSTORE: similar to UniRef100_Q8P6H5 Cluster: Phage-related tail protein; n=1; Xanthomonas campestris pv. campestris;Rep: Phage-related, partial (3%)||BREAD.…	-2.24734	1.97679	0.000730408	0.0491364
25499	13.1.3.4.12	amino acid metabolism.synthesis.aspartate family.methionine.homocysteine S-methyltransferase	|MERCATOR: (original description: no original description)||TAGI: TC418511;similar to UniRef100_A7QS31 Cluster: Chromosome undetermined scaffold_155, whole genome shotgun sequence; n=1; Vitis vinifera;Rep: Chromosome undetermined scaffold_155, whole genome shotgun sequence - Vitis vinifera (Grape), partial (52%);Evalue=1E-110;%ident=100|MAPMANSTORE: moderately similar to ( 251) AT2G41040 ; Symbol…	-9.80437	-0.0572241	0.000124601	0.0197423
10113	13.1.6.1.1	amino acid metabolism.synthesis.aromatic aa.chorismate.3-deoxy-D-arabino-heptulosonate 7-phosphate synthase	|MERCATOR: (original description: no original description)||TAGI: TC396011;similar to UniRef100_A0D692 Cluster: Chromosome undetermined scaffold_392, whole genome shotgun sequence; n=1; Paramecium tetraurelia;Rep: Chromosome undetermined scaffold_392, whole genome shotgun sequence - Paramecium tetraurelia, partial (6%);Evalue=3E-169;%ident=99.69|MAPMANSTORE: similar to UniRef100_A0D692 Cluster: C…	-8.57249	-1.20918	2.99477e-05	0.0096942
52726	13.1.6.5.5	amino acid metabolism.synthesis.aromatic aa.tryptophan.tryptophan synthase	|MERCATOR: (loc_os03g58320.1 : 239.0) no description available & (p42390|trpa_maize : 209.0) Indole-3-glycerol phosphate lyase, chloroplast precursor (EC 4.1.2.8) (Indole synthase) (Tryptophan synthase alpha chain) (EC 4.2.1.20) (Benzoxazineless 1) - Zea mays (Maize) & (at4g02610 : 192.0) Aldolase-type TIM barrel family protein; CONTAINS InterPro DOMAIN/s: Tryptophan synthase, alpha chain, active…	-3.29231	0.757476	1.78761e-06	0.00188825
53424	13.1.6.5	amino acid metabolism.synthesis.aromatic aa.tryptophan	|MERCATOR: (loc_os04g59520.1 : 79.0) no description available & (at1g22610 : 63.9) C2 calcium/lipid-binding plant phosphoribosyltransferase family protein; FUNCTIONS IN: molecular_function unknown; INVOLVED IN: biological_process unknown; LOCATED IN: chloroplast; EXPRESSED IN: 22 plant structures; EXPRESSED DURING: 13 growth stages; CONTAINS InterPro DOMAIN/s: C2 membrane targeting protein (Inter…	-9.09574	1.08019	0.000182119	0.0237856
147983	13.1.6.5	amino acid metabolism.synthesis.aromatic aa.tryptophan	|MERCATOR: (at4g11610 : 115.0) C2 calcium/lipid-binding plant phosphoribosyltransferase family protein; CONTAINS InterPro DOMAIN/s: C2 membrane targeting protein (InterPro:IPR018029), C2 calcium/lipid-binding domain, CaLB (InterPro:IPR008973), Phosphoribosyltransferase C-terminal (InterPro:IPR013583), C2 calcium-dependent membrane targeting (InterPro:IPR000008); BEST Arabidopsis thaliana protein …	-8.72253	-1.0736	0.000723337	0.0489342
175335	13.1.6.5	amino acid metabolism.synthesis.aromatic aa.tryptophan	|MERCATOR: (loc_os04g59520.1 : 99.8) no description available & (at1g22610 : 92.4) C2 calcium/lipid-binding plant phosphoribosyltransferase family protein; FUNCTIONS IN: molecular_function unknown; INVOLVED IN: biological_process unknown; LOCATED IN: chloroplast; EXPRESSED IN: 22 plant structures; EXPRESSED DURING: 13 growth stages; CONTAINS InterPro DOMAIN/s: C2 membrane targeting protein (Inter…	-8.96573	-0.824541	0.000415635	0.0366398
17907	16.1.1.2	secondary metabolism.isoprenoids.non-mevalonate pathway.DXR	|MERCATOR: (original description: no original description)||TAGI: TC415036;;Evalue=4E-80;%ident=94.42|MAPMANSTORE: moderately similar to ( 202) AT5G62790 ; Symbols: DXR, PDE129 ; DXR (1-DEOXY-D-XYLULOSE 5-PHOSPHATE REDUCTOISOMERASE); 1-deoxy-D-xylulose-5-phosphate reductoisomerase ; chr5:25214358-25217292 REVERSEmoderately similar to ( 258) DXR_ORYSA 1-deoxy-D-xylulose 5-phosphate reductoisomeras…	-3.16311	2.11661	4.66999e-06	0.00344136
51811	16.1.1.6	secondary metabolism.isoprenoids.non-mevalonate pathway.HDS	|MERCATOR: (original description: no original description)||TAGI: CJ923748;similar to UniRef100_Q672R6 Cluster: Hydroxymethylbutenyl 4-diphosphate synthase; n=1; Zea mays;Rep: Hydroxymethylbutenyl 4-diphosphate synthase - Zea mays (Maize), partial (3%);Evalue=0;%ident=98.51|MAPMANSTORE: similar to UniRef100_Q672R6 Cluster: Hydroxymethylbutenyl 4-diphosphate synthase; n=1; Zea mays;Rep: Hydroxymet…	-8.66408	-1.12339	0.000516211	0.0409905
53938	16.1.5	secondary metabolism.isoprenoids.terpenoids	|MERCATOR: (loc_os02g02930.1 : 97.8) no description available & (at1g61680 : 71.6) terpene synthase 14 (TPS14); CONTAINS InterPro DOMAIN/s: Terpene synthase, metal-binding domain (InterPro:IPR005630), Terpenoid synthase (InterPro:IPR008949), Terpenoid cylases/protein prenyltransferase alpha-alpha toroid (InterPro:IPR008930), Terpene synthase-like (InterPro:IPR001906); BEST Arabidopsis thaliana pr…	-4.34961	0.0288232	0.000256834	0.0282701
66143	16.1.5	secondary metabolism.isoprenoids.terpenoids	|MERCATOR: (at4g16740 : 190.0) Encodes an (E,E)-alpha-farnesene synthase in the Col ecotype of Arabidopsis. This enzyme can also catalyze the formation of (E)-beta-ocimene as well as trace amounts of myrcene and other related compounds in vitro. The cytosolic localization of the protein may make it favor (E,E)-alpha-farnesene biosynthesis because the precursor of this product, FPP, is primarily c…	-3.45605	4.13351	1.12201e-05	0.00536149
66586	16.1.5	secondary metabolism.isoprenoids.terpenoids	|MERCATOR: (loc_os02g02930.1 : 146.0) no description available & (at1g61680 : 95.1) terpene synthase 14 (TPS14); CONTAINS InterPro DOMAIN/s: Terpene synthase, metal-binding domain (InterPro:IPR005630), Terpenoid synthase (InterPro:IPR008949), Terpenoid cylases/protein prenyltransferase alpha-alpha toroid (InterPro:IPR008930), Terpene synthase-like (InterPro:IPR001906); BEST Arabidopsis thaliana p…	-3.99026	5.02394	6.08208e-09	7.32392e-05
203801	16.1.5	secondary metabolism.isoprenoids.terpenoids	|MERCATOR: (loc_os04g27340.1 : 558.0) no description available & (p93665|dcs1_goshi : 300.0) (+)-delta-cadinene synthase (EC 4.2.3.13) (D-cadinene synthase) - Gossypium hirsutum (Upland cotton) & (at4g16730 : 246.0) In the Col ecotype, no functional protein is encoded at this locus due to the presence of a two-base (AT) insertion 184 nucleotides downstream of the start codon leading to a frame sh…	-8.84969	0.849939	0.000248319	0.02779
70591	16.2.1.5	secondary metabolism.phenylpropanoids.lignin biosynthesis.C3H	|MERCATOR: (loc_os09g26960.1 : 213.0) no description available & (at2g45550 : 143.0) member of CYP76C; "cytochrome P450, family 76, subfamily C, polypeptide 4" (CYP76C4); FUNCTIONS IN: electron carrier activity, monooxygenase activity, iron ion binding, oxygen binding, heme binding; INVOLVED IN: oxidation reduction; EXPRESSED IN: stem, root, carpel; EXPRESSED DURING: 4 anthesis; CONTAINS InterPro…	-2.06926	4.01012	2.80885e-05	0.00943552
55844	16.2.1.10	secondary metabolism.phenylpropanoids.lignin biosynthesis.CAD	|MERCATOR: (loc_os04g15920.1 : 266.0) no description available & (at4g39330 : 186.0) cinnamyl alcohol dehydrogenase 9 (CAD9); FUNCTIONS IN: oxidoreductase activity, zinc ion binding; INVOLVED IN: oxidation reduction; LOCATED IN: apoplast; EXPRESSED IN: 25 plant structures; EXPRESSED DURING: 15 growth stages; CONTAINS InterPro DOMAIN/s: GroES-like (InterPro:IPR011032), Alcohol dehydrogenase GroES-…	-3.1665	-0.142315	5.03884e-05	0.0122332
69195	16.2.1.10	secondary metabolism.phenylpropanoids.lignin biosynthesis.CAD	|MERCATOR: (loc_os10g29470.1 : 563.0) no description available & (p93257|mtdh_mescr : 467.0) Probable mannitol dehydrogenase (EC 1.1.1.255) (NAD-dependent mannitol dehydrogenase) - Mesembryanthemum crystallinum (Common ice plant) & (at4g37990 : 446.0) Encodes an aromatic alcohol:NADP+ oxidoreductase whose mRNA levels are increased in response to treatment with a variety of phytopathogenic bacteri…	-2.11531	7.15438	3.16798e-06	0.00272487
53252	16.2	secondary metabolism.phenylpropanoids	|MERCATOR: (loc_os04g09590.1 : 471.0) no description available & (at3g62160 : 146.0) HXXXD-type acyl-transferase family protein; FUNCTIONS IN: transferase activity, transferring acyl groups other than amino-acyl groups, transferase activity; INVOLVED IN: biological_process unknown; LOCATED IN: cellular_component unknown; EXPRESSED IN: 22 plant structures; EXPRESSED DURING: 13 growth stages; CONTA…	-2.03741	3.4786	2.04186e-06	0.00211962
166830	16.2	secondary metabolism.phenylpropanoids	|MERCATOR: (loc_os09g31502.3 : 93.6) no description available & (at2g33600 : 84.7) NAD(P)-binding Rossmann-fold superfamily protein; FUNCTIONS IN: coenzyme binding, binding, cinnamoyl-CoA reductase activity, catalytic activity; INVOLVED IN: lignin biosynthetic process, cellular metabolic process, metabolic process; EXPRESSED IN: 21 plant structures; EXPRESSED DURING: 13 growth stages; CONTAINS In…	-9.07781	-0.7393	0.000512204	0.0408433
55920	16.4.1	secondary metabolism.N misc.alkaloid-like	|MERCATOR: (loc_os10g37899.1 : 332.0) no description available & (at4g16770 : 254.0) 2-oxoglutarate (2OG) and Fe(II)-dependent oxygenase superfamily protein; FUNCTIONS IN: oxidoreductase activity, acting on paired donors, with incorporation or reduction of molecular oxygen, 2-oxoglutarate as one donor, and incorporation of one atom each of oxygen into both donors, oxidoreductase activity, iron io…	-3.94219	1.25053	0.00066962	0.0473467
58953	16.5.1.1.1.6	secondary metabolism.sulfur-containing.glucosinolates.synthesis.aliphatic.CYP79F1/F2 monooxygenase	|MERCATOR: (loc_os03g37290.1 : 313.0) no description available & (q43135|c79a1_sorbi : 296.0) Cytochrome P450 79A1 (EC 1.14.13.41) (Tyrosine N-monooxygenase) (Cytochrome P450Tyr) - Sorghum bicolor (Sorghum) (Sorghum vulgare) & (at5g05260 : 264.0) Encodes cytochrome P450 CYP79A2.; cytochrome p450 79a2 (CYP79A2); CONTAINS InterPro DOMAIN/s: Cytochrome P450 (InterPro:IPR001128), Cytochrome P450, E-c…	-2.67701	5.68934	6.73472e-05	0.0147451
46708	16.5.1.1.1.7	secondary metabolism.sulfur-containing.glucosinolates.synthesis.aliphatic.CYP83A1 phenylacetaldoxime monooxygenase	|MERCATOR: (loc_os02g09200.1 : 169.0) no description available & (o81974|c71d8_soybn : 124.0) Cytochrome P450 71D8 (EC 1.14.-.-) (P450 CP7) - Glycine max (Soybean) & (at3g26310 : 109.0) putative cytochrome P450; "cytochrome P450, family 71, subfamily B, polypeptide 35" (CYP71B35); FUNCTIONS IN: electron carrier activity, monooxygenase activity, iron ion binding, oxygen binding, heme binding; INVO…	-4.5117	-0.654353	6.71579e-06	0.00396423
53672	16.8.3	secondary metabolism.flavonoids.dihydroflavonols	|MERCATOR: (loc_os03g03034.2 : 97.1) no description available & (at5g24530 : 89.0) Encodes a putative 2OG-Fe(II) oxygenase that is defense-associated but required for susceptibility to downy mildew.; DOWNY MILDEW RESISTANT 6 (DMR6); FUNCTIONS IN: oxidoreductase activity, acting on paired donors, with incorporation or reduction of molecular oxygen, 2-oxoglutarate as one donor, and incorporation of…	-2.86634	1.29931	1.4884e-06	0.00172337
58470	17.1.1.1.10	hormone metabolism.abscisic acid.synthesis-degradation.synthesis.9-cis-epoxycarotenoid dioxygenase	|MERCATOR: (loc_os03g44380.1 : 349.0) no description available & (at3g14440 : 293.0) Encodes 9-<i>cis</i>-epoxycarotenoid dioxygenase, a key enzyme in the biosynthesis of abscisic acid. Regulated in response to drought and salinity. Expressed in roots, flowers and seeds. Localized to the chloroplast stroma and thylakoid membrane.; nine-cis-epoxycarotenoid dioxygenase 3 (NCED3); CONTAINS InterPro …	-3.20031	-0.433225	9.7015e-05	0.0175824
55780	17.1.1	hormone metabolism.abscisic acid.synthesis-degradation	|MERCATOR: (q852m2|aldo3_orysa : 154.0) Probable aldehyde oxidase 3 (EC 1.2.3.1) (AO-3) - Oryza sativa (Rice) & (loc_os03g57680.1 : 154.0) no description available & (at1g04580 : 117.0) Encodes aldehyde oxidase AAO4 preferentially expressed in developing seeds.; aldehyde oxidase 4 (AO4); CONTAINS InterPro DOMAIN/s: Aldehyde oxidase/xanthine dehydrogenase (InterPro:IPR016208), Ferredoxin (InterPro…	-2.50102	0.653112	0.00045189	0.0382442
57298	17.3.2.1	hormone metabolism.brassinosteroid.signal transduction.BRI	|MERCATOR: (loc_os11g29790.1 : 95.9) no description available & (at2g34930 : 67.4) disease resistance family protein / LRR family protein; INVOLVED IN: signal transduction, defense response to fungus, defense response; LOCATED IN: cell wall; EXPRESSED IN: 10 plant structures; EXPRESSED DURING: 7 growth stages; CONTAINS InterPro DOMAIN/s: Leucine-rich repeat-containing N-terminal domain, type 2 (I…	-11.0093	1.11557	7.40759e-05	0.0156365
66399	17.3.2.99	hormone metabolism.brassinosteroid.signal transduction.other	|MERCATOR: (loc_os12g43640.1 : 104.0) no description available & (gnl|cdd|36433 : 51.2) no description available & (at2g13800 : 46.6) somatic embryogenesis receptor-like kinase 5 (SERK5); FUNCTIONS IN: protein kinase activity, transmembrane receptor protein serine/threonine kinase activity, ATP binding; INVOLVED IN: protein amino acid phosphorylation; LOCATED IN: endomembrane system; CONTAINS Int…	-2.26731	2.4199	0.000331965	0.0325854
46607	17.5.2	hormone metabolism.ethylene.signal transduction	|MERCATOR: (loc_os03g10810.1 : 178.0) no description available & (at4g37580 : 122.0) involved in apical hook development. putative N-acetyltransferase; HOOKLESS 1 (HLS1); CONTAINS InterPro DOMAIN/s: GCN5-related N-acetyltransferase, C-terminal (InterPro:IPR022610), GCN5-related N-acetyltransferase (InterPro:IPR000182), Acyl-CoA N-acyltransferase (InterPro:IPR016181); BEST Arabidopsis thaliana pro…	-5.95407	-1.02557	0.000132056	0.0202831
52730	17.6.1.13	hormone metabolism.gibberelin.synthesis-degradation.GA2 oxidase	|MERCATOR: (loc_os01g55240.1 : 106.0) no description available & (q9sq80|g2ox1_pea : 96.7) Gibberellin 2-beta-dioxygenase 1 (EC 1.14.11.13) (Gibberellin 2-beta-hydroxylase 1) (Gibberellin 2-oxidase 1) (GA 2-oxidase 1) (Protein SLENDER) - Pisum sativum (Garden pea) & (at1g30040 : 89.4) Encodes a gibberellin 2-oxidase that acts on C-19 gibberellins. AtGA2OX2 expression is responsive to cytokinin an…	-2.51848	0.63305	0.000347917	0.0335164
51307	17.7.1.2	hormone metabolism.jasmonate.synthesis-degradation.lipoxygenase	|MERCATOR: (p93184|lox21_horvu : 339.0) Lipoxygenase 2.1, chloroplast precursor (EC 1.13.11.12) (LOX-100) (LOX2:Hv:1) - Hordeum vulgare (Barley) & (loc_os02g10120.1 : 146.0) no description available & (at3g45140 : 92.0) Chloroplast lipoxygenase required for wound-induced jasmonic acid accumulation in Arabidopsis.Mutants are resistant to Staphylococcus aureus and accumulate salicylic acid upon inf…	-8.37043	1.34764	3.57617e-05	0.0105233
52618	17.7.1.4	hormone metabolism.jasmonate.synthesis-degradation.allene oxidase cyclase	|MERCATOR: (loc_os03g32314.1 : 329.0) no description available & (at1g13280 : 234.0) Encodes allene oxide cyclase. One of four genes in Arabidopsis that encode this enzyme, which catalyzes an essential step in jasmonic acid biosynthesis. Gene expression is reduced during senescence, a process that involves jasmonic acid signalling pathway.; allene oxide cyclase 4 (AOC4); FUNCTIONS IN: allene-oxid…	-2.65205	1.93079	5.88625e-06	0.00373058
53244	18.7	Co-factor and vitamine metabolism.iron-sulphur clusters	|MERCATOR: (original description: no original description)||TAGI: TC404235;weakly similar to UniRef100_A7PCQ2 Cluster: Chromosome chr17 scaffold_12, whole genome shotgun sequence; n=1; Vitis vinifera;Rep: Chromosome chr17 scaffold_12, whole genome shotgun sequence - Vitis vinifera (Grape), partial (7%);Evalue=1E-156;%ident=98.11|MAPMANSTORE: weakly similar to UniRef100_A7PCQ2 Cluster: Chromosome …	-2.8973	0.547389	0.000713183	0.0486297
52709	20.1.1	stress.biotic.respiratory burst	|MERCATOR: (loc_os09g26660.1 : 134.0) no description available & (at1g19230 : 119.0) Riboflavin synthase-like superfamily protein; FUNCTIONS IN: in 6 functions; INVOLVED IN: defense response; LOCATED IN: integral to membrane, membrane; EXPRESSED IN: 7 plant structures; EXPRESSED DURING: petal differentiation and expansion stage; CONTAINS InterPro DOMAIN/s: Ferredoxin reductase-type FAD-binding do…	-2.01623	2.1646	8.22336e-05	0.0163349
7442	20.1.2	stress.biotic.receptors	|MERCATOR: (loc_os04g53496.1 : 139.0) no description available & (gnl|cdd|38301 : 58.1) no description available & (at3g44670 : 46.6) Disease resistance protein (TIR-NBS-LRR class) family; FUNCTIONS IN: transmembrane receptor activity, nucleoside-triphosphatase activity, nucleotide binding, ATP binding; INVOLVED IN: defense response to bacterium, defense response; LOCATED IN: intrinsic to membran…	-9.93642	0.0663813	0.000116161	0.0193092
39221	20.1.2	stress.biotic.receptors	|MERCATOR: (loc_os11g10760.1 : 71.2) no description available & (gnl|cdd|38301 : 53.9) no description available & (at5g66910 : 46.2) Disease resistance protein (CC-NBS-LRR class) family; FUNCTIONS IN: ATP binding; INVOLVED IN: defense response, apoptosis; LOCATED IN: endomembrane system; CONTAINS InterPro DOMAIN/s: NB-ARC (InterPro:IPR002182), Leucine-rich repeat (InterPro:IPR001611), Powdery mil…	-9.16613	-0.664772	0.000367074	0.0346414
690	20.1.7	stress.biotic.PR-proteins	|MERCATOR: (loc_os08g28540.1 : 145.0) no description available & (at5g17680 : 57.4) disease resistance protein (TIR-NBS-LRR class), putative; FUNCTIONS IN: transmembrane receptor activity, ATP binding; INVOLVED IN: signal transduction, defense response, apoptosis, innate immune response; LOCATED IN: intrinsic to membrane; EXPRESSED IN: 14 plant structures; EXPRESSED DURING: 6 growth stages; CONTA…	-9.55352	-0.294055	0.000352417	0.0337877
7220	20.1.7	stress.biotic.PR-proteins	|MERCATOR: (loc_os11g10570.1 : 97.4) no description available & (at2g14080 : 63.9) Disease resistance protein (TIR-NBS-LRR class) family; FUNCTIONS IN: transmembrane receptor activity, nucleoside-triphosphatase activity, nucleotide binding, ATP binding; INVOLVED IN: signal transduction, apoptosis, defense response, innate immune response; LOCATED IN: intrinsic to membrane, endomembrane system; EX…	-8.8149	-0.991001	0.000638227	0.0460755
35077	20.1.7	stress.biotic.PR-proteins	|MERCATOR: (loc_os05g40160.1 : 96.7) no description available & (gnl|cdd|36433 : 45.8) no description available & (at3g46730 : 42.4) NB-ARC domain-containing disease resistance protein; FUNCTIONS IN: ATP binding; INVOLVED IN: defense response, apoptosis; LOCATED IN: endomembrane system; CONTAINS InterPro DOMAIN/s: NB-ARC (InterPro:IPR002182), Disease resistance protein (InterPro:IPR000767); BEST …	-9.39621	-0.455515	0.000297846	0.0305503
35669	20.1.7	stress.biotic.PR-proteins	|MERCATOR: (loc_os11g11580.1 : 109.0) no description available & (gnl|cdd|36433 : 54.3) no description available & (at1g50180 : 49.7) NB-ARC domain-containing disease resistance protein; FUNCTIONS IN: ATP binding; INVOLVED IN: apoptosis, defense response; LOCATED IN: cellular_component unknown; EXPRESSED IN: shoot; CONTAINS InterPro DOMAIN/s: NB-ARC (InterPro:IPR002182), Disease resistance protei…	-8.60781	-1.1729	0.000559609	0.0427583
40025	20.1.7	stress.biotic.PR-proteins	|MERCATOR: (loc_os11g10760.1 : 197.0) no description available & (at3g14460 : 61.6) LRR and NB-ARC domains-containing disease resistance protein; FUNCTIONS IN: ATP binding; INVOLVED IN: apoptosis, defense response; CONTAINS InterPro DOMAIN/s: NB-ARC (InterPro:IPR002182), Leucine-rich repeat (InterPro:IPR001611), Disease resistance protein (InterPro:IPR000767); BEST Arabidopsis thaliana protein ma…	-10.52	0.633227	9.8995e-05	0.0176343
41712	20.1.7	stress.biotic.PR-proteins	|MERCATOR: (loc_os08g19980.1 : 1060.0) no description available & (at3g14470 : 325.0) NB-ARC domain-containing disease resistance protein; FUNCTIONS IN: protein binding; INVOLVED IN: apoptosis, defense response; LOCATED IN: endomembrane system; EXPRESSED IN: 23 plant structures; EXPRESSED DURING: 14 growth stages; CONTAINS InterPro DOMAIN/s: Leucine-rich repeat-containing protein (InterPro:IPR015…	-10.8956	2.89116	1.27053e-05	0.00583964
43539	20.1.7	stress.biotic.PR-proteins	|MERCATOR: (loc_os11g10770.1 : 103.0) no description available & (at3g50950 : 57.8) HOPZ-ACTIVATED RESISTANCE 1 (ZAR1); FUNCTIONS IN: ATP binding; INVOLVED IN: defense response, apoptosis; LOCATED IN: cellular_component unknown; EXPRESSED IN: 22 plant structures; EXPRESSED DURING: 13 growth stages; CONTAINS InterPro DOMAIN/s: NB-ARC (InterPro:IPR002182), Disease resistance protein (InterPro:IPR00…	-9.38955	-0.461783	0.000302077	0.0306005
44654	20.1.7	stress.biotic.PR-proteins	|MERCATOR: (loc_os01g33810.1 : 95.1) no description available & (at5g44510 : 40.4) Encodes TAO1 (Target of AvrB Operation), a TIR-NB-LRR protein that contributes to disease resistance induced by the Pseudomonas syringae effector AvrB.; target of AVRB operation1 (TAO1); FUNCTIONS IN: transmembrane receptor activity, ATP binding; INVOLVED IN: defense response to bacterium, defense response; LOCATED…	-7.60154	-0.255098	0.000239757	0.0273435
45052	20.1.7	stress.biotic.PR-proteins	|MERCATOR: (loc_os11g44960.1 : 103.0) no description available & (gnl|cdd|36433 : 52.7) no description available & (at3g14470 : 49.7) NB-ARC domain-containing disease resistance protein; FUNCTIONS IN: protein binding; INVOLVED IN: apoptosis, defense response; LOCATED IN: endomembrane system; EXPRESSED IN: 23 plant structures; EXPRESSED DURING: 14 growth stages; CONTAINS InterPro DOMAIN/s: Leucine…	-8.03509	-1.6472	0.000581543	0.0438153
45817	20.1.7	stress.biotic.PR-proteins	|MERCATOR: (loc_os11g44580.1 : 102.0) no description available & (at3g14470 : 57.4) NB-ARC domain-containing disease resistance protein; FUNCTIONS IN: protein binding; INVOLVED IN: apoptosis, defense response; LOCATED IN: endomembrane system; EXPRESSED IN: 23 plant structures; EXPRESSED DURING: 14 growth stages; CONTAINS InterPro DOMAIN/s: Leucine-rich repeat-containing protein (InterPro:IPR01576…	-8.24303	-1.47089	8.53553e-05	0.0165484
47406	20.1.7	stress.biotic.PR-proteins	|MERCATOR: (loc_os11g10760.1 : 87.8) no description available & (at1g69550 : 55.5) disease resistance protein (TIR-NBS-LRR class); FUNCTIONS IN: transmembrane receptor activity, nucleoside-triphosphatase activity, nucleotide binding, ATP binding; INVOLVED IN: signal transduction, defense response, apoptosis, innate immune response; LOCATED IN: intrinsic to membrane, endomembrane system; EXPRESSED…	-10.4704	0.581665	0.000112119	0.0188563
48917	20.1.7	stress.biotic.PR-proteins	|MERCATOR: (loc_os02g18080.1 : 144.0) no description available & (at3g14470 : 87.8) NB-ARC domain-containing disease resistance protein; FUNCTIONS IN: protein binding; INVOLVED IN: apoptosis, defense response; LOCATED IN: endomembrane system; EXPRESSED IN: 23 plant structures; EXPRESSED DURING: 14 growth stages; CONTAINS InterPro DOMAIN/s: Leucine-rich repeat-containing protein (InterPro:IPR01576…	-6.37511	1.42665	8.26856e-05	0.0163349
49378	20.1.7	stress.biotic.PR-proteins	|MERCATOR: (loc_os02g16110.1 : 302.0) no description available & (at1g69550 : 65.1) disease resistance protein (TIR-NBS-LRR class); FUNCTIONS IN: transmembrane receptor activity, nucleoside-triphosphatase activity, nucleotide binding, ATP binding; INVOLVED IN: signal transduction, defense response, apoptosis, innate immune response; LOCATED IN: intrinsic to membrane, endomembrane system; EXPRESSE…	-9.40559	3.42822	5.87979e-06	0.00373058
56585	20.1.7	stress.biotic.PR-proteins	|MERCATOR: (loc_os06g03500.1 : 137.0) no description available & (at3g46730 : 58.2) NB-ARC domain-containing disease resistance protein; FUNCTIONS IN: ATP binding; INVOLVED IN: defense response, apoptosis; LOCATED IN: endomembrane system; CONTAINS InterPro DOMAIN/s: NB-ARC (InterPro:IPR002182), Disease resistance protein (InterPro:IPR000767); BEST Arabidopsis thaliana protein match is: NB-ARC dom…	-8.71168	-1.02467	0.000441807	0.037964
57328	20.1.7	stress.biotic.PR-proteins	|MERCATOR: (loc_os04g53000.1 : 146.0) no description available & (gnl|cdd|36433 : 46.9) no description available & (gnl|cdd|33637 : 43.8) no description available & (at3g25510 : 43.5) disease resistance protein (TIR-NBS-LRR class), putative; FUNCTIONS IN: transmembrane receptor activity, nucleoside-triphosphatase activity, nucleotide binding, ATP binding; INVOLVED IN: signal transduction, defense…	-11.9127	2.01541	2.49866e-07	0.000752211
69146	20.1.7	stress.biotic.PR-proteins	|MERCATOR: (at3g11010 : 89.7) receptor like protein 34 (RLP34); CONTAINS InterPro DOMAIN/s: Leucine-rich repeat, typical subtype (InterPro:IPR003591), Leucine-rich repeat-containing N-terminal domain, type 2 (InterPro:IPR013210), Leucine-rich repeat (InterPro:IPR001611); BEST Arabidopsis thaliana protein match is: receptor like protein 53 (TAIR:AT5G27060.1); Has 142392 Blast hits to 33789 protein…	-7.52223	3.93327	1.31979e-06	0.0016023
1681	20.1	stress.biotic	|MERCATOR: (original description: no original description)||TAGI: BJ270447;similar to UniRef100_Q0ITD6 Cluster: Os11g0266500 protein; n=1; Oryza sativa Japonica Group;Rep: Os11g0266500 protein - Oryza sativa subsp. japonica (Rice), partial (5%);Evalue=0.00000000000002;%ident=90.48|MAPMANSTORE: weakly similar to ( 134) loc_os11g16470 12011.m079976 protein MLA10, putative, expressed similar to UniR…	-9.07589	-0.722585	3.84196e-05	0.0106594
2141	20.1	stress.biotic	|MERCATOR: (loc_os06g17880.1 : 113.0) no description available & (at3g07040 : 57.4) Contains an N-terminal tripartite nucleotide binding site and a C-terminal tandem array of leucine-rich repeats. Confers resistance to Pseudomonas syringae strains that carry the avirulence genes avrB and avrRpm1.; RESISTANCE TO P. SYRINGAE PV MACULICOLA 1 (RPM1); FUNCTIONS IN: protein binding, nucleotide binding;…	-8.48818	-1.27695	0.000302401	0.0306005
2985	20.1	stress.biotic	|MERCATOR: (original description: no original description)||BRACHYPODIUM GENOME: Bradi3g61040.1 ; weakly similar to ( 187) AT3G14460 | Symbols: | disease resistance protein (NBS-LRR class), putative | chr3:4851990-4856264 REVERSEhighly similar to ( 607) loc_os06g16790 12006.m06392 protein cyst nematode resistance protein, putative, expressed NB-ARC no original description||RICE GENOME: Loc_Os11g4…	-7.57148	-2.02497	0.000729137	0.0491058
7609	20.1	stress.biotic	|MERCATOR: (original description: no original description)||BRACHYPODIUM GENOME: Bradi3g61040.1 ; weakly similar to ( 187) AT3G14460 | Symbols: | disease resistance protein (NBS-LRR class), putative | chr3:4851990-4856264 REVERSEhighly similar to ( 607) loc_os06g16790 12006.m06392 protein cyst nematode resistance protein, putative, expressed NB-ARC no original description||RICE GENOME: Loc_Os11g4…	-8.28567	-1.40716	2.03996e-05	0.00777365
7638	20.1	stress.biotic	|MERCATOR: (original description: no original description)||BREAD.WHEAT.TIGR: CJ736229; Phosphoglycerate kinase, chloroplast precursor [Triticum aestivum (Wheat)]; Evalue=7E-171; %ident=100||BRACHYPODIUM GENOME: Bradi1g50407.2 ; moderately similar to ( 251) AT3G07040 | Symbols: RPM1, RPS3 | RPM1 (RESISTANCE TO P. SYRINGAE PV MACULICOLA 1); nucleotide binding / protein binding | chr3:2226244-22290…	-7.3294	0.200255	0.000458893	0.0385047
9938	20.1	stress.biotic	|MERCATOR: (original description: no original description)||BRACHYPODIUM GENOME: Bradi3g60446.1 ; weakly similar to ( 194) AT3G46530 | Symbols: RPP13 | RPP13 (RECOGNITION OF PERONOSPORA PARASITICA 13); ATP binding | chr3:17130739-17133246 REVERSEhighly similar to ( 787) loc_os08g28540 12008.m06860 protein resistance protein LR10, putative NB-ARC no original description||RICE GENOME: Loc_Os08g2857…	-6.56234	-1.29092	0.000396457	0.0360514
10175	20.1	stress.biotic	|MERCATOR: (loc_os05g40150.1 : 104.0) no description available & (at3g50950 : 63.5) HOPZ-ACTIVATED RESISTANCE 1 (ZAR1); FUNCTIONS IN: ATP binding; INVOLVED IN: defense response, apoptosis; LOCATED IN: cellular_component unknown; EXPRESSED IN: 22 plant structures; EXPRESSED DURING: 13 growth stages; CONTAINS InterPro DOMAIN/s: NB-ARC (InterPro:IPR002182), Disease resistance protein (InterPro:IPR00…	-7.48556	-2.02695	0.000270867	0.0288687
14769	20.1	stress.biotic	|MERCATOR: (loc_os02g27310.1 : 204.0) no description available & (p35793|pr13_horvu : 146.0) Pathogenesis-related protein PRB1-3 precursor (PR-1B) (HV-8) - Hordeum vulgare (Barley) & (at4g30320 : 137.0) CAP (Cysteine-rich secretory proteins, Antigen 5, and Pathogenesis-related 1 protein) superfamily protein; FUNCTIONS IN: molecular_function unknown; INVOLVED IN: biological_process unknown; LOCATE…	-3.15272	-1.18103	0.000444391	0.0380602
20594	20.1	stress.biotic	|MERCATOR: (loc_os11g45840.1 : 302.0) no description available & (gnl|cdd|36433 : 52.0) no description available & (at4g13820 : 43.9) Leucine-rich repeat (LRR) family protein; FUNCTIONS IN: kinase activity; INVOLVED IN: signal transduction; LOCATED IN: endomembrane system; EXPRESSED IN: stem, leaf whorl, hypocotyl, root, leaf; EXPRESSED DURING: LP.06 six leaves visible; CONTAINS InterPro DOMAIN/s…	-7.24198	1.00596	1.3323e-05	0.00594198
25713	20.1	stress.biotic	|MERCATOR: (original description: no original description)||TAGI: TC416134;weakly similar to UniRef100_Q0E209 Cluster: Os02g0282500 protein; n=1; Oryza sativa Japonica Group;Rep: Os02g0282500 protein - Oryza sativa subsp. japonica (Rice), partial (8%);Evalue=2E-102;%ident=100|MAPMANSTORE: weakly similar to ( 168) loc_os02g18080 12002.m07052 protein NB-ARC domain containing protein, expressed weak…	-8.78469	-0.979042	0.000553634	0.0426262
28424	20.1	stress.biotic	|MERCATOR: (original description: no original description)||BRACHYPODIUM GENOME: Bradi1g50407.2 ; moderately similar to ( 251) AT3G07040 | Symbols: RPM1, RPS3 | RPM1 (RESISTANCE TO P. SYRINGAE PV MACULICOLA 1); nucleotide binding / protein binding | chr3:2226244-2229024 REVERSEnearly identical (1040) loc_os06g17880 12006.m06500 protein disease resistance RPP13-like protein 3, putative, expressed …	-10.212	0.327102	2.66378e-08	0.000178204
29255	20.1	stress.biotic	|MERCATOR: (loc_os01g41890.1 : 88.6) no description available & (at3g46730 : 54.3) NB-ARC domain-containing disease resistance protein; FUNCTIONS IN: ATP binding; INVOLVED IN: defense response, apoptosis; LOCATED IN: endomembrane system; CONTAINS InterPro DOMAIN/s: NB-ARC (InterPro:IPR002182), Disease resistance protein (InterPro:IPR000767); BEST Arabidopsis thaliana protein match is: NB-ARC doma…	-9.25821	-0.57666	2.33356e-06	0.00238138
29809	20.1	stress.biotic	|MERCATOR: (original description: no original description)||BRACHYPODIUM GENOME: Bradi1g50420.1 ; weakly similar to ( 138) AT3G46530 | Symbols: RPP13 | RPP13 (RECOGNITION OF PERONOSPORA PARASITICA 13); ATP binding | chr3:17130739-17133246 REVERSEmoderately similar to ( 448) loc_os06g17880 12006.m06500 protein disease resistance RPP13-like protein 3, putative, expressed NB-ARC no original descript…	-7.90346	-1.73636	0.000434796	0.0377448
30541	20.1	stress.biotic	|MERCATOR: (original description: no original description)||TAGI: DR732849;;Evalue=3E-113;%ident=86.28|MAPMANSTORE: weakly similar to ( 105) loc_os10g03570 12010.m03774 protein RGH1A, putative||BREAD.WHEAT.TIGR: DR732849; DR732849; Evalue=4E-113; %ident=86.28||BRACHYPODIUM GENOME: Bradi2g39390.1 ; moderately similar to ( 295) loc_os08g07330 12008.m26591 protein RGH1A, putative, expressed no origi…	-9.14004	-0.697024	2.48115e-06	0.0023829
31144	20.1	stress.biotic	|MERCATOR: (loc_os06g17930.1 : 129.0) no description available & (at5g43470 : 46.6) Confers resistance to Peronospora parasitica. In arabidopsis ecotype Dijon-17, HRT-mediated signaling is dependent on light for the induction of hypersensitive response and resistance to turnip crinkle virus.; RECOGNITION OF PERONOSPORA PARASITICA 8 (RPP8); FUNCTIONS IN: nucleotide binding; INVOLVED IN: defense re…	-8.42407	-1.28739	0.000336199	0.0327544
31353	20.1	stress.biotic	|MERCATOR: (original description: no original description)||TAGI: DR733061;weakly similar to UniRef100_Q0DCV0 Cluster: Os06g0287000 protein; n=1; Oryza sativa Japonica Group;Rep: Os06g0287000 protein - Oryza sativa subsp. japonica (Rice), partial (11%);Evalue=2E-24;%ident=100|MAPMANSTORE: weakly similar to ( 147) loc_os06g17920 12006.m06504 protein disease resistance RPP8-like protein 3, putative…	-8.73332	-0.913219	0.000137254	0.020557
33383	20.1	stress.biotic	|MERCATOR: (original description: no original description)||BRACHYPODIUM GENOME: Bradi3g10370.1 ; moderately similar to ( 216) AT3G14470 | Symbols: | disease resistance protein (NBS-LRR class), putative | chr3:4857940-4861104 FORWARDhighly similar to ( 602) loc_os02g18080 12002.m07052 protein NB-ARC domain containing protein, expressed NB-ARC no original description||RICE GENOME: Loc_Os02g18000.1…	-8.95102	0.956274	0.000250911	0.0278729
34753	20.1	stress.biotic	|MERCATOR: (loc_os11g35210.1 : 144.0) no description available & (gnl|cdd|38301 : 43.5) no description available & (at3g04220 : 43.1) Disease resistance protein (TIR-NBS-LRR class) family; FUNCTIONS IN: transmembrane receptor activity, nucleoside-triphosphatase activity, nucleotide binding, ATP binding; INVOLVED IN: signal transduction, defense response, apoptosis, innate immune response; LOCATED…	-4.97717	-0.998094	0.000383361	0.0354015
35796	20.1	stress.biotic	|MERCATOR: (loc_os12g37740.1 : 277.0) no description available & (at3g07040 : 108.0) Contains an N-terminal tripartite nucleotide binding site and a C-terminal tandem array of leucine-rich repeats. Confers resistance to Pseudomonas syringae strains that carry the avirulence genes avrB and avrRpm1.; RESISTANCE TO P. SYRINGAE PV MACULICOLA 1 (RPM1); FUNCTIONS IN: protein binding, nucleotide binding…	-9.91525	0.0400625	0.00017666	0.0234802
37483	20.1	stress.biotic	|MERCATOR: (loc_os07g03000.1 : 89.4) no description available & (at5g20480 : 82.8) Encodes a predicted leucine-rich repeat receptor kinase (LRR-RLK). Functions as the receptor for bacterial PAMP (pathogen associated molecular patterns) EF-Tu.; EF-TU receptor (EFR); FUNCTIONS IN: protein serine/threonine kinase activity, transmembrane receptor protein kinase activity, kinase activity, ATP binding;…	-7.57284	-0.371841	0.000535398	0.0418646
38507	20.1	stress.biotic	|MERCATOR: (loc_os01g25760.1 : 137.0) no description available & (at4g19520 : 51.2) disease resistance protein (TIR-NBS-LRR class) family; FUNCTIONS IN: transmembrane receptor activity, ATP binding; INVOLVED IN: signal transduction, apoptosis, defense response, innate immune response; LOCATED IN: intrinsic to membrane; CONTAINS InterPro DOMAIN/s: NB-ARC (InterPro:IPR002182), Leucine-rich repeat (…	-9.22422	-0.567585	0.000122077	0.0196004
38857	20.1	stress.biotic	|MERCATOR: (loc_os12g10710.1 : 483.0) no description available & (at3g14460 : 156.0) LRR and NB-ARC domains-containing disease resistance protein; FUNCTIONS IN: ATP binding; INVOLVED IN: apoptosis, defense response; CONTAINS InterPro DOMAIN/s: NB-ARC (InterPro:IPR002182), Leucine-rich repeat (InterPro:IPR001611), Disease resistance protein (InterPro:IPR000767); BEST Arabidopsis thaliana protein m…	-10.1541	0.271902	0.000142935	0.0210539
40093	20.1	stress.biotic	|MERCATOR: (original description: no original description)||BRACHYPODIUM GENOME: Bradi3g60337.1 ; moderately similar to ( 270) AT3G14470 | Symbols: | disease resistance protein (NBS-LRR class), putative | chr3:4857940-4861104 FORWARDnearly identical (1335) loc_os02g16270 12002.m100165 protein xa1-like protein, putative, expressed NB-ARC no original description||RICE GENOME: Loc_Os01g02250.1 ; 120…	-8.9836	-0.83823	0.000499982	0.0403701
40955	20.1	stress.biotic	|MERCATOR: (loc_os09g30220.1 : 100.0) no description available & (at3g07040 : 64.3) Contains an N-terminal tripartite nucleotide binding site and a C-terminal tandem array of leucine-rich repeats. Confers resistance to Pseudomonas syringae strains that carry the avirulence genes avrB and avrRpm1.; RESISTANCE TO P. SYRINGAE PV MACULICOLA 1 (RPM1); FUNCTIONS IN: protein binding, nucleotide binding;…	-11.2719	1.37513	4.00934e-05	0.010825
41794	20.1	stress.biotic	|MERCATOR: (original description: no original description)||TAGI: CA598476;UniRef100_Q9ATQ8 Cluster: LRR19; n=1; Triticum aestivum;Rep: LRR19 - Triticum aestivum (Wheat), partial (12%);Evalue=9E-144;%ident=93.82|MAPMANSTORE: very weakly similar to (88.6) loc_os01g36640 12001.m09959 protein disease resistance protein RPM1, putative, expressed UniRef100_Q9ATQ8 Cluster: LRR19; n=1; Triticum aestivum…	-8.89808	0.885773	0.000173371	0.0232327
42126	20.1	stress.biotic	|MERCATOR: (original description: no original description)||TAGI: CJ899922;homologue to UniRef100_Q9ATQ8 Cluster: LRR19; n=1; Triticum aestivum;Rep: LRR19 - Triticum aestivum (Wheat), partial (11%);Evalue=5E-40;%ident=76.79|MAPMANSTORE: weakly similar to ( 136) loc_os01g36640 12001.m09959 protein disease resistance protein RPM1, putative, expressed homologue to UniRef100_Q9ATQ8 Cluster: LRR19; n=…	-9.78152	1.77869	9.93624e-05	0.0176475
45219	20.1	stress.biotic	|MERCATOR: (loc_os01g06790.1 : 370.0) no description available & (at3g05660 : 214.0) receptor like protein 33 (RLP33); FUNCTIONS IN: kinase activity; INVOLVED IN: signal transduction, defense response; LOCATED IN: chloroplast; EXPRESSED IN: 10 plant structures; EXPRESSED DURING: 10 growth stages; CONTAINS InterPro DOMAIN/s: Leucine-rich repeat, typical subtype (InterPro:IPR003591), Leucine-rich r…	-10.7286	0.846278	2.79888e-05	0.00943552
45993	20.1	stress.biotic	|MERCATOR: (original description: no original description)||TAGI: BQ620263;similar to UniRef100_A8JAZ9 Cluster: Predicted protein; n=1; Chlamydomonas reinhardtii;Rep: Predicted protein - Chlamydomonas reinhardtii, partial (8%);Evalue=0;%ident=100|MAPMANSTORE: similar to UniRef100_A8JAZ9 Cluster: Predicted protein; n=1; Chlamydomonas reinhardtii;Rep: Predicted protein - Chlamydomonas reinhardtii, …	-9.73059	1.71731	1.30354e-05	0.00585709
46405	20.1	stress.biotic	|MERCATOR: (original description: no original description)||TAGI: CK166779;weakly similar to UniRef100_Q0DCV0 Cluster: Os06g0287000 protein; n=1; Oryza sativa Japonica Group;Rep: Os06g0287000 protein - Oryza sativa subsp. japonica (Rice), partial (13%);Evalue=0;%ident=98.98|MAPMANSTORE: weakly similar to ( 161) loc_os06g17920 12006.m06504 protein disease resistance RPP8-like protein 3, putative w…	-8.70286	0.69619	0.00028532	0.0298762
46878	20.1	stress.biotic	|MERCATOR: (loc_os11g34970.1 : 115.0) no description available & (gnl|cdd|36433 : 41.9) no description available & (at5g43470 : 40.4) Confers resistance to Peronospora parasitica. In arabidopsis ecotype Dijon-17, HRT-mediated signaling is dependent on light for the induction of hypersensitive response and resistance to turnip crinkle virus.; RECOGNITION OF PERONOSPORA PARASITICA 8 (RPP8); FUNCTIO…	-9.32251	-0.522445	0.000120854	0.019508
47359	20.1	stress.biotic	|MERCATOR: (loc_os08g42930.1 : 149.0) no description available & (at3g14470 : 85.5) NB-ARC domain-containing disease resistance protein; FUNCTIONS IN: protein binding; INVOLVED IN: apoptosis, defense response; LOCATED IN: endomembrane system; EXPRESSED IN: 23 plant structures; EXPRESSED DURING: 14 growth stages; CONTAINS InterPro DOMAIN/s: Leucine-rich repeat-containing protein (InterPro:IPR01576…	-9.31417	-0.532522	0.000327889	0.0324702
48673	20.1	stress.biotic	|MERCATOR: (loc_os01g41750.1 : 177.0) no description available & (at1g75640 : 91.3) Leucine-rich receptor-like protein kinase family protein; FUNCTIONS IN: protein serine/threonine kinase activity, kinase activity, ATP binding; INVOLVED IN: transmembrane receptor protein tyrosine kinase signaling pathway, protein amino acid phosphorylation; LOCATED IN: plasma membrane; EXPRESSED IN: 18 plant stru…	-9.42906	-0.424563	0.000288553	0.030006
49317	20.1	stress.biotic	|MERCATOR: (original description: no original description)||BRACHYPODIUM GENOME: Bradi3g60337.1 ; moderately similar to ( 270) AT3G14470 | Symbols: | disease resistance protein (NBS-LRR class), putative | chr3:4857940-4861104 FORWARDnearly identical (1335) loc_os02g16270 12002.m100165 protein xa1-like protein, putative, expressed NB-ARC no original description||RICE GENOME: Loc_Os02g16260.1 ; 120…	-7.94299	1.27107	0.000300735	0.0306005
49587	20.1	stress.biotic	|MERCATOR: (original description: no original description)||BRACHYPODIUM GENOME: Bradi1g50407.2 ; moderately similar to ( 251) AT3G07040 | Symbols: RPM1, RPS3 | RPM1 (RESISTANCE TO P. SYRINGAE PV MACULICOLA 1); nucleotide binding / protein binding | chr3:2226244-2229024 REVERSEnearly identical (1040) loc_os06g17880 12006.m06500 protein disease resistance RPP13-like protein 3, putative, expressed …	-10.4929	0.604462	3.718e-05	0.0105233
50371	20.1	stress.biotic	|MERCATOR: (original description: no original description)||TAGI: CD876018;;Evalue=0;%ident=99.13|MAPMANSTORE: 0||BREAD.WHEAT.TIGR: CD876018; CD876018; Evalue=0; %ident=99.13||BRACHYPODIUM GENOME: Bradi3g34967.1 ; moderately similar to ( 359) loc_os11g11790 12011.m05371 protein expressed protein no original description||RICE GENOME: Loc_Os11g11790.1 ; 12011.m05371 protein expressed protein|	-11.5499	1.65803	1.22232e-07	0.000459968
53987	20.1	stress.biotic	|MERCATOR: (loc_os10g21400.1 : 113.0) no description available & (at5g35450 : 56.2) Disease resistance protein (CC-NBS-LRR class) family; FUNCTIONS IN: ATP binding; INVOLVED IN: defense response, apoptosis; LOCATED IN: plasma membrane; EXPRESSED IN: 21 plant structures; EXPRESSED DURING: 10 growth stages; CONTAINS InterPro DOMAIN/s: NB-ARC (InterPro:IPR002182), Disease resistance protein (InterPr…	-9.06543	3.88676	5.60053e-06	0.00366524
54337	20.1	stress.biotic	|MERCATOR: (loc_os06g17920.1 : 131.0) no description available & (gnl|cdd|38301 : 48.1) no description available & (at3g07040 : 45.8) Contains an N-terminal tripartite nucleotide binding site and a C-terminal tandem array of leucine-rich repeats. Confers resistance to Pseudomonas syringae strains that carry the avirulence genes avrB and avrRpm1.; RESISTANCE TO P. SYRINGAE PV MACULICOLA 1 (RPM1); …	-8.76238	2.50066	3.49261e-07	0.00083053
54400	20.1	stress.biotic	|MERCATOR: (loc_os11g34880.1 : 89.7) no description available & (at3g46730 : 61.6) NB-ARC domain-containing disease resistance protein; FUNCTIONS IN: ATP binding; INVOLVED IN: defense response, apoptosis; LOCATED IN: endomembrane system; CONTAINS InterPro DOMAIN/s: NB-ARC (InterPro:IPR002182), Disease resistance protein (InterPro:IPR000767); BEST Arabidopsis thaliana protein match is: NB-ARC doma…	-9.89288	3.62366	2.81208e-10	1.69313e-05
55293	20.1	stress.biotic	|MERCATOR: (loc_os01g36640.1 : 164.0) no description available & (at1g58400 : 62.8) Disease resistance protein (CC-NBS-LRR class) family; FUNCTIONS IN: ATP binding; INVOLVED IN: defense response, apoptosis; LOCATED IN: cellular_component unknown; CONTAINS InterPro DOMAIN/s: NB-ARC (InterPro:IPR002182), Disease resistance protein (InterPro:IPR000767); BEST Arabidopsis thaliana protein match is: Di…	-9.05433	1.14967	0.000204125	0.0251534
55778	20.1	stress.biotic	|MERCATOR: (loc_os08g16460.1 : 273.0) no description available & (at3g14470 : 159.0) NB-ARC domain-containing disease resistance protein; FUNCTIONS IN: protein binding; INVOLVED IN: apoptosis, defense response; LOCATED IN: endomembrane system; EXPRESSED IN: 23 plant structures; EXPRESSED DURING: 14 growth stages; CONTAINS InterPro DOMAIN/s: Leucine-rich repeat-containing protein (InterPro:IPR0157…	-11.8733	1.97543	1.00786e-05	0.00489373
56920	20.1	stress.biotic	|MERCATOR: (original description: no original description)||TAGI: CA681703;weakly similar to UniRef100_A9UKM3 Cluster: NBS-LRR resistance-like protein; n=1; Hordeum vulgare;Rep: NBS-LRR resistance-like protein - Hordeum vulgare (Barley), partial (7%);Evalue=9E-107;%ident=100|MAPMANSTORE: weakly similar to UniRef100_A9UKM3 Cluster: NBS-LRR resistance-like protein; n=1; Hordeum vulgare;Rep: NBS-LRR…	-4.04108	1.16781	8.64655e-07	0.00137
58111	20.1	stress.biotic	|MERCATOR: (original description: no original description)||TAGI: GH732810;;Evalue=6E-176;%ident=93.92|MAPMANSTORE: 0||BREAD.WHEAT.TIGR: BQ905461; BQ905461; Evalue=2E-82; %ident=96.28||BRACHYPODIUM GENOME: Bradi3g07780.1 ; moderately similar to ( 417) loc_os08g14850 12008.m05608 protein resistance protein, putative, expressed no original description||RICE GENOME: Loc_Os06g37810.1 ; 12006.m08316 p…	-4.48303	-0.404654	0.000671973	0.047348
59480	20.1	stress.biotic	|MERCATOR: (loc_os09g30220.1 : 313.0) no description available & (at3g07040 : 121.0) Contains an N-terminal tripartite nucleotide binding site and a C-terminal tandem array of leucine-rich repeats. Confers resistance to Pseudomonas syringae strains that carry the avirulence genes avrB and avrRpm1.; RESISTANCE TO P. SYRINGAE PV MACULICOLA 1 (RPM1); FUNCTIONS IN: protein binding, nucleotide binding…	-11.5833	3.56109	2.59017e-05	0.00897965
60041	20.1	stress.biotic	|MERCATOR: (loc_os11g39550.1 : 161.0) no description available & (gnl|cdd|36433 : 52.7) no description available & (at3g07040 : 50.1) Contains an N-terminal tripartite nucleotide binding site and a C-terminal tandem array of leucine-rich repeats. Confers resistance to Pseudomonas syringae strains that carry the avirulence genes avrB and avrRpm1.; RESISTANCE TO P. SYRINGAE PV MACULICOLA 1 (RPM1); …	-9.96084	0.0968238	0.000109793	0.0187787
61125	20.1	stress.biotic	|MERCATOR: (loc_os10g22510.1 : 182.0) no description available & (at1g53350 : 47.8) Disease resistance protein (CC-NBS-LRR class) family; FUNCTIONS IN: ATP binding; INVOLVED IN: apoptosis, defense response; EXPRESSED IN: 19 plant structures; EXPRESSED DURING: 9 growth stages; CONTAINS InterPro DOMAIN/s: NB-ARC (InterPro:IPR002182), Disease resistance protein (InterPro:IPR000767); BEST Arabidopsis…	-3.29016	5.45886	0.000106039	0.0185058
62167	20.1	stress.biotic	|MERCATOR: (loc_os11g44580.1 : 160.0) no description available & (gnl|cdd|36433 : 52.3) no description available & (at3g51560 : 46.6) Disease resistance protein (TIR-NBS-LRR class) family; FUNCTIONS IN: transmembrane receptor activity, ATP binding; INVOLVED IN: signal transduction, defense response, apoptosis, innate immune response; LOCATED IN: intrinsic to membrane; CONTAINS InterPro DOMAIN/s: …	-3.14693	3.31829	0.000122035	0.0196004
66457	20.1	stress.biotic	|MERCATOR: (loc_os06g17880.1 : 127.0) no description available & (at3g46530 : 72.4) Confers resistance to the biotrophic oomycete, Peronospora parasitica. Encodes an NBS-LRR type R protein with a putative amino-terminal leucine zipper. Fungal protein ATR13 induces RPP13 gene expression and disease resistance.; RECOGNITION OF PERONOSPORA PARASITICA 13 (RPP13); FUNCTIONS IN: ATP binding; INVOLVED I…	-8.90872	2.23644	1.08309e-08	8.37351e-05
67483	20.1	stress.biotic	|MERCATOR: (loc_os06g03500.1 : 154.0) no description available & (at3g46730 : 58.5) NB-ARC domain-containing disease resistance protein; FUNCTIONS IN: ATP binding; INVOLVED IN: defense response, apoptosis; LOCATED IN: endomembrane system; CONTAINS InterPro DOMAIN/s: NB-ARC (InterPro:IPR002182), Disease resistance protein (InterPro:IPR000767); BEST Arabidopsis thaliana protein match is: NB-ARC dom…	-2.22379	4.00184	0.000561285	0.0428142
70360	20.1	stress.biotic	|MERCATOR: (loc_os02g16060.1 : 367.0) no description available & (at3g14470 : 78.6) NB-ARC domain-containing disease resistance protein; FUNCTIONS IN: protein binding; INVOLVED IN: apoptosis, defense response; LOCATED IN: endomembrane system; EXPRESSED IN: 23 plant structures; EXPRESSED DURING: 14 growth stages; CONTAINS InterPro DOMAIN/s: Leucine-rich repeat-containing protein (InterPro:IPR01576…	-2.17337	8.35625	0.000164709	0.0225385
139293	20.1	stress.biotic	|MERCATOR: (loc_os11g35580.1 : 97.8) no description available & (gnl|cdd|38301 : 51.2) no description available & (at3g07040 : 44.3) Contains an N-terminal tripartite nucleotide binding site and a C-terminal tandem array of leucine-rich repeats. Confers resistance to Pseudomonas syringae strains that carry the avirulence genes avrB and avrRpm1.; RESISTANCE TO P. SYRINGAE PV MACULICOLA 1 (RPM1); F…	-9.13937	-0.686111	0.00026007	0.0284701
223266	20.1	stress.biotic	|MERCATOR: (loc_os06g17930.1 : 144.0) no description available & (at3g46730 : 62.4) NB-ARC domain-containing disease resistance protein; FUNCTIONS IN: ATP binding; INVOLVED IN: defense response, apoptosis; LOCATED IN: endomembrane system; CONTAINS InterPro DOMAIN/s: NB-ARC (InterPro:IPR002182), Disease resistance protein (InterPro:IPR000767); BEST Arabidopsis thaliana protein match is: NB-ARC dom…	-8.10602	-1.60816	8.25452e-05	0.0163349
243112	20.1	stress.biotic	|MERCATOR: (original description: no original description)||BRACHYPODIUM GENOME: Bradi4g21860.1 ; no original description||RICE GENOME: Loc_Os01g72680.1 ; 12001.m13302 protein disease resistance protein RPS2, putative|	-8.69035	-1.09444	0.000706482	0.0482822
330545	20.1	stress.biotic	|MERCATOR: (loc_os11g44580.1 : 190.0) no description available & (at3g14460 : 66.6) LRR and NB-ARC domains-containing disease resistance protein; FUNCTIONS IN: ATP binding; INVOLVED IN: apoptosis, defense response; CONTAINS InterPro DOMAIN/s: NB-ARC (InterPro:IPR002182), Leucine-rich repeat (InterPro:IPR001611), Disease resistance protein (InterPro:IPR000767); BEST Arabidopsis thaliana protein ma…	-8.19387	-1.53145	0.00014337	0.0210539
123842	20.2.1	stress.abiotic.heat	|MERCATOR: (loc_os03g16920.1 : 141.0) no description available & (at5g02490 : 124.0) Heat shock protein 70 (Hsp 70) family protein; FUNCTIONS IN: protein binding; INVOLVED IN: protein folding, response to cadmium ion, response to heat, response to bacterium; LOCATED IN: cytosol, cell wall, plasma membrane; EXPRESSED IN: 19 plant structures; EXPRESSED DURING: 10 growth stages; CONTAINS InterPro DO…	-2.95283	-0.410565	3.7571e-05	0.0105349
49213	20.2.3	stress.abiotic.drought/salt	|MERCATOR: (original description: no original description)||TAGI: TC408094;;Evalue=0;%ident=99.11|MAPMANSTORE: 0||BREAD.WHEAT.TIGR: TA100551_4565; TA100551_4565; Evalue=0; %ident=99.11||BRACHYPODIUM GENOME: Bradi4g00860.1 ; highly similar to ( 757) AT1G58520 | Symbols: RXW8 | hydrolase, acting on ester bonds / lipase | chr1:21729913-21731344 FORWARDnearly identical (1323) loc_os12g43720 12012.m08…	-2.16015	0.640196	0.000418426	0.0368319
76787	20.2.99	stress.abiotic.unspecified	|MERCATOR: (original description: no original description)||BRACHYPODIUM GENOME: Bradi2g11940.1 ; no original description||RICE GENOME: Loc_Os01g21250.1 ; 12001.m08609 protein protein induced upon tuberization, putative, expressed|	-2.65357	1.26267	4.68925e-07	0.000926821
52952	20.2	stress.abiotic	|MERCATOR: (loc_os04g52890.1 : 232.0) no description available & (at5g52060 : 125.0) A member of Arabidopsis BAG (Bcl-2-associated athanogene) proteins, plant homologs of mammalian regulators of apoptosis. Plant BAG proteins are multi-functional and remarkably similar to their animal counterparts, as they regulate apoptotic-like processes ranging from pathogen attack, to abiotic stress, to plant …	-2.12716	-0.0835823	0.000428668	0.0374053
21704	20	stress	|MERCATOR: (loc_os10g17960.1 : 385.0) no description available & (at4g05200 : 299.0) Encodes a cysteine-rich receptor-like protein kinase.; cysteine-rich RLK (RECEPTOR-like protein kinase) 25 (CRK25); FUNCTIONS IN: kinase activity; INVOLVED IN: protein amino acid phosphorylation; LOCATED IN: endomembrane system; EXPRESSED IN: root; CONTAINS InterPro DOMAIN/s: Protein kinase, ATP binding site (Int…	-9.28563	3.61799	4.33612e-05	0.0113204
31241	20	stress	|MERCATOR: (loc_os09g03630.1 : 61.2) no description available & (gnl|cdd|36433 : 53.9) no description available & (at1g62740 : 41.2) stress-inducible protein, putative; FUNCTIONS IN: binding; INVOLVED IN: response to cadmium ion, response to stress; LOCATED IN: cytosol, nucleus, plasma membrane; EXPRESSED IN: 25 plant structures; EXPRESSED DURING: 14 growth stages; CONTAINS InterPro DOMAIN/s: Hea…	-9.56893	-0.254914	0.000246701	0.0276603
33913	20	stress	|MERCATOR: (loc_os11g39450.1 : 110.0) no description available & (at1g56145 : 77.8) Leucine-rich repeat transmembrane protein kinase; FUNCTIONS IN: protein serine/threonine kinase activity, protein kinase activity, ATP binding; INVOLVED IN: protein amino acid phosphorylation; EXPRESSED IN: 18 plant structures; EXPRESSED DURING: 7 growth stages; CONTAINS InterPro DOMAIN/s: Serine/threonine-protein…	-9.01856	-0.806285	0.000474314	0.039336
35402	20	stress	|MERCATOR: (loc_os11g34624.1 : 92.8) no description available & (at4g23220 : 88.6) Encodes a cysteine-rich receptor-like protein kinase.; cysteine-rich RLK (RECEPTOR-like protein kinase) 14 (CRK14); FUNCTIONS IN: kinase activity; INVOLVED IN: protein amino acid phosphorylation; LOCATED IN: cellular_component unknown; EXPRESSED IN: 14 plant structures; EXPRESSED DURING: 9 growth stages; CONTAINS I…	-10.665	0.775418	9.35865e-05	0.0173457
61740	20	stress	|MERCATOR: (loc_os03g03280.1 : 69.3) no description available & (gnl|cdd|36433 : 52.7) no description available & (at5g28680 : 46.2) Receptor-like kinase required for maintenance of pollen tube growth. Display polar localization at the plasma membrane of the pollen tube tip.; ANXUR2 (ANX2); FUNCTIONS IN: protein serine/threonine kinase activity, protein kinase activity, kinase activity, ATP bindi…	-2.05142	2.10591	2.10406e-07	0.00067524
41248	21.2.1	redox.ascorbate and glutathione.ascorbate	|MERCATOR: (loc_os03g17690.1 : 82.0) no description available & (p93404|apx1_orysa : 80.1) L-ascorbate peroxidase 1, cytosolic (EC 1.11.1.11) (APXa) (OsAPx01) - Oryza sativa (Rice) & (at1g07890 : 68.2) Encodes a cytosolic ascorbate peroxidase APX1. Ascorbate peroxidases are enzymes that scavenge hydrogen peroxide in plant cells. Eight types of APX have been described for Arabidopsis: three cytoso…	-3.17281	1.87776	3.27697e-05	0.0102122
82763	21.2.1	redox.ascorbate and glutathione.ascorbate	|MERCATOR: (original description: no original description)||BREAD.WHEAT.TIGR: BG908461; BG908461; Evalue=5E-134; %ident=84.25||BRACHYPODIUM GENOME: Bradi5g20670.5 ; moderately similar to ( 377) AT4G09010 | Symbols: APX4 | APX4 (ASCORBATE PEROXIDASE 4); heme binding / peroxidase | chr4:5777502-5779338 REVERSEmoderately similar to ( 478) loc_os04g51300 12004.m10026 protein L-ascorbate peroxidase, c…	-2.55016	0.00391322	0.000290888	0.030127
16007	21.2	redox.ascorbate and glutathione	|MERCATOR: (original description: no original description)||TAGI: TC413137;weakly similar to UniRef100_Q6I681 Cluster: Cytochrome b561; n=1; Zea mays;Rep: Cytochrome b561 - Zea mays (Maize), partial (73%);Evalue=2E-29;%ident=97.37|MAPMANSTORE: weakly similar to ( 122) AT4G25570 ; Symbols: ACYB-2 ; ACYB-2; carbon-monoxide oxygenase ; chr4:13053887-13055518 REVERSEweakly similar to ( 184) loc_os08g…	-7.89289	-0.0730006	0.000520553	0.0410773
26254	26.1	misc.misc2	|MERCATOR: (loc_os10g35520.1 : 72.8) no description available & (gnl|cdd|36433 : 57.7) no description available & (at4g15960 : 48.5) alpha/beta-Hydrolases superfamily protein; FUNCTIONS IN: epoxide hydrolase activity, catalytic activity; INVOLVED IN: biological_process unknown; LOCATED IN: mitochondrion; CONTAINS InterPro DOMAIN/s: Epoxide hydrolase-like (InterPro:IPR000639), Alpha/beta hydrolase…	-2.27358	1.89841	5.57658e-06	0.00366524
25015	26.2	misc.UDP glucosyl and glucoronyl transferases	|MERCATOR: (loc_os11g04860.1 : 271.0) no description available & (at4g15550 : 153.0) UDP-glucose:indole-3-acetate beta-D-glucosyltransferase; indole-3-acetate beta-D-glucosyltransferase (IAGLU); FUNCTIONS IN: UDP-glycosyltransferase activity, transferase activity, transferring glycosyl groups; INVOLVED IN: metabolic process; LOCATED IN: chloroplast; EXPRESSED IN: 17 plant structures; EXPRESSED DU…	-2.03126	0.902656	9.12281e-05	0.0171114
45828	26.2	misc.UDP glucosyl and glucoronyl transferases	|MERCATOR: (loc_os05g08480.1 : 127.0) no description available & (at2g36760 : 57.8) UDP-glucosyl transferase 73C2 (UGT73C2); FUNCTIONS IN: transferase activity, transferring hexosyl groups, UDP-glycosyltransferase activity, transferase activity, transferring glycosyl groups; INVOLVED IN: metabolic process; LOCATED IN: endomembrane system; EXPRESSED IN: flower, stamen; EXPRESSED DURING: 4 anthesis…	-3.79851	-0.853766	0.000453283	0.0382442
56489	26.2	misc.UDP glucosyl and glucoronyl transferases	|MERCATOR: (loc_os06g39330.1 : 261.0) no description available & (at4g15550 : 103.0) UDP-glucose:indole-3-acetate beta-D-glucosyltransferase; indole-3-acetate beta-D-glucosyltransferase (IAGLU); FUNCTIONS IN: UDP-glycosyltransferase activity, transferase activity, transferring glycosyl groups; INVOLVED IN: metabolic process; LOCATED IN: chloroplast; EXPRESSED IN: 17 plant structures; EXPRESSED DU…	-2.29896	2.22288	0.000282259	0.029815
62603	26.2	misc.UDP glucosyl and glucoronyl transferases	|MERCATOR: (loc_os01g53330.1 : 568.0) no description available & (at3g16520 : 318.0) UDP-glucosyl transferase 88A1 (UGT88A1); FUNCTIONS IN: in 6 functions; INVOLVED IN: metabolic process; LOCATED IN: cellular_component unknown; EXPRESSED IN: 22 plant structures; EXPRESSED DURING: 13 growth stages; CONTAINS InterPro DOMAIN/s: UDP-glucuronosyl/UDP-glucosyltransferase (InterPro:IPR002213); BEST Arab…	-2.06934	5.46779	3.56093e-05	0.0105233
4848	26.3.2	misc.gluco-, galacto- and mannosidases.beta-galactosidase	|MERCATOR: (loc_os05g35360.1 : 290.0) no description available & (at1g77410 : 191.0) beta-galactosidase 16 (BGAL16); FUNCTIONS IN: cation binding, sugar binding, beta-galactosidase activity, hydrolase activity, hydrolyzing O-glycosyl compounds, catalytic activity; INVOLVED IN: lactose catabolic process, using glucoside 3-dehydrogenase, carbohydrate metabolic process, lactose catabolic process via…	2.75694	-1.27867	0.000143105	0.0210539
55720	26.3	misc.gluco-, galacto- and mannosidases	|MERCATOR: (original description: no original description)||TAGI: DR734448;similar to UniRef100_A7QJH2 Cluster: Chromosome chr8 scaffold_106, whole genome shotgun sequence; n=1; Vitis vinifera;Rep: Chromosome chr8 scaffold_106, whole genome shotgun sequence - Vitis vinifera (Grape), partial (25%);Evalue=4E-169;%ident=97.43|MAPMANSTORE: moderately similar to ( 415) loc_os01g16310 12001.m08227 prot…	-3.87726	-0.427202	4.06194e-05	0.0108696
11565	26.4.1	misc.beta 1,3 glucan hydrolases.glucan endo-1,3-beta-glucosidase	|MERCATOR: (loc_os01g64170.3 : 121.0) no description available & (at2g27500 : 90.9) Glycosyl hydrolase superfamily protein; FUNCTIONS IN: cation binding, hydrolase activity, hydrolyzing O-glycosyl compounds, catalytic activity; INVOLVED IN: carbohydrate metabolic process; LOCATED IN: anchored to plasma membrane, nucleus, cytoplasm; EXPRESSED IN: 23 plant structures; EXPRESSED DURING: 13 growth st…	-5.73564	-1.72644	0.000559399	0.0427583
259721	26.6	misc.O-methyl transferases	|MERCATOR: (loc_os11g20090.1 : 134.0) no description available & (p47917|zrp4_maize : 96.7) O-methyltransferase ZRP4 (EC 2.1.1.-) (OMT) - Zea mays (Maize) & (at4g35160 : 61.2) O-methyltransferase family protein; FUNCTIONS IN: methyltransferase activity, O-methyltransferase activity, protein dimerization activity; LOCATED IN: cytosol; CONTAINS InterPro DOMAIN/s: Winged helix-turn-helix transcripti…	-9.06109	-0.767284	0.000449769	0.0382442
52379	26.7	misc.oxidases - copper, flavone etc.	|MERCATOR: (loc_os08g02230.1 : 129.0) no description available & (at2g46740 : 122.0) D-arabinono-1,4-lactone oxidase family protein; FUNCTIONS IN: oxidoreductase activity, D-arabinono-1,4-lactone oxidase activity, FAD binding, catalytic activity; INVOLVED IN: oxidation reduction; LOCATED IN: cell wall; EXPRESSED IN: leaf apex, root; CONTAINS InterPro DOMAIN/s: D-arabinono-1,4-lactone oxidase (Int…	-4.54289	1.94292	7.44382e-06	0.00418864
119212	26.7	misc.oxidases - copper, flavone etc.	|MERCATOR: (loc_os12g12590.1 : 140.0) no description available & (at3g03080 : 123.0) Zinc-binding dehydrogenase family protein; FUNCTIONS IN: oxidoreductase activity, binding, zinc ion binding, catalytic activity; INVOLVED IN: oxidation reduction, metabolic process; LOCATED IN: cellular_component unknown; EXPRESSED IN: 8 plant structures; EXPRESSED DURING: L mature pollen stage, M germinated poll…	-7.61973	-0.341651	0.000726982	0.0490155
44455	26.9	misc.glutathione S transferases	|MERCATOR: (original description: no original description)||TAGI: TC449256;;Evalue=8E-107;%ident=100|MAPMANSTORE: moderately similar to ( 274) AT5G02790 ; Symbols: ; In2-1 protein, putative ; chr5:632877-634858 FORWARDmoderately similar to ( 300) IN21_MAIZE IN2-1 protein - Zea mays (Maize)moderately similar to ( 399) loc_os03g17470 12003.m07174 protein IN2-1 protein, putative, expressed||BREAD.WH…	-2.612	0.0420556	0.000672817	0.047348
64221	26.9	misc.glutathione S transferases	|MERCATOR: (loc_os10g38470.1 : 133.0) no description available & (q06398|gstu6_orysa : 104.0) Probable glutathione S-transferase GSTU6 (EC 2.5.1.18) (28 kDa cold-induced protein) - Oryza sativa (Rice) & (at1g10370 : 83.6) EARLY-RESPONSIVE TO DEHYDRATION 9 (ERD9); FUNCTIONS IN: glutathione transferase activity; INVOLVED IN: response to water deprivation, response to karrikin, toxin catabolic proce…	-3.25271	1.34878	2.75131e-06	0.00254214
31624	26.1	misc.cytochrome P450	|MERCATOR: (original description: no original description)||TAGI: TC392934;weakly similar to UniRef100_A7PY17 Cluster: Chromosome chr15 scaffold_37, whole genome shotgun sequence; n=1; Vitis vinifera;Rep: Chromosome chr15 scaffold_37, whole genome shotgun sequence - Vitis vinifera (Grape), partial (65%);Evalue=3E-152;%ident=100|MAPMANSTORE: moderately similar to ( 494) AT2G45510 ; Symbols: CYP704…	-7.47763	-0.46418	0.000748504	0.0497425
45443	26.1	misc.cytochrome P450	|MERCATOR: (loc_os03g45619.1 : 660.0) no description available & (q7xu38|c87a3_orysa : 474.0) Cytochrome P450 87A3 (EC 1.14.-.-) - Oryza sativa (Rice) & (at1g12740 : 436.0) encodes a protein with cytochrome P450 domain; "cytochrome P450, family 87, subfamily A, polypeptide 2" (CYP87A2); FUNCTIONS IN: electron carrier activity, monooxygenase activity, iron ion binding, oxygen binding, heme binding…	-8.06452	1.46451	0.00017065	0.0230891
57096	26.1	misc.cytochrome P450	|MERCATOR: (loc_os02g38940.1 : 132.0) no description available & (o22307|c71db_lotja : 108.0) Cytochrome P450 71D11 (EC 1.14.-.-) (Fragment) - Lotus japonicus & (at2g02580 : 96.7) member of CYP71B; "cytochrome P450, family 71, subfamily B, polypeptide 9" (CYP71B9); FUNCTIONS IN: electron carrier activity, monooxygenase activity, iron ion binding, oxygen binding, heme binding; INVOLVED IN: oxidati…	-4.05126	0.134517	3.50916e-05	0.0105114
65049	26.1	misc.cytochrome P450	|MERCATOR: (loc_os08g01510.1 : 446.0) no description available & (q43257|c71c4_maize : 419.0) Cytochrome P450 71C4 (EC 1.14.-.-) (Benzoxazineless 2) - Zea mays (Maize) & (at3g48280 : 284.0) putative cytochrome P450; "cytochrome P450, family 71, subfamily A, polypeptide 25" (CYP71A25); FUNCTIONS IN: electron carrier activity, monooxygenase activity, iron ion binding, oxygen binding, heme binding; …	-6.58888	3.44826	0.000183371	0.0238974
220142	26.11	misc.alcohol dehydrogenases	|MERCATOR: (original description: no original description)||BREAD.WHEAT.TIGR: TA106457_4565; Hypothetical protein [Oryza sativa (Rice)]; Evalue=0; %ident=100||BRACHYPODIUM GENOME: Bradi4g36090.1 ; weakly similar to ( 125) loc_os05g05370 12005.m05064 protein hypothetical protein no original description||RICE GENOME: Loc_Os05g05370.1 ; 12005.m05064 protein hypothetical protein|	-8.14701	0.164325	0.000188048	0.0241926
43894	26.13	misc.acid and other phosphatases	|MERCATOR: (loc_os01g47580.1 : 340.0) no description available & (at1g15080 : 270.0) Encodes phosphatidic acid phosphatase. Involved in ABA signaling. Functions as a negative regulator upstream of ABI4. Expressed during germination and seed development. Expressed overall in young seedlings, in roots, hypocotyls, and vascular cells of cotyledons and leaves of 10 day-old seedlings, in flower filame…	-2.70337	-0.454097	0.000284164	0.029859
41608	26.16	misc.myrosinases-lectin-jacalin	|MERCATOR: (loc_os03g56160.1 : 256.0) no description available & (at2g37710 : 170.0) Induced in response to Salicylic acid.; receptor lectin kinase (RLK); FUNCTIONS IN: kinase activity; INVOLVED IN: response to salicylic acid stimulus; LOCATED IN: plasma membrane; EXPRESSED IN: 23 plant structures; EXPRESSED DURING: 13 growth stages; CONTAINS InterPro DOMAIN/s: Legume lectin, beta chain (InterPro…	-2.77731	0.606093	7.61226e-07	0.0013095
49415	26.16	misc.myrosinases-lectin-jacalin	|MERCATOR: (loc_os04g44910.1 : 113.0) no description available & (at2g37710 : 99.0) Induced in response to Salicylic acid.; receptor lectin kinase (RLK); FUNCTIONS IN: kinase activity; INVOLVED IN: response to salicylic acid stimulus; LOCATED IN: plasma membrane; EXPRESSED IN: 23 plant structures; EXPRESSED DURING: 13 growth stages; CONTAINS InterPro DOMAIN/s: Legume lectin, beta chain (InterPro:…	-4.64749	-1.14808	2.38136e-05	0.0085104
55743	26.16	misc.myrosinases-lectin-jacalin	|MERCATOR: (loc_os05g13770.1 : 120.0) no description available & (at2g37710 : 119.0) Induced in response to Salicylic acid.; receptor lectin kinase (RLK); FUNCTIONS IN: kinase activity; INVOLVED IN: response to salicylic acid stimulus; LOCATED IN: plasma membrane; EXPRESSED IN: 23 plant structures; EXPRESSED DURING: 13 growth stages; CONTAINS InterPro DOMAIN/s: Legume lectin, beta chain (InterPro…	-9.24212	-0.585396	0.000452041	0.0382442
31725	26.18	misc.invertase/pectin methylesterase inhibitor family protein	|MERCATOR: (original description: no original description)||TAGI: TC436873;;Evalue=2E-89;%ident=96.04|MAPMANSTORE: weakly similar to ( 110) loc_os08g01670 12008.m04315 protein c/VIF2, putative, expressed||BREAD.WHEAT.TIGR: BE429894; BE429894; Evalue=2E-89; %ident=96.04|	-3.23792	-0.873116	6.55856e-05	0.0146797
66862	26.19	misc.plastocyanin-like	|MERCATOR: (loc_os01g56020.1 : 249.0) no description available & (gnl|cdd|36433 : 59.7) no description available & (gnl|cdd|82074 : 43.6) no description available & (at4g27520 : 40.4) early nodulin-like protein 2 (ENODL2); FUNCTIONS IN: electron carrier activity, copper ion binding; LOCATED IN: in 6 components; EXPRESSED IN: 24 plant structures; EXPRESSED DURING: 13 growth stages; CONTAINS InterP…	-3.09952	0.969499	7.18741e-05	0.0155106
59288	26.21	misc.protease inhibitor/seed storage/lipid transfer protein (LTP) family protein	|MERCATOR: (loc_os04g52260.1 : 162.0) no description available & (at3g22142 : 115.0) Encodes a Protease inhibitor/seed storage/LTP family protein; Bifunctional inhibitor/lipid-transfer protein/seed storage 2S albumin superfamily protein; INVOLVED IN: lipid transport; LOCATED IN: cellular_component unknown; CONTAINS InterPro DOMAIN/s: Bifunctional inhibitor/plant lipid transfer protein/seed storag…	-2.43863	5.73037	3.497e-07	0.00083053
48760	26.22	misc.short chain dehydrogenase/reductase (SDR)	|MERCATOR: (loc_os02g39490.1 : 174.0) no description available & (at3g59710 : 136.0) NAD(P)-binding Rossmann-fold superfamily protein; FUNCTIONS IN: oxidoreductase activity, binding, catalytic activity; INVOLVED IN: oxidation reduction, metabolic process; LOCATED IN: endomembrane system; EXPRESSED IN: leaf lamina base, root, carpel; EXPRESSED DURING: 4 anthesis; CONTAINS InterPro DOMAIN/s: NAD(P)…	-2.92581	-0.00856778	0.000179896	0.0235977
43464	26.24	misc.GCN5-related N-acetyltransferase	|MERCATOR: (original description: no original description)||TAGI: TC421429;similar to UniRef100_Q4SPV6 Cluster: Chromosome 7 SCAF14536, whole genome shotgun sequence; n=1; Tetraodon nigroviridis;Rep: Chromosome 7 SCAF14536, whole genome shotgun sequence - Tetraodon nigroviridis (Green puffer), partial (5%);Evalue=8E-128;%ident=97.05|MAPMANSTORE: weakly similar to ( 184) loc_os02g18660 12002.m0710…	-4.70542	-0.430134	7.89406e-05	0.0161116
22791	26.28	misc.GDSL-motif lipase	|MERCATOR: (original description: no original description)||TAGI: TC437944;;Evalue=2E-72;%ident=91.54|MAPMANSTORE: very weakly similar to (99.8) loc_os06g47910 12006.m09317 protein alpha-L-fucosidase 2 precursor, putative, expressed||BREAD.WHEAT.TIGR: TA103883_4565; TA103883_4565; Evalue=3E-72; %ident=91.54|	-8.75398	-1.04556	0.00069247	0.0479784
48592	26.28	misc.GDSL-motif lipase	|MERCATOR: (loc_os01g11650.2 : 119.0) no description available & (at5g45910 : 71.2) GDSL-like Lipase/Acylhydrolase superfamily protein; FUNCTIONS IN: hydrolase activity, acting on ester bonds, carboxylesterase activity; INVOLVED IN: lipid metabolic process; LOCATED IN: endomembrane system; EXPRESSED IN: 9 plant structures; EXPRESSED DURING: 4 anthesis, C globular stage, D bilateral stage; CONTAIN…	-2.62231	-0.0718154	0.000589082	0.0441145
35879	27.1.1	RNA.processing.splicing	|MERCATOR: (original description: no original description)||TAGI: TC373601;weakly similar to UniRef100_A6ZWE8 Cluster: Conserved protein; n=1; Saccharomyces cerevisiae YJM789;Rep: Conserved protein - Saccharomyces cerevisiae (strain YJM789) (Baker's yeast), partial (4%);Evalue=0;%ident=99.78|MAPMANSTORE: weakly similar to ( 118) loc_os01g73656 12001.m42510 protein expressed protein weakly similar…	-8.85415	-0.945888	0.000633899	0.0459836
42761	27.1.19	RNA.processing.ribonucleases	|MERCATOR: (original description: no original description)||TAGI: TC384453;similar to UniRef100_A7PNN2 Cluster: Chromosome chr8 scaffold_23, whole genome shotgun sequence; n=1; Vitis vinifera;Rep: Chromosome chr8 scaffold_23, whole genome shotgun sequence - Vitis vinifera (Grape), partial (5%);Evalue=0;%ident=96.68|MAPMANSTORE: similar to UniRef100_A7PNN2 Cluster: Chromosome chr8 scaffold_23, who…	-8.77458	-1.02716	0.000675038	0.0473699
49027	27.1.19	RNA.processing.ribonucleases	|MERCATOR: (original description: no original description)||TAGI: BU100816;similar to UniRef100_A6YSL1 Cluster: Chloroplast ribonuclease III domain protein; n=1; Zea mays;Rep: Chloroplast ribonuclease III domain protein - Zea mays (Maize), partial (7%);Evalue=2E-109;%ident=95.9|MAPMANSTORE: similar to UniRef100_A6YSL1 Cluster: Chloroplast ribonuclease III domain protein; n=1; Zea mays;Rep: Chloro…	-4.8216	-1.26531	0.000363032	0.034476
43884	27.2	RNA.transcription	|MERCATOR: (original description: no original description)||TAGI: TC414715;weakly similar to UniRef100_Q0JEM3 Cluster: Os04g0243500 protein; n=1; Oryza sativa Japonica Group;Rep: Os04g0243500 protein - Oryza sativa subsp. japonica (Rice), partial (16%);Evalue=0;%ident=99.93|MAPMANSTORE: moderately similar to ( 427) loc_os06g15570 12006.m32042 protein retrotransposon protein, putative, unclassifie…	-8.69554	1.62244	0.000233027	0.0269814
50624	27.2	RNA.transcription	|MERCATOR: (loc_os09g17800.1 : 137.0) no description available & (at3g29750 : 48.1) Eukaryotic aspartyl protease family protein; FUNCTIONS IN: aminoacyl-tRNA ligase activity, nucleotide binding, ATP binding; INVOLVED IN: translation, tRNA aminoacylation for protein translation; LOCATED IN: cytoplasm; CONTAINS InterPro DOMAIN/s: Aminoacyl-tRNA synthetase, class II (D/K/N)-like (InterPro:IPR018150)…	-11.0744	1.18563	1.28317e-05	0.00585292
202320	27.2	RNA.transcription	|MERCATOR: (loc_os04g22110.1 : 119.0) no description available & (gnl|cdd|36433 : 48.1) no description available & (at3g42723 : 40.0) aminoacyl-tRNA ligases;ATP binding;nucleotide binding; FUNCTIONS IN: nucleotide binding, aminoacyl-tRNA ligase activity, ATP binding; INVOLVED IN: translation, tRNA aminoacylation for protein translation; LOCATED IN: cytoplasm; CONTAINS InterPro DOMAIN/s: Aminoacyl…	-3.28061	-0.562246	0.000250045	0.027828
49725	27.3.4	RNA.regulation of transcription.ARF, Auxin Response Factor family	|MERCATOR: (loc_os06g47150.4 : 117.0) no description available & (at2g28350 : 100.0) Involved in root cap cell differentiation.; auxin response factor 10 (ARF10); FUNCTIONS IN: sequence-specific DNA binding transcription factor activity, miRNA binding; INVOLVED IN: in 13 processes; LOCATED IN: nucleus; EXPRESSED IN: 25 plant structures; EXPRESSED DURING: 15 growth stages; CONTAINS InterPro DOMAIN…	-4.13852	-0.375919	0.000565104	0.0429058
54156	27.3.7	RNA.regulation of transcription.C2C2(Zn) CO-like, Constans-like zinc finger family	|MERCATOR: (loc_os02g08150.1 : 164.0) no description available & (at5g24930 : 50.1) CONSTANS-like 4 (COL4); FUNCTIONS IN: sequence-specific DNA binding transcription factor activity, zinc ion binding; INVOLVED IN: regulation of transcription; LOCATED IN: intracellular, chloroplast; EXPRESSED IN: 21 plant structures; EXPRESSED DURING: 13 growth stages; CONTAINS InterPro DOMAIN/s: CCT domain (Inter…	-2.77194	2.34951	7.12064e-08	0.000357272
32635	27.3.25	RNA.regulation of transcription.MYB domain transcription factor family	|MERCATOR: (loc_os04g49450.1 : 146.0) no description available & (at5g17300 : 118.0) Myb-like transcription factor that regulates hypocotyl growth by regulating free auxin levels in a time-of-day specific manner.; REVEILLE 1 (RVE1); CONTAINS InterPro DOMAIN/s: SANT, DNA-binding (InterPro:IPR001005), Homeodomain-like (InterPro:IPR009057), Myb, DNA-binding (InterPro:IPR014778), HTH transcriptional …	-5.17242	-0.48887	2.59506e-05	0.00897965
55736	27.3.25	RNA.regulation of transcription.MYB domain transcription factor family	|MERCATOR: (loc_os05g49240.1 : 122.0) no description available & (at1g19510 : 85.1) RAD-like 5 (RL5); FUNCTIONS IN: DNA binding, sequence-specific DNA binding transcription factor activity; INVOLVED IN: regulation of transcription, DNA-dependent; EXPRESSED IN: 11 plant structures; EXPRESSED DURING: 9 growth stages; CONTAINS InterPro DOMAIN/s: SANT, DNA-binding (InterPro:IPR001005), Molecular chap…	-3.3425	-0.474989	2.52514e-05	0.00883931
41072	27.3.26	RNA.regulation of transcription.MYB-related transcription factor family	|MERCATOR: (original description: no original description)||TAGI: TC395125;similar to UniRef100_Q9XHV8 Cluster: 10A19I.8; n=1; Oryza sativa Japonica Group;Rep: 10A19I.8 - Oryza sativa subsp. japonica (Rice), partial (30%);Evalue=6E-74;%ident=98.73|MAPMANSTORE: weakly similar to ( 101) AT2G21650 ; Symbols: MEE3, ATRL2 ; MEE3 (MATERNAL EFFECT EMBRYO ARREST 3); DNA binding / transcription factor ; c…	-3.43052	-0.288146	0.000655154	0.0468474
49039	27.3.26	RNA.regulation of transcription.MYB-related transcription factor family	|MERCATOR: (loc_os01g34060.1 : 102.0) no description available & (at1g49010 : 85.9) Duplicated homeodomain-like superfamily protein; CONTAINS InterPro DOMAIN/s: Molecular chaperone, heat shock protein, Hsp40, DnaJ (InterPro:IPR015609), SANT, eukarya (InterPro:IPR017884), Myb-like DNA-binding domain, SHAQKYF class (InterPro:IPR006447), SANT, DNA-binding (InterPro:IPR001005), Myb, DNA-binding (Inte…	-3.14536	-0.209383	0.000754454	0.0498286
58804	27.3.26	RNA.regulation of transcription.MYB-related transcription factor family	|MERCATOR: (original description: no original description)||TAGI: TC416591;;Evalue=0;%ident=97.96|MAPMANSTORE: weakly similar to ( 119) AT1G18330 ; Symbols: EPR1 ; EPR1 (EARLY-PHYTOCHROME-RESPONSIVE1); DNA binding / transcription factor ; chr1:6306196-6307718 REVERSEmoderately similar to ( 207) loc_os04g49450 12004.m35436 protein expressed protein||BREAD.WHEAT.TIGR: TA84789_4565; TA84789_4565; Ev…	-4.13135	1.09353	2.07446e-05	0.00783378
47167	27.3.27	RNA.regulation of transcription.NAC domain transcription factor family	|MERCATOR: (original description: no original description)||TAGI: TC391121;homologue to UniRef100_Q9ZRZ3 Cluster: GRAB1 protein; n=1; Triticum sp.;Rep: GRAB1 protein - Triticum sp, partial (55%);Evalue=0;%ident=100|MAPMANSTORE: weakly similar to ( 167) NAC67_ORYSA NAC domain-containing protein 67 (ONAC067) - Oryza sativa (Rice)weakly similar to ( 167) loc_os07g12340 12007.m05687 protein NAC domai…	-2.59157	-0.189952	9.09722e-05	0.0171114
52364	27.3.32	RNA.regulation of transcription.WRKY domain transcription factor family	|MERCATOR: (loc_os04g21950.1 : 163.0) no description available & (at4g31550 : 87.0) member of WRKY Transcription Factor; Group II-d; negative regulator of basal resistance to Pseudomonas syringae.; WRKY DNA-binding protein 11 (WRKY11); CONTAINS InterPro DOMAIN/s: DNA-binding WRKY (InterPro:IPR003657), Transcription factor, WRKY, Zn-cluster (InterPro:IPR018872); BEST Arabidopsis thaliana protein m…	-4.6903	-0.560579	0.000311626	0.0311672
53508	27.3.32	RNA.regulation of transcription.WRKY domain transcription factor family	|MERCATOR: (loc_os01g14440.1 : 204.0) no description available & (at1g62300 : 97.4) Encodes a transcription factor WRKY6. Regulates Phosphate1 (Pho1) expression in response to low phosphate (Pi) stress.; WRKY6; CONTAINS InterPro DOMAIN/s: DNA-binding WRKY (InterPro:IPR003657); BEST Arabidopsis thaliana protein match is: WRKY family transcription factor (TAIR:AT4G04450.1); Has 3824 Blast hits to 3…	-2.89376	0.319445	1.27056e-05	0.00583964
63338	27.3.32	RNA.regulation of transcription.WRKY domain transcription factor family	|MERCATOR: (loc_os02g08440.2 : 205.0) no description available & (at1g80840 : 130.0) Pathogen-induced transcription factor. Binds W-box sequences in vitro. Forms protein complexes with itself and with WRKY40 and WRKY60. Coexpression with WRKY18 or WRKY60 made plants more susceptible to both P. syringae and B. cinerea. WRKY18, WRKY40, and WRKY60 have partially redundant roles in response to the he…	-3.73932	1.16494	4.86725e-06	0.00344136
52953	27.3.36	RNA.regulation of transcription.Argonaute	|MERCATOR: (original description: no original description)||BRACHYPODIUM GENOME: Bradi1g02050.1 ; weakly similar to ( 125) AT2G27880 | Symbols: AGO5 | AGO5 (ARGONAUTE 5); nucleic acid binding | chr2:11871488-11876712 FORWARDmoderately similar to ( 216) loc_os03g58600 12003.m10765 protein argonaute-like protein, putative, expressedPAZ_argonaute_like no original description||RICE GENOME: Loc_Os09g3…	-9.72159	1.71689	0.000130103	0.0201892
29908	27.3.40	RNA.regulation of transcription.Aux/IAA family	|MERCATOR: (original description: no original description)||TAGI: TC409206;similar to UniRef100_Q5I7F3 Cluster: Aux/IAA1; n=1; Avena sativa;Rep: Aux/IAA1 - Avena sativa (Oat), partial (61%);Evalue=4E-111;%ident=99.55|MAPMANSTORE: weakly similar to ( 135) IAA21_ORYSA Auxin-responsive protein IAA21 (Indoleacetic acid-induced protein 21) - Oryza sativa (Rice)weakly similar to ( 135) loc_os06g22870 1…	-2.26599	-0.0119928	0.000604234	0.0447483
48135	27.3.46	RNA.regulation of transcription.DNA methyltransferases	|MERCATOR: (at4g14140 : 70.5) This gene is predicted to encode a DNA methyltransferase. A plant line expressing an RNAi construct directed against DMT2 has reduced agrobacterium-mediated tumor formation.; DNA methyltransferase 2 (DMT2); FUNCTIONS IN: DNA binding, DNA (cytosine-5-)-methyltransferase activity; INVOLVED IN: DNA mediated transformation, DNA methylation; LOCATED IN: nucleus; CONTAINS …	-4.07376	-0.188819	0.000287075	0.0299558
23549	27.3.55	RNA.regulation of transcription.HDA	|MERCATOR: (loc_os07g41090.3 : 154.0) no description available & (at5g61060 : 141.0) Encodes a member of the histone deacetylase family.; histone deacetylase 5 (HDA05); FUNCTIONS IN: histone deacetylase activity; INVOLVED IN: histone deacetylation; LOCATED IN: nucleus, cytoplasm; EXPRESSED IN: 22 plant structures; EXPRESSED DURING: 13 growth stages; CONTAINS InterPro DOMAIN/s: Histone deacetylase…	-8.25072	-1.46876	0.000400345	0.0361385
62474	27.3.67	RNA.regulation of transcription.putative transcription regulator	|MERCATOR: (loc_os02g49670.1 : 65.5) no description available & (gnl|cdd|36433 : 53.1) no description available & (at1g75560 : 41.6) zinc knuckle (CCHC-type) family protein; FUNCTIONS IN: zinc ion binding, nucleic acid binding; INVOLVED IN: biological_process unknown; LOCATED IN: chloroplast; EXPRESSED IN: 23 plant structures; EXPRESSED DURING: 15 growth stages; CONTAINS InterPro DOMAIN/s: Zinc f…	-3.81621	3.00128	4.84653e-06	0.00344136
20859	27.3.99	RNA.regulation of transcription.unclassified	|MERCATOR: (original description: no original description)||TAGI: TC383167;weakly similar to UniRef100_Q6QPD1 Cluster: E3 25.4 kDa; n=1; Simian adenovirus 23;Rep: E3 25.4 kDa - Simian adenovirus 23, partial (10%);Evalue=0;%ident=100|MAPMANSTORE: weakly similar to UniRef100_Q6QPD1 Cluster: E3 25.4 kDa; n=1; Simian adenovirus 23;Rep: E3 25.4 kDa - Simian adenovirus 23, partial (10%)||BREAD.WHEAT.TI…	-9.99196	0.12133	0.000115269	0.0192249
39970	27.3.99	RNA.regulation of transcription.unclassified	|MERCATOR: (original description: no original description)||TAGI: TC371797;weakly similar to UniRef100_A7QNV6 Cluster: Chromosome chr1 scaffold_135, whole genome shotgun sequence; n=1; Vitis vinifera;Rep: Chromosome chr1 scaffold_135, whole genome shotgun sequence - Vitis vinifera (Grape), partial (73%);Evalue=4E-110;%ident=100|MAPMANSTORE: weakly similar to ( 154) AT1G10590 ; Symbols: ; DNA-bind…	-8.58467	-1.18257	0.000574769	0.0435299
42564	27.3.99	RNA.regulation of transcription.unclassified	|MERCATOR: (loc_os08g16770.1 : 300.0) no description available & (at1g64260 : 92.4) MuDR family transposase; FUNCTIONS IN: zinc ion binding; INVOLVED IN: biological_process unknown; LOCATED IN: cellular_component unknown; EXPRESSED IN: shoot apex, embryo, leaf whorl, flower, seed; EXPRESSED DURING: F mature embryo stage, petal differentiation and expansion stage, E expanded cotyledon stage, D bil…	-5.45956	1.59645	0.000224419	0.0265985
53382	27.3.99	RNA.regulation of transcription.unclassified	|MERCATOR: (at2g27660 : 65.9) Cysteine/Histidine-rich C1 domain family protein; FUNCTIONS IN: zinc ion binding; LOCATED IN: chloroplast; EXPRESSED IN: 12 plant structures; EXPRESSED DURING: 9 growth stages; CONTAINS InterPro DOMAIN/s: DC1 (InterPro:IPR004146), Zinc finger, ZZ-type (InterPro:IPR000433), C1-like (InterPro:IPR011424); BEST Arabidopsis thaliana protein match is: Cysteine/Histidine-ri…	-4.06035	2.10538	8.05818e-05	0.0161725
41271	27.4	RNA.RNA binding	|MERCATOR: (loc_os03g46770.2 : 128.0) no description available & (at2g21660 : 126.0) Encodes a small glycine-rich RNA binding protein that is part of a negative-feedback loop through which AtGRP7 regulates the circadian oscillations of its own transcript. Gene expression is induced by cold. GRP7 appears to promote stomatal opening and reduce tolerance under salt and dehydration stress conditions,…	-2.44659	3.57561	0.000105871	0.0185058
51226	27.4	RNA.RNA binding	|MERCATOR: (loc_os03g46770.2 : 59.3) no description available & (p49310|grp1_sinal : 57.0) Glycine-rich RNA-binding protein GRP1A - Sinapis alba (White mustard) (Brassica hirta) & (at2g21660 : 54.3) Encodes a small glycine-rich RNA binding protein that is part of a negative-feedback loop through which AtGRP7 regulates the circadian oscillations of its own transcript. Gene expression is induced by…	-3.31153	1.12729	2.78665e-06	0.00254214
208859	27.4	RNA.RNA binding	|MERCATOR: (loc_os03g17010.1 : 71.2) no description available & (at5g59950 : 51.2) RNA-binding (RRM/RBD/RNP motifs) family protein; FUNCTIONS IN: nucleotide binding, nucleic acid binding; INVOLVED IN: biological_process unknown; LOCATED IN: chloroplast; EXPRESSED IN: 25 plant structures; EXPRESSED DURING: 15 growth stages; CONTAINS InterPro DOMAIN/s: RNA recognition motif, RNP-1 (InterPro:IPR0005…	-9.36001	-0.462663	0.000407731	0.0365314
42683	28.1.1	DNA.synthesis/chromatin structure.retrotransposon/transposase	|MERCATOR: (loc_os02g03640.1 : 334.0) no description available & (at3g30200 : 70.9) Plant transposase (Ptta/En/Spm family); FUNCTIONS IN: molecular_function unknown; INVOLVED IN: biological_process unknown; LOCATED IN: cellular_component unknown; EXPRESSED IN: cultured cell; CONTAINS InterPro DOMAIN/s: Transposase, Ptta/En/Spm, plant (InterPro:IPR004252); BEST Arabidopsis thaliana protein match i…	-11.0513	1.15776	4.56706e-05	0.0116516
54891	28.1.3.1	DNA.synthesis/chromatin structure.histone.H1	|MERCATOR: (p27806|h1_wheat : 65.1) Histone H1 - Triticum aestivum (Wheat) & (loc_os03g58470.1 : 63.9) no description available & (at2g30620 : 58.5) winged-helix DNA-binding transcription factor family protein; FUNCTIONS IN: DNA binding; INVOLVED IN: nucleosome assembly; LOCATED IN: nucleus, nucleosome; EXPRESSED IN: 23 plant structures; EXPRESSED DURING: 13 growth stages; CONTAINS InterPro DOMAI…	-3.01129	1.69958	3.05997e-06	0.00270938
29441	28.1.3	DNA.synthesis/chromatin structure.histone	|MERCATOR: (original description: no original description)||TAGI: TC436041;UniRef100_P68428 Cluster: Histone H3.2; n=5; Magnoliophyta;Rep: Histone H3.2 - Triticum aestivum (Wheat), partial (44%);Evalue=2E-108;%ident=100|MAPMANSTORE: very weakly similar to (99.0) AT5G65360 ; Symbols: ; histone H3 ; chr5:26120099-26120509 REVERSEvery weakly similar to ( 100) H32_WHEAT Histone H3.2 - Triticum aestiv…	-8.45051	-1.22871	0.000488948	0.039957
22244	28.1	DNA.synthesis/chromatin structure	|MERCATOR: (original description: no original description)||TAGI: AL826735;weakly similar to UniRef100_A7P407 Cluster: Chromosome chr1 scaffold_5, whole genome shotgun sequence; n=1; Vitis vinifera;Rep: Chromosome chr1 scaffold_5, whole genome shotgun sequence - Vitis vinifera (Grape), partial (23%);Evalue=9E-67;%ident=88.94|MAPMANSTORE: very weakly similar to ( 100) AT2G01900 ; Symbols: ; endonu…	-3.37316	-1.30074	0.000334919	0.0327356
40740	28.1	DNA.synthesis/chromatin structure	|MERCATOR: (loc_os08g33190.1 : 130.0) no description available & (at1g14900 : 95.1) Encodes a protein belonging to the subgroup of HMGA (high mobility group A) proteins that interact with A/T-rich stretches of DNA.; high mobility group A (HMGA); FUNCTIONS IN: DNA binding; INVOLVED IN: regulation of transcription, DNA-dependent, nucleosome assembly; LOCATED IN: cytosol, nuclear chromatin, nucleus;…	-3.73792	-0.25562	4.43847e-05	0.0114256
43272	28.1	DNA.synthesis/chromatin structure	|MERCATOR: (loc_os02g47150.1 : 88.2) no description available & (at3g23890 : 80.1) Encodes a topoisomerase II that is highly expressed in young seedlings. The protein is localized in the nucleus and gene expression levels are increased in proliferative tissues.; topoisomerase II (TOPII); CONTAINS InterPro DOMAIN/s: DNA topoisomerase, type IIA, subunit A/C-terminal (InterPro:IPR002205), DNA topois…	-8.8444	-0.955173	0.00026475	0.0287073
49389	28.1	DNA.synthesis/chromatin structure	|MERCATOR: (loc_os12g06230.1 : 113.0) no description available & (gnl|cdd|38301 : 53.9) no description available & (at2g05642 : 44.7) Nucleic acid-binding, OB-fold-like protein; CONTAINS InterPro DOMAIN/s: Nucleic acid-binding, OB-fold (InterPro:IPR012340), Nucleic acid-binding, OB-fold-like (InterPro:IPR016027), Protein of unknown function DUF223 (InterPro:IPR003871), Replication factor A, C-ter…	-8.9497	1.04702	0.000105995	0.0185058
177363	28.1	DNA.synthesis/chromatin structure	|MERCATOR: (loc_os07g06630.1 : 153.0) no description available & (at2g02650 : 65.5) Ribonuclease H-like superfamily protein; FUNCTIONS IN: nucleic acid binding; INVOLVED IN: biological_process unknown; LOCATED IN: cellular_component unknown; EXPRESSED IN: sperm cell; CONTAINS InterPro DOMAIN/s: Polynucleotidyl transferase, ribonuclease H fold (InterPro:IPR012337), RNA-directed DNA polymerase (rev…	-9.90414	0.0535136	0.000198571	0.0247531
48687	28.2	DNA.repair	|MERCATOR: (loc_os02g40200.2 : 254.0) no description available & (at3g47090 : 143.0) Leucine-rich repeat protein kinase family protein; FUNCTIONS IN: protein serine/threonine kinase activity, kinase activity, ATP binding; INVOLVED IN: transmembrane receptor protein tyrosine kinase signaling pathway, protein amino acid phosphorylation; LOCATED IN: chloroplast; CONTAINS InterPro DOMAIN/s: Protein k…	-4.29748	1.29197	0.000167534	0.0227185
512	28.99	DNA.unspecified	|MERCATOR: (loc_os06g42380.1 : 64.3) no description available & (at4g29090 : 54.7) Ribonuclease H-like superfamily protein; FUNCTIONS IN: RNA binding, RNA-directed DNA polymerase activity, nucleic acid binding; INVOLVED IN: RNA-dependent DNA replication; LOCATED IN: endomembrane system; CONTAINS InterPro DOMAIN/s: Polynucleotidyl transferase, ribonuclease H fold (InterPro:IPR012337), RNA-directed…	2.62577	0.483033	1.45877e-05	0.00618529
7042	28.99	DNA.unspecified	|MERCATOR: (loc_os07g48470.1 : 162.0) no description available & (at4g29090 : 82.0) Ribonuclease H-like superfamily protein; FUNCTIONS IN: RNA binding, RNA-directed DNA polymerase activity, nucleic acid binding; INVOLVED IN: RNA-dependent DNA replication; LOCATED IN: endomembrane system; CONTAINS InterPro DOMAIN/s: Polynucleotidyl transferase, ribonuclease H fold (InterPro:IPR012337), RNA-directe…	-7.28928	0.106965	0.000350819	0.0337406
34746	28.99	DNA.unspecified	|MERCATOR: (original description: no original description)||TAGI: TC383358;weakly similar to UniRef100_A8J7Y3 Cluster: Predicted protein; n=1; Chlamydomonas reinhardtii;Rep: Predicted protein - Chlamydomonas reinhardtii, partial (4%);Evalue=0;%ident=99.83|MAPMANSTORE: very weakly similar to (85.1) loc_os04g04390 12004.m05745 protein retrotransposon protein, putative, unclassified, expressed weakl…	-7.53355	-0.356012	1.89046e-05	0.00734342
39603	28.99	DNA.unspecified	|MERCATOR: (loc_os06g13740.1 : 306.0) no description available & (at4g38180 : 189.0) FAR1-related sequence 5 (FRS5); FUNCTIONS IN: zinc ion binding; INVOLVED IN: response to red or far red light; LOCATED IN: cellular_component unknown; EXPRESSED IN: 22 plant structures; EXPRESSED DURING: 13 growth stages; CONTAINS InterPro DOMAIN/s: MULE transposase, conserved domain (InterPro:IPR018289), Transcr…	-8.18216	0.196856	0.000419398	0.0368635
52219	28.99	DNA.unspecified	|MERCATOR: (loc_os08g06020.1 : 73.9) no description available & (at4g00170 : 66.2) Plant VAMP (vesicle-associated membrane protein) family protein; FUNCTIONS IN: structural molecule activity; INVOLVED IN: biological_process unknown; LOCATED IN: cellular_component unknown; EXPRESSED IN: 24 plant structures; EXPRESSED DURING: 14 growth stages; CONTAINS InterPro DOMAIN/s: PapD-like (InterPro:IPR0089…	2.52635	-0.743308	0.000374827	0.0351034
53451	28.99	DNA.unspecified	|MERCATOR: (original description: no original description)||TAGI: TC427989;weakly similar to UniRef100_A9DBG4 Cluster: OmpA/MotB; n=1; Hoeflea phototrophica DFL-43;Rep: OmpA/MotB - Hoeflea phototrophica DFL-43, partial (4%);Evalue=3E-111;%ident=92.81|MAPMANSTORE: weakly similar to UniRef100_A9DBG4 Cluster: OmpA/MotB; n=1; Hoeflea phototrophica DFL-43;Rep: OmpA/MotB - Hoeflea phototrophica DFL-43,…	-4.70215	0.0878338	0.000659644	0.0470018
56249	28.99	DNA.unspecified	|MERCATOR: (loc_os01g38620.2 : 180.0) no description available & (at2g25910 : 155.0) 3-5' exonuclease domain-containing protein / K homology domain-containing protein / KH domain-containing protein; FUNCTIONS IN: 3'-5' exonuclease activity, RNA binding, nucleic acid binding; INVOLVED IN: nucleobase, nucleoside, nucleotide and nucleic acid metabolic process; LOCATED IN: intracellular; EXPRESSED IN…	-9.33519	1.33339	0.000120472	0.0194986
60019	28.99	DNA.unspecified	|MERCATOR: (loc_os10g34860.1 : 379.0) no description available & (p08770|tra1_maize : 186.0) Putative AC transposase (ORFA) - Zea mays (Maize) & (at3g42170 : 152.0) transposase-like gene with conserved domains from the family of hAT transposases that includes hobo from Drosophila melanogaster, Activator (Ac) from maize, and Tam3 from snapdragon but lacks several amino acids known to be essential …	-8.06422	1.4652	0.000244753	0.0275446
60146	28.99	DNA.unspecified	|MERCATOR: (original description: no original description)||TAGI: TC386257;;Evalue=0;%ident=98.78|MAPMANSTORE: weakly similar to ( 107) loc_os10g12174 12010.m04531 protein retrotransposon protein, putative, unclassified, expressed||BREAD.WHEAT.TIGR: TA55139_4565; TA55139_4565; Evalue=0; %ident=100||BRACHYPODIUM GENOME: Bradi1g19327.1 ; weakly similar to ( 168) AT5G28780 | Symbols: | unknown prote…	-3.59835	2.71116	0.000336034	0.0327544
358008	28.99	DNA.unspecified	|MERCATOR: (loc_os06g13740.1 : 84.0) no description available & (at4g15090 : 53.1) Encodes a nuclear localized protein involved in far red light response signaling. Loss of function mutants are defective in far red light responses. Interacts with homologous gene FHY3.; FAR-RED IMPAIRED RESPONSE 1 (FAR1); CONTAINS InterPro DOMAIN/s: MULE transposase, conserved domain (InterPro:IPR018289), Zinc fin…	-9.11861	-0.714327	0.000415401	0.0366398
25214	29.1.7	protein.aa activation.alanine-tRNA ligase	|MERCATOR: (original description: no original description)||TAGI: CA497112;similar to UniRef100_A7P2X5 Cluster: Chromosome chr1 scaffold_5, whole genome shotgun sequence; n=1; Vitis vinifera;Rep: Chromosome chr1 scaffold_5, whole genome shotgun sequence - Vitis vinifera (Grape), partial (55%);Evalue=4E-70;%ident=91.13|MAPMANSTORE: weakly similar to ( 108) AT1G50200 ; Symbols: ALATS, ACD ; ALATS (…	-4.0093	-0.413334	2.61358e-05	0.00899206
68068	29.2.1.1.3.1.5	protein.synthesis.ribosomal protein.prokaryotic.unknown organellar.30S subunit.S5	|MERCATOR: (original description: no original description)||TAGI: TC404621;weakly similar to UniRef100_A7PJH9 Cluster: Chromosome chr12 scaffold_18, whole genome shotgun sequence; n=1; Vitis vinifera;Rep: Chromosome chr12 scaffold_18, whole genome shotgun sequence - Vitis vinifera (Grape), partial (5%);Evalue=0;%ident=97.54|MAPMANSTORE: weakly similar to UniRef100_A7PJH9 Cluster: Chromosome chr12…	-7.16872	2.21236	8.05168e-05	0.0161725
44150	29.2.2.1	protein.synthesis.ribosome biogenesis.export from nucleus	|MERCATOR: (loc_os09g39910.3 : 86.7) no description available & (at5g60790 : 78.2) member of GCN subfamily; GENERAL CONTROL NON-REPRESSIBLE 1 (GCN1); FUNCTIONS IN: transporter activity; LOCATED IN: plasma membrane; EXPRESSED IN: 24 plant structures; EXPRESSED DURING: 15 growth stages; CONTAINS InterPro DOMAIN/s: ATPase, AAA+ type, core (InterPro:IPR003593), ABC transporter-like (InterPro:IPR00343…	-9.82432	-0.0441451	0.000180813	0.0236664
49157	29.2.3	protein.synthesis.initiation	|MERCATOR: (loc_os07g36200.1 : 83.6) no description available & (at1g11480 : 60.5) eukaryotic translation initiation factor-related; FUNCTIONS IN: molecular_function unknown; INVOLVED IN: biological_process unknown; LOCATED IN: cellular_component unknown; EXPRESSED IN: 23 plant structures; EXPRESSED DURING: 15 growth stages; Has 398 Blast hits to 374 proteins in 109 species: Archae - 0; Bacteria …	-6.2442	-0.524179	0.000139323	0.0207636
36138	29.3.3	protein.targeting.chloroplast	|MERCATOR: (original description: no original description)||TAGI: TC441617;;Evalue=1E-132;%ident=96.52|MAPMANSTORE: very weakly similar to (88.6) loc_os06g11020 12006.m05819 protein tic22, putative, expressed||BREAD.WHEAT.TIGR: TA100613_4565; TA100613_4565; Evalue=2E-132; %ident=96.52|	-8.04892	0.0729866	0.000295369	0.0303998
135953	29.3.3	protein.targeting.chloroplast	|MERCATOR: (original description: no original description)||BRACHYPODIUM GENOME: Bradi1g45996.1 ; moderately similar to ( 252) AT4G33350 | Symbols: | chloroplast inner membrane import protein Tic22, putative | chr4:16064638-16066715 REVERSEmoderately similar to ( 269) loc_os06g11020 12006.m05819 protein tic22, putative, expressedTic22 no original description||RICE GENOME: Loc_Os06g11020.1 ; 12006…	-2.39436	-0.126093	0.000525019	0.0412905
53583	29.3.4.3	protein.targeting.secretory pathway.vacuole	|MERCATOR: (loc_os04g52190.1 : 240.0) no description available & (at2g14740 : 213.0) Encodes a vacuolar sorting receptor that participates in vacuolar sorting in vegetative tissues and in seeds.; vaculolar sorting receptor 3 (VSR3); FUNCTIONS IN: calcium ion binding; INVOLVED IN: intracellular protein transport, protein targeting to vacuole; LOCATED IN: integral to plasma membrane, Golgi transpor…	-2.97521	1.53389	9.239e-10	2.78136e-05
34699	29.3.4.99	protein.targeting.secretory pathway.unspecified	|MERCATOR: (at5g14670 : 157.0) A member of ARF GTPase family. Arabidopsis has 21 members of this family, known to be essential for vesicle coating and uncoating and functions in GTP-binding. Gene encoding ADP-ribosylation factor and similar to ADP-ribosylation factor DcARF1 (GI:965483) (Daucus carota), other ARFs and ARF-like proteins. The gene is shown to play a role in cell division, cell expan…	-4.02794	1.54463	0.000117956	0.0194407
30085	29.4.1.55	protein.postranslational modification.kinase.receptor like cytoplasmatic kinase V	|MERCATOR: (loc_os04g30030.1 : 92.0) no description available & (at4g11530 : 77.4) Encodes a cysteine-rich receptor-like protein kinase.; cysteine-rich RLK (RECEPTOR-like protein kinase) 34 (CRK34); FUNCTIONS IN: kinase activity; INVOLVED IN: protein amino acid phosphorylation; LOCATED IN: endomembrane system; EXPRESSED IN: 10 plant structures; EXPRESSED DURING: 8 growth stages; CONTAINS InterPro…	-9.20464	-0.623079	0.000437473	0.0377902
41767	29.4.1.55	protein.postranslational modification.kinase.receptor like cytoplasmatic kinase V	|MERCATOR: (loc_os11g06780.1 : 91.3) no description available & (gnl|cdd|36433 : 59.3) no description available & (at1g11050 : 42.0) Protein kinase superfamily protein; FUNCTIONS IN: kinase activity; INVOLVED IN: protein amino acid phosphorylation; LOCATED IN: endomembrane system; EXPRESSED IN: 18 plant structures; EXPRESSED DURING: 10 growth stages; CONTAINS InterPro DOMAIN/s: Protein kinase, AT…	-2.49961	0.120438	0.000126793	0.0200302
53493	29.4.1.55	protein.postranslational modification.kinase.receptor like cytoplasmatic kinase V	|MERCATOR: (loc_os04g30040.2 : 119.0) no description available & (at1g67720 : 86.3) Leucine-rich repeat protein kinase family protein; FUNCTIONS IN: protein kinase activity, kinase activity; INVOLVED IN: protein amino acid phosphorylation; LOCATED IN: endomembrane system; EXPRESSED IN: 21 plant structures; EXPRESSED DURING: 13 growth stages; CONTAINS InterPro DOMAIN/s: Protein kinase, ATP binding…	-6.52163	-0.444668	3.52656e-05	0.0105114
1118	29.4.1.57	protein.postranslational modification.kinase.receptor like cytoplasmatic kinase VII	|MERCATOR: (original description: no original description)||BRACHYPODIUM GENOME: Bradi4g10610.1 ; moderately similar to ( 249) AT3G55950 | Symbols: CCR3, ATCRR3 | CCR3 (ARABIDOPSIS THALIANA CRINKLY4 RELATED 3); kinase | chr3:20753903-20756347 REVERSEmoderately similar to ( 209) CRI4_MAIZE Putative receptor protein kinase CRINKLY4 precursor (EC 2.7.11.1) - Zea mays (Maize)moderately similar to ( 4…	-9.00928	1.01096	9.39181e-05	0.0173457
32270	29.4.1.57	protein.postranslational modification.kinase.receptor like cytoplasmatic kinase VII	|MERCATOR: (original description: no original description)||TAGI: TC394619;similar to UniRef100_Q0JEA1 Cluster: Os04g0307500 protein; n=1; Oryza sativa Japonica Group;Rep: Os04g0307500 protein - Oryza sativa subsp. japonica (Rice), partial (55%);Evalue=0;%ident=99.54|MAPMANSTORE: moderately similar to ( 314) AT1G79670 ; Symbols: RFO1, WAKL22 ; RFO1 (RESISTANCE TO FUSARIUM OXYSPORUM 1); kinase ; c…	-7.0262	0.795592	8.60996e-05	0.0166153
49953	29.4.1.57	protein.postranslational modification.kinase.receptor like cytoplasmatic kinase VII	|MERCATOR: (loc_os10g22484.3 : 386.0) no description available & (at1g69790 : 176.0) Protein kinase superfamily protein; FUNCTIONS IN: protein serine/threonine kinase activity, protein kinase activity, kinase activity, ATP binding; INVOLVED IN: protein amino acid phosphorylation; LOCATED IN: chloroplast; EXPRESSED IN: 13 plant structures; EXPRESSED DURING: 6 growth stages; CONTAINS InterPro DOMAI…	-9.35136	3.10311	0.000157784	0.0220341
56320	29.4.1.57	protein.postranslational modification.kinase.receptor like cytoplasmatic kinase VII	|MERCATOR: (loc_os06g50100.1 : 273.0) no description available & (at5g47070 : 178.0) Protein kinase superfamily protein; FUNCTIONS IN: protein serine/threonine kinase activity, protein kinase activity, kinase activity, ATP binding; INVOLVED IN: protein amino acid phosphorylation; LOCATED IN: plasma membrane; EXPRESSED IN: 22 plant structures; EXPRESSED DURING: 13 growth stages; CONTAINS InterPro …	-2.202	0.941675	8.54782e-05	0.0165484
28683	29.4	protein.postranslational modification	|MERCATOR: (original description: no original description)||BRACHYPODIUM GENOME: Bradi2g38640.1 ; moderately similar to ( 375) AT3G62260 | Symbols: | protein phosphatase 2C, putative / PP2C, putative | chr3:23038516-23040391 REVERSEhighly similar to ( 560) loc_os05g04360 12005.m04969 protein protein phosphatase 2C homolog 2, putative, expressed PP2Cc PP2Cc PP2C PTC1 no original description||RICE …	-8.15898	-1.5364	0.000605927	0.0448185
28965	29.4	protein.postranslational modification	|MERCATOR: (loc_os03g16170.1 : 125.0) no description available & (at1g07430 : 80.5) highly ABA-induced PP2C gene 2 (HAI2); FUNCTIONS IN: protein serine/threonine phosphatase activity, catalytic activity; INVOLVED IN: protein amino acid dephosphorylation; LOCATED IN: protein serine/threonine phosphatase complex; EXPRESSED IN: 17 plant structures; EXPRESSED DURING: 9 growth stages; CONTAINS InterPr…	-6.97195	-1.24199	1.41355e-05	0.00612292
31194	29.4	protein.postranslational modification	|MERCATOR: (loc_os01g66610.1 : 222.0) no description available & (at2g19130 : 130.0) S-locus lectin protein kinase family protein; FUNCTIONS IN: protein serine/threonine kinase activity, sugar binding, protein kinase activity, ATP binding; INVOLVED IN: protein amino acid phosphorylation, recognition of pollen; LOCATED IN: endomembrane system; EXPRESSED IN: 19 plant structures; EXPRESSED DURING: 1…	-2.24057	-0.16562	0.000145343	0.0211887
[truncated: 447 more rows]

## Sheet: Elevated CO2 & temp. FDR<0.05
Supplementary Table 4. (C) Differentially expressed transcripts under elevated [CO2] and high temperature (EC-HT) relative to the treatment under ambient [CO2] and temperature (AC-AT) considering a FDR value <0.05 and a fold-change <-2 or >2 for down or upregulated genes, respectively.
[truncated: 331 more rows]
