# Supplementary material for: De Novo Transcriptome Analysis of Durum Wheat Flag Leaves Provides New Insights Into the Regulatory Response to Elevated CO2 and High Temperature
Source: Front Plant Sci. 2019 Dec 6;10:1605. doi: 10.3389/fpls.2019.01605 (PMC6915051; doi:10.3389/fpls.2019.01605)
Supplement: Supplementary file 3 [file DataSheet_3.xlsx]

## Sheet: Elevated CO2
Supplementary Table 5. (A) Gene ontology categories for the differentially expressed transcripts under elevated [CO2] (EC-AT) relative to the treatment under ambient [CO2] and temperature (AC-AT). Gene ontology terms were also displayed on ReviGO attending to molecular functions, cellular components and biological processes.
Ontology	term_ID	description	frequency	plot_X	plot_Y	plot_size	log10 p-value	uniqueness	dispensability	representative	eliminated
Cellular Component	GO:0000943	retrotransposon nucleocapsid	0	7.13	-2.061	1.973	-3.0004	0.697	0.502	943	0
Molecular Function	GO:0047522	15-oxoprostaglandin 13-oxidase activity	0	-0.098	-7.101	1.699	-3.0004	0.911	0.013	47522	0
Molecular Function	GO:0047938	glucose-6-phosphate 1-epimerase activity	0	0.675	1.875	2.158	-2.2223	0.946	0.014	47938	0
Molecular Function	GO:0010331	gibberellin binding	0	4.463	1.179	0.699	-3.0004	0.937	0.105	10331	0
Molecular Function	GO:0016262	protein N-acetylglucosaminyltransferase activity	0	-5.489	5.185	2.204	-2.5233	0.891	0.147	16262	0
Molecular Function	GO:0050734	hydroxycinnamoyltransferase activity	0	-5.665	-2.069	1.663	-3.0004	0.875	0.277	50734	0
Biological Process	GO:0010183	pollen tube guidance	0	-6.838	0.933	2.1	-3.0004	0.686	0	10183	0
Biological Process	GO:0080092	regulation of pollen tube growth	0	null	null	2.072	-3.0004	0.677	0.802	10183	1
Biological Process	GO:0032197	transposition, RNA-mediated	0	0.174	-0.734	2.127	-3.0004	0.94	0.043	32197	0
Biological Process	GO:0051555	flavonol biosynthetic process	0	null	null	2.004	-2.3984	0.901	0.857	9813	1
Biological Process	GO:0042617	paclitaxel biosynthetic process	0	5.652	-0.548	1.204	-3.0004	0.885	0.143	42617	0
Biological Process	GO:0015692	lead ion transport	0	1.499	6.583	1.204	-3.0004	0.911	0.154	15692	0
Biological Process	GO:0009992	cellular water homeostasis	0	-0.992	4.636	1.996	-3.0004	0.84	0.267	9992	0
Biological Process	GO:0010193	response to ozone	0	-8.568	-0.38	2.13	-3.0004	0.789	0.358	10193	0
Biological Process	GO:0080110	sporopollenin biosynthetic process	0	null	null	2.076	-2.5233	0.748	0.932	9555	1
Biological Process	GO:0009556	microsporogenesis	0	null	null	2.393	-3.0004	0.775	0.837	9555	1
Biological Process	GO:0071366	cellular response to indolebutyric acid stimulus	0	-7.715	-0.629	0.845	-3.0004	0.798	0.554	71366	0
Biological Process	GO:0052544	defense response by callose deposition in cell wall	0	null	null	2.041	-3.0004	0.691	0.922	52542	1
Biological Process	GO:0010345	suberin biosynthetic process	0	null	null	1.806	-2.6994	0.89	0.812	9809	1
Biological Process	GO:0009870	defense response signaling pathway, resistance gene-dependent	0	-6.534	0.239	2	-3.0004	0.74	0.608	9870	0
Biological Process	GO:0048657	anther wall tapetum cell differentiation	0	null	null	1.681	-3.0004	0.793	0.779	10228	1
Biological Process	GO:0030476	ascospore wall assembly	0	-0.783	4.07	2.164	-3.0004	0.709	0.647	30476	0
Biological Process	GO:0009939	positive regulation of gibberellic acid mediated signaling pathway	0	null	null	1.544	-3.0004	0.706	0.887	9740	1
Cellular Component	GO:0000164	protein phosphatase type 1 complex	1e-05	4.864	5.814	2.435	-3.0004	0.753	0.257	164	0
Cellular Component	GO:0005775	vacuolar lumen	1e-05	7.848	-0.296	2.322	-3.0004	0.644	0.277	5775	0
Molecular Function	GO:0046972	histone acetyltransferase activity (H4-K16 specific)	1e-05	-6.707	-2.662	2.483	-3.0004	0.822	0.153	46972	0
Molecular Function	GO:0043996	histone acetyltransferase activity (H4-K8 specific)	1e-05	null	null	2.481	-3.0004	0.822	0.95	46972	1
Molecular Function	GO:0043995	histone acetyltransferase activity (H4-K5 specific)	1e-05	null	null	2.481	-3.0004	0.822	0.95	46972	1
Biological Process	GO:0009846	pollen germination	1e-05	null	null	2.571	-3.0004	0.801	0.85	10183	1
Biological Process	GO:0009718	anthocyanin-containing compound biosynthetic process	1e-05	null	null	2.735	-2.5233	0.902	0.925	9813	1
Biological Process	GO:0009963	positive regulation of flavonoid biosynthetic process	1e-05	null	null	2.679	-2.3015	0.859	0.919	9813	1
Biological Process	GO:0009686	gibberellin biosynthetic process	1e-05	null	null	2.591	-2.5233	0.872	0.837	42617	1
Biological Process	GO:0051510	regulation of unidimensional cell growth	1e-05	null	null	2.829	-3.0004	0.736	0.907	10075	1
Biological Process	GO:0010584	pollen exine formation	1e-05	null	null	2.728	-3.0004	0.757	0.867	9555	1
Biological Process	GO:0009688	abscisic acid biosynthetic process	1e-05	5.718	-1.235	2.691	-2.6994	0.865	0.526	9688	0
Biological Process	GO:0010583	response to cyclopentenone	1e-05	-8.239	-0.392	2.843	-3.0004	0.801	0.553	10583	0
Biological Process	GO:0010286	heat acclimation	1e-05	null	null	2.799	-2.6994	0.818	0.724	9651	1
Biological Process	GO:0042753	positive regulation of circadian rhythm	1e-05	-3.858	1.258	2.59	-2.6994	0.899	0.575	42753	0
Biological Process	GO:0006977	DNA damage response, signal transduction by p53 class mediator resulting in cell cycle arrest	1e-05	-6.234	0.55	2.66	-3.0004	0.706	0.581	6977	0
Biological Process	GO:0052542	defense response by callose deposition	1e-05	-6.569	3.569	2.615	-3.0004	0.781	0.585	52542	0
Biological Process	GO:0002238	response to molecule of fungal origin	1e-05	null	null	2.635	-3.0004	0.76	0.862	51707	1
Biological Process	GO:0009816	defense response to bacterium, incompatible interaction	1e-05	null	null	2.403	-3.0004	0.775	0.875	51707	1
Biological Process	GO:0009809	lignin biosynthetic process	1e-05	3.393	-1.21	2.55	-3.0004	0.882	0.587	9809	0
Biological Process	GO:0009805	coumarin biosynthetic process	1e-05	null	null	2.582	-2.3984	0.881	0.874	9809	1
Biological Process	GO:0002679	respiratory burst involved in defense response	1e-05	-7.201	-1.199	2.866	-3.0004	0.792	0.605	2679	0
Biological Process	GO:0048653	anther development	1e-05	null	null	2.849	-3.0004	0.793	0.969	10228	1
Biological Process	GO:0007141	male meiosis I	1e-05	null	null	2.759	-3.0004	0.831	0.88	30476	1
Biological Process	GO:0042989	sequestering of actin monomers	1e-05	-0.65	5.749	2.531	-3.0004	0.739	0.647	42989	0
Biological Process	GO:0009742	brassinosteroid mediated signaling pathway	1e-05	-7.327	0.534	2.458	-3.0004	0.714	0.651	9742	0
Biological Process	GO:0009825	multidimensional cell growth	1e-05	-0.491	0.457	2.796	-3.0004	0.902	0.653	9825	0
Biological Process	GO:0009741	response to brassinosteroid	1e-05	null	null	2.851	-3.0004	0.783	0.828	10200	1
Biological Process	GO:0009740	gibberellic acid mediated signaling pathway	1e-05	-7.33	0.559	2.786	-3.0004	0.698	0.675	9740	0
Biological Process	GO:0010476	gibberellin mediated signaling pathway	1e-05	null	null	2.787	-3.0004	0.698	1	9740	1
Biological Process	GO:0009739	response to gibberellin	1e-05	-7.929	-0.471	2.867	-3.0004	0.779	0.689	9739	0
Cellular Component	GO:0009705	plant-type vacuole membrane	2e-05	null	null	2.674	-2.6994	0.6	0.81	5775	1
Molecular Function	GO:0030507	spectrin binding	2e-05	5.56	-3.175	2.869	-3.0004	0.923	0.365	30507	0
Molecular Function	GO:0004965	G-protein coupled GABA receptor activity	2e-05	6.605	1.658	3.001	-2.2223	0.941	0.564	4965	0
Biological Process	GO:0010218	response to far red light	2e-05	-7.897	-1.99	3.01	-3.0004	0.821	0.187	10218	0
Biological Process	GO:0009585	red, far-red light phototransduction	2e-05	null	null	3.053	-3.0004	0.714	0.867	10218	1
Biological Process	GO:0010114	response to red light	2e-05	null	null	2.987	-3.0004	0.822	0.861	10218	1
Biological Process	GO:0010017	red or far-red light signaling pathway	2e-05	null	null	3.094	-3.0004	0.733	0.995	10218	1
Biological Process	GO:0006301	postreplication repair	2e-05	-6.579	-3.623	2.985	-2.6994	0.753	0.368	6301	0
Biological Process	GO:0016926	protein desumoylation	2e-05	0.774	-5.538	2.979	-3.0004	0.904	0.384	16926	0
Biological Process	GO:0009860	pollen tube growth	2e-05	null	null	3.084	-3.0004	0.685	0.932	10075	1
Biological Process	GO:0043090	amino acid import	2e-05	2.115	7.252	2.978	-2.3984	0.891	0.473	43090	0
Biological Process	GO:0006693	prostaglandin metabolic process	2e-05	null	null	2.988	-3.0004	0.882	0.918	6691	1
Biological Process	GO:0048527	lateral root development	2e-05	null	null	2.885	-3.0004	0.808	0.821	10228	1
Biological Process	GO:0048767	root hair elongation	2e-05	null	null	3.01	-3.0004	0.772	0.951	10228	1
Biological Process	GO:0016045	detection of bacterium	2e-05	-7.237	-0.625	2.944	-3.0004	0.802	0.66	16045	0
Biological Process	GO:0010167	response to nitrate	2e-05	null	null	2.92	-3.0004	0.787	0.732	10200	1
Biological Process	GO:0016132	brassinosteroid biosynthetic process	2e-05	3.005	0.142	2.947	-2.6994	0.829	0.696	16132	0
Cellular Component	GO:0031941	filamentous actin	3e-05	5.872	2.835	2.899	-2.6994	0.629	0.592	31941	0
Biological Process	GO:0009697	salicylic acid biosynthetic process	3e-05	5.478	-1.652	3.108	-3.0004	0.867	0	9697	0
Biological Process	GO:0006075	(1-&gt;3)-beta-D-glucan biosynthetic process	3e-05	2.566	-3.747	3.168	-3.0004	0.881	0.203	6075	0
Biological Process	GO:0002181	cytoplasmic translation	3e-05	1.873	-5.996	3.139	-2.6994	0.907	0.253	2181	0
Biological Process	GO:0010075	regulation of meristem growth	3e-05	-3.727	3.542	3.166	-3.0004	0.754	0.412	10075	0
Biological Process	GO:0009932	cell tip growth	3e-05	null	null	3.231	-3.0004	0.769	0.86	10075	1
Biological Process	GO:0031408	oxylipin biosynthetic process	3e-05	5.573	-1.275	3.102	-3.0004	0.869	0.451	31408	0
Biological Process	GO:0045214	sarcomere organization	3e-05	null	null	3.146	-2.6994	0.757	0.81	7020	1
Biological Process	GO:0006691	leukotriene metabolic process	3e-05	5.809	-0.906	3.205	-3.0004	0.879	0.488	6691	0
Biological Process	GO:0009954	proximal/distal pattern formation	3e-05	-1.379	2.845	3.107	-3.0004	0.831	0.51	9954	0
Biological Process	GO:0009630	gravitropism	3e-05	-8.085	-1.577	3.098	-2.5233	0.809	0.579	9630	0
Biological Process	GO:0009407	toxin catabolic process	3e-05	2.527	-1.933	3.095	-3.0004	0.906	0.623	9407	0
Biological Process	GO:0010103	stomatal complex morphogenesis	3e-05	null	null	3.205	-3.0004	0.794	0.797	10228	1
Biological Process	GO:0010162	seed dormancy process	3e-05	null	null	3.143	-3.0004	0.787	0.771	10228	1
Biological Process	GO:0048443	stamen development	3e-05	null	null	3.143	-3.0004	0.787	0.906	10228	1
Biological Process	GO:0048481	ovule development	3e-05	null	null	3.21	-3.0004	0.787	0.777	10228	1
Biological Process	GO:0009862	systemic acquired resistance, salicylic acid mediated signaling pathway	3e-05	null	null	3.161	-3.0004	0.616	0.981	10200	1
Cellular Component	GO:0010287	plastoglobule	4e-05	null	null	2.955	-2.3015	0.612	0.854	9570	1
Biological Process	GO:0006890	retrograde vesicle-mediated transport, Golgi to ER	4e-05	null	null	3.318	-3.0004	0.883	0.828	6888	1
Biological Process	GO:0010363	regulation of plant-type hypersensitive response	4e-05	null	null	3.325	-3.0004	0.702	0.735	12501	1
Biological Process	GO:0009813	flavonoid biosynthetic process	4e-05	0.61	-1.701	3.311	-3.0004	0.942	0.126	9813	0
Biological Process	GO:0034332	adherens junction organization	4e-05	null	null	3.3	-2.6994	0.86	0.935	34329	1
Biological Process	GO:0006623	protein targeting to vacuole	4e-05	0.64	7.235	3.267	-2.3984	0.881	0.606	6623	0
Biological Process	GO:0048444	floral organ morphogenesis	4e-05	null	null	3.28	-3.0004	0.785	0.9	10228	1
Biological Process	GO:0048765	root hair cell differentiation	4e-05	null	null	3.296	-3.0004	0.782	0.982	10228	1
Biological Process	GO:0009845	seed germination	4e-05	null	null	3.292	-3.0004	0.811	0.785	10228	1
Biological Process	GO:0009965	leaf morphogenesis	4e-05	null	null	3.328	-3.0004	0.805	0.912	10228	1
Biological Process	GO:0010200	response to chitin	4e-05	-8.446	-0.41	3.243	-3.0004	0.782	0.672	10200	0
Biological Process	GO:0071230	cellular response to amino acid stimulus	4e-05	null	null	3.28	-2.6994	0.748	0.813	10200	1
Biological Process	GO:0009738	abscisic acid-activated signaling pathway	4e-05	null	null	3.263	-3.0004	0.684	0.868	10200	1
Biological Process	GO:0009867	jasmonic acid mediated signaling pathway	4e-05	null	null	3.259	-3.0004	0.686	0.782	10200	1
Biological Process	GO:0009863	salicylic acid mediated signaling pathway	4e-05	null	null	3.328	-3.0004	0.684	0.811	10200	1
Biological Process	GO:0009644	response to high light intensity	4e-05	-7.711	-1.768	3.301	-3.0004	0.82	0.678	9644	0
Cellular Component	GO:0043197	dendritic spine	5e-05	-0.165	-4.029	3.111	-3.0004	0.945	0.018	43197	0
Cellular Component	GO:0000795	synaptonemal complex	5e-05	6.699	-1.51	3.044	-3.0004	0.635	0.573	795	0
Molecular Function	GO:0032440	2-alkenal reductase [NAD(P)] activity	5e-05	0.561	-6.879	3.378	-2.3984	0.902	0.489	32440	0
Biological Process	GO:0009626	plant-type hypersensitive response	5e-05	null	null	3.377	-3.0004	0.73	0.992	12501	1
Biological Process	GO:0009723	response to ethylene	5e-05	-7.832	-0.425	3.385	-3.0004	0.784	0.356	9723	0
Biological Process	GO:0007020	microtubule nucleation	5e-05	2.489	3.916	3.405	-3.0004	0.843	0.48	7020	0
Biological Process	GO:0009555	pollen development	5e-05	-1.558	3.733	3.371	-3.0004	0.819	0.525	9555	0
Biological Process	GO:0010389	regulation of G2/M transition of mitotic cell cycle	5e-05	null	null	3.359	-3.0004	0.852	0.777	6977	1
Biological Process	GO:0009627	systemic acquired resistance	5e-05	null	null	3.415	-3.0004	0.754	0.707	51707	1
Biological Process	GO:0030968	endoplasmic reticulum unfolded protein response	5e-05	-7.24	0.405	3.363	-3.0004	0.694	0.586	30968	0
Biological Process	GO:0009753	response to jasmonic acid	5e-05	null	null	3.383	-3.0004	0.767	0.793	10200	1
Biological Process	GO:0009751	response to salicylic acid	5e-05	null	null	3.367	-3.0004	0.769	0.792	10200	1
Cellular Component	GO:0009505	plant-type cell wall	6e-05	0.866	-6.969	3.133	-3.0004	0.927	0.161	9505	0
Cellular Component	GO:0000148	1,3-beta-D-glucan synthase complex	6e-05	null	null	3.163	-3.0004	0.735	0.701	46930	1
Biological Process	GO:0007565	female pregnancy	6e-05	null	null	3.454	-2.6994	0.811	0.885	10183	1
Biological Process	GO:0009698	phenylpropanoid metabolic process	6e-05	1.741	-2.51	3.48	-3.0004	0.896	0.073	9698	0
Biological Process	GO:0006984	ER-nucleus signaling pathway	6e-05	-6.633	0.365	3.461	-3.0004	0.764	0.216	6984	0
Biological Process	GO:0009826	unidimensional cell growth	6e-05	null	null	3.466	-3.0004	0.765	0.796	10075	1
Biological Process	GO:0009814	defense response, incompatible interaction	6e-05	null	null	3.507	-3.0004	0.755	0.717	51707	1
Biological Process	GO:0001656	metanephros development	6e-05	-1.41	2.727	3.48	-2.6994	0.818	0.601	1656	0
Biological Process	GO:0051567	histone H3-K9 methylation	6e-05	null	null	3.448	-3.0004	0.786	1.147	16568	1
Cellular Component	GO:0005788	endoplasmic reticulum lumen	7e-05	7.209	-0.019	3.232	-3.0004	0.608	0.643	5788	0
Cellular Component	GO:0009706	chloroplast inner membrane	7e-05	null	null	3.234	-2.5233	0.56	0.959	9570	1
Biological Process	GO:0009765	photosynthesis, light harvesting	7e-05	1.358	-1.768	3.523	-3.0004	0.954	0.473	9765	0
Biological Process	GO:0009737	response to abscisic acid	7e-05	null	null	3.558	-3.0004	0.76	0.81	10200	1
Biological Process	GO:0009414	response to water deprivation	7e-05	null	null	3.547	-3.0004	0.727	0.752	10200	1
Cellular Component	GO:0009528	plastid inner membrane	8e-05	null	null	3.255	-2.5233	0.559	0.961	9570	1
Biological Process	GO:0009658	chloroplast organization	8e-05	2.912	4.07	3.605	-3.0004	0.88	0.014	9658	0
Biological Process	GO:0010027	thylakoid membrane organization	8e-05	null	null	3.579	-3.0004	0.844	0.943	9658	1
Biological Process	GO:0050832	defense response to fungus	8e-05	null	null	3.618	-3.0004	0.756	0.729	51707	1
Biological Process	GO:0048366	leaf development	8e-05	null	null	3.591	-2.5233	0.802	0.89	10228	1
Biological Process	GO:0009793	embryo development ending in seed dormancy	8e-05	null	null	3.6	-3.0004	0.789	0.925	10228	1
Biological Process	GO:0009909	regulation of flower development	8e-05	null	null	3.58	-2.3015	0.731	0.875	10228	1
Cellular Component	GO:0016605	PML body	9e-05	7.161	-1.219	3.316	-2.3984	0.638	0.594	16605	0
Biological Process	GO:0048544	recognition of pollen	9e-05	null	null	3.652	-3.0004	0.721	0.808	10183	1
Biological Process	GO:0006891	intra-Golgi vesicle-mediated transport	9e-05	null	null	3.66	-3.0004	0.878	0.865	6888	1
Biological Process	GO:2001235	positive regulation of apoptotic signaling pathway	9e-05	null	null	3.635	-3.0004	0.705	0.947	12501	1
Biological Process	GO:0006342	chromatin silencing	9e-05	-2.203	-5.416	3.651	-3.0004	0.796	0.22	6342	0
Biological Process	GO:0009664	plant-type cell wall organization	9e-05	2.876	3.952	3.651	-2.3984	0.893	0.397	9664	0
Biological Process	GO:0034329	cell junction assembly	9e-05	3.252	4.274	3.652	-2.6994	0.849	0.479	34329	0
Biological Process	GO:0070574	cadmium ion transmembrane transport	9e-05	null	null	3.66	-3.0004	0.851	0.737	6816	1
Biological Process	GO:0015691	cadmium ion transport	9e-05	null	null	3.662	-3.0004	0.876	0.738	6816	1
Biological Process	GO:0002224	toll-like receptor signaling pathway	9e-05	null	null	3.656	-3.0004	0.691	0.761	31348	1
Biological Process	GO:0009651	response to salt stress	9e-05	-8.109	-1.359	3.664	-3.0004	0.798	0.573	9651	0
Biological Process	GO:0010228	vegetative to reproductive phase transition of meristem	9e-05	-1.75	3.872	3.674	-3.0004	0.789	0.642	10228	0
Biological Process	GO:0009639	response to red or far red light	9e-05	null	null	3.651	-3.0004	0.813	0.772	9644	1
Biological Process	GO:0009733	response to auxin	0.0001	null	null	3.707	-3.0004	0.776	0.749	9723	1
Biological Process	GO:0045216	cell-cell junction organization	0.0001	null	null	3.685	-2.6994	0.854	0.979	34329	1
Biological Process	GO:0010212	response to ionizing radiation	0.0001	null	null	3.709	-2.3984	0.812	0.766	9644	1
Biological Process	GO:0034976	response to endoplasmic reticulum stress	0.00011	-8.421	-1.29	3.742	-3.0004	0.806	0.36	34976	0
Biological Process	GO:0035235	ionotropic glutamate receptor signaling pathway	0.00011	-6.934	0.713	3.751	-3.0004	0.756	0.361	35235	0
Biological Process	GO:0009620	response to fungus	0.00011	null	null	3.755	-2.3015	0.788	0.745	51707	1
Biological Process	GO:0000281	mitotic cytokinesis	0.00011	-2.668	1.099	3.742	-2.6994	0.897	0.692	281	0
Molecular Function	GO:0008066	glutamate receptor activity	0.00012	6.508	1.447	3.765	-3.0004	0.941	0	8066	0
Biological Process	GO:0016036	cellular response to phosphate starvation	0.00012	-8.435	-0.859	3.792	-3.0004	0.747	0.405	16036	0
Biological Process	GO:0007623	circadian rhythm	0.00012	null	null	3.779	-2.3015	0.986	0.82	42753	1
Biological Process	GO:0009637	response to blue light	0.00012	null	null	3.764	-3.0004	0.811	0.739	9644	1
Cellular Component	GO:0022627	cytosolic small ribosomal subunit	0.00013	5.594	2.613	3.477	-2.6994	0.631	0.322	22627	0
Cellular Component	GO:0030663	COPI-coated vesicle membrane	0.00014	null	null	3.527	-3.0004	0.543	0.995	46930	1
Cellular Component	GO:0030126	COPI vesicle coat	0.00014	null	null	3.525	-3.0004	0.444	0.873	46930	1
Cellular Component	GO:0031969	chloroplast membrane	0.00014	null	null	3.527	-3.0004	0.546	0.939	9570	1
Biological Process	GO:0007411	axon guidance	0.00014	-6.217	2	3.838	-2.6994	0.575	0.685	7411	0
Biological Process	GO:0006972	hyperosmotic response	0.00016	null	null	3.904	-2.2223	0.793	0.917	9651	1
Molecular Function	GO:0005516	calmodulin binding	0.00017	5.429	-2.826	3.914	-3.0004	0.919	0.042	5516	0
Molecular Function	GO:0005262	calcium channel activity	0.00018	null	null	3.921	-3.0004	0.892	0.719	15288	1
Biological Process	GO:0001676	long-chain fatty acid metabolic process	0.00018	5.086	-0.591	3.952	-2.6994	0.872	0.55	1676	0
Biological Process	GO:0002237	response to molecule of bacterial origin	0.00018	null	null	3.952	-3.0004	0.723	0.883	51707	1
Biological Process	GO:0006888	ER to Golgi vesicle-mediated transport	0.00019	1.782	7.358	3.984	-3.0004	0.872	0.03	6888	0
Biological Process	GO:0007126	meiotic nuclear division	0.00019	null	null	3.968	-3.0004	0.806	0.823	30476	1
Biological Process	GO:0015802	basic amino acid transport	0.0002	1.493	7.216	4.006	-3.0004	0.876	0.453	15802	0
Biological Process	GO:0043065	positive regulation of apoptotic process	0.00021	null	null	4.023	-3.0004	0.809	0.817	12501	1
Biological Process	GO:0008544	epidermis development	0.00021	-1.53	3.828	4.015	-2.6994	0.868	0.7	8544	0
Cellular Component	GO:0009506	plasmodesma	0.00022	-3.262	6.245	3.707	-3.0004	0.973	0	9506	0
Cellular Component	GO:0045277	respiratory chain complex IV	0.00022	null	null	3.704	-3.0004	0.728	0.76	46930	1
Biological Process	GO:0007283	spermatogenesis	0.00022	null	null	4.03	-2.5233	0.764	0.818	10183	1
Biological Process	GO:0046777	protein autophosphorylation	0.00022	1.471	-5.746	4.038	-3.0004	0.895	0.444	46777	0
Cellular Component	GO:0048046	apoplast	0.00023	-5.406	1.511	3.735	-3.0004	0.962	0	48046	0
Biological Process	GO:0034968	histone lysine methylation	0.00023	null	null	4.051	-3.0004	0.769	0.883	16568	1
Biological Process	GO:0075713	establishment of integrated proviral latency	0.00025	-3.877	-0.955	4.093	-3.0004	0.902	0.329	75713	0
Biological Process	GO:0016458	gene silencing	0.00025	-3.079	-3.446	4.09	-3.0004	0.824	0.611	16458	0
Biological Process	GO:0015706	nitrate transport	0.00026	1.408	6.925	4.113	-3.0004	0.88	0.431	15706	0
Cellular Component	GO:0005778	peroxisomal membrane	0.00027	7.572	0.916	3.81	-2.2223	0.574	0.691	5778	0
Cellular Component	GO:0045211	postsynaptic membrane	0.00032	-1.144	-6.096	3.872	-3.0004	0.881	0.02	45211	0
Molecular Function	GO:0005179	hormone activity	0.00032	5.566	-3.478	4.174	-3.0004	0.918	0.431	5179	0
Molecular Function	GO:0030247	polysaccharide binding	0.00035	-2.727	-0.145	4.214	-3.0004	0.946	0.045	30247	0
Biological Process	GO:0000398	mRNA splicing, via spliceosome	0.00036	null	null	4.259	-2.5233	0.902	0.782	6397	1
Biological Process	GO:0070588	calcium ion transmembrane transport	0.00036	null	null	4.252	-3.0004	0.839	0.802	6816	1
Cellular Component	GO:0009941	chloroplast envelope	0.00037	null	null	3.942	-3.0004	0.548	0.756	9570	1
Biological Process	GO:0016117	carotenoid biosynthetic process	0.0004	null	null	4.3	-3.0004	0.844	0.81	6631	1
Biological Process	GO:0008202	steroid metabolic process	0.0004	5.03	-1.839	4.304	-3.0004	0.885	0.536	8202	0
Biological Process	GO:0000122	negative regulation of transcription from RNA polymerase II promoter	0.0004	null	null	4.302	-2.6994	0.811	0.819	31348	1
Cellular Component	GO:0005741	mitochondrial outer membrane	0.00043	7.307	0.928	4.008	-3.0004	0.559	0.347	5741	0
Molecular Function	GO:0004713	protein tyrosine kinase activity	0.00043	-7.438	1.555	4.308	-3.0004	0.822	0.525	4713	0
Molecular Function	GO:0000175	3'-5'-exoribonuclease activity	0.00044	2.766	6.527	4.318	-2.2223	0.796	0.681	175	0
Biological Process	GO:0008284	positive regulation of cell proliferation	0.00044	null	null	4.336	-3.0004	0.846	0.751	48522	1
Cellular Component	GO:0000790	nuclear chromatin	0.00045	null	null	4.024	-3.0004	0.553	0.788	795	1
Biological Process	GO:0043066	negative regulation of apoptotic process	0.00047	null	null	4.365	-3.0004	0.812	0.864	12501	1
Biological Process	GO:0045727	positive regulation of translation	0.00047	null	null	4.371	-2.5233	0.797	0.892	48522	1
Biological Process	GO:0007067	mitotic nuclear division	0.00047	null	null	4.367	-3.0004	0.808	0.904	30476	1
Biological Process	GO:0015696	ammonium transport	0.00048	1.262	7.119	4.374	-2.3984	0.87	0.602	15696	0
Cellular Component	GO:0005764	lysosome	0.00049	null	null	4.063	-3.0004	0.639	0.91	5775	1
Cellular Component	GO:0009570	chloroplast stroma	0.00049	7.154	1.375	4.061	-3.0004	0.561	0.687	9570	0
Biological Process	GO:0043069	negative regulation of programmed cell death	0.00049	null	null	4.391	-3.0004	0.812	0.99	12501	1
Biological Process	GO:0006816	calcium ion transport	0.00049	2.019	7.503	4.384	-3.0004	0.864	0.532	6816	0
Biological Process	GO:0018108	peptidyl-tyrosine phosphorylation	0.0005	2.124	-6.22	4.399	-2.6994	0.886	0.545	18108	0
Cellular Component	GO:0005681	spliceosomal complex	0.00053	5.689	1.75	4.096	-3.0004	0.578	0	5681	0
Biological Process	GO:0006635	fatty acid beta-oxidation	0.00053	5.33	-1.587	4.418	-3.0004	0.855	0.599	6635	0
Biological Process	GO:0000165	MAPK cascade	0.00054	-4.905	-3.362	4.425	-2.5233	0.676	0.577	165	0
Biological Process	GO:0042542	response to hydrogen peroxide	0.00057	null	null	4.451	-3.0004	0.751	0.845	10200	1
Cellular Component	GO:0005753	mitochondrial proton-transporting ATP synthase complex	0.00058	null	null	4.134	-3.0004	0.478	0.814	46930	1
Cellular Component	GO:0005774	vacuolar membrane	0.00062	null	null	4.163	-3.0004	0.529	0.775	5775	1
Cellular Component	GO:0005813	centrosome	0.00062	null	null	4.161	-2.6994	0.625	0.766	5815	1
Biological Process	GO:0019076	viral release from host cell	0.00062	-2.996	-0.451	4.489	-3.0004	0.897	0.507	19076	0
Biological Process	GO:0044070	regulation of anion transport	0.00063	null	null	4.497	-2.6994	0.809	0.885	43269	1
Cellular Component	GO:0000151	ubiquitin ligase complex	0.00066	2.594	7.524	4.193	-3.0004	0.79	0.338	151	0
Molecular Function	GO:0043531	ADP binding	0.00067	3.151	-2.17	4.504	-3.0004	0.914	0.047	43531	0
Cellular Component	GO:0000793	condensed chromosome	0.00069	5.733	-2.356	4.212	-3.0004	0.716	0.227	793	0
Biological Process	GO:0051302	regulation of cell division	0.00069	-4.526	2.369	4.537	-3.0004	0.857	0.076	51302	0
Biological Process	GO:0030036	actin cytoskeleton organization	0.00073	null	null	4.559	-3.0004	0.823	0.758	7020	1
Biological Process	GO:0042742	defense response to bacterium	0.00075	null	null	4.569	-3.0004	0.726	0.856	51707	1
Biological Process	GO:0030029	actin filament-based process	0.00077	0.368	-0.129	4.582	-2.6994	0.921	0.077	30029	0
Biological Process	GO:0075732	viral penetration into host nucleus	0.00077	null	null	4.581	-2.6994	0.82	0.726	19076	1
Biological Process	GO:0018298	protein-chromophore linkage	0.00085	2.347	-6.634	4.625	-3.0004	0.895	0.163	18298	0
Biological Process	GO:0016568	chromatin modification	0.00086	2.615	4.004	4.633	-3.0004	0.863	0.684	16568	0
Cellular Component	GO:0000139	Golgi membrane	0.0009	null	null	4.325	-3.0004	0.526	0.81	5788	1
Cellular Component	GO:0005815	microtubule organizing center	0.00091	7.256	-0.849	4.329	-3.0004	0.617	0.365	5815	0
Biological Process	GO:0009617	response to bacterium	0.00092	null	null	4.661	-3.0004	0.764	0.87	51707	1
Cellular Component	GO:0045202	synapse	0.00094	-4.456	3.964	4.343	-2.6994	0.973	0	45202	0
Biological Process	GO:0008380	RNA splicing	0.00097	0.233	-6.521	4.683	-3.0004	0.898	0.556	8380	0
Cellular Component	GO:0030117	membrane coat	0.00104	null	null	4.386	-3.0004	0.606	0.85	46930	1
Biological Process	GO:0016567	protein ubiquitination	0.00107	null	null	4.726	-3.0004	0.891	0.747	16926	1
Biological Process	GO:0006612	protein targeting to membrane	0.00109	null	null	4.733	-3.0004	0.76	0.733	15031	1
Biological Process	GO:0009611	response to wounding	0.00111	-8.108	-0.901	4.744	-3.0004	0.807	0.443	9611	0
Biological Process	GO:0006511	ubiquitin-dependent protein catabolic process	0.00111	1.959	-5.775	4.741	-2.6994	0.898	0.489	6511	0
Biological Process	GO:0009408	response to heat	0.00121	null	null	4.778	-3.0004	0.771	0.719	9651	1
Biological Process	GO:0090503	RNA phosphodiester bond hydrolysis, exonucleolytic	0.00126	1.434	-7.377	4.796	-3.0004	0.899	0.622	90503	0
Biological Process	GO:0043269	regulation of ion transport	0.0013	-1.505	6.575	4.811	-2.6994	0.804	0.496	43269	0
Cellular Component	GO:0016023	cytoplasmic membrane-bounded vesicle	0.00132	null	null	4.493	-2.5233	0.62	0.826	31410	1
Molecular Function	GO:0044822	poly(A) RNA binding	0.00135	1.068	-0.798	4.806	-3.0004	0.938	0.071	44822	0
Cellular Component	GO:0005789	endoplasmic reticulum membrane	0.00136	null	null	4.506	-3.0004	0.509	0.807	5788	1
Molecular Function	GO:0015288	porin activity	0.00136	-4.013	-6.1	4.808	-3.0004	0.891	0	15288	0
Biological Process	GO:0045087	innate immune response	0.00137	null	null	4.832	-3.0004	0.776	0.824	31348	1
Cellular Component	GO:0015629	actin cytoskeleton	0.00151	null	null	4.549	-3.0004	0.692	0.727	5815	1
Biological Process	GO:0007010	cytoskeleton organization	0.00151	2.449	3.956	4.876	-3.0004	0.863	0.582	7010	0
Cellular Component	GO:0009523	photosystem II	0.00157	null	null	4.566	-3.0004	0.66	0.877	46930	1
Cellular Component	GO:0046930	pore complex	0.00161	1.951	6.886	4.578	-3.0004	0.74	0.237	46930	0
Biological Process	GO:0006855	drug transmembrane transport	0.00162	-6.121	3.876	4.906	-3.0004	0.679	0.497	6855	0
Cellular Component	GO:0031410	cytoplasmic vesicle	0.00167	4.761	0.69	4.594	-3.0004	0.671	0.223	31410	0
Biological Process	GO:0030003	cellular cation homeostasis	0.0017	-3.764	2.587	4.927	-3.0004	0.847	0.637	30003	0
Molecular Function	GO:0004523	RNA-DNA hybrid ribonuclease activity	0.00176	2.161	6.64	4.921	-3.0004	0.779	0.575	4523	0
Biological Process	GO:0045893	positive regulation of transcription, DNA-templated	0.00193	null	null	4.983	-3.0004	0.768	0.846	48522	1
Biological Process	GO:0070838	divalent metal ion transport	0.00193	null	null	4.982	-2.6994	0.852	0.871	6816	1
Biological Process	GO:0015991	ATP hydrolysis coupled proton transport	0.00196	null	null	4.989	-3.0004	0.831	0.75	1902600	1
Biological Process	GO:0006897	endocytosis	0.002	null	null	4.998	-2.6994	0.921	0.752	6888	1
Biological Process	GO:0016485	protein processing	0.0021	0.9	-6.012	5.018	-2.6994	0.914	0.388	16485	0
Biological Process	GO:0006306	DNA methylation	0.00211	null	null	5.022	-3.0004	0.798	0.786	6342	1
Cellular Component	GO:0009535	chloroplast thylakoid membrane	0.00212	null	null	4.697	-3.0004	0.505	0.852	9570	1
Biological Process	GO:0000302	response to reactive oxygen species	0.00215	null	null	5.029	-3.0004	0.732	0.702	10200	1
Cellular Component	GO:0009534	chloroplast thylakoid	0.00218	null	null	4.71	-2.5233	0.511	0.995	9570	1
Molecular Function	GO:0008234	cysteine-type peptidase activity	0.00221	3.819	4.819	5.019	-3.0004	0.861	0.253	8234	0
Cellular Component	GO:0005615	extracellular space	0.00249	-5.608	0.479	4.767	-2.6994	0.962	0.41	5615	0
Biological Process	GO:0012501	programmed cell death	0.00273	0.754	1.683	5.133	-3.0004	0.876	0.061	12501	0
Biological Process	GO:0016114	terpenoid biosynthetic process	0.00275	null	null	5.136	-2.2223	0.83	0.948	6631	1
Biological Process	GO:0008219	cell death	0.00278	null	null	5.141	-3.0004	0.875	0.995	12501	1
Biological Process	GO:0031348	negative regulation of defense response	0.0028	-7.361	0.988	5.144	-3.0004	0.699	0.57	31348	0
Biological Process	GO:0030154	cell differentiation	0.00281	null	null	5.146	-3.0004	0.795	0.831	8360	1
Cellular Component	GO:0005783	endoplasmic reticulum	0.00299	6.302	0.473	4.846	-3.0004	0.595	0.331	5783	0
Biological Process	GO:0031347	regulation of defense response	0.00305	null	null	5.181	-3.0004	0.717	0.956	31348	1
Biological Process	GO:0007059	chromosome segregation	0.00373	0.789	0.984	5.269	-2.6994	0.912	0.094	7059	0
Biological Process	GO:0006397	mRNA processing	0.00373	0.547	-6.884	5.269	-3.0004	0.886	0.328	6397	0
Biological Process	GO:0016192	vesicle-mediated transport	0.00381	1.755	7.035	5.277	-3.0004	0.929	0.298	16192	0
Cellular Component	GO:0045263	proton-transporting ATP synthase complex, coupling factor F(o)	0.00411	null	null	4.985	-2.6994	0.677	0.948	46930	1
Molecular Function	GO:0051213	dioxygenase activity	0.00413	2.154	-6.254	5.291	-2.2223	0.9	0.317	51213	0
Biological Process	GO:0045892	negative regulation of transcription, DNA-templated	0.00422	null	null	5.322	-3.0004	0.772	0.764	31348	1
Biological Process	GO:0090502	RNA phosphodiester bond hydrolysis, endonucleolytic	0.00424	null	null	5.324	-3.0004	0.89	0.797	90503	1
Biological Process	GO:0048522	positive regulation of cellular process	0.00429	-5.036	2.788	5.329	-3.0004	0.848	0.27	48522	0
Biological Process	GO:0006261	DNA-dependent DNA replication	0.00438	1.655	-7.493	5.338	-3.0004	0.878	0.553	6261	0
Biological Process	GO:0051707	response to other organism	0.00439	-8.08	-0.282	5.34	-3.0004	0.741	0.585	51707	0
Cellular Component	GO:0019013	viral nucleocapsid	0.00446	-3.969	0.358	5.02	-3.0004	0.955	0.652	19013	0
Biological Process	GO:0015986	ATP synthesis coupled proton transport	0.0045	null	null	5.35	-3.0004	0.746	0.817	1902600	1
Biological Process	GO:0006278	RNA-dependent DNA replication	0.00453	null	null	5.353	-3.0004	0.878	0.708	6261	1
Biological Process	GO:0008299	isoprenoid biosynthetic process	0.00463	null	null	5.362	-3.0004	0.826	0.704	6631	1
Biological Process	GO:0006754	ATP biosynthetic process	0.00464	null	null	5.363	-3.0004	0.832	0.976	1902600	1
Biological Process	GO:0006928	movement of cell or subcellular component	0.00492	0.782	0.542	5.389	-2.6994	0.911	0.097	6928	0
Molecular Function	GO:0052689	carboxylic ester hydrolase activity	0.00511	2.367	6.374	5.383	-2.6994	0.786	0.643	52689	0
Biological Process	GO:0006886	intracellular protein transport	0.00521	null	null	5.413	-3.0004	0.889	0.855	15031	1
Biological Process	GO:0006979	response to oxidative stress	0.00539	-7.406	-1.003	5.428	-3.0004	0.787	0.668	6979	0
Molecular Function	GO:0004674	protein serine/threonine kinase activity	0.00565	-6.869	1.962	5.427	-3.0004	0.793	0.673	4674	0
Biological Process	GO:0006952	defense response	0.00569	-7.421	-0.938	5.452	-3.0004	0.787	0.672	6952	0
Molecular Function	GO:0015293	symporter activity	0.00576	-3.61	-6.124	5.435	-3.0004	0.9	0.389	15293	0
Molecular Function	GO:0003887	DNA-directed DNA polymerase activity	0.00591	-6.724	2.55	5.446	-3.0004	0.808	0.275	3887	0
Biological Process	GO:0032196	transposition	0.0061	1.438	0.877	5.482	-3.0004	0.909	0.091	32196	0
Biological Process	GO:0006633	fatty acid biosynthetic process	0.00629	null	null	5.496	-3.0004	0.82	0.75	6631	1
Cellular Component	GO:0012505	endomembrane system	0.00696	-2.638	-1.915	5.213	-3.0004	0.934	0.036	12505	0
Biological Process	GO:0008360	regulation of cell shape	0.00716	-2.197	3.85	5.552	-3.0004	0.657	0.612	8360	0
Cellular Component	GO:0030430	host cell cytoplasm	0.00734	-1.902	0.676	5.237	-3.0004	0.907	0	30430	0
Biological Process	GO:0006364	rRNA processing	0.00759	null	null	5.577	-3.0004	0.792	0.952	42254	1
Biological Process	GO:0090501	RNA phosphodiester bond hydrolysis	0.00762	1.678	-7.444	5.579	-3.0004	0.886	0.291	90501	0
Molecular Function	GO:0004497	monooxygenase activity	0.00779	1.67	-6.399	5.567	-3.0004	0.897	0.176	4497	0
Biological Process	GO:0015074	DNA integration	0.00781	1.019	-7.674	5.59	-3.0004	0.885	0.59	15074	0
Biological Process	GO:0046718	viral entry into host cell	0.00797	null	null	5.598	-3.0004	0.875	0.713	19076	1
Molecular Function	GO:0004540	ribonuclease activity	0.00801	null	null	5.578	-3.0004	0.762	0.785	4518	1
Cellular Component	GO:0005829	cytosol	0.00807	6.691	4.839	5.278	-2.3015	0.732	0.307	5829	0
Molecular Function	GO:0004527	exonuclease activity	0.00817	null	null	5.587	-3.0004	0.761	0.787	4518	1
Biological Process	GO:0006457	protein folding	0.00863	1.014	-6.511	5.633	-3.0004	0.892	0.456	6457	0
Biological Process	GO:0006631	fatty acid metabolic process	0.00867	5.434	-0.465	5.635	-3.0004	0.842	0.481	6631	0
Cellular Component	GO:0042025	host cell nucleus	0.00969	null	null	5.357	-3.0004	0.906	0.9	30430	1
Biological Process	GO:0006865	amino acid transport	0.00981	1.436	7.552	5.689	-2.5233	0.839	0.647	6865	0
Biological Process	GO:0061024	membrane organization	0.01009	3.134	4.319	5.701	-2.6994	0.866	0.632	61024	0
Cellular Component	GO:0020002	host cell plasma membrane	0.01029	null	null	5.383	-3.0004	0.905	0.781	30430	1
Biological Process	GO:0042254	ribosome biogenesis	0.01029	2.554	4.067	5.709	-3.0004	0.889	0.394	42254	0
Molecular Function	GO:0004129	cytochrome-c oxidase activity	0.0107	-0.962	-6.293	5.704	-3.0004	0.827	0.471	4129	0
Biological Process	GO:0022900	electron transport chain	0.01163	null	null	5.763	-3.0004	0.88	0.747	6119	1
Biological Process	GO:0006119	oxidative phosphorylation	0.01167	3.51	-4.559	5.764	-3.0004	0.832	0.202	6119	0
Biological Process	GO:0006468	protein phosphorylation	0.01206	1.411	-6.335	5.778	-3.0004	0.864	0.599	6468	0
Cellular Component	GO:0005887	integral component of plasma membrane	0.01253	-1.588	-5.507	5.469	-3.0004	0.853	0.543	5887	0
Cellular Component	GO:0033644	host cell membrane	0.01276	null	null	5.477	-3.0004	0.904	0.963	30430	1
Biological Process	GO:0009060	aerobic respiration	0.01366	null	null	5.832	-2.5233	0.879	0.76	6119	1
Cellular Component	GO:0019028	viral capsid	0.01438	-4.092	-0.129	5.529	-3.0004	0.956	0	19028	0
Cellular Component	GO:0009507	chloroplast	0.01445	6.485	1.242	5.531	-3.0004	0.546	0.566	9507	0
Molecular Function	GO:0004519	endonuclease activity	0.0151	null	null	5.854	-3.0004	0.75	0.732	4518	1
Biological Process	GO:0015031	protein transport	0.01595	0.98	7.75	5.9	-3.0004	0.899	0.228	15031	0
Molecular Function	GO:0016757	transferase activity, transferring glycosyl groups	0.01747	-7.31	-0.178	5.917	-3.0004	0.832	0.314	16757	0
Biological Process	GO:1902600	hydrogen ion transmembrane transport	0.01797	1.558	7.414	5.951	-3.0004	0.801	0.354	1902600	0
Biological Process	GO:0044262	cellular carbohydrate metabolic process	0.01835	1.633	-1.292	5.96	-2.2223	0.942	0.367	44262	0
Biological Process	GO:0006310	DNA recombination	0.0184	1.383	-7.536	5.962	-3.0004	0.877	0.653	6310	0
Molecular Function	GO:0004672	protein kinase activity	0.01875	-6.771	1.718	5.948	-3.0004	0.779	0.476	4672	0
Biological Process	GO:0006281	DNA repair	0.01953	-5.323	-3.895	5.988	-3.0004	0.626	0.658	6281	0
Cellular Component	GO:0042597	periplasmic space	0.01969	4.182	-7.285	5.665	-3.0004	0.93	0.028	42597	0
Biological Process	GO:0015992	proton transport	0.01974	null	null	5.992	-3.0004	0.834	0.969	1902600	1
Biological Process	GO:0006974	cellular response to DNA damage stimulus	0.01978	null	null	5.993	-3.0004	0.734	0.934	6281	1
Biological Process	GO:0006260	DNA replication	0.01998	1.765	-7.009	5.997	-3.0004	0.864	0.126	6260	0
Cellular Component	GO:0005743	mitochondrial inner membrane	0.02192	6.128	0.857	5.712	-3.0004	0.485	0.636	5743	0
Biological Process	GO:0006820	anion transport	0.02199	1.565	7.625	6.039	-3.0004	0.842	0.675	6820	0
Molecular Function	GO:0005506	iron ion binding	0.02467	-1.101	-3.485	6.067	-3.0004	0.91	0.133	5506	0
Molecular Function	GO:0005515	protein binding	0.02482	-2.221	7.564	6.07	-3.0004	0.939	0	5515	0
Biological Process	GO:0090305	nucleic acid phosphodiester bond hydrolysis	0.02508	1.07	-7.286	6.096	-3.0004	0.891	0.337	90305	0
Molecular Function	GO:0004518	nuclease activity	0.02633	2.62	6.16	6.095	-3.0004	0.758	0.343	4518	0
Biological Process	GO:0035556	intracellular signal transduction	0.02718	null	null	6.131	-3.0004	0.657	0.912	6281	1
Cellular Component	GO:0070469	respiratory chain	0.02726	-3.822	-3.531	5.806	-3.0004	0.909	0.108	70469	0
Cellular Component	GO:0031090	organelle membrane	0.02751	6.236	-0.682	5.81	-3.0004	0.558	0.689	31090	0
Biological Process	GO:0032259	methylation	0.02781	-1.475	-1.728	6.141	-3.0004	0.988	0.005	32259	0
Cellular Component	GO:0005634	nucleus	0.02809	5.946	-0.191	5.819	-3.0004	0.592	0.471	5634	0
Biological Process	GO:0006464	cellular protein modification process	0.02895	null	null	6.158	-2.5233	0.864	0.864	6468	1
Molecular Function	GO:0016779	nucleotidyltransferase activity	0.02934	-6.936	2.113	6.142	-3.0004	0.784	0.578	16779	0
Molecular Function	GO:0016853	isomerase activity	0.03154	-3.586	7.556	6.174	-2.3015	0.929	0.033	16853	0
Molecular Function	GO:0016746	transferase activity, transferring acyl groups	0.0324	-6.616	0.685	6.185	-3.0004	0.824	0	16746	0
Molecular Function	GO:0008233	peptidase activity	0.03609	2.959	5.44	6.232	-3.0004	0.83	0.034	8233	0
Biological Process	GO:0006508	proteolysis	0.03705	1.057	-6.371	6.266	-3.0004	0.909	0.354	6508	0
Biological Process	GO:0006200	(obsolete) ATP catabolic process	0.03745	-0.757	-0.995	6.27	-3.0004	0.993	0	6200	0
Biological Process	GO:0007165	signal transduction	0.03804	null	null	6.277	-3.0004	0.648	0.721	6281	1
Molecular Function	GO:0016874	ligase activity	0.03868	-1.93	6.068	6.262	-3.0004	0.929	0.034	16874	0
Biological Process	GO:0006812	cation transport	0.03981	null	null	6.297	-2.3984	0.834	0.821	6820	1
Biological Process	GO:0034220	ion transmembrane transport	0.03995	null	null	6.298	-3.0004	0.798	0.752	6820	1
Cellular Component	GO:0019012	virion	0.04083	-2.399	3.688	5.982	-3.0004	0.974	0	19012	0
Biological Process	GO:0006950	response to stress	0.04119	-7.486	-0.844	6.312	-3.0004	0.787	0.342	6950	0
Cellular Component	GO:0005576	extracellular region	0.04572	-1.528	7.371	6.031	-3.0004	0.974	0	5576	0
Molecular Function	GO:0016301	kinase activity	0.05084	-6.996	1.562	6.381	-3.0004	0.774	0.666	16301	0
Molecular Function	GO:0016887	ATPase activity	0.05234	null	null	6.394	-3.0004	0.81	0.86	17111	1
Biological Process	GO:0006811	ion transport	0.05991	1.604	7.596	6.474	-3.0004	0.852	0.699	6811	0
Cellular Component	GO:0030529	ribonucleoprotein complex	0.06088	3.15	6.681	6.155	-3.0004	0.754	0.358	30529	0
Biological Process	GO:0016310	phosphorylation	0.063	0.494	-4.889	6.496	-3.0004	0.929	0.413	16310	0
Biological Process	GO:0019439	aromatic compound catabolic process	0.06316	3.187	-5.156	6.497	-3.0004	0.911	0.222	19439	0
Molecular Function	GO:0017111	nucleoside-triphosphatase activity	0.07074	3.532	5.556	6.525	-3.0004	0.806	0.4	17111	0
Cellular Component	GO:0043234	protein complex	0.08273	3.147	7.459	6.288	-3.0004	0.842	0.625	43234	0
Molecular Function	GO:0022857	transmembrane transporter activity	0.08278	-3.051	-6.109	6.593	-3.0004	0.9	0.53	22857	0
Biological Process	GO:0006355	regulation of transcription, DNA-templated	0.08419	null	null	6.622	-3.0004	0.725	1.215	31348	1
Cellular Component	GO:0043231	intracellular membrane-bounded organelle	0.08847	null	null	6.318	-3.0004	0.557	0.728	5634	1
Biological Process	GO:0006351	transcription, DNA-templated	0.09014	null	null	6.652	-3.0004	0.806	1.978	31348	1
Molecular Function	GO:0016772	transferase activity, transferring phosphorus-containing groups	0.09188	-7.201	0.503	6.638	-3.0004	0.809	0.404	16772	0
Biological Process	GO:0055085	transmembrane transport	0.09397	2.147	6.964	6.67	-3.0004	0.806	0.567	55085	0
Molecular Function	GO:0005524	ATP binding	0.13885	null	null	6.817	-3.0004	0.884	0.711	166	1
Cellular Component	GO:0005886	plasma membrane	0.13934	-0.467	-6.074	6.515	-3.0004	0.865	0.287	5886	0
Molecular Function	GO:0016491	oxidoreductase activity	0.14657	-0.8	4.087	6.841	-3.0004	0.926	0.066	16491	0
Biological Process	GO:0055114	oxidation-reduction process	0.15044	2.18	-2.606	6.874	-3.0004	0.912	0.097	55114	0
Molecular Function	GO:0046872	metal ion binding	0.15488	1.097	-3.231	6.865	-3.0004	0.905	0.558	46872	0
Molecular Function	GO:0000166	nucleotide binding	0.20353	5.947	-1.023	6.983	-3.0004	0.903	0.285	166	0
Molecular Function	GO:0016740	transferase activity	0.22118	-1.345	0.175	7.02	-3.0004	0.926	0.047	16740	0
Cellular Component	GO:0016021	integral component of membrane	0.3523	-2.504	-4.059	6.918	-3.0004	0.897	0.272	16021	0
Cellular Component	GO:0005737	cytoplasm	0.38159	1.226	4.748	6.952	-3.0004	0.829	0.11	5737	0
Cellular Component	GO:0016020	membrane	0.5172	-2.703	5.283	7.085	-3.0004	0.987	0	16020	0
Biological Process	GO:0044237	cellular metabolic process	0.53874	-0.601	-1.085	7.428	-3.0004	0.952	0.028	44237	0
Cellular Component	GO:0005623	cell	0.64133	2.434	-6.248	7.178	-3.0004	0.99	0	5623	0

## Sheet: High temperature
Supplementary Table 5. Gene ontology categories for the differentially expressed transcripts under high temperature (AC-HT) relative to the treatment under ambient [CO2] and temperature (AC-AT). Gene ontology terms were also displayed on ReviGO attending to molecular functions, cellular components and biological processes.
Ontology	term_ID	description	frequency	plot_X	plot_Y	plot_size	log10 p-value	uniqueness	dispensability	representative	eliminated
Biological Process	GO:0032197	transposition, RNA-mediated	0	-1.001	-0.22	2.127	-3.0004	0.946	0.043	32197	0
Biological Process	GO:0051555	flavonol biosynthetic process	0	null	null	2.004	-2.6994	0.907	0.857	9813	1
Biological Process	GO:0009992	cellular water homeostasis	0	-1.686	1.803	1.996	-3.0004	0.866	0.159	9992	0
Biological Process	GO:0045339	farnesyl diphosphate catabolic process	0	4.048	3.688	0.778	-3.0004	0.901	0.199	45339	0
Biological Process	GO:1901943	(+)-epi-alpha-bisabolol biosynthetic process	0	4.367	0.553	0.301	-2.3984	0.905	0.347	1901943	0
Biological Process	GO:0010132	dhurrin biosynthetic process	0	4.708	-1.658	0.602	-2.5233	0.907	0.48	10132	0
Biological Process	GO:0052544	defense response by callose deposition in cell wall	0	null	null	2.041	-3.0004	0.685	0.922	52542	1
Biological Process	GO:0010018	far-red light signaling pathway	0	-6.341	0.201	1.756	-2.6994	0.742	0.501	10018	0
Biological Process	GO:0080167	response to karrikin	0	-6.594	0.843	2.093	-3.0004	0.817	0.518	80167	0
Biological Process	GO:0033617	mitochondrial respiratory chain complex IV assembly	0	null	null	2.35	-2.6994	0.908	0.87	32981	1
Biological Process	GO:0009870	defense response signaling pathway, resistance gene-dependent	0	-6.634	-0.409	2	-3.0004	0.739	0.533	9870	0
Biological Process	GO:0016099	monoterpenoid biosynthetic process	0	5.829	0.443	1.041	-2.3984	0.9	0.551	16099	0
Biological Process	GO:0002229	defense response to oomycetes	0	-7.01	-0.118	1.643	-2.6994	0.792	0.557	2229	0
Biological Process	GO:0009556	microsporogenesis	0	null	null	2.393	-3.0004	0.802	0.842	10584	1
Biological Process	GO:0010183	pollen tube guidance	0	null	null	2.1	-2.3015	0.681	0.808	10075	1
Biological Process	GO:0080092	regulation of pollen tube growth	0	null	null	2.072	-3.0004	0.695	0.762	10075	1
Biological Process	GO:0010120	camalexin biosynthetic process	0	6.122	0.743	1.681	-2.6994	0.888	0.62	10120	0
Biological Process	GO:0045338	farnesyl diphosphate metabolic process	0	2.272	3.822	2.161	-3.0004	0.897	0.63	45338	0
Biological Process	GO:0048657	anther wall tapetum cell differentiation	0	null	null	1.681	-3.0004	0.806	0.779	10228	1
Biological Process	GO:0042617	paclitaxel biosynthetic process	0	null	null	1.204	-2.6994	0.892	0.837	9686	1
Cellular Component	GO:0000943	retrotransposon nucleocapsid	0	-5.547	-4.948	1.973	-3.0004	0.722	0.235	943	0
Cellular Component	GO:0000326	protein storage vacuole	0	null	null	1.699	-3.0004	0.683	0.874	5774	1
Cellular Component	GO:0032586	protein storage vacuole membrane	0	-4.591	-3.813	0.477	-3.0004	0.653	0.623	32586	0
Molecular Function	GO:0052747	sinapyl alcohol dehydrogenase activity	0	-1.239	7.251	2.196	-3.0004	0.897	0	52747	0
Molecular Function	GO:0047938	glucose-6-phosphate 1-epimerase activity	0	-2.906	0.876	2.158	-2.5233	0.953	0.009	47938	0
Molecular Function	GO:0045486	naringenin 3-dioxygenase activity	0	-2.217	5.899	2.045	-3.0004	0.895	0.128	45486	0
Molecular Function	GO:0034008	R-linalool synthase activity	0	4.181	-5.413	0.845	-3.0004	0.867	0.242	34008	0
Molecular Function	GO:0046029	mannitol dehydrogenase activity	0	-1.147	6.994	2.021	-2.2223	0.899	0.302	46029	0
Molecular Function	GO:0045551	cinnamyl-alcohol dehydrogenase activity	0	0.767	6.836	2.196	-2.2223	0.897	0.307	45551	0
Molecular Function	GO:0033772	flavonoid 3',5'-hydroxylase activity	0	-0.074	5.798	1.792	-2.5233	0.901	0.364	33772	0
Molecular Function	GO:0045431	flavonol synthase activity	0	-2.44	6.095	1.875	-2.6994	0.896	0.524	45431	0
Molecular Function	GO:0050551	myrcene synthase activity	0	3.759	-5.633	1.079	-3.0004	0.849	0.535	50551	0
Molecular Function	GO:0034007	S-linalool synthase activity	0	3.484	-6.134	1.23	-2.6994	0.864	0.543	34007	0
Molecular Function	GO:0034009	isoprene synthase activity	0	3.969	-6.052	0.778	-2.5233	0.852	0.584	34009	0
Molecular Function	GO:0047461	(+)-delta-cadinene synthase activity	0	3.725	-6.002	1.114	-3.0004	0.849	0.681	47461	0
Biological Process	GO:0042753	positive regulation of circadian rhythm	1e-05	null	null	2.59	-3.0004	0.908	0.82	7623	1
Biological Process	GO:0042754	negative regulation of circadian rhythm	1e-05	null	null	2.543	-2.6994	0.915	0.838	7623	1
Biological Process	GO:0009718	anthocyanin-containing compound biosynthetic process	1e-05	null	null	2.735	-3.0004	0.908	0.925	9813	1
Biological Process	GO:0009963	positive regulation of flavonoid biosynthetic process	1e-05	null	null	2.679	-3.0004	0.875	0.919	9813	1
Biological Process	GO:0009805	coumarin biosynthetic process	1e-05	null	null	2.582	-3.0004	0.885	0.879	9699	1
Biological Process	GO:0009809	lignin biosynthetic process	1e-05	null	null	2.55	-3.0004	0.885	0.876	9699	1
Biological Process	GO:0010106	cellular response to iron ion starvation	1e-05	-8.418	0.171	2.78	-3.0004	0.763	0.297	10106	0
Biological Process	GO:0002679	respiratory burst involved in defense response	1e-05	-7.451	-0.199	2.866	-3.0004	0.78	0.3	2679	0
Biological Process	GO:0009688	abscisic acid biosynthetic process	1e-05	null	null	2.691	-2.3015	0.864	0.746	1901943	1
Biological Process	GO:0009684	indoleacetic acid biosynthetic process	1e-05	-0.928	2.438	2.862	-3.0004	0.841	0.439	9684	0
Biological Process	GO:0052542	defense response by callose deposition	1e-05	-5.96	-3.96	2.615	-3.0004	0.762	0.486	52542	0
Biological Process	GO:0002238	response to molecule of fungal origin	1e-05	null	null	2.635	-3.0004	0.752	0.862	51707	1
Biological Process	GO:0009816	defense response to bacterium, incompatible interaction	1e-05	null	null	2.403	-3.0004	0.762	0.875	51707	1
Biological Process	GO:0009817	defense response to fungus, incompatible interaction	1e-05	null	null	2.524	-2.6994	0.757	0.886	51707	1
Biological Process	GO:0032981	mitochondrial respiratory chain complex I assembly	1e-05	2.816	-0.315	2.816	-2.6994	0.904	0.532	32981	0
Biological Process	GO:0010583	response to cyclopentenone	1e-05	-7.85	1.214	2.843	-3.0004	0.8	0.553	10583	0
Biological Process	GO:0048262	determination of dorsal/ventral asymmetry	1e-05	1.171	-3.209	2.655	-3.0004	0.845	0.57	48262	0
Biological Process	GO:0010584	pollen exine formation	1e-05	3.997	-2.114	2.728	-3.0004	0.779	0.575	10584	0
Biological Process	GO:0042214	terpene metabolic process	1e-05	2.92	-0.841	2.669	-2.6994	0.901	0.612	42214	0
Biological Process	GO:0051510	regulation of unidimensional cell growth	1e-05	null	null	2.829	-3.0004	0.753	0.907	10075	1
Biological Process	GO:0009846	pollen germination	1e-05	null	null	2.571	-3.0004	0.803	0.85	10075	1
Biological Process	GO:0009834	plant-type secondary cell wall biogenesis	1e-05	null	null	2.639	-2.5233	0.916	0.872	9664	1
Biological Process	GO:0009825	multidimensional cell growth	1e-05	-1.43	-1.431	2.796	-3.0004	0.906	0.653	9825	0
Biological Process	GO:0048653	anther development	1e-05	null	null	2.849	-3.0004	0.802	0.969	10228	1
Biological Process	GO:0009686	gibberellin biosynthetic process	1e-05	5.515	1.438	2.591	-3.0004	0.875	0.665	9686	0
Biological Process	GO:0010043	response to zinc ion	1e-05	-7.674	1.411	2.817	-2.5233	0.82	0.687	10043	0
Cellular Component	GO:0000164	protein phosphatase type 1 complex	1e-05	-5.489	3.42	2.435	-3.0004	0.761	0.265	164	0
Molecular Function	GO:0018456	aryl-alcohol dehydrogenase (NAD+) activity	1e-05	1.625	7.009	2.447	-2.2223	0.896	0.314	18456	0
Molecular Function	GO:0010334	sesquiterpene synthase activity	1e-05	4.012	-5.884	2.605	-3.0004	0.835	0.679	10334	0
Biological Process	GO:0042538	hyperosmotic salinity response	2e-05	null	null	2.966	-3.0004	0.78	0.819	9651	1
Biological Process	GO:0010218	response to far red light	2e-05	null	null	3.01	-3.0004	0.783	0.781	9651	1
Biological Process	GO:0009585	red, far-red light phototransduction	2e-05	null	null	3.053	-3.0004	0.685	0.906	9651	1
Biological Process	GO:0010114	response to red light	2e-05	null	null	2.987	-3.0004	0.784	0.861	9651	1
Biological Process	GO:0010017	red or far-red light signaling pathway	2e-05	null	null	3.094	-3.0004	0.706	0.995	9651	1
Biological Process	GO:0043090	amino acid import	2e-05	2.004	-7.087	2.978	-3.0004	0.888	0.314	43090	0
Biological Process	GO:0016132	brassinosteroid biosynthetic process	2e-05	null	null	2.947	-2.3984	0.838	0.852	9684	1
Biological Process	GO:0016926	protein desumoylation	2e-05	-0.926	6.085	2.979	-3.0004	0.915	0.477	16926	0
Biological Process	GO:0034551	mitochondrial respiratory chain complex III assembly	2e-05	null	null	2.948	-2.6994	0.903	0.925	32981	1
Biological Process	GO:0009860	pollen tube growth	2e-05	null	null	3.084	-3.0004	0.701	0.932	10075	1
Biological Process	GO:0048527	lateral root development	2e-05	null	null	2.885	-3.0004	0.813	0.919	48364	1
Biological Process	GO:0048767	root hair elongation	2e-05	null	null	3.01	-3.0004	0.782	0.932	48364	1
Biological Process	GO:0016045	detection of bacterium	2e-05	-7.362	0.17	2.944	-3.0004	0.788	0.66	16045	0
Biological Process	GO:0010167	response to nitrate	2e-05	null	null	2.92	-3.0004	0.793	0.732	10200	1
Cellular Component	GO:0009524	phragmoplast	2e-05	-7.088	2.743	2.745	-3.0004	0.798	0.057	9524	0
Cellular Component	GO:0009705	plant-type vacuole membrane	2e-05	null	null	2.674	-3.0004	0.575	0.81	5774	1
Molecular Function	GO:0030507	spectrin binding	2e-05	6.781	-0.838	2.869	-2.6994	0.913	0.365	30507	0
Molecular Function	GO:0045309	protein phosphorylated amino acid binding	2e-05	6.726	-0.432	2.979	-2.3984	0.912	0.37	45309	0
Molecular Function	GO:0005080	protein kinase C binding	2e-05	7.179	-0.931	2.989	-2.5233	0.912	0.371	5080	0
Molecular Function	GO:0004965	G-protein coupled GABA receptor activity	2e-05	-0.337	-5.424	3.001	-2.3015	0.95	0.564	4965	0
Biological Process	GO:0009697	salicylic acid biosynthetic process	3e-05	4.947	1.555	3.108	-3.0004	0.881	0	9697	0
Biological Process	GO:0009873	ethylene-activated signaling pathway	3e-05	null	null	3.181	-2.6994	0.714	0.705	9723	1
Biological Process	GO:0009699	phenylpropanoid biosynthetic process	3e-05	4.882	1.125	3.214	-3.0004	0.878	0.175	9699	0
Biological Process	GO:0006075	(1-&gt;3)-beta-D-glucan biosynthetic process	3e-05	2.353	3.443	3.168	-3.0004	0.891	0.184	6075	0
Biological Process	GO:0010224	response to UV-B	3e-05	null	null	3.114	-3.0004	0.788	0.792	9651	1
Biological Process	GO:0009954	proximal/distal pattern formation	3e-05	null	null	3.107	-2.6994	0.837	0.728	48262	1
Biological Process	GO:0009630	gravitropism	3e-05	-8.121	0.736	3.098	-3.0004	0.774	0.579	9630	0
Biological Process	GO:0009407	toxin catabolic process	3e-05	1.703	2.453	3.095	-3.0004	0.899	0.605	9407	0
Biological Process	GO:0010075	regulation of meristem growth	3e-05	-3.051	-2.341	3.166	-3.0004	0.766	0.612	10075	0
Biological Process	GO:0048868	pollen tube development	3e-05	null	null	3.194	-2.6994	0.79	0.912	10075	1
Biological Process	GO:0009932	cell tip growth	3e-05	null	null	3.231	-3.0004	0.782	0.86	10075	1
Biological Process	GO:0019761	glucosinolate biosynthetic process	3e-05	6.285	0.964	3.204	-2.5233	0.881	0.626	19761	0
Biological Process	GO:0000380	alternative mRNA splicing, via spliceosome	3e-05	0.709	5.94	3.109	-2.6994	0.926	0.654	380	0
Biological Process	GO:0010103	stomatal complex morphogenesis	3e-05	null	null	3.205	-3.0004	0.808	0.986	48364	1
Biological Process	GO:0048443	stamen development	3e-05	null	null	3.143	-3.0004	0.797	0.906	10228	1
Biological Process	GO:0048481	ovule development	3e-05	null	null	3.21	-3.0004	0.797	0.777	10228	1
Biological Process	GO:0009862	systemic acquired resistance, salicylic acid mediated signaling pathway	3e-05	null	null	3.161	-3.0004	0.626	0.981	10200	1
Cellular Component	GO:0000325	plant-type vacuole	3e-05	null	null	2.838	-2.6994	0.662	0.766	5774	1
Biological Process	GO:0010363	regulation of plant-type hypersensitive response	4e-05	null	null	3.325	-3.0004	0.696	0.735	12501	1
Biological Process	GO:0009813	flavonoid biosynthetic process	4e-05	-0.941	0.459	3.311	-3.0004	0.944	0.114	9813	0
Biological Process	GO:0009644	response to high light intensity	4e-05	null	null	3.301	-3.0004	0.784	0.812	9651	1
Biological Process	GO:0046686	response to cadmium ion	4e-05	-7.326	0.947	3.301	-2.6994	0.81	0.406	46686	0
Biological Process	GO:0006623	protein targeting to vacuole	4e-05	0.745	-7.074	3.267	-3.0004	0.877	0.56	6623	0
Biological Process	GO:0009744	response to sucrose	4e-05	-7.768	1.088	3.252	-3.0004	0.792	0.579	9744	0
Biological Process	GO:0006890	retrograde vesicle-mediated transport, Golgi to ER	4e-05	null	null	3.318	-3.0004	0.882	0.828	6888	1
Biological Process	GO:0009832	plant-type cell wall biogenesis	4e-05	null	null	3.251	-2.3984	0.91	0.935	9664	1
Biological Process	GO:0010053	root epidermal cell differentiation	4e-05	null	null	3.329	-3.0004	0.794	0.967	48364	1
Biological Process	GO:0010200	response to chitin	4e-05	-8.42	0.845	3.243	-3.0004	0.784	0.672	10200	0
Biological Process	GO:0071230	cellular response to amino acid stimulus	4e-05	null	null	3.28	-2.5233	0.756	0.813	10200	1
Biological Process	GO:0009738	abscisic acid-activated signaling pathway	4e-05	null	null	3.263	-3.0004	0.7	0.868	10200	1
Biological Process	GO:0009867	jasmonic acid mediated signaling pathway	4e-05	null	null	3.259	-3.0004	0.7	0.782	10200	1
Biological Process	GO:0009863	salicylic acid mediated signaling pathway	4e-05	null	null	3.328	-3.0004	0.701	0.811	10200	1
Cellular Component	GO:0009543	chloroplast thylakoid lumen	4e-05	-5.758	-1.851	2.944	-3.0004	0.639	0.171	9543	0
Biological Process	GO:0009723	response to ethylene	5e-05	-7.683	1.004	3.385	-3.0004	0.783	0	9723	0
Biological Process	GO:0009626	plant-type hypersensitive response	5e-05	null	null	3.377	-3.0004	0.719	0.992	12501	1
Biological Process	GO:0009640	photomorphogenesis	5e-05	null	null	3.409	-3.0004	0.629	0.901	9651	1
Biological Process	GO:0009627	systemic acquired resistance	5e-05	null	null	3.415	-3.0004	0.739	0.707	51707	1
Biological Process	GO:0007020	microtubule nucleation	5e-05	2.436	-0.164	3.405	-3.0004	0.872	0.572	7020	0
Biological Process	GO:0009555	pollen development	5e-05	null	null	3.371	-2.6994	0.829	0.867	10584	1
Biological Process	GO:0030968	endoplasmic reticulum unfolded protein response	5e-05	-7.186	-0.031	3.363	-3.0004	0.696	0.586	30968	0
Biological Process	GO:0009753	response to jasmonic acid	5e-05	null	null	3.383	-3.0004	0.772	0.793	10200	1
Biological Process	GO:0009751	response to salicylic acid	5e-05	null	null	3.367	-3.0004	0.776	0.792	10200	1
Biological Process	GO:0006984	ER-nucleus signaling pathway	6e-05	-6.545	0.15	3.461	-3.0004	0.762	0.233	6984	0
Biological Process	GO:0009814	defense response, incompatible interaction	6e-05	null	null	3.507	-3.0004	0.742	0.717	51707	1
Biological Process	GO:0009826	unidimensional cell growth	6e-05	null	null	3.466	-3.0004	0.778	0.796	10075	1
Biological Process	GO:0001656	metanephros development	6e-05	0.967	-2.548	3.48	-3.0004	0.826	0.642	1656	0
Biological Process	GO:0010015	root morphogenesis	6e-05	null	null	3.461	-2.6994	0.816	0.982	48364	1
Cellular Component	GO:0000148	1,3-beta-D-glucan synthase complex	6e-05	null	null	3.163	-3.0004	0.774	0.701	46930	1
Cellular Component	GO:0046658	anchored component of plasma membrane	6e-05	2.155	-5.93	3.126	-3.0004	0.865	0.379	46658	0
Cellular Component	GO:0009505	plant-type cell wall	6e-05	1.612	-7.581	3.133	-3.0004	0.9	0.439	9505	0
Cellular Component	GO:0031902	late endosome membrane	6e-05	-7.028	-2.846	3.136	-3.0004	0.594	0.643	31902	0
Biological Process	GO:0009737	response to abscisic acid	7e-05	null	null	3.558	-3.0004	0.767	0.81	10200	1
Biological Process	GO:0009414	response to water deprivation	7e-05	null	null	3.547	-3.0004	0.712	0.752	10200	1
Cellular Component	GO:0005788	endoplasmic reticulum lumen	7e-05	null	null	3.232	-2.5233	0.614	0.807	5783	1
Biological Process	GO:0016579	protein deubiquitination	8e-05	null	null	3.606	-2.5233	0.91	0.89	16926	1
Biological Process	GO:0050832	defense response to fungus	8e-05	null	null	3.618	-3.0004	0.741	0.729	51707	1
Biological Process	GO:0048364	root development	8e-05	1.092	-3.13	3.609	-3.0004	0.814	0.654	48364	0
Biological Process	GO:0007338	single fertilization	8e-05	null	null	3.585	-3.0004	0.838	0.716	10228	1
Biological Process	GO:0048366	leaf development	8e-05	null	null	3.591	-2.5233	0.815	0.89	10228	1
Biological Process	GO:0009793	embryo development ending in seed dormancy	8e-05	null	null	3.6	-3.0004	0.798	0.814	10228	1
Biological Process	GO:0009909	regulation of flower development	8e-05	null	null	3.58	-2.6994	0.747	0.875	10228	1
Biological Process	GO:0009734	auxin-activated signaling pathway	8e-05	null	null	3.62	-3.0004	0.7	0.783	10200	1
Biological Process	GO:2001235	positive regulation of apoptotic signaling pathway	9e-05	null	null	3.635	-3.0004	0.708	0.769	12501	1
Biological Process	GO:0009651	response to salt stress	9e-05	-7.986	0.038	3.664	-3.0004	0.763	0.23	9651	0
Biological Process	GO:0009639	response to red or far red light	9e-05	null	null	3.651	-3.0004	0.775	0.852	9651	1
Biological Process	GO:0048544	recognition of pollen	9e-05	null	null	3.652	-3.0004	0.728	0.806	10075	1
Biological Process	GO:0006891	intra-Golgi vesicle-mediated transport	9e-05	null	null	3.66	-3.0004	0.878	0.865	6888	1
Biological Process	GO:0009664	plant-type cell wall organization	9e-05	3.223	-0.46	3.651	-2.6994	0.905	0.629	9664	0
Biological Process	GO:0010228	vegetative to reproductive phase transition of meristem	9e-05	1.877	-4.341	3.674	-3.0004	0.797	0.661	10228	0
Biological Process	GO:0009733	response to auxin	0.0001	null	null	3.707	-3.0004	0.775	0.749	9723	1
Biological Process	GO:0035235	ionotropic glutamate receptor signaling pathway	0.00011	-6.873	-0.437	3.751	-3.0004	0.754	0.334	35235	0
Biological Process	GO:0034976	response to endoplasmic reticulum stress	0.00011	-8.549	0.348	3.742	-3.0004	0.793	0.385	34976	0
Biological Process	GO:0009620	response to fungus	0.00011	null	null	3.755	-3.0004	0.773	0.745	51707	1
Biological Process	GO:0071901	negative regulation of protein serine/threonine kinase activity	0.00011	-2.067	6.567	3.733	-2.6994	0.843	0.543	71901	0
Biological Process	GO:0000077	DNA damage checkpoint	0.00011	-7.204	0.678	3.748	-2.6994	0.765	0.623	77	0
Molecular Function	GO:0010333	terpene synthase activity	0.00011	4.175	-5.713	3.703	-3.0004	0.841	0.522	10333	0
Biological Process	GO:0007623	circadian rhythm	0.00012	-2.229	-1.492	3.779	-3.0004	0.979	0	7623	0
Biological Process	GO:0009637	response to blue light	0.00012	null	null	3.764	-3.0004	0.773	0.866	9651	1
Biological Process	GO:0016036	cellular response to phosphate starvation	0.00012	null	null	3.792	-3.0004	0.735	0.737	10106	1
Molecular Function	GO:0008066	glutamate receptor activity	0.00012	-0.376	-4.495	3.765	-3.0004	0.95	0	8066	0
Biological Process	GO:0042939	tripeptide transport	0.00013	null	null	3.825	-3.0004	0.879	0.766	15833	1
Cellular Component	GO:0005758	mitochondrial intermembrane space	0.00013	-7.007	-2.375	3.473	-3.0004	0.641	0.299	5758	0
Cellular Component	GO:0030663	COPI-coated vesicle membrane	0.00014	null	null	3.527	-3.0004	0.553	0.995	46930	1
Cellular Component	GO:0030126	COPI vesicle coat	0.00014	null	null	3.525	-3.0004	0.493	0.873	46930	1
Biological Process	GO:0006972	hyperosmotic response	0.00016	null	null	3.904	-3.0004	0.756	0.917	9651	1
Molecular Function	GO:0005516	calmodulin binding	0.00017	6.426	-0.564	3.914	-3.0004	0.906	0.042	5516	0
Biological Process	GO:0002237	response to molecule of bacterial origin	0.00018	null	null	3.952	-3.0004	0.716	0.883	51707	1
Molecular Function	GO:0005262	calcium channel activity	0.00018	null	null	3.921	-2.6994	0.935	0.719	15288	1
Biological Process	GO:0006888	ER to Golgi vesicle-mediated transport	0.00019	1.765	-7.027	3.984	-3.0004	0.872	0.616	6888	0
Molecular Function	GO:0004016	adenylate cyclase activity	0.00019	2.652	-6.531	3.945	-3.0004	0.893	0.019	4016	0
Biological Process	GO:0015802	basic amino acid transport	0.0002	1.547	-7.077	4.006	-3.0004	0.873	0.473	15802	0
Biological Process	GO:0006334	nucleosome assembly	0.0002	4.218	-0.934	3.987	-3.0004	0.897	0.498	6334	0
Biological Process	GO:0043065	positive regulation of apoptotic process	0.00021	null	null	4.023	-2.6994	0.83	0.947	12501	1
Biological Process	GO:0008544	epidermis development	0.00021	1.64	-4.413	4.015	-3.0004	0.867	0.7	8544	0
Cellular Component	GO:0031225	anchored component of membrane	0.00021	5.607	-2.236	3.683	-3.0004	0.932	0.076	31225	0
Biological Process	GO:0046777	protein autophosphorylation	0.00022	-0.343	6.277	4.038	-3.0004	0.907	0.575	46777	0
Cellular Component	GO:0009506	plasmodesma	0.00022	3.086	4.815	3.707	-3.0004	0.969	0	9506	0
Cellular Component	GO:0048046	apoplast	0.00023	4.992	2.521	3.735	-3.0004	0.969	0	48046	0
Biological Process	GO:0009409	response to cold	0.00024	null	null	4.074	-3.0004	0.755	0.865	9651	1
Biological Process	GO:0075713	establishment of integrated proviral latency	0.00025	-5.072	-3.002	4.093	-2.3984	0.903	0.508	75713	0
Cellular Component	GO:0022626	cytosolic ribosome	0.00025	-5.894	1.079	3.771	-3.0004	0.699	0.235	22626	0
Biological Process	GO:0006970	response to osmotic stress	0.00026	null	null	4.107	-2.6994	0.754	0.749	9651	1
Biological Process	GO:0015706	nitrate transport	0.00026	1.486	-6.712	4.113	-3.0004	0.879	0.397	15706	0
Cellular Component	GO:0045211	postsynaptic membrane	0.00032	2.36	-6.318	3.872	-3.0004	0.858	0	45211	0
Molecular Function	GO:0005179	hormone activity	0.00032	7.077	-0.537	4.174	-2.6994	0.905	0.431	5179	0
Biological Process	GO:0051131	chaperone-mediated protein complex assembly	0.00033	2.297	0.027	4.21	-2.6994	0.899	0.635	51131	0
Molecular Function	GO:0030247	polysaccharide binding	0.00035	-4.127	-7.116	4.214	-3.0004	0.95	0.045	30247	0
Biological Process	GO:0070588	calcium ion transmembrane transport	0.00036	null	null	4.252	-3.0004	0.859	0.853	70838	1
Cellular Component	GO:0009941	chloroplast envelope	0.00037	null	null	3.942	-3.0004	0.588	0.756	9570	1
Biological Process	GO:0042938	dipeptide transport	0.00038	null	null	4.273	-3.0004	0.872	0.864	15833	1
Cellular Component	GO:0005741	mitochondrial outer membrane	0.00043	null	null	4.008	-3.0004	0.561	0.729	5774	1
Molecular Function	GO:0004713	protein tyrosine kinase activity	0.00043	-6.723	0.852	4.308	-3.0004	0.863	0.525	4713	0
Biological Process	GO:0008284	positive regulation of cell proliferation	0.00044	null	null	4.336	-3.0004	0.867	0.751	48522	1
Biological Process	GO:0006569	tryptophan catabolic process	0.00044	3.618	3.548	4.339	-3.0004	0.874	0.636	6569	0
Cellular Component	GO:0000790	nuclear chromatin	0.00045	null	null	4.024	-3.0004	0.582	0.867	786	1
Molecular Function	GO:0044212	transcription regulatory region DNA binding	0.00045	-4.721	-4.577	4.328	-2.5233	0.945	0.066	44212	0
Biological Process	GO:0007005	mitochondrion organization	0.00046	2.326	-0.122	4.363	-3.0004	0.902	0.571	7005	0
Biological Process	GO:0043066	negative regulation of apoptotic process	0.00047	null	null	4.365	-3.0004	0.831	0.864	12501	1
Biological Process	GO:0007067	mitotic nuclear division	0.00047	1.589	0.286	4.367	-3.0004	0.858	0.604	7067	0
Biological Process	GO:0015696	ammonium transport	0.00048	1.509	-6.866	4.374	-3.0004	0.873	0.516	15696	0
Biological Process	GO:0042744	hydrogen peroxide catabolic process	0.00049	0.297	2.713	4.39	-3.0004	0.91	0.074	42744	0
Biological Process	GO:0043069	negative regulation of programmed cell death	0.00049	null	null	4.391	-3.0004	0.831	0.99	12501	1
Biological Process	GO:0006816	calcium ion transport	0.00049	null	null	4.384	-3.0004	0.879	0.871	70838	1
Cellular Component	GO:0005764	lysosome	0.00049	null	null	4.063	-3.0004	0.614	0.91	5774	1
Cellular Component	GO:0009570	chloroplast stroma	0.00049	-6.935	-1.809	4.061	-3.0004	0.591	0.687	9570	0
Biological Process	GO:0018108	peptidyl-tyrosine phosphorylation	0.0005	-0.265	6.925	4.399	-3.0004	0.901	0.618	18108	0
Biological Process	GO:0006635	fatty acid beta-oxidation	0.00053	null	null	4.418	-2.6994	0.863	0.746	8652	1
Biological Process	GO:0000165	MAPK cascade	0.00054	-5.08	3.704	4.425	-3.0004	0.678	0.621	165	0
Biological Process	GO:0019076	viral release from host cell	0.00062	-3.567	0.395	4.489	-2.3984	0.898	0.544	19076	0
Cellular Component	GO:0005774	vacuolar membrane	0.00062	-6.371	-2.651	4.163	-3.0004	0.515	0.335	5774	0
Biological Process	GO:0044070	regulation of anion transport	0.00063	null	null	4.497	-3.0004	0.822	0.885	43269	1
Biological Process	GO:0042128	nitrate assimilation	0.00066	2.255	1.747	4.516	-2.6994	0.898	0.242	42128	0
Molecular Function	GO:0043531	ADP binding	0.00067	0.949	-1.528	4.504	-3.0004	0.923	0.047	43531	0
Biological Process	GO:0051302	regulation of cell division	0.00069	-4.664	-1.237	4.537	-3.0004	0.875	0.076	51302	0
Cellular Component	GO:0005929	cilium	0.00069	-5.363	-5.802	4.211	-3.0004	0.764	0.021	5929	0
Biological Process	GO:0006857	oligopeptide transport	0.0007	null	null	4.544	-3.0004	0.868	0.864	15833	1
Biological Process	GO:0042742	defense response to bacterium	0.00075	null	null	4.569	-3.0004	0.711	0.856	51707	1
Biological Process	GO:0009416	response to light stimulus	0.00083	null	null	4.616	-3.0004	0.749	0.702	9651	1
Biological Process	GO:0016568	chromatin modification	0.00086	null	null	4.633	-3.0004	0.895	0.874	6334	1
Cellular Component	GO:0000139	Golgi membrane	0.0009	null	null	4.325	-3.0004	0.528	0.81	5783	1
Biological Process	GO:0009617	response to bacterium	0.00092	null	null	4.661	-3.0004	0.747	0.87	51707	1
Biological Process	GO:0006869	lipid transport	0.00093	0.781	-7.601	4.666	-3.0004	0.873	0.693	6869	0
Cellular Component	GO:0045202	synapse	0.00094	2.355	-0.403	4.343	-3.0004	0.969	0	45202	0
Biological Process	GO:0008380	RNA splicing	0.00097	0.839	6.275	4.683	-2.3984	0.911	0.556	8380	0
Cellular Component	GO:0030117	membrane coat	0.00104	null	null	4.386	-3.0004	0.652	0.85	46930	1
Biological Process	GO:0016567	protein ubiquitination	0.00107	null	null	4.726	-3.0004	0.898	0.747	16926	1
Cellular Component	GO:0005773	vacuole	0.00108	-7.336	-1.252	4.402	-3.0004	0.659	0.35	5773	0
Biological Process	GO:0006612	protein targeting to membrane	0.00109	null	null	4.733	-3.0004	0.775	0.733	15031	1
Biological Process	GO:0009611	response to wounding	0.00111	-8.032	0.156	4.744	-3.0004	0.79	0.38	9611	0
Biological Process	GO:0006511	ubiquitin-dependent protein catabolic process	0.00111	1.318	6.004	4.741	-3.0004	0.9	0.65	6511	0
Molecular Function	GO:0003682	chromatin binding	0.00115	-1.692	-7.681	4.736	-2.2223	0.948	0.05	3682	0
Biological Process	GO:0009408	response to heat	0.00121	null	null	4.778	-3.0004	0.732	0.833	9651	1
Biological Process	GO:0043269	regulation of ion transport	0.0013	-0.829	-6.57	4.811	-3.0004	0.818	0.42	43269	0
Cellular Component	GO:0005789	endoplasmic reticulum membrane	0.00136	null	null	4.506	-3.0004	0.511	0.795	5783	1
Molecular Function	GO:0015288	porin activity	0.00136	-1.961	-0.073	4.808	-3.0004	0.933	0	15288	0
Biological Process	GO:0045087	innate immune response	0.00137	null	null	4.832	-3.0004	0.756	0.824	31348	1
Cellular Component	GO:0000786	nucleosome	0.00143	-5.063	-0.465	4.525	-3.0004	0.585	0.381	786	0
Biological Process	GO:0009266	response to temperature stimulus	0.00147	null	null	4.863	-3.0004	0.751	0.869	9651	1
Cellular Component	GO:0046930	pore complex	0.00161	-3.138	5.504	4.578	-3.0004	0.808	0.372	46930	0
Cellular Component	GO:0031410	cytoplasmic vesicle	0.00167	-6.816	-0.233	4.594	-3.0004	0.678	0.218	31410	0
Biological Process	GO:0006470	protein dephosphorylation	0.00176	0.262	6.63	4.942	-2.6994	0.897	0.696	6470	0
Molecular Function	GO:0004523	RNA-DNA hybrid ribonuclease activity	0.00176	5.812	3.72	4.921	-3.0004	0.851	0.575	4523	0
Biological Process	GO:0016042	lipid catabolic process	0.00181	5.263	3.158	4.955	-2.5233	0.889	0.552	16042	0
Biological Process	GO:0045893	positive regulation of transcription, DNA-templated	0.00193	null	null	4.983	-3.0004	0.802	0.846	48522	1
Biological Process	GO:0070838	divalent metal ion transport	0.00193	1.398	-7.439	4.982	-3.0004	0.868	0.68	70838	0
Biological Process	GO:0006897	endocytosis	0.002	null	null	4.998	-3.0004	0.919	0.752	6888	1
Cellular Component	GO:0000785	chromatin	0.00203	null	null	4.679	-2.6994	0.589	0.844	786	1
Cellular Component	GO:0009535	chloroplast thylakoid membrane	0.00212	null	null	4.697	-3.0004	0.547	0.852	9570	1
Cellular Component	GO:0009534	chloroplast thylakoid	0.00218	null	null	4.71	-2.5233	0.554	0.995	9570	1
Molecular Function	GO:0008234	cysteine-type peptidase activity	0.00221	3.647	3.635	5.019	-3.0004	0.873	0.596	8234	0
Biological Process	GO:0071805	potassium ion transmembrane transport	0.00256	1.733	-7.478	5.105	-3.0004	0.844	0.061	71805	0
Biological Process	GO:0012501	programmed cell death	0.00273	-1.588	-4.289	5.133	-3.0004	0.883	0.085	12501	0
Biological Process	GO:0016114	terpenoid biosynthetic process	0.00275	5.859	1.227	5.136	-3.0004	0.845	0.534	16114	0
Biological Process	GO:0008219	cell death	0.00278	null	null	5.141	-3.0004	0.883	0.995	12501	1
Biological Process	GO:0031348	negative regulation of defense response	0.0028	-7.663	-0.508	5.144	-3.0004	0.694	0.623	31348	0
Biological Process	GO:0030154	cell differentiation	0.00281	null	null	5.146	-3.0004	0.802	0.831	7275	1
Cellular Component	GO:0000502	proteasome complex	0.00283	-3.673	5.775	4.822	-3.0004	0.808	0.024	502	0
Cellular Component	GO:0005783	endoplasmic reticulum	0.00299	-6.486	-1.605	4.846	-3.0004	0.582	0.282	5783	0
Biological Process	GO:0031347	regulation of defense response	0.00305	null	null	5.181	-3.0004	0.706	0.956	31348	1
Biological Process	GO:0015833	peptide transport	0.00308	1.409	-7.111	5.186	-3.0004	0.855	0.565	15833	0
Biological Process	GO:0009636	response to toxic substance	0.00341	-8.167	0.524	5.229	-2.6994	0.765	0.521	9636	0
Biological Process	GO:0030163	protein catabolic process	0.00359	1.682	6.068	5.251	-3.0004	0.915	0.4	30163	0
Molecular Function	GO:0005509	calcium ion binding	0.00365	0.406	1.293	5.237	-2.6994	0.92	0.338	5509	0
Biological Process	GO:0006397	mRNA processing	0.00373	1.408	6.75	5.269	-3.0004	0.901	0.328	6397	0
Biological Process	GO:0006605	protein targeting	0.0038	null	null	5.277	-3.0004	0.839	0.918	15031	1
Biological Process	GO:0016192	vesicle-mediated transport	0.00381	1.312	-6.798	5.277	-3.0004	0.929	0.276	16192	0
Molecular Function	GO:0051213	dioxygenase activity	0.00413	1.129	7.198	5.291	-3.0004	0.888	0.317	51213	0
Biological Process	GO:0045892	negative regulation of transcription, DNA-templated	0.00422	null	null	5.322	-3.0004	0.8	0.764	31348	1
Biological Process	GO:0090502	RNA phosphodiester bond hydrolysis, endonucleolytic	0.00424	2.017	7.447	5.324	-3.0004	0.906	0.695	90502	0
Biological Process	GO:0048522	positive regulation of cellular process	0.00429	-5.003	-1.479	5.329	-3.0004	0.871	0.27	48522	0
Biological Process	GO:0006261	DNA-dependent DNA replication	0.00438	2.979	7.003	5.338	-3.0004	0.895	0.114	6261	0
Biological Process	GO:0051707	response to other organism	0.00439	-8.201	0.058	5.34	-3.0004	0.722	0.504	51707	0
Cellular Component	GO:0019013	viral nucleocapsid	0.00446	0.608	6.409	5.02	-2.3984	0.95	0.652	19013	0
Biological Process	GO:0006278	RNA-dependent DNA replication	0.00453	null	null	5.353	-3.0004	0.894	0.708	6261	1
Biological Process	GO:0007275	multicellular organismal development	0.0046	1.693	-3.884	5.36	-3.0004	0.801	0.036	7275	0
Biological Process	GO:0009607	response to biotic stimulus	0.00465	-8.014	0.467	5.364	-2.3984	0.799	0.517	9607	0
Molecular Function	GO:0004190	aspartic-type endopeptidase activity	0.00513	3.975	3.788	5.385	-3.0004	0.867	0.278	4190	0
Biological Process	GO:0006886	intracellular protein transport	0.00521	null	null	5.413	-3.0004	0.875	0.855	15031	1
Biological Process	GO:0006979	response to oxidative stress	0.00539	-7.464	0.487	5.428	-3.0004	0.769	0.668	6979	0
Biological Process	GO:0007155	cell adhesion	0.00564	-2.024	-0.76	5.448	-2.2223	0.992	0	7155	0
Molecular Function	GO:0004674	protein serine/threonine kinase activity	0.00565	-6.945	0.856	5.427	-3.0004	0.84	0.673	4674	0
Biological Process	GO:0006952	defense response	0.00569	-7.462	0.436	5.452	-3.0004	0.768	0.672	6952	0
Molecular Function	GO:0015293	symporter activity	0.00576	-2.637	2.633	5.435	-3.0004	0.945	0.389	15293	0
Molecular Function	GO:0003887	DNA-directed DNA polymerase activity	0.00591	-7.278	0.017	5.446	-3.0004	0.853	0.275	3887	0
Biological Process	GO:0000096	sulfur amino acid metabolic process	0.00604	2.947	2.672	5.478	-2.5233	0.881	0.611	96	0
Biological Process	GO:0032196	transposition	0.0061	-0.295	-1.102	5.482	-3.0004	0.92	0.107	32196	0
Biological Process	GO:0006633	fatty acid biosynthetic process	0.00629	null	null	5.496	-3.0004	0.834	0.701	8652	1
Cellular Component	GO:0012505	endomembrane system	0.00696	3.429	3.305	5.213	-3.0004	0.931	0.029	12505	0
Biological Process	GO:0008360	regulation of cell shape	0.00716	null	null	5.552	-3.0004	0.683	0.822	7275	1
Cellular Component	GO:0030430	host cell cytoplasm	0.00734	null	null	5.237	-2.3984	0.896	0.8	33644	1
Biological Process	GO:0046907	intracellular transport	0.00739	1.206	-7.173	5.566	-3.0004	0.899	0.266	46907	0
Biological Process	GO:0006364	rRNA processing	0.00759	3.18	5.723	5.577	-2.3984	0.827	0.685	6364	0
Biological Process	GO:0090501	RNA phosphodiester bond hydrolysis	0.00762	1.975	7.452	5.579	-3.0004	0.901	0.299	90501	0
Molecular Function	GO:0004497	monooxygenase activity	0.00779	0.515	7.228	5.567	-3.0004	0.884	0.188	4497	0
Biological Process	GO:0015074	DNA integration	0.00781	2.004	7.705	5.59	-3.0004	0.902	0.502	15074	0
Biological Process	GO:0042546	cell wall biogenesis	0.00797	4.913	-1.158	5.598	-3.0004	0.89	0.307	42546	0
Biological Process	GO:0046718	viral entry into host cell	0.00797	null	null	5.598	-2.3984	0.881	0.713	19076	1
Molecular Function	GO:0004540	ribonuclease activity	0.00801	null	null	5.578	-3.0004	0.835	0.785	4518	1
Cellular Component	GO:0005829	cytosol	0.00807	-7.488	1.276	5.278	-2.6994	0.723	0.324	5829	0
Molecular Function	GO:0030246	carbohydrate binding	0.00825	-4.275	-6.342	5.591	-3.0004	0.944	0.061	30246	0
Biological Process	GO:0006457	protein folding	0.00863	0.442	6.942	5.633	-3.0004	0.903	0.535	6457	0
Cellular Component	GO:0005618	cell wall	0.00933	0.827	-7.589	5.341	-3.0004	0.873	0.226	5618	0
Cellular Component	GO:0042025	host cell nucleus	0.00969	null	null	5.357	-2.3984	0.895	0.9	33644	1
Cellular Component	GO:0005694	chromosome	0.00973	-6.382	-4.254	5.359	-2.6994	0.688	0.424	5694	0
Biological Process	GO:0006865	amino acid transport	0.00981	null	null	5.689	-2.5233	0.836	0.73	15833	1
Cellular Component	GO:0020002	host cell plasma membrane	0.01029	null	null	5.383	-2.3984	0.894	0.963	33644	1
Biological Process	GO:0006468	protein phosphorylation	0.01206	null	null	5.778	-3.0004	0.881	0.864	6464	1
Cellular Component	GO:0005887	integral component of plasma membrane	0.01253	2.275	-5.928	5.469	-3.0004	0.82	0.601	5887	0
Cellular Component	GO:0033644	host cell membrane	0.01276	1.501	2.088	5.477	-2.6994	0.893	0	33644	0
Biological Process	GO:0051301	cell division	0.01357	-1.112	-4.493	5.829	-3.0004	0.915	0.099	51301	0
Cellular Component	GO:0019028	viral capsid	0.01438	0.792	6.279	5.529	-2.3984	0.95	0	19028	0
Cellular Component	GO:0009507	chloroplast	0.01445	-6.295	-1.371	5.531	-3.0004	0.559	0.566	9507	0
Molecular Function	GO:0004519	endonuclease activity	0.0151	null	null	5.854	-3.0004	0.827	0.732	4518	1
Biological Process	GO:0015031	protein transport	0.01595	0.982	-7.619	5.9	-3.0004	0.885	0.366	15031	0
Molecular Function	GO:0016798	hydrolase activity, acting on glycosyl bonds	0.01609	6.07	3.306	5.881	-3.0004	0.868	0.32	16798	0
Molecular Function	GO:0016757	transferase activity, transferring glycosyl groups	0.01747	-7.095	-0.874	5.917	-3.0004	0.875	0.314	16757	0
Biological Process	GO:0044262	cellular carbohydrate metabolic process	0.01835	-1.522	-0.973	5.96	-2.5233	0.947	0.367	44262	0
Biological Process	GO:0006310	DNA recombination	0.0184	2.163	7.541	5.962	-3.0004	0.895	0.652	6310	0
Molecular Function	GO:0004672	protein kinase activity	0.01875	-7.05	0.708	5.948	-3.0004	0.829	0.476	4672	0
Biological Process	GO:0006281	DNA repair	0.01953	-5.447	3.787	5.988	-3.0004	0.625	0.621	6281	0
Biological Process	GO:0006974	cellular response to DNA damage stimulus	0.01978	null	null	5.993	-3.0004	0.717	0.934	6281	1
Cellular Component	GO:0005743	mitochondrial inner membrane	0.02192	-5.776	-2.128	5.712	-3.0004	0.498	0.624	5743	0
Biological Process	GO:0006820	anion transport	0.02199	1.448	-7.539	6.039	-3.0004	0.853	0.541	6820	0
Molecular Function	GO:0016614	oxidoreductase activity, acting on CH-OH group of donors	0.02312	-0.447	6.913	6.039	-2.5233	0.878	0.38	16614	0
Molecular Function	GO:0005506	iron ion binding	0.02467	1.672	0.319	6.067	-3.0004	0.911	0.133	5506	0
Molecular Function	GO:0005515	protein binding	0.02482	-3.007	-4.715	6.07	-3.0004	0.942	0	5515	0
Biological Process	GO:0090305	nucleic acid phosphodiester bond hydrolysis	0.02508	2.014	7.074	6.096	-3.0004	0.904	0.28	90305	0
Molecular Function	GO:0004518	nuclease activity	0.02633	5.501	3.724	6.095	-3.0004	0.828	0.343	4518	0
Biological Process	GO:0035556	intracellular signal transduction	0.02718	null	null	6.131	-3.0004	0.654	0.912	6281	1
Cellular Component	GO:0031090	organelle membrane	0.02751	-5.846	-3.578	5.81	-3.0004	0.571	0.689	31090	0
Biological Process	GO:0032259	methylation	0.02781	-3.599	-4.551	6.141	-2.5233	0.988	0.005	32259	0
Biological Process	GO:0006396	RNA processing	0.02784	1.692	7.045	6.141	-2.6994	0.893	0.405	6396	0
Cellular Component	GO:0005634	nucleus	0.02809	-6.087	-3.37	5.819	-3.0004	0.598	0.471	5634	0
Biological Process	GO:0006464	cellular protein modification process	0.02895	0.482	7.012	6.158	-3.0004	0.877	0.199	6464	0
Molecular Function	GO:0016779	nucleotidyltransferase activity	0.02934	-7.299	0.477	6.142	-3.0004	0.834	0.578	16779	0
Molecular Function	GO:0016853	isomerase activity	0.03154	-5.283	-3.546	6.174	-3.0004	0.938	0.033	16853	0
Molecular Function	GO:0016746	transferase activity, transferring acyl groups	0.0324	-6.879	1.74	6.185	-3.0004	0.868	0.014	16746	0
Molecular Function	GO:0008233	peptidase activity	0.03609	4.428	3.302	6.232	-3.0004	0.859	0.033	8233	0
Biological Process	GO:0008652	cellular amino acid biosynthetic process	0.03697	4.829	2.68	6.265	-3.0004	0.835	0.423	8652	0
Biological Process	GO:0006508	proteolysis	0.03705	0.49	6.896	6.266	-3.0004	0.916	0.537	6508	0
Cellular Component	GO:0030312	external encapsulating structure	0.03733	0.785	-7.249	5.943	-2.2223	0.868	0.361	30312	0
Biological Process	GO:0006200	(obsolete) ATP catabolic process	0.03745	-2.264	-2.315	6.27	-3.0004	0.992	0	6200	0
Biological Process	GO:0007165	signal transduction	0.03804	null	null	6.277	-3.0004	0.646	0.721	6281	1
Biological Process	GO:0006812	cation transport	0.03981	null	null	6.297	-2.6994	0.845	0.821	6820	1
Biological Process	GO:0034220	ion transmembrane transport	0.03995	null	null	6.298	-3.0004	0.814	0.752	6820	1
Cellular Component	GO:0019012	virion	0.04083	4.07	0.402	5.982	-2.3984	0.971	0	19012	0
Biological Process	GO:0006950	response to stress	0.04119	-7.443	0.589	6.312	-3.0004	0.766	0.514	6950	0
Molecular Function	GO:0016829	lyase activity	0.04488	-4.234	1.835	6.327	-3.0004	0.937	0.035	16829	0
Cellular Component	GO:0005576	extracellular region	0.04572	5.586	0.641	6.031	-3.0004	0.971	0	5576	0
Molecular Function	GO:0016301	kinase activity	0.05084	-7.303	0.608	6.381	-3.0004	0.826	0.666	16301	0
Molecular Function	GO:0016887	ATPase activity	0.05234	null	null	6.394	-2.3984	0.842	0.86	17111	1
Biological Process	GO:0006811	ion transport	0.05991	1.493	-7.534	6.474	-3.0004	0.857	0.699	6811	0
Biological Process	GO:0016310	phosphorylation	0.063	-2.199	5.504	6.496	-3.0004	0.936	0.043	16310	0
Molecular Function	GO:0017111	nucleoside-triphosphatase activity	0.07074	4.862	3.67	6.525	-2.3015	0.838	0.4	17111	0
Cellular Component	GO:0043234	protein complex	0.08273	-4.044	5.908	6.288	-2.3984	0.874	0.396	43234	0
Biological Process	GO:0006355	regulation of transcription, DNA-templated	0.08419	null	null	6.622	-3.0004	0.757	1.215	31348	1
Cellular Component	GO:0043231	intracellular membrane-bounded organelle	0.08847	null	null	6.318	-3.0004	0.563	0.728	5634	1
Biological Process	GO:0006351	transcription, DNA-templated	0.09014	null	null	6.652	-3.0004	0.834	1.978	31348	1
Molecular Function	GO:0016772	transferase activity, transferring phosphorus-containing groups	0.09188	-7.267	-0.504	6.638	-3.0004	0.857	0.404	16772	0
Biological Process	GO:0055085	transmembrane transport	0.09397	2.03	-6.953	6.67	-3.0004	0.817	0.586	55085	0
Molecular Function	GO:0005524	ATP binding	0.13885	null	null	6.817	-3.0004	0.894	0.711	166	1
Cellular Component	GO:0005886	plasma membrane	0.13934	1.196	-6.65	6.515	-3.0004	0.833	0.547	5886	0
Molecular Function	GO:0016491	oxidoreductase activity	0.14657	-3.16	-2.356	6.841	-3.0004	0.934	0.066	16491	0
Biological Process	GO:0055114	oxidation-reduction process	0.15044	-0.182	0.064	6.874	-3.0004	0.92	0.118	55114	0
Molecular Function	GO:0046872	metal ion binding	0.15488	1.187	0.194	6.865	-3.0004	0.903	0.558	46872	0
Molecular Function	GO:0000166	nucleotide binding	0.20353	2.007	-2.638	6.983	-3.0004	0.913	0.285	166	0
Molecular Function	GO:0016740	transferase activity	0.22118	-2.552	-6.411	7.02	-3.0004	0.934	0.049	16740	0
Cellular Component	GO:0016021	integral component of membrane	0.3523	3.523	-3.894	6.918	-3.0004	0.908	0.141	16021	0
Cellular Component	GO:0005737	cytoplasm	0.38159	-1.63	1.217	6.952	-3.0004	0.837	0.137	5737	0
Cellular Component	GO:0016020	membrane	0.5172	0.248	4.729	7.085	-3.0004	0.985	0	16020	0
Cellular Component	GO:0005623	cell	0.64133	4.239	-1.918	7.178	-3.0004	0.989	0	5623	0
Biological Process	GO:0008152	metabolic process	0.82183	-2.536	-3.024	7.612	-2.6994	0.999	0	8152	0

## Sheet: Elevated CO2 & temp.
Supplementary Table 5. Gene ontology categories for the differentially expressed transcripts under elevated [CO2] and high temperature (EC-HT) relative to the treatment under ambient [CO2] and temperature (AC-AT). Gene ontology terms were also displayed on ReviGO attending to molecular functions, cellular components and biological processes.
Ontology	term_ID	description	frequency	plot_X	plot_Y	plot_size	log10 p-value	uniqueness	dispensability	representative	eliminated
Biological Process	GO:0007623	circadian rhythm	0.00012	-0.077	2.013	3.779	-3.0004	0.977	0	7623	0
Biological Process	GO:0042753	positive regulation of circadian rhythm	1e-05	null	null	2.59	-3.0004	0.89	0.82	7623	1
Biological Process	GO:0045454	cell redox homeostasis	0.00596	-1.32	-1.25	5.472	-3.0004	0.816	0	45454	0
Biological Process	GO:0030003	cellular cation homeostasis	0.0017	null	null	4.927	-3.0004	0.832	0.832	45454	1
Biological Process	GO:0051707	response to other organism	0.00439	-7.596	0.335	5.34	-3.0004	0.682	0	51707	0
Biological Process	GO:0002238	response to molecule of fungal origin	1e-05	null	null	2.635	-3.0004	0.703	0.862	51707	1
Biological Process	GO:0002237	response to molecule of bacterial origin	0.00018	null	null	3.952	-3.0004	0.659	0.883	51707	1
Biological Process	GO:0009816	defense response to bacterium, incompatible interaction	1e-05	null	null	2.403	-2.6994	0.716	0.875	51707	1
Biological Process	GO:0009814	defense response, incompatible interaction	6e-05	null	null	3.507	-3.0004	0.695	0.717	51707	1
Biological Process	GO:0050832	defense response to fungus	8e-05	null	null	3.618	-3.0004	0.696	0.729	51707	1
Biological Process	GO:0009627	systemic acquired resistance	5e-05	null	null	3.415	-3.0004	0.692	0.707	51707	1
Biological Process	GO:0009620	response to fungus	0.00011	null	null	3.755	-3.0004	0.738	0.745	51707	1
Biological Process	GO:0009617	response to bacterium	0.00092	null	null	4.661	-3.0004	0.709	0.87	51707	1
Biological Process	GO:0042742	defense response to bacterium	0.00075	null	null	4.569	-3.0004	0.66	0.856	51707	1
Biological Process	GO:0006468	protein phosphorylation	0.01206	2.771	-4.882	5.778	-3.0004	0.887	0.03	6468	0
Biological Process	GO:0006464	cellular protein modification process	0.02895	null	null	6.158	-2.6994	0.888	0.864	6468	1
Biological Process	GO:0015706	nitrate transport	0.00026	1.955	6.424	4.113	-3.0004	0.862	0.042	15706	0
Biological Process	GO:0032197	transposition, RNA-mediated	0	-0.232	0.939	2.127	-3.0004	0.939	0.056	32197	0
Biological Process	GO:0009407	toxin catabolic process	3e-05	1.15	-0.011	3.095	-3.0004	0.919	0.064	9407	0
Biological Process	GO:0009697	salicylic acid biosynthetic process	3e-05	2.095	-2.119	3.108	-3.0004	0.885	0.064	9697	0
Biological Process	GO:0048765	root hair cell differentiation	4e-05	0.393	-0.745	3.296	-3.0004	0.78	0.066	48765	0
Biological Process	GO:0048527	lateral root development	2e-05	null	null	2.885	-3.0004	0.794	0.887	48765	1
Biological Process	GO:0048767	root hair elongation	2e-05	null	null	3.01	-3.0004	0.758	0.968	48765	1
Biological Process	GO:0030048	actin filament-based movement	5e-05	0.001	0.681	3.365	-3.0004	0.932	0.067	30048	0
Biological Process	GO:0007020	microtubule nucleation	5e-05	0.708	0.179	3.405	-3.0004	0.897	0.067	7020	0
Biological Process	GO:0055114	oxidation-reduction process	0.15044	2.016	1.273	6.874	-3.0004	0.913	0.09	55114	0
Biological Process	GO:0012501	programmed cell death	0.00273	0.048	1.608	5.133	-3.0004	0.86	0.091	12501	0
Biological Process	GO:2001235	positive regulation of apoptotic signaling pathway	9e-05	null	null	3.635	-3.0004	0.666	0.769	12501	1
Biological Process	GO:0010363	regulation of plant-type hypersensitive response	4e-05	null	null	3.325	-3.0004	0.649	0.735	12501	1
Biological Process	GO:0008219	cell death	0.00278	null	null	5.141	-3.0004	0.86	0.995	12501	1
Biological Process	GO:0009626	plant-type hypersensitive response	5e-05	null	null	3.377	-3.0004	0.677	0.992	12501	1
Biological Process	GO:0043069	negative regulation of programmed cell death	0.00049	null	null	4.391	-3.0004	0.805	0.99	12501	1
Biological Process	GO:0043066	negative regulation of apoptotic process	0.00047	null	null	4.365	-3.0004	0.806	0.864	12501	1
Biological Process	GO:0032196	transposition	0.0061	0.218	1.175	5.482	-3.0004	0.911	0.098	32196	0
Biological Process	GO:0006075	(1-&gt;3)-beta-D-glucan biosynthetic process	3e-05	2.312	-2.961	3.168	-3.0004	0.895	0.174	6075	0
Biological Process	GO:0006261	DNA-dependent DNA replication	0.00438	3.882	-5.716	5.338	-3.0004	0.894	0.184	6261	0
Biological Process	GO:0006278	RNA-dependent DNA replication	0.00453	null	null	5.353	-3.0004	0.894	0.708	6261	1
Biological Process	GO:0006886	intracellular protein transport	0.00521	1.671	6.727	5.413	-3.0004	0.878	0.214	6886	0
Biological Process	GO:0015031	protein transport	0.01595	null	null	5.9	-2.6994	0.878	0.855	6886	1
Biological Process	GO:0006612	protein targeting to membrane	0.00109	null	null	4.733	-3.0004	0.812	0.823	6886	1
Biological Process	GO:0006897	endocytosis	0.002	null	null	4.998	-3.0004	0.912	0.752	6886	1
Biological Process	GO:0006888	ER to Golgi vesicle-mediated transport	0.00019	null	null	3.984	-3.0004	0.87	0.706	6886	1
Biological Process	GO:0015692	lead ion transport	0	2.079	6.08	1.204	-3.0004	0.899	0.227	15692	0
Biological Process	GO:0016192	vesicle-mediated transport	0.00381	1.746	6.327	5.277	-2.6994	0.915	0.267	16192	0
Biological Process	GO:0002679	respiratory burst involved in defense response	1e-05	-7.022	0.886	2.866	-3.0004	0.751	0.268	2679	0
Biological Process	GO:0051302	regulation of cell division	0.00069	-1.879	-1.256	4.537	-3.0004	0.855	0.277	51302	0
Biological Process	GO:0090305	nucleic acid phosphodiester bond hydrolysis	0.02508	3.75	-5.663	6.096	-3.0004	0.901	0.28	90305	0
Biological Process	GO:0009723	response to ethylene	5e-05	-7.383	0.626	3.385	-3.0004	0.739	0.288	9723	0
Biological Process	GO:0009733	response to auxin	0.0001	null	null	3.707	-3.0004	0.73	0.749	9723	1
Biological Process	GO:0006984	ER-nucleus signaling pathway	6e-05	-5.776	-0.497	3.461	-3.0004	0.735	0.292	6984	0
Biological Process	GO:0090501	RNA phosphodiester bond hydrolysis	0.00762	3.341	-5.396	5.579	-3.0004	0.897	0.299	90501	0
Biological Process	GO:0009409	response to cold	0.00024	-6.778	0.506	4.074	-3.0004	0.757	0.322	9409	0
Biological Process	GO:0019722	calcium-mediated signaling	8e-05	-6.027	-0.594	3.602	-3.0004	0.731	0.328	19722	0
Biological Process	GO:0044281	small molecule metabolic process	0.215	1.724	1.036	7.029	-2.5233	0.911	0.328	44281	0
Biological Process	GO:0070574	cadmium ion transmembrane transport	9e-05	1.962	6.527	3.66	-3.0004	0.844	0.342	70574	0
Biological Process	GO:0034976	response to endoplasmic reticulum stress	0.00011	-7.727	0.663	3.742	-3.0004	0.773	0.351	34976	0
Biological Process	GO:0006691	leukotriene metabolic process	3e-05	2.222	-1.46	3.205	-3.0004	0.889	0.352	6691	0
Biological Process	GO:0006693	prostaglandin metabolic process	2e-05	null	null	2.988	-3.0004	0.891	0.918	6691	1
Biological Process	GO:0043269	regulation of ion transport	0.0013	1.357	5.539	4.811	-3.0004	0.783	0.355	43269	0
Biological Process	GO:0044070	regulation of anion transport	0.00063	null	null	4.497	-3.0004	0.784	0.885	43269	1
Biological Process	GO:0010193	response to ozone	0	-7.726	0.924	2.13	-3.0004	0.743	0.358	10193	0
Biological Process	GO:0042398	cellular modified amino acid biosynthetic process	0.00705	2.912	-2.858	5.545	-3.0004	0.858	0.378	42398	0
Biological Process	GO:0006200	ATP catabolic process	0.03745	3.383	-4.089	6.27	-3.0004	0.831	0.387	6200	0
Biological Process	GO:0016117	carotenoid biosynthetic process	0.0004	2.415	-1.949	4.3	-3.0004	0.876	0.392	16117	0
Biological Process	GO:0016114	terpenoid biosynthetic process	0.00275	null	null	5.136	-2.6994	0.862	0.856	16117	1
Biological Process	GO:0043090	amino acid import	2e-05	2.116	6.619	2.978	-3.0004	0.874	0.397	43090	0
Biological Process	GO:0009611	response to wounding	0.00111	-6.827	0.48	4.744	-3.0004	0.767	0.404	9611	0
Biological Process	GO:0009870	defense response signaling pathway, resistance gene-dependent	0	-5.856	-0.301	2	-3.0004	0.7	0.424	9870	0
Biological Process	GO:0006598	polyamine catabolic process	0.00015	2.487	-1.678	3.864	-3.0004	0.939	0.434	6598	0
Biological Process	GO:0006364	rRNA processing	0.00759	3.463	-5.576	5.577	-3.0004	0.853	0.451	6364	0
Biological Process	GO:0052542	defense response by callose deposition	1e-05	-5.38	4.539	2.615	-3.0004	0.731	0.454	52542	0
Biological Process	GO:0052544	defense response by callose deposition in cell wall	0	null	null	2.041	-3.0004	0.677	0.922	52542	1
Biological Process	GO:0010183	pollen tube guidance	0	-6.149	-0.732	2.1	-3.0004	0.632	0.461	10183	0
Biological Process	GO:0080092	regulation of pollen tube growth	0	null	null	2.072	-3.0004	0.662	0.802	10183	1
Biological Process	GO:0048544	recognition of pollen	9e-05	null	null	3.652	-3.0004	0.698	0.85	10183	1
Biological Process	GO:0009846	pollen germination	1e-05	null	null	2.571	-3.0004	0.772	0.727	10183	1
Biological Process	GO:0006355	regulation of transcription, DNA-templated	0.08419	1.936	-5.358	6.622	-3.0004	0.761	0.467	6355	0
Biological Process	GO:0006351	transcription, DNA-templated	0.09014	null	null	6.652	-3.0004	0.865	0.883	6355	1
Biological Process	GO:0006508	proteolysis	0.03705	2.316	-4.48	6.266	-3.0004	0.923	0.476	6508	0
Biological Process	GO:0016310	phosphorylation	0.063	2.099	-2.009	6.496	-3.0004	0.932	0.493	16310	0
Biological Process	GO:0006855	drug transmembrane transport	0.00162	-4.585	5.145	4.906	-3.0004	0.633	0.497	6855	0
Biological Process	GO:0015074	DNA integration	0.00781	3.717	-5.627	5.59	-3.0004	0.899	0.502	15074	0
Biological Process	GO:0006820	anion transport	0.02199	2.134	7.437	6.039	-3.0004	0.827	0.506	6820	0
Biological Process	GO:0034220	ion transmembrane transport	0.03995	null	null	6.298	-2.5233	0.787	0.752	6820	1
Biological Process	GO:0075713	establishment of integrated proviral latency	0.00025	-2.73	1.164	4.093	-3.0004	0.875	0.508	75713	0
Biological Process	GO:0046686	response to cadmium ion	4e-05	-7.029	0.607	3.301	-3.0004	0.776	0.513	46686	0
Biological Process	GO:0006950	response to stress	0.04119	-6.97	0.437	6.312	-3.0004	0.745	0.514	6950	0
Biological Process	GO:0009992	cellular water homeostasis	0	-1.061	-1.204	1.996	-3.0004	0.88	0.524	9992	0
Biological Process	GO:0006635	fatty acid beta-oxidation	0.00053	2.722	-1.668	4.418	-3.0004	0.871	0.526	6635	0
Biological Process	GO:0006979	response to oxidative stress	0.00539	-6.941	0.445	5.428	-3.0004	0.744	0.526	6979	0
Biological Process	GO:0048522	positive regulation of cellular process	0.00429	-2.325	-1.545	5.329	-3.0004	0.846	0.533	48522	0
Biological Process	GO:0008284	positive regulation of cell proliferation	0.00044	null	null	4.336	-3.0004	0.845	0.751	48522	1
Biological Process	GO:0045893	positive regulation of transcription, DNA-templated	0.00193	null	null	4.983	-3.0004	0.797	0.846	48522	1
Biological Process	GO:0009555	pollen development	5e-05	0.34	-0.826	3.371	-3.0004	0.809	0.533	9555	0
Biological Process	GO:0009556	microsporogenesis	0	null	null	2.393	-3.0004	0.788	0.837	9555	1
Biological Process	GO:0010584	pollen exine formation	1e-05	null	null	2.728	-3.0004	0.787	0.867	9555	1
Biological Process	GO:0046777	protein autophosphorylation	0.00022	2.184	-3.881	4.038	-3.0004	0.913	0.536	46777	0
Biological Process	GO:0016132	brassinosteroid biosynthetic process	2e-05	0.786	-2.916	2.947	-3.0004	0.836	0.541	16132	0
Biological Process	GO:0019076	viral release from host cell	0.00062	-2.132	0.601	4.489	-3.0004	0.868	0.544	19076	0
Biological Process	GO:0046718	viral entry into host cell	0.00797	null	null	5.598	-3.0004	0.847	0.713	19076	1
Biological Process	GO:0010583	response to cyclopentenone	1e-05	-6.751	0.581	2.843	-3.0004	0.757	0.553	10583	0
Biological Process	GO:0071366	cellular response to indolebutyric acid stimulus	0	-6.351	0.565	0.845	-3.0004	0.758	0.554	71366	0
Biological Process	GO:0000041	transition metal ion transport	0.00365	2.17	7.405	5.259	-3.0004	0.849	0.561	41	0
Biological Process	GO:0018108	peptidyl-tyrosine phosphorylation	0.0005	3.328	-4.712	4.399	-3.0004	0.908	0.573	18108	0
Biological Process	GO:0045087	innate immune response	0.00137	-7.549	0.659	4.832	-3.0004	0.721	0.58	45087	0
Biological Process	GO:0031347	regulation of defense response	0.00305	null	null	5.181	-3.0004	0.658	0.956	45087	1
Biological Process	GO:0031348	negative regulation of defense response	0.0028	null	null	5.144	-3.0004	0.651	0.824	45087	1
Biological Process	GO:0006310	DNA recombination	0.0184	3.824	-5.868	5.962	-3.0004	0.891	0.584	6310	0
Biological Process	GO:0055085	transmembrane transport	0.09397	2.547	6.572	6.67	-3.0004	0.796	0.586	55085	0
Biological Process	GO:0030968	endoplasmic reticulum unfolded protein response	5e-05	-6.733	-0.418	3.363	-3.0004	0.65	0.586	30968	0
Biological Process	GO:0006952	defense response	0.00569	-6.965	0.45	5.452	-3.0004	0.744	0.588	6952	0
Biological Process	GO:0010075	regulation of meristem growth	3e-05	-0.766	-1.775	3.166	-3.0004	0.731	0.589	10075	0
Biological Process	GO:0009826	unidimensional cell growth	6e-05	null	null	3.466	-3.0004	0.775	0.796	10075	1
Biological Process	GO:0051510	regulation of unidimensional cell growth	1e-05	null	null	2.829	-3.0004	0.739	0.907	10075	1
Biological Process	GO:0009860	pollen tube growth	2e-05	null	null	3.084	-3.0004	0.671	0.932	10075	1
Biological Process	GO:0009932	cell tip growth	3e-05	null	null	3.231	-3.0004	0.777	0.86	10075	1
Biological Process	GO:0001708	cell fate specification	7e-05	0.247	-0.744	3.549	-3.0004	0.817	0.595	1708	0
Biological Process	GO:0015696	ammonium transport	0.00048	2.027	6.83	4.374	-2.6994	0.854	0.607	15696	0
Biological Process	GO:0009630	gravitropism	3e-05	-6.716	0.479	3.098	-3.0004	0.774	0.608	9630	0
Biological Process	GO:0016567	protein ubiquitination	0.00107	2.851	-4.656	4.726	-3.0004	0.911	0.611	16567	0
Biological Process	GO:0048481	ovule development	3e-05	0.199	-0.735	3.21	-3.0004	0.779	0.613	48481	0
Biological Process	GO:0010228	vegetative to reproductive phase transition of meristem	9e-05	null	null	3.674	-3.0004	0.779	0.777	48481	1
Biological Process	GO:0009793	embryo development ending in seed dormancy	8e-05	null	null	3.6	-3.0004	0.781	0.814	48481	1
Biological Process	GO:0048657	anther wall tapetum cell differentiation	0	null	null	1.681	-3.0004	0.787	0.779	48481	1
Biological Process	GO:0048653	anther development	1e-05	null	null	2.849	-3.0004	0.785	0.969	48481	1
Biological Process	GO:0048443	stamen development	3e-05	null	null	3.143	-3.0004	0.779	0.906	48481	1
Biological Process	GO:0006865	amino acid transport	0.00981	2.067	7.218	5.689	-3.0004	0.817	0.627	6865	0
Biological Process	GO:0015802	basic amino acid transport	0.0002	2.164	7.111	4.006	-3.0004	0.857	0.647	15802	0
Biological Process	GO:0009639	response to red or far red light	9e-05	-6.604	0.524	3.651	-3.0004	0.787	0.652	9639	0
Biological Process	GO:0010218	response to far red light	2e-05	null	null	3.01	-3.0004	0.796	0.705	9639	1
Biological Process	GO:0009585	red, far-red light phototransduction	2e-05	null	null	3.053	-3.0004	0.682	0.867	9639	1
Biological Process	GO:0010017	red or far-red light signaling pathway	2e-05	null	null	3.094	-3.0004	0.71	0.995	9639	1
Biological Process	GO:0009651	response to salt stress	9e-05	-6.769	0.51	3.664	-3.0004	0.768	0.653	9651	0
Biological Process	GO:0009825	multidimensional cell growth	1e-05	0.01	1.113	2.796	-3.0004	0.878	0.653	9825	0
Biological Process	GO:0016045	detection of bacterium	2e-05	-6.566	0.457	2.944	-3.0004	0.752	0.66	16045	0
Biological Process	GO:0006397	mRNA processing	0.00373	2.802	-5.085	5.269	-2.5233	0.903	0.665	6397	0
Biological Process	GO:0015691	cadmium ion transport	9e-05	1.993	6.493	3.662	-3.0004	0.865	0.671	15691	0
Biological Process	GO:0070838	divalent metal ion transport	0.00193	null	null	4.982	-2.6994	0.839	0.778	15691	1
Biological Process	GO:0010200	response to chitin	4e-05	-7.37	0.633	3.243	-3.0004	0.735	0.672	10200	0
Biological Process	GO:0007165	signal transduction	0.03804	-5.792	-0.36	6.277	-3.0004	0.611	0.686	7165	0
Biological Process	GO:0009414	response to water deprivation	7e-05	-7.17	0.527	3.547	-3.0004	0.68	0.691	9414	0
Biological Process	GO:0009753	response to jasmonic acid	5e-05	null	null	3.383	-3.0004	0.716	0.793	9414	1
Biological Process	GO:0009751	response to salicylic acid	5e-05	null	null	3.367	-3.0004	0.719	0.792	9414	1
Biological Process	GO:0010167	response to nitrate	2e-05	null	null	2.92	-3.0004	0.74	0.752	9414	1
Biological Process	GO:0000302	response to reactive oxygen species	0.00215	null	null	5.029	-3.0004	0.68	0.733	9414	1
Biological Process	GO:0009738	abscisic acid-activated signaling pathway	4e-05	null	null	3.263	-3.0004	0.639	0.868	9414	1
Biological Process	GO:0009737	response to abscisic acid	7e-05	null	null	3.558	-3.0004	0.71	0.81	9414	1
Biological Process	GO:0009739	response to gibberellin	1e-05	null	null	2.867	-3.0004	0.73	0.748	9414	1
Biological Process	GO:0009867	jasmonic acid mediated signaling pathway	4e-05	null	null	3.259	-3.0004	0.64	0.782	9414	1
Biological Process	GO:0009862	systemic acquired resistance, salicylic acid mediated signaling pathway	3e-05	null	null	3.161	-3.0004	0.548	0.981	9414	1
Biological Process	GO:0009863	salicylic acid mediated signaling pathway	4e-05	null	null	3.328	-3.0004	0.638	0.811	9414	1
Biological Process	GO:0090502	RNA phosphodiester bond hydrolysis, endonucleolytic	0.00424	3.291	-5.334	5.324	-3.0004	0.901	0.695	90502	0
Biological Process	GO:0008360	regulation of cell shape	0.00716	-0.528	-1.975	5.552	-3.0004	0.675	0.698	8360	0
Biological Process	GO:0006811	ion transport	0.05991	2.152	7.306	6.474	-3.0004	0.837	0.699	6811	0
Biological Process	GO:0008544	epidermis development	0.00021	0.326	-0.754	4.015	-3.0004	0.793	0.7	8544	0
Biological Process	GO:0010103	stomatal complex morphogenesis	3e-05	null	null	3.205	-3.0004	0.792	0.887	8544	1
Cellular Component	GO:0005623	cell	0.64133	-3.237	-3.201	7.178	-3.0004	0.976	0	5623	0
Cellular Component	GO:0009506	plasmodesma	0.00022	-0.312	6.076	3.707	-3.0004	0.934	0	9506	0
Cellular Component	GO:0009507	chloroplast	0.01445	6.26	-1.58	5.531	-3.0004	0.602	0	9507	0
Cellular Component	GO:0009535	chloroplast thylakoid membrane	0.00212	null	null	4.697	-2.5233	0.616	0.784	9507	1
Cellular Component	GO:0016020	membrane	0.5172	-5.956	0.027	7.085	-3.0004	0.968	0	16020	0
Cellular Component	GO:0019012	virion	0.04083	0.254	2.611	5.982	-3.0004	0.937	0	19012	0
Cellular Component	GO:0019028	viral capsid	0.01438	3.799	5.733	5.529	-3.0004	0.894	0	19028	0
Cellular Component	GO:0042025	host cell nucleus	0.00969	-3.859	3.556	5.357	-3.0004	0.753	0	42025	0
Cellular Component	GO:0020002	host cell plasma membrane	0.01029	null	null	5.383	-3.0004	0.751	0.805	42025	1
Cellular Component	GO:0033644	host cell membrane	0.01276	null	null	5.477	-3.0004	0.749	0.963	42025	1
Cellular Component	GO:0030430	host cell cytoplasm	0.00734	null	null	5.237	-3.0004	0.756	0.9	42025	1
Cellular Component	GO:0045202	synapse	0.00094	-2.786	-0.177	4.343	-3.0004	0.935	0	45202	0
Cellular Component	GO:0000148	1,3-beta-D-glucan synthase complex	6e-05	-1.908	-6.913	3.163	-3.0004	0.852	0.023	148	0
Cellular Component	GO:0012505	endomembrane system	0.00696	-5.773	-3.523	5.213	-3.0004	0.903	0.035	12505	0
Cellular Component	GO:0016021	integral component of membrane	0.3523	1.566	-7.805	6.918	-3.0004	0.883	0.118	16021	0
Cellular Component	GO:0005737	cytoplasm	0.38159	6.749	2.567	6.952	-3.0004	0.839	0.18	5737	0
Cellular Component	GO:0005886	plasma membrane	0.13934	-0.11	-7.154	6.515	-3.0004	0.829	0.247	5886	0
Cellular Component	GO:0000943	retrotransposon nucleocapsid	0	6.071	-4.485	1.973	-3.0004	0.737	0.265	943	0
Cellular Component	GO:0031410	cytoplasmic vesicle	0.00167	6.951	-0.735	4.594	-2.5233	0.725	0.324	31410	0
Cellular Component	GO:0005741	mitochondrial outer membrane	0.00043	6.773	-3.141	4.008	-3.0004	0.609	0.369	5741	0
Cellular Component	GO:0005774	vacuolar membrane	0.00062	null	null	4.163	-3.0004	0.56	0.729	5741	1
Cellular Component	GO:0009705	plant-type vacuole membrane	2e-05	null	null	2.674	-2.6994	0.622	0.81	5741	1
Cellular Component	GO:0005764	lysosome	0.00049	null	null	4.063	-3.0004	0.631	0.91	5741	1
Cellular Component	GO:0005783	endoplasmic reticulum	0.00299	5.826	-2.132	4.846	-3.0004	0.634	0.44	5783	0
Cellular Component	GO:0005789	endoplasmic reticulum membrane	0.00136	null	null	4.506	-3.0004	0.554	0.795	5783	1
Cellular Component	GO:0048046	apoplast	0.00023	-3.464	3.986	3.735	-3.0004	0.821	0.453	48046	0
Cellular Component	GO:0005887	integral component of plasma membrane	0.01253	-0.816	-7.291	5.469	-2.6994	0.816	0.48	5887	0
Cellular Component	GO:0031090	organelle membrane	0.02751	5.672	-3.236	5.81	-3.0004	0.587	0.558	31090	0
Cellular Component	GO:0005634	nucleus	0.02809	6.646	-1.869	5.819	-3.0004	0.604	0.61	5634	0
Cellular Component	GO:0043231	intracellular membrane-bounded organelle	0.08847	null	null	6.318	-3.0004	0.573	0.728	5634	1
Cellular Component	GO:0019013	viral nucleocapsid	0.00446	3.416	5.797	5.02	-3.0004	0.893	0.652	19013	0
Molecular Function	GO:0004518	nuclease activity	0.02633	1.031	6.548	6.095	-3.0004	0.666	0	4518	0
Molecular Function	GO:0004540	ribonuclease activity	0.00801	null	null	5.578	-3.0004	0.663	0.785	4518	1
Molecular Function	GO:0004527	exonuclease activity	0.00817	null	null	5.587	-2.5233	0.662	0.787	4518	1
Molecular Function	GO:0004519	endonuclease activity	0.0151	null	null	5.854	-3.0004	0.65	0.732	4518	1
Molecular Function	GO:0043531	ADP binding	0.00067	3.685	-4.244	4.504	-3.0004	0.852	0	43531	0
Molecular Function	GO:0004497	monooxygenase activity	0.00779	-3.637	-6.055	5.567	-3.0004	0.861	0.027	4497	0
Molecular Function	GO:0030507	spectrin binding	2e-05	5.847	3.559	2.869	-3.0004	0.905	0.028	30507	0
Molecular Function	GO:0016779	nucleotidyltransferase activity	0.02934	-6.011	0.561	6.142	-3.0004	0.683	0.031	16779	0
Molecular Function	GO:0030247	polysaccharide binding	0.00035	5.55	1.23	4.214	-3.0004	0.901	0.034	30247	0
Molecular Function	GO:0016740	transferase activity	0.22118	1.74	0.747	7.02	-3.0004	0.886	0.045	16740	0
Molecular Function	GO:0005515	protein binding	0.02482	-0.053	-3.105	6.07	-2.5233	0.892	0.047	5515	0
Molecular Function	GO:0016491	oxidoreductase activity	0.14657	-4.103	7.685	6.841	-3.0004	0.884	0.066	16491	0
Molecular Function	GO:0046872	metal ion binding	0.15488	5.245	-2.019	6.865	-3.0004	0.867	0.16	46872	0
Molecular Function	GO:0032440	2-alkenal reductase [NAD(P)] activity	5e-05	-1.435	-6.406	3.378	-3.0004	0.849	0.222	32440	0
Molecular Function	GO:0004190	aspartic-type endopeptidase activity	0.00513	2.059	5.786	5.385	-3.0004	0.792	0.268	4190	0
Molecular Function	GO:0000166	nucleotide binding	0.20353	4.301	-3.715	6.983	-3.0004	0.836	0.285	166	0
Molecular Function	GO:0005524	ATP binding	0.13885	null	null	6.817	-3.0004	0.81	0.711	166	1
Molecular Function	GO:0008233	peptidase activity	0.03609	0.182	6.777	6.232	-3.0004	0.768	0.343	8233	0
Molecular Function	GO:0004713	protein tyrosine kinase activity	0.00043	-6.988	1.538	4.308	-3.0004	0.726	0.384	4713	0
Molecular Function	GO:0016772	transferase activity, transferring phosphorus-containing groups	0.09188	-5.915	2.368	6.638	-3.0004	0.749	0.397	16772	0
Molecular Function	GO:0047522	15-oxoprostaglandin 13-oxidase activity	0	-1.867	-6.386	1.699	-3.0004	0.856	0.489	47522	0
Molecular Function	GO:0003887	DNA-directed DNA polymerase activity	0.00591	-6.504	-0.104	5.446	-3.0004	0.715	0.501	3887	0
Molecular Function	GO:0004523	RNA-DNA hybrid ribonuclease activity	0.00176	1.375	6.95	4.921	-3.0004	0.691	0.575	4523	0
Molecular Function	GO:0004672	protein kinase activity	0.01875	-6.529	1.048	5.948	-3.0004	0.669	0.578	4672	0
Molecular Function	GO:0016301	kinase activity	0.05084	-6.55	0.555	6.381	-3.0004	0.672	0.666	16301	0
Molecular Function	GO:0004674	protein serine/threonine kinase activity	0.00565	-6.192	1.305	5.427	-3.0004	0.685	0.673	4674	0
